# Supplementary material for: A newly recognized theropod assemblage from the Lewisville Formation (Woodbine Group; Cenomanian) and its implications for understanding Late Cretaceous Appalachian terrestrial ecosystems
Source: PeerJ journal article supplement (doi:10.7717/peerj.12782), 2022-01-25

Figure S1

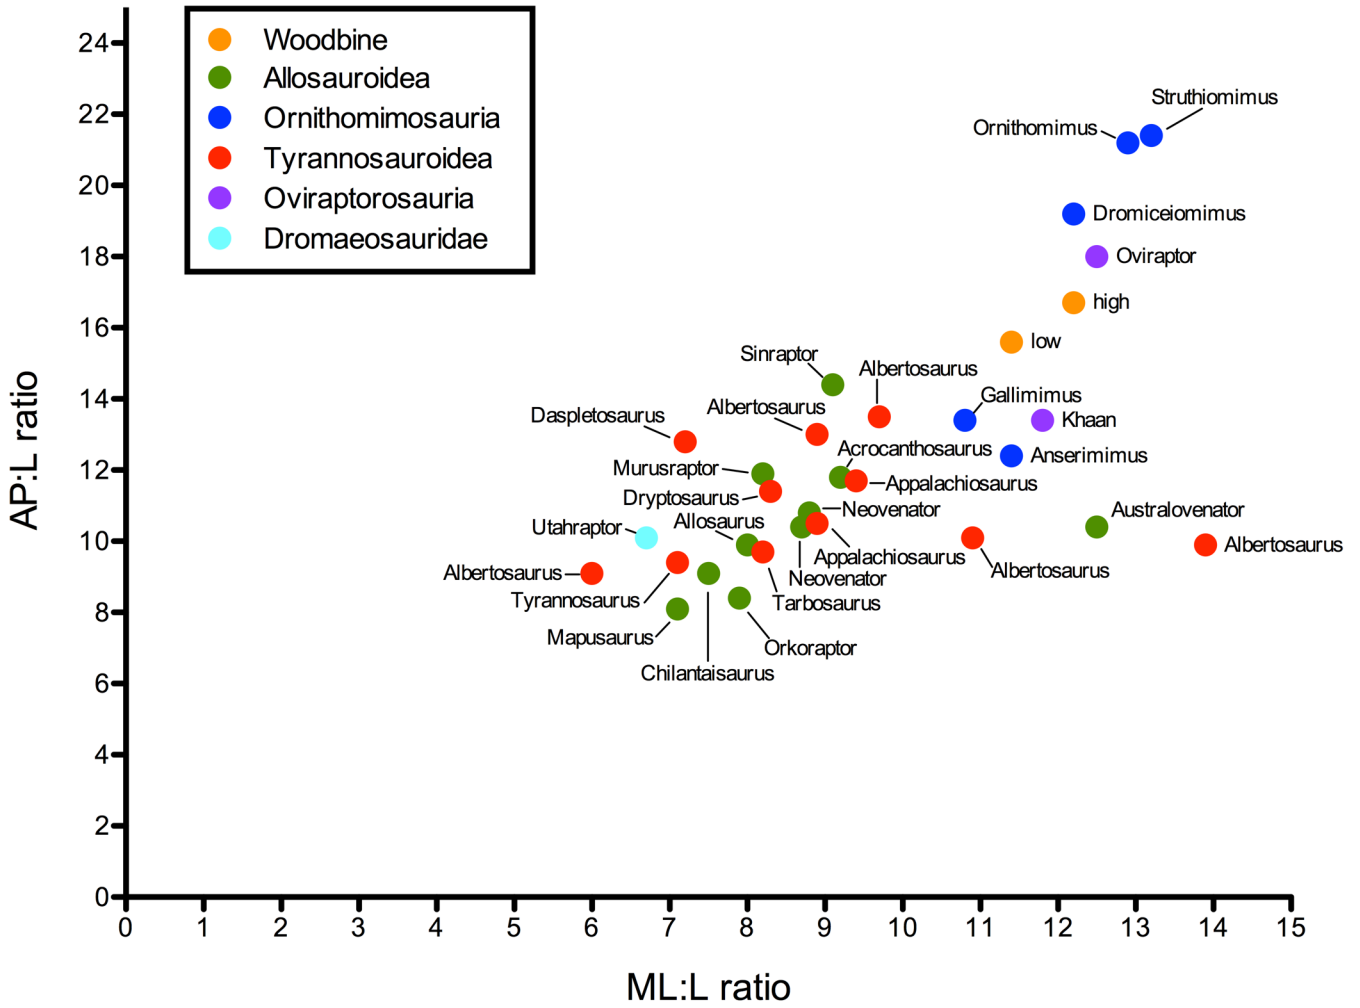

Supplement: Figure_S1.pdf [file Figure_S1.pdf]
