# Supplementary material for: A newly recognized theropod assemblage from the Lewisville Formation (Woodbine Group; Cenomanian) and its implications for understanding Late Cretaceous Appalachian terrestrial ecosystems
Source: PeerJ. 2022 Jan 25;10:e12782. doi: 10.7717/peerj.12782 (PMC8796713; doi:10.7717/peerj.12782)
Supplement: Supplemental Information 3 — The raw data show all tooth measurements and taxa used for each analysis, as well as the complete results of all analyses, including the incomplete and reconstructed tooth measurement datasets discussed in the text. [file peerj-10-12782-s003.xlsx]

## Sheet: Raw data
	Taxa (Genus)	Clade	Specimen	Position	Source	CBL	CBW	CH	AL	CBR	CHR	MCL	MCW	MCR	LAF	LIF	DDL	MDL	CA
	?	?	DMNH2013-07-1083	?	This study	7.17916	3.5583	17.5366	17.4695	0.495643	2.44271	6.15166	2.7219	0.442466	1	1	0.2614	0.232759	78.6904
	?	?	DMNH2013-07-1081	?	This study	17.2944	8.39518	44.7857	46.6874	0.485429	2.58961	14.5501	5.92493	0.40721	1	1	0.355932	0.32248	72.9664
	?	?	DMNH2014-06-06	?	This study	16.051	7.98634	37.3001	40.2567	0.497561	2.32385	13.3728	5.73463	0.428827	1	1	0.328688		67.8649
	?	?	DMNH2013-07-1701	?	This study	13.0168	8.28784	21.3203	24.5632	0.636703	1.6379	10.7206	6.40018	0.597001	1	1	0.326842		60.155
	?	?	SMU77218	?	This study	7.0228	4.0658	9.14781	10.5051	0.578942	1.30259	5.88169	3.32987	0.566142	1	1	0.252652	0.215385	58.9999
	?	?	DMNH2013-07-1080	?	This study	12.1322	6.15736	16.4643	20.9553	0.507521	1.35707	9.92646	5.29629	0.533553	1	1	0.335832	0.349159	51.6849
	?	?	DMNH2014-06-02	?	This study	8.71929	4.31524	13.935	15.8824	0.494908	1.59818	7.71145	3.83594	0.497434	1	1	0.283204		61.043
	?	?	SMU73779	?	This study	2.30511	0.933486	3.22362	3.59894	0.404963	1.39847	1.87727	0.840475	0.447712	1	1	0.123963	0.0928572	61.6682
	?	?	SMU76947	?	This study	3.00131	1.69587	5.82601	6.5563	0.565041	1.94116	2.97988	1.57029	0.526962	9	10	0.348241		62.6994
	?	?	SMU73778	?	This study	1.30172	0.728289	1.97525	2.0658	0.559481	1.51741	1.04916	0.573469	0.546598	1	1	0.100943	0.10641	67.4741
	?	?	SMU76948	?	This study	2.20605	0.972508	3.25465	3.5686	0.440836	1.47532	1.82759	0.921675	0.504311	1	1	0.15129		63.5673
	?	?	DMNH2013-07-1082	?	This study	4.89245	2.70269	10.096	11.4215	0.55242	2.06358	4.27039	2.14421	0.50211	1	1	0.222997	0.20675	62.0057
Eoraptor	Eoraptor	Basalmost Theropoda	PVSJ 512	pmx2	Hendrickx et al., 2015	2.5	1.62	6.74	7	0.648	2.696				1	1	0.2		73.7016
	Eoraptor	Basalmost Theropoda	PVSJ 512	pmx3	Hendrickx et al., 2015	1.97	2.35	5.92	6.38	1.19289	3.00508				1	1			67.6989
	Eoraptor	Basalmost Theropoda	PVSJ 512	pmx4	Hendrickx et al., 2015	2.19	1.74	6.52	6.08	0.794521	2.97717				1	1			91.6093
	Eoraptor	Basalmost Theropoda	PVSJ 512	pmx2	Hendrickx et al., 2015	2.17	1.56	5.01	5.4	0.718894	2.30876				1	1	0.166667		68.0276
	Eoraptor	Basalmost Theropoda	PVSJ 512	pmx4	Hendrickx et al., 2015	2.08	1.61	4.17	4.88	0.774038	2.00481				1	1	0.181818		58.0196
	Eoraptor	Basalmost Theropoda	PVSJ 512	mx2	Hendrickx et al., 2015	2.69	1.82	5.55	5.67	0.67658	2.0632				1	1	0.166667		73.6591
	Eoraptor	Basalmost Theropoda	PVSJ 512	mx4	Hendrickx et al., 2015	3.03	1.48	5.65	6.54	0.488449	1.86469				1	1	0.181818		59.6425
	Eoraptor	Basalmost Theropoda	PVSJ 512	mx5	Hendrickx et al., 2015	3.56	1.69	5.48	6.89	0.474719	1.53933				1	1	0.2	0.2	52.129
	Eoraptor	Basalmost Theropoda	PVSJ 512	mx9	Hendrickx et al., 2015	2.49	1.75	5.11	6.43	0.702811	2.05221				1	1	0.2	0.222222	47.9846
	Eoraptor	Basalmost Theropoda	PVSJ 512	mx10	Hendrickx et al., 2015	2.7	1.22	4.58	6.02	0.451852	1.6963				1	1	0.166667	0.2	46.0685
	Eoraptor	Basalmost Theropoda	PVSJ 512	mx11	Hendrickx et al., 2015	2.32	1.42	2.34	3.5	0.612069	1.00862				1	1	0.153846	0.25	41.5332
	Eoraptor	Basalmost Theropoda	PVSJ 512	mx17	Young et al., 2019 (C.H. pers. measurements)	1.77	1.39	1.6	2.57	0.785311	0.903955				1	1	0.181818		37.9116
	Eoraptor	Basalmost Theropoda	PVSJ 512	pm02	Smith & Lamanna, 2006	2.88	1.85	7.15	7.39	0.642361	2.48264						0.133333		73.9284
	Eoraptor	Basalmost Theropoda	PVSJ 512	pm03	Smith & Lamanna, 2006	1.98	1.48	5.73	5.86	0.747475	2.89394						0.166667		76.475
	Eoraptor	Basalmost Theropoda	PVSJ 512	pm04	Smith & Lamanna, 2006	1.89	1.55	6.12	6.2	0.820106	3.2381								78.786
	Eoraptor	Basalmost Theropoda	PVSJ 512	pm02	Smith & Lamanna, 2006	2.32	1.8	5.19	5.44	0.775862	2.23707						0.142857		71.4267
	Eoraptor	Basalmost Theropoda	PVSJ 512	mx02	Smith & Lamanna, 2006	2.11	1.51	5.71	5.91	0.71564	2.70616								74.2349
	Eoraptor	Basalmost Theropoda	PVSJ 512	mx04	Smith & Lamanna, 2006	3.04	1.97	6.58	7.61	0.648026	2.16447						0.166667		58.9608
	Eoraptor	Basalmost Theropoda	PVSJ 512	mx06	Smith & Lamanna, 2006	2.9	1.74	5.44	6.38	0.6	1.87586						0.166667		58.1611
	Eoraptor	Basalmost Theropoda	PVSJ 512	mx07	Smith & Lamanna, 2006	2.71	1.58	6.17	6.75	0.583026	2.27675						0.2		66.0733
	Eoraptor	Basalmost Theropoda	PVSJ 512	mx09	Smith & Lamanna, 2006	2.67	1.82	4.99	6.12	0.681648	1.86891						0.166667		52.9662
	Eoraptor	Basalmost Theropoda	PVSJ 512	mx10	Smith & Lamanna, 2006	2.56	1.69	4.72	5.77	0.660156	1.84375						0.166667		53.5106
	Eoraptor	Basalmost Theropoda	PVSJ 512	mx02	Smith & Lamanna, 2006	2.94	1.87	5.32	6.2	0.636054	1.80952						0.166667		58.9909
	Eoraptor	Basalmost Theropoda	PVSJ 512	mx04	Smith & Lamanna, 2006	2.54	1.55	6.5	7.43	0.610236	2.55906						0.153846		59.059
	Eoraptor	Basalmost Theropoda	PVSJ 512	mx05	Smith & Lamanna, 2006	3.33	1.82	6.76	7.01	0.546547	2.03003						0.125		71.8652
	Eoraptor	Basalmost Theropoda	PVSJ 512	mx07	Smith & Lamanna, 2006	2.86	1.6	4.83	6.5	0.559441	1.68881						0.153846		43.2053
	Eoraptor	Basalmost Theropoda	PVSJ 512	mx08	Smith & Lamanna, 2006	2.8	1.5	4.71	5.97	0.535714	1.68214								50.4302
Ischisaurus	Ischisaurus	Basalmost Theropoda	MACN 18.060	pmx1	Hendrickx et al., 2015	8.16	4.7	14.62	17.01	0.57598	1.79167	5.51	3.44	0.624319	1	1			59.1912
	Ischisaurus	Basalmost Theropoda	MACN 18.060	pmx2	Hendrickx et al., 2015	7.48	4.43	14.5	17.14	0.592246	1.9385	5.53	4.15	0.750452	1	1	0.25		57.0462
	Eodromaeus	Basalmost Theropoda	PVSJ 561	mx3	Hendrickx et al., 2015	3.61	1.59	9.67	10.89	0.440443	2.67867	2.65	1.44	0.543396	1	1	0.117647		61.0027
Coelophysis	Coelophysis	Non-averostran Neotheropoda	CM 82931	pmx2	Hendrickx et al., 2015	1.7	0.54	4	4.8	0.317647	2.35294	1.2			1	1			52.5221
	Coelophysis	Non-averostran Neotheropoda	CM 82931	pmx3	Hendrickx et al., 2015	1.8	1.03	6.8	6.8	0.572222	3.77778	1.6			1	1			82.3944
	Coelophysis	Non-averostran Neotheropoda	CM 81765	mx1	Hendrickx et al., 2015	3	1.49	8.2	8.7	0.496667	2.73333	2.4			1	1	0.1		70.4706
	Coelophysis	Non-averostran Neotheropoda	CM 81765	mx2	Hendrickx et al., 2015	4.1	1.37	8.9	9.6	0.334146	2.17073	2.3			1	1	0.106383	0.1	67.7871
	Coelophysis	Non-averostran Neotheropoda	CM 81765	mx4	Hendrickx et al., 2015	4.4	1.63	11.6	12.3	0.370455	2.63636	4.1			1	1	0.125	0.125	70.5232
	Coelophysis	Non-averostran Neotheropoda	CM 81765	mx6	Hendrickx et al., 2015	5.5	1.71	9.7	10.8	0.310909	1.76364	3.1			1	1	0.125	0.125	63.6122
	Coelophysis	Non-averostran Neotheropoda	CM 81765	mx8	Hendrickx et al., 2015	5.9	1.79	9.3	13.2	0.30339	1.57627	2.8			1	1	0.125	0.125	38.1077
	Coelophysis	Non-averostran Neotheropoda	CM 81765	mx9	Hendrickx et al., 2015	5.4	1.74	8.6	11.6	0.322222	1.59259	2.9			1	1		0.125	44.2358
	Coelophysis	Non-averostran Neotheropoda	CM 81765	mx11	Hendrickx et al., 2015	5.4	1.85	7.5	10.1	0.342593	1.38889	3.7			1	1	0.142857	0.125	46.6199
	Coelophysis	Non-averostran Neotheropoda	CM 81765	mx13	Hendrickx et al., 2015	4.7	1.58	5.5	7.8	0.33617	1.17021	3			1	1	0.142857	0.135135	44.0697
	Coelophysis	Non-averostran Neotheropoda	CM 81765	mx14	Hendrickx et al., 2015	5.2	1.7	6.2	8.7	0.326923	1.19231	2.9			1	1	0.125	0.125	44.7208
	Coelophysis	Non-averostran Neotheropoda	CM 81765	mx15	Hendrickx et al., 2015	3.9	1.49	5.4	7.1	0.382051	1.38462	2.2			1	1	0.142857	0.125	48.8251
	Coelophysis	Non-averostran Neotheropoda	CM 81765	mx16	Hendrickx et al., 2015	3.3	1.14	5	6.2	0.345455	1.51515	2			1	1	0.125		53.5177
	Coelophysis	Non-averostran Neotheropoda	CM 81765	mx17	Hendrickx et al., 2015	3.5	1.63	4.1	6.6	0.465714	1.17143	2.1			1	1	0.142857	0.151515	32.4184
	Coelophysis	Non-averostran Neotheropoda	CM 81765	mx19	Hendrickx et al., 2015	3.35	1.86	3.3	3.7	0.555224	0.985075	1.8			1	1	0.125		55.5525
	Coelophysis	Non-averostran Neotheropoda	CM 81765	mx21	Hendrickx et al., 2015	3.54	0.93	3.45	5.21	0.262712	0.974576	1.4			1	1	0.125	0.142857	41.1551
	Coelophysis	Non-averostran Neotheropoda	CM 81765	mx22	Hendrickx et al., 2015	3.26	0.86	3.8	4.91	0.263804	1.16564	1.4			1	1	0.125		50.6557
	Coelophysis	Non-averostran Neotheropoda	CM 81765	dt1	Hendrickx et al., 2015	1.9	1.16	5.1	5.1	0.610526	2.68421	1.4			1	1			79.2646
	Coelophysis	Non-averostran Neotheropoda	CM 81765	dt3	Hendrickx et al., 2015	2.6	0.95	6.7	7.4	0.365385	2.57692	2.4			1	1	0.111111	0.142857	64.3945
	Coelophysis	Non-averostran Neotheropoda	CM 81765	dt4	Hendrickx et al., 2015	3.1	1.57	6.2	7.3	0.506452	2	2.3			1	1	0.125		57.2869
Dilophosaurus	Dilophosaurus	Non-averostran Neotheropoda	UCMP 37303	mx3	Smith et al., 2005	16.33	9.87	24.65	30	0.604409	1.50949						0.333333		55.2099
	Dilophosaurus	Non-averostran Neotheropoda	UCMP 37303	mx	Smith et al., 2005	16.35	10.2	28	33	0.623853	1.71254						0.357143		57.9695
	Dilophosaurus	Non-averostran Neotheropoda	UCMP 37303	mx	Smith et al., 2005	19.11	10.4	35.24	47.5	0.544218	1.84406						0.333333		40.5434
	Dilophosaurus	Non-averostran Neotheropoda	UCMP 37303	mx	Smith et al., 2005	17.33	10.14	25.66	31	0.585113	1.48067						0.357143		55.8672
Dracovenator	Dracovenator	Non-averostran Neotheropoda	BP/1/5243	pmx3	Young et al., 2019 (C.H. pers. measurements)	15.1	7.17	31.66	25.28	0.474834	2.09669	11.72	6.61	0.563993	1	1	0.384615		100.205
Liliensternus	Liliensternus	Non-averostran Neotheropoda	MBR 21751/4	mx	Smith et al., 2005	6.62	2.5	8.83	12.4	0.377644	1.33384						0.25	0.142857	43.2324
	Liliensternus	Non-averostran Neotheropoda	MBR 21751/3	mx	Smith et al., 2005	7.44	3	10.26	12.52	0.403226	1.37903						0.2	0.166667	55.0073
	Liliensternus	Non-averostran Neotheropoda	MBR 21751/8	d01	Smith et al., 2005	5.09	3.5	8.02	9.21	0.687623	1.57564						0.2	0.166667	60.3291
	Liliensternus	Non-averostran Neotheropoda	MBR 21751/8	d04	Smith et al., 2005	6.97	3.5	10.61	11.82	0.502152	1.52224						0.25	0.2	62.6416
	Liliensternus	Non-averostran Neotheropoda	MBR 21751/8	d15	Smith et al., 2005	8.34	3.5	10.53	12.62	0.419664	1.26259						0.25	0.2	55.9251
	Liliensternus	Non-averostran Neotheropoda	MBR 21751/8	d16	Smith et al., 2005	5.85	3	8.84	10.12	0.512821	1.51111						0.2	0.166667	60.3963
	Liliensternus	Non-averostran Neotheropoda	MBR 21751/9	?d19	Smith et al., 2005	6.63	2.5	11.23	12.92	0.377074	1.69382						0.166667	0.142857	60.3428
	Genyodectes	Non-abelisauroid Ceratosauria	MLP 26-39	mx1	Hendrickx et al., 2015	23.03	11.74	60.54	65.46	0.50977	2.62875				1	1	0.434783	0.47619	67.5724
	Genyodectes	Non-abelisauroid Ceratosauria	MLP 26-39	mx6	Hendrickx et al., 2015	27.51	9.15	50.73	62.12	0.332606	1.84406	23.32	9.06	0.388508	1	1	0.4		53.3089
	Genyodectes	Non-abelisauroid Ceratosauria	MLP 26-39	dt2	Hendrickx et al., 2015	17.2	11.3	43.65	44.13	0.656977	2.53779	16.44	8.7	0.529197	1	1	0.454545		77.1362
	Genyodectes	Non-abelisauroid Ceratosauria	MLP 26-39	dt4	Hendrickx et al., 2015	22.27	7.16	52.84	58.52	0.321509	2.3727				1	1		0.333333	64.345
	Genyodectes	Non-abelisauroid Ceratosauria	MLP 26-39	dt1	Hendrickx et al., 2015	13.84	9.05	28.75	35.85	0.653902	2.07731				1	1	0.37037		49.0627
	Genyodectes	Non-abelisauroid Ceratosauria	MLP 26-39	dt2	Hendrickx et al., 2015	16.61	11.21	34.33	39.53	0.674895	2.06683	14.47	9.43	0.651693	1	1	0.384615	0.333333	59.83
	Genyodectes	Non-abelisauroid Ceratosauria	MLP 26-39	dt3	Hendrickx et al., 2015	21.48	12.57	46.02	46.26	0.585196	2.14246	18.79	10.13	0.539117	1	1	0.434783	0.428816	75.918
	Genyodectes	Non-abelisauroid Ceratosauria	MLP 26-39	dt5	Hendrickx et al., 2015	18.88	10.57	37.82	45.43	0.559852	2.00318	16.85	9.04	0.536499	1	1	0.384615	0.47619	54.7528
	Genyodectes	Non-abelisauroid Ceratosauria	MLP 26-39	dt7	Hendrickx et al., 2015	19.91	10.32	41.69	42.78	0.518332	2.09392	18.16	9.86	0.542952	1	1	0.416667	0.4	73.3365
Ceratosaurus	Ceratosaurus	Non-abelisauroid Ceratosauria	NMNH 4735	dt7	Hendrickx et al., 2015	19	6.5	34.8	40.9	0.342105	1.83158	14.8	6.4	0.432432	1	1	0.384615	0.4	58.0361
	Ceratosaurus	Non-abelisauroid Ceratosauria	NMNH 4735	dt9	Hendrickx et al., 2015	18.4	7.3	32.3	39.6	0.396739	1.75543	15.6	7.5	0.480769	1	1	0.375094	0.4	53.6658
	Ceratosaurus	Non-abelisauroid Ceratosauria	NMNH 4735	dt10	Hendrickx et al., 2015	18.1	7.5	34.5	38.3	0.414365	1.90608	15	6.4	0.426667	1	1			64.1624
	Ceratosaurus	Non-abelisauroid Ceratosauria	NMNH 4735	dt6	Hendrickx et al., 2015	17.4	8.8	34.6	38.8	0.505747	1.98851	14.3	8.1	0.566434	1	1	0.434783	0.5	63.0931
	Ceratosaurus	Non-abelisauroid Ceratosauria	NMNH 4735	dt12	Hendrickx et al., 2015	15	8	28.3	29.4	0.533333	1.88667	12.7	5.7	0.448819	1	1	0.4	0.444444	70.9094
	Ceratosaurus	Non-abelisauroid Ceratosauria	NMNH 4735	dt13	Hendrickx et al., 2015	14.9	6.7	25.4	26.9	0.449664	1.7047	6.8	5	0.735294	1	1		0.416667	67.9871
	Ceratosaurus	Non-abelisauroid Ceratosauria	BYU 881 12893	mx3	Young et al., 2019 (C.H. pers. measurements)	30.03	11.42	62.47	77.05	0.380286	2.08025	24.24	10.09	0.416254	1	1	0.555556	0.571429	50.6207
	Ceratosaurus	Non-abelisauroid Ceratosauria	BYU 881 12893	mx7	Young et al., 2019 (C.H. pers. measurements)	27.52	9.75	59.96	66.32	0.354288	2.17878	22.21	8.53	0.384061	1	1	0.484027	0.5	64.6909
	Ceratosaurus	Non-abelisauroid Ceratosauria	UMNH VP 5278 (= UMNH VP 7819 of Smith, 2005)	pm01	Young et al., 2019 (C.H. pers. measurements)	24.2	14.53	34.03	39.37	0.600413	1.4062	13.99	11.78	0.84203	1	5	0.625		59.1337
	Ceratosaurus	Non-abelisauroid Ceratosauria	UMNH VP 5278 (= UMNH VP 7819 of Smith, 2005)	pm02	Young et al., 2019 (C.H. pers. measurements)	22.32	17.46	40.19	44.38	0.782258	1.80063	16.48	15.19	0.921723	1	4	0.588235	0.4	64.5117
	Ceratosaurus	Non-abelisauroid Ceratosauria	UMNH VP 5278 (= UMNH VP 7819 of Smith, 2005)	pm03	Young et al., 2019 (C.H. pers. measurements)	23.5	14.33	44.09	48.33	0.609787	1.87617	17.42	12.34	0.708381	1	8	0.60024	0.333333	65.4409
	Ceratosaurus	Non-abelisauroid Ceratosauria	UMNH VP 5278 (= UMNH VP 7819 of Smith, 2005)	pm01	Young et al., 2019 (C.H. pers. measurements)	19.73	14.21	35.93	37.78	0.720223	1.82108	14.33	12.09	0.843685	1	5	0.60024	0.444444	69.3544
	Ceratosaurus	Non-abelisauroid Ceratosauria	UMNH VP 5278 (= UMNH VP 7819 of Smith, 2005)	pm03	Young et al., 2019 (C.H. pers. measurements)	21.96	14.47	40.9	45.1	0.658925	1.86248	17.04	11.48	0.673709	1	7	0.625	0.428816	64.798
	Ceratosaurus	Non-abelisauroid Ceratosauria	UMNH VP 5278	mx03	Young et al., 2019 (C.H. pers. measurements)	31.11	13.27	66.46	75.08	0.426551	2.13629	24.93	11.83	0.474529	1	1	0.444444	0.434783	62.0725
	Ceratosaurus	Non-abelisauroid Ceratosauria	UMNH VP 5278	mx05	Young et al., 2019 (C.H. pers. measurements)	33.8	11.95	72.84	81.37	0.35355	2.15503	29.25	12.79	0.437265	1	1	0.454545	0.461681	63.4594
	Ceratosaurus	Non-abelisauroid Ceratosauria	UMNH VP 5278	mx08	Young et al., 2019 (C.H. pers. measurements)	27.46	8.68	54.13	57.42	0.316096	1.97123	23.56	9.06	0.38455	1	1	0.454545	0.434783	69.1763
	Ceratosaurus	Non-abelisauroid Ceratosauria	UMNH VP 5278	mx10	Young et al., 2019 (C.H. pers. measurements)	20.98	9.73	41.42	43.3	0.463775	1.97426	18.03	8.11	0.449806	1	1	0.428816	0.384615	70.7356
	Ceratosaurus	Non-abelisauroid Ceratosauria	UMNH VP 5278	dt2	Young et al., 2019 (C.H. pers. measurements)	18.61	14.28	32.26	27.45	0.767329	1.73348	14.1	9.95	0.705674	1	5	0.5	0.384615	86.6823
	Ceratosaurus	Non-abelisauroid Ceratosauria	UMNH VP 5278	dt8	Young et al., 2019 (C.H. pers. measurements)	21.99	9.21	39.16	40.41	0.418827	1.78081	18.55	8.35	0.450135	1	1	0.416667	0.416667	70.8495
	Ceratosaurus	Non-abelisauroid Ceratosauria	UMNH VP 5278	dt9	Young et al., 2019 (C.H. pers. measurements)	17.62	7.38	30.29	30.1	0.418842	1.71907	14.62	6.91	0.47264	1	1	0.428816	0.4	73.6279
	Ceratosaurus	Non-abelisauroid Ceratosauria	UMNH VP 5278 (= UMNH VP 7819 of Smith, 2005)	pm01	Smith et al., 2005	25.86	14.79	31.63	41.28	0.571926	1.22312						0.625		50.0011
	Ceratosaurus	Non-abelisauroid Ceratosauria	UMNH VP 5278 (= UMNH VP 7819 of Smith, 2005)	pm02	Smith et al., 2005	23	16.81	41.89	43.74	0.73087	1.8213						0.625		70.0225
	Ceratosaurus	Non-abelisauroid Ceratosauria	UMNH VP 5278 (= UMNH VP 7819 of Smith, 2005)	pm03	Smith et al., 2005	24.04	14.88	41.66	48.6	0.618968	1.73295						0.555556	0.625	58.9759
	Ceratosaurus	Non-abelisauroid Ceratosauria	UMNH VP 5278 (= UMNH VP 7819 of Smith, 2005)	pm01	Smith et al., 2005	20.26	14.31	38.69	41.36	0.706318	1.90967						0.625		68.1329
	Ceratosaurus	Non-abelisauroid Ceratosauria	UMNH VP 5278 (= UMNH VP 7819 of Smith, 2005)	pm03	Smith et al., 2005	22.64	13.9	39.65	48.11	0.613958	1.75133						0.714286	0.555556	54.8223
	Ceratosaurus	Non-abelisauroid Ceratosauria	UMNH VP 5278	mx01	Smith et al., 2005	25.47	15.1	51.32	56.11	0.592854	2.01492						0.555556	0.555556	65.9834
	Ceratosaurus	Non-abelisauroid Ceratosauria	UMNH VP 5278	mx03	Smith et al., 2005	29.61	12.88	61.71	72.86	0.434988	2.08409						0.5	0.454545	56.568
	Ceratosaurus	Non-abelisauroid Ceratosauria	UMNH VP 5278	mx05	Smith et al., 2005	32.95	14	75	84.46	0.424886	2.27618						0.454545	0.390625	62.2195
	Ceratosaurus	Non-abelisauroid Ceratosauria	UMNH VP 5278	mx08	Smith et al., 2005	27.52	10.53	52.38	61.54	0.382631	1.90334						0.416667	0.357143	57.8815
	Ceratosaurus	Non-abelisauroid Ceratosauria	UMNH VP 5278	mx10	Smith et al., 2005	20.79	9.12	38.11	42.69	0.438672	1.83309						0.47619	0.416667	63.1292
Berberosaurus	Berberosaurus	Non-abelisauroid Ceratosauria	MNHN Pt369	Isolated	Hendrickx et al., 2015	17.8	6.4	32.3	38.4	0.359551	1.81461	11.7	5.3	0.452991	1	1	0.333333	0.277778	56.8216
	Berberosaurus	Non-abelisauroid Ceratosauria	MNHN Pt369	Isolated	Hendrickx et al., 2015	18.6	9.1	41.8	46.8	0.489247	2.24731	14.2	7	0.492958	1	1	0.37037	0.37594	63.0524
	Noasaurus	Noasauridae	PVL 4061	mx6	Hendrickx et al., 2015	3.11	1.84	3.33	4.24	0.59164	1.07074				1	1	0.25		51.101
	Noasaurus	Noasauridae	PVL 4061	mx8	Hendrickx et al., 2015	3.04	1.81	4.98	5.91	0.595395	1.63816	2.24	1.32	0.589286	1	1	0.2	0.153846	57.3815
Masiakasaurus	Masiakasaurus	Noasauridae	UA 9128 (most mesial tooth)	Isolated, mesial	Hendrickx et al., 2015	2.44	2.63	7.71	6.32	1.07787	3.15984	2.76	2.28	0.826087	1	1			116.058
	Masiakasaurus	Noasauridae	FMNH PR 2696 (small)	Isolated, mesial	Hendrickx et al., 2015	2.24	2.54	6.64	6.49	1.13393	2.96429	2.51	1.95	0.776892	1	6	0.142857		83.9823
	Masiakasaurus	Noasauridae	FMNH PR 2182	Isolated, mesial	Hendrickx et al., 2015	2.32	2.21	6.1	6.49	0.952586	2.62931	2.14	1.57	0.733645	1	3	0.125	0.125	70.0141
	Masiakasaurus	Noasauridae	FMNH PR 2471	dt1	Hendrickx et al., 2015	2.79	3.48	7.7	7.94	1.24731	2.75986	3.1	2.42	0.780645	1	4	0.166667	0.142857	74.9054
	Masiakasaurus	Noasauridae	UA 8680	dt4	Hendrickx et al., 2015	2.86	2.04	6.23	5.96	0.713287	2.17832	2.04	2.46	1.20588	1	6	0.125	0.142857	81.756
	Masiakasaurus	Noasauridae	UA 8680	dt6	Hendrickx et al., 2015	3.04	1.85	4.76	4.3	0.608553	1.56579	1.86	1.4	0.752688	1	2	0.125		78.8091
	Masiakasaurus	Noasauridae	FMNH PR 2221	Isolated	Hendrickx et al., 2015	5.06	2.04	8.71	10.06	0.403162	1.72134	3.94	1.77	0.449239	1	1	0.272777	0.181818	59.9743
	Masiakasaurus	Noasauridae	FMNH PR 2476	Isolated	Hendrickx et al., 2015	2.41	1.29	4.58	4.77	0.53527	1.90041	2.3	1.3	0.565217	1	1	0.125		70.738
	Masiakasaurus	Noasauridae	FMNH PR 2201	Isolated	Hendrickx et al., 2015	6.27	3.14	11.39	13.74	0.500797	1.81659	4.55	2.36	0.518681	1	1	0.333333	0.25	55.186
	Masiakasaurus	Noasauridae	UA 9091	Isolated	Hendrickx et al., 2015	2.76	1.37	4.34	5.45	0.496377	1.57246	2.3	1.11	0.482609	1	1	0.142857	0.1	52.0895
	Masiakasaurus	Noasauridae	FMNH PR 2696 (big)	Isolated	Hendrickx et al., 2015	4.64	2.45	11.84	11.36	0.528017	2.55172	3.68	2.14	0.581522	1	1	0.333333	0.25	84.3419
	Masiakasaurus	Noasauridae	98312-1	Isolated	Smith et al., 2005	4.47	3.93	7.46	8.59	0.879195	1.6689						0.344828	0.294118	60.2408
	Masiakasaurus	Noasauridae	95345-1	Isolated	Smith et al., 2005	5.3	2.28	6.96	8.18	0.430189	1.31321						0.2	0.166667	57.5214
	Masiakasaurus	Noasauridae	99016	Isolated	Smith et al., 2005	6.15	3.02	14.25	13.51	0.491057	2.31707						0.222222	0.2	84.0311
	Masiakasaurus	Noasauridae	95358	Isolated	Smith et al., 2005	2.81	2.2	5.87	6	0.782918	2.08897								73.744
	Masiakasaurus	Noasauridae	95244-1	Isolated	Smith et al., 2005	3.27	1.93	6.52	6.83	0.590214	1.99388								70.6077
	Masiakasaurus	Noasauridae	98313-1	Isolated	Smith et al., 2005	7.09	3.48	10.44	11.67	0.490832	1.4725						0.27027	0.285714	62.0882
	Masiakasaurus	Noasauridae	98203	Isolated	Smith et al., 2005	4.62	2.5	11.64	12.14	0.541126	2.51948						0.333333	0.166667	72.7659
	Masiakasaurus	Noasauridae	93086-4	Isolated	Smith et al., 2005	4.94	2.42	8.58	9.49	0.489879	1.73684						0.25		64.1732
	Masiakasaurus	Noasauridae	95435	Isolated	Smith et al., 2005	4.94	2.42	6.8	8.2	0.489879	1.37652						0.25	0.222222	55.9146
	Masiakasaurus	Noasauridae	96068-4	Isolated	Smith et al., 2005	5.47	2.22	8.86	10.15	0.40585	1.61974						0.299401	0.190114	60.6395
Arcovenator	Arcovenator	Abelisauridae	MHNA.PV.2011.12.15 (holotype)	Isolated	Young et al., 2019 (C.H. pers. measurements)	15.11	8.79	34.98	34.04	0.581734	2.31502	13.05	8.19	0.627586	1	1	0.416667	0.333333	80.8584
	Arcovenator	Abelisauridae	MHNA.PV.2011.12.187 (referred)	Isolated	Young et al., 2019 (C.H. pers. measurements)	19.82	9.55	46.37	48.96	0.481837	2.33956	16.22	8.52	0.525277	1	1	0.4	0.307692	70.7537
	Abelisaurus	Abelisauridae	MC 1	Isolated	Hendrickx et al., 2015	9.11	5.61	14.18	15.48	0.615807	1.55653	7.7	4.24	0.550649	1	1	0.416667	0.454545	64.4716
	Abelisaurus	Abelisauridae	MC 5	Isolated	Hendrickx et al., 2015	11.58	6.88	22.61	23.41	0.594128	1.9525	10.52	5.2	0.494297	1	1	0.5	0.47619	71.625
	Abelisaurus	Abelisauridae	MC 267	Isolated	Hendrickx et al., 2015	9.2	4.81	11.21	12.88	0.522826	1.21848	7.29	3.76	0.515775	1	1	0.5	0.5	58.204
	Abelisaurus	Abelisauridae	MC 689 (sure, see photo of F. Novas)	Isolated	Hendrickx et al., 2015	19.55	9.38	24.28	26.61	0.479795	1.24194	12.79	8.74	0.683346	1	1	0.5	0.47619	61.2292
	Abelisaurus	Abelisauridae	MC 709 (230)	Isolated	Hendrickx et al., 2015	17.06	9.82	24.08	28.07	0.575615	1.41149	14.29	8.05	0.563331	1	1	0.384615	0.333333	58.5912
Rugops	Rugops	Abelisauridae	MNN IGU1	mx4	Smith & Lamanna, 2006	11.63	4.56	13.23	17.24	0.392089	1.13758						0.416667		50.0592
Indosuchus	Indosuchus	Abelisauridae	AMNH 1753	pmx1	Hendrickx et al., 2015	12.9	12.9	20	24.1	1	1.55039	11.9	10.4	0.87395	1	1	0.750751	0.666667	56.0528
	Indosuchus	Abelisauridae	AMNH 1753	pmx2	Hendrickx et al., 2015	16	13.2	30	31	0.825	1.875	14	9.8	0.7	1	1	0.555556	0.555556	71.3639
	Indosuchus	Abelisauridae	AMNH 1753	pmx3	Hendrickx et al., 2015	16	10	27	29	0.625	1.6875	14.1	8.7	0.617021	1	1	0.5	0.588235	66.6372
	Indosuchus	Abelisauridae	AMNH 1753	pmx4	Hendrickx et al., 2015	16.6	13.3	29.1	36	0.801205	1.75301	15.1	9.8	0.649007	1	1	0.588235	0.571429	52.6715
	Indosuchus	Abelisauridae	AMNH 1753	mx08	Smith et al., 2005	19.47	9.1	29.4	31.5	0.467386	1.51002						0.416667	0.5	65.587
	Indosuchus	Abelisauridae	AMNH 1753	pm02	Smith et al., 2005	17.3	12.99	26.9	28.5	0.750867	1.55491						0.454545	0.434783	66.8339
	Indosuchus	Abelisauridae	AMNH 1753	pm03	Smith et al., 2005	16.59	10.66	27.26	29.48	0.642556	1.64316							0.5	65.7855
	Indosuchus	Abelisauridae	AMNH 1753	pm04	Smith et al., 2005	17.33	12.85	28.02	32.05	0.741489	1.61685								60.7722
	Indosuchus	Abelisauridae	AMNH 1753	pm01	Smith et al., 2005	13.55	10.54	26	29	0.77786	1.91882							0.625	63.668
	Indosuchus	Abelisauridae	AMNH 1753	pm02	Smith et al., 2005	15.99	11.96	31.86	32.01	0.747967	1.9925						0.5	0.625	74.9819
Chenanisaurus	Chenanisaurus	Abelisauridae	OCP 457	Isolated, pm	Longrich et al., 2017	20.6	14.3	44.1	47.2	0.694175	2.14078						0.625	0.625	68.6685
	Chenanisaurus	Abelisauridae	OCP 458	Isolated, pm	Longrich et al., 2017	20	15.2	42.6	42.8	0.76	2.13								75.8996
	Chenanisaurus	Abelisauridae	WDC-CCPM-005	Isolated, lateral (measurements taken with ImageJ)	Buffetaut et al., 2005	19	10	39	41.5	0.526316	2.05263						0.5	0.5	69.1127
Majungasaurus	Majungasaurus	Abelisauridae	FMNH PR 2100	pm01	Young et al., 2019 (C.H. pers. measurements)	12.16	10.94	19.64	21.41	0.899671	1.61513	9.11	6.73	0.738749	1	1	0.588235	0.714286	64.9429
	Majungasaurus	Abelisauridae	FMNH PR 2100	pm02	Young et al., 2019 (C.H. pers. measurements)	15.01	12.45	27.85	26.65	0.829447	1.85543	12.01	7.98	0.664446	1	1	0.588235	0.666667	78.4708
	Majungasaurus	Abelisauridae	FMNH PR 2100	pm03	Young et al., 2019 (C.H. pers. measurements)	15.3	8.79	23.85	23.25	0.57451	1.55882	10.3	6.94	0.673786	1	1	0.666667	0.666667	73.1833
	Majungasaurus	Abelisauridae	FMNH PR 2100	pm04	Young et al., 2019 (C.H. pers. measurements)	14.9	8.32	31.8	20.94	0.558389	2.13423	12.18	7.89	0.647783	1	1	0.625	0.714286	124.2
	Majungasaurus	Abelisauridae	FMNH PR 2100	mx04	Young et al., 2019 (C.H. pers. measurements)	17.93	9.16	33.41	37.23	0.510876	1.86336	15.63	8.17	0.522713	1	1	0.526316	0.540541	63.7096
	Majungasaurus	Abelisauridae	FMNH PR 2100	mx06	Young et al., 2019 (C.H. pers. measurements)	18.13	9.39	35.08	37.74	0.517926	1.93491	15.54	7.6	0.48906	1	1	0.555556	0.526316	67.5583
	Majungasaurus	Abelisauridae	FMNH PR 2100	mx05	Young et al., 2019 (C.H. pers. measurements)	18.7	8.4	30.98	37.87	0.449198	1.65668	14.87	7.44	0.500336	1	1	0.625	0.588235	54.4207
	Majungasaurus	Abelisauridae	FMNH PR 2100	mx07	Young et al., 2019 (C.H. pers. measurements)	18.47	8.9	34.86	38.93	0.481862	1.88738	15.08	7.22	0.47878	1	1	0.588235	0.555556	63.5089
	Majungasaurus	Abelisauridae	FMNH PR 2100	d01	Young et al., 2019 (C.H. pers. measurements)	8.56	7.34	14.8	15.38	0.857477	1.72897	6.75	5.03	0.745185	1	1	0.588235	0.625	69.8327
	Majungasaurus	Abelisauridae	FMNH PR 2100	d05	Young et al., 2019 (C.H. pers. measurements)	13.1	8.91	27.14	30.32	0.680153	2.07176	12.25	6.85	0.559184	1	1	0.526316	0.545852	63.5096
	Majungasaurus	Abelisauridae	FMNH PR 2100	d07	Young et al., 2019 (C.H. pers. measurements)	13.9	7.58	24.4	27.98	0.545324	1.7554	11.89	6.14	0.5164	1	1	0.5	0.526316	60.6943
	Majungasaurus	Abelisauridae	FMNH PR 2100	d12	Young et al., 2019 (C.H. pers. measurements)	12.56	6.77	20.95	25.33	0.539013	1.66799	11.36	5.58	0.491197	1	1	0.5	0.5	55.4933
	Majungasaurus	Abelisauridae	FMNH PR 2100	d13	Young et al., 2019 (C.H. pers. measurements)	12.27	6.45	19.84	23.61	0.525672	1.61695	11.29	5.42	0.480071	1	1	0.5	0.428816	57.1412
	Majungasaurus	Abelisauridae	FMNH PR 2100	d14	Young et al., 2019 (C.H. pers. measurements)	11.73	5.99	18.08	25.8	0.510656	1.54135	11.56	5.46	0.472318	1	1	0.47081		38.0939
	Majungasaurus	Abelisauridae	FMNH PR 2100	d15	Young et al., 2019 (C.H. pers. measurements)	11.49	5.89	18.57	20.86	0.51262	1.61619	10.63	5.1	0.479774	1	1	0.444444	0.428816	62.3693
	Majungasaurus	Abelisauridae	FMNH PR 2100	d02	Young et al., 2019 (C.H. pers. measurements)	10.79	8.22	22.91	22.16	0.761816	2.12326	9.38	6.35	0.676972	1	1	0.625	0.625	80.051
	Majungasaurus	Abelisauridae	FMNH PR 2100	d03	Young et al., 2019 (C.H. pers. measurements)	13.02	8.38	22.86	24.03	0.643625	1.75576	10.78	6.11	0.56679	1	1	0.555556	0.555556	68.9866
	Majungasaurus	Abelisauridae	FMNH PR 2100	d04	Young et al., 2019 (C.H. pers. measurements)	14.63	7.85	23.03	23.85	0.536569	1.57416	11.21	5.76	0.513827	1	1	0.555556	0.533333	68.7896
	Majungasaurus	Abelisauridae	FMNH PR 2100	d05	Young et al., 2019 (C.H. pers. measurements)	14.22	7.87	21.53	24.52	0.553446	1.51406	10.77	5.57	0.517177	1	1	0.526316	0.60024	60.8292
	Majungasaurus	Abelisauridae	FMNH PR 2100	d06	Young et al., 2019 (C.H. pers. measurements)	13.67	7.82	24.99	27.11	0.572056	1.82809	11.25	5.76	0.512	1	1	0.5	0.526316	66.3505
	Majungasaurus	Abelisauridae	FMNH PR 2100	d10	Young et al., 2019 (C.H. pers. measurements)	12.96	8.45	24.57	28.1	0.652006	1.89583	12.36	6.8	0.550162	1	1	0.5	0.461681	60.9303
	Majungasaurus	Abelisauridae	FMNH PR 2100	d11	Young et al., 2019 (C.H. pers. measurements)	12.82	6.94	22.76	28.16	0.541342	1.77535	12.13	6.29	0.518549	1	1	0.47619	0.454545	52.5219
	Majungasaurus	Abelisauridae	FMNH PR 2100	d15	Young et al., 2019 (C.H. pers. measurements)	11.07	6.07	18.78	20.72	0.548329	1.69648	10.34	4.99	0.482592	1	1	0.428816	0.428816	64.267
	Majungasaurus	Abelisauridae	FMNH PR2008	pm02	Smith et al., 2005	12.99	9.46	30.11	31.92	0.728253	2.31794						0.416667	0.454545	70.1923
	Majungasaurus	Abelisauridae	UA 8716	pm02	Smith et al., 2005	12.41	9.26	27.05	27.84	0.746172	2.17969						0.5	0.5	73.4031
	Majungasaurus	Abelisauridae	UA 8716	pm04	Smith et al., 2005	12.51	8.3	27.69	30.73	0.663469	2.21343						0.454545	0.5	64.2444
	Majungasaurus	Abelisauridae	FMNH PR2100	pm01	Smith et al., 2005	12.08	11.09	31.52	33.67	0.918046	2.60927						0.555556	0.588235	69.4095
	Majungasaurus	Abelisauridae	FMNH PR2100	mx02	Smith et al., 2005	16.76	9.85		33.18	0.587709							0.555556	0.588235
	Majungasaurus	Abelisauridae	FMNH PR2100	mx04	Smith et al., 2005	18.3	8.62	36.9	39.33	0.471038	2.01639						0.555556	0.588235	68.818
	Majungasaurus	Abelisauridae	FMNH PR2100	mx06	Smith et al., 2005	18.37	9.21	38.08	39.87	0.501361	2.07295						0.555556	0.526316	70.9964
	Majungasaurus	Abelisauridae	FMNH PR2100	mx01	Smith et al., 2005	14.57	6.64		31.74	0.455731							0.555556	0.588235
	Majungasaurus	Abelisauridae	FMNH PR2100	mx05	Smith et al., 2005	18.93	8.86	35.54	41.69	0.46804	1.87744						0.5	0.5	58.1329
	Majungasaurus	Abelisauridae	FMNH PR2100	mx07	Smith et al., 2005	18.17	9.1	38.68	44.19	0.500826	2.12878						0.555556	0.515464	60.664
	Majungasaurus	Abelisauridae	FMNH PR2100	mx09	Smith et al., 2005	16.34	6.54	29.36	31.77	0.400245	1.79682						0.526316	0.5	66.4807
	Majungasaurus	Abelisauridae	FMNH PR2100	mx17	Smith et al., 2005	7.88	3.47	12.45	13.8	0.440355	1.57995						0.357143	0.416667	63.3559
	Majungasaurus	Abelisauridae	FMNH PR2100	d01	Smith et al., 2005	8.81	7.2	19.88	19.88	0.817253	2.25653						0.555556	0.555556	77.1982
	Majungasaurus	Abelisauridae	FMNH PR2100	d05	Smith et al., 2005	13.3	8.56	25.37	29.45	0.643609	1.90752						0.526316	0.454545	59.248
	Majungasaurus	Abelisauridae	FMNH PR2100	d07	Smith et al., 2005	14.24	7.72	25.13	27.86	0.542135	1.76475						0.454545	0.454545	64.031
	Majungasaurus	Abelisauridae	FMNH PR2100	d12	Smith et al., 2005	12.66	7.12	19.93	23.79	0.562401	1.57425						0.5	0.416667	56.8905
	Majungasaurus	Abelisauridae	FMNH PR2100	d13	Smith et al., 2005	12.53	6.69	19.21	24.31	0.533919	1.53312						0.454545	0.416667	51.5346
	Majungasaurus	Abelisauridae	FMNH PR2100	d14	Smith et al., 2005	12.28	6.7	17.87	23.41	0.545603	1.45521						0.454545	0.416667	48.6971
	Majungasaurus	Abelisauridae	FMNH PR2100	d15	Smith et al., 2005	11.72	6.29	16.19	21.48	0.536689	1.3814						0.454545	0.384615	48.0411
	Majungasaurus	Abelisauridae	FMNH PR2100	d17	Smith et al., 2005	9.33	5.36	14.48	17.93	0.574491	1.55198						0.454545	0.333333	53.5317
	Majungasaurus	Abelisauridae	FMNH PR2100	d02	Smith et al., 2005	10.91	8.48	22.88	20.82	0.777269	2.09716						0.588235	0.625	86.3392
	Majungasaurus	Abelisauridae	FMNH PR2100	d03	Smith et al., 2005	13.53	8.27	22.87	25.98	0.611234	1.69032						0.555556	0.526316	61.5433
	Majungasaurus	Abelisauridae	FMNH PR2100	d04	Smith et al., 2005	13.9	7.7	24.08	26.12	0.553957	1.73237						0.5	0.526316	65.9765
	Majungasaurus	Abelisauridae	FMNH PR2100	d06	Smith et al., 2005	13.5	7.77	25.75	27.54	0.575556	1.90741						0.454545	0.526316	68.0757
	Majungasaurus	Abelisauridae	FMNH PR2100	d10	Smith et al., 2005	12.82	8.59	23.76	27.65	0.670047	1.85335						0.5	0.454545	59.0751
	Majungasaurus	Abelisauridae	FMNH PR2100	d11	Smith et al., 2005	13.17	7.05	23	26.02	0.535308	1.74639						0.526316	0.454545	62.0256
	Majungasaurus	Abelisauridae	FMNH PR2100	d15	Smith et al., 2005	11.26	5.79	18.73	22.49	0.51421	1.66341						0.416667	0.416667	56.1966
	Majungasaurus	Abelisauridae	FMNH PR2100	d16	Smith et al., 2005	12.88	5.25	18.71	23.06	0.407609	1.45264						0.416667	0.416667	54.1864
	Majungasaurus	Abelisauridae	FMNH PR2278	mx02	Smith et al., 2005	16.9	8.67	37.63	40.16	0.513018	2.22663						0.537634	0.5	69.1822
	Majungasaurus	Abelisauridae	FMNH PR2278	mx03	Smith et al., 2005	17.1	8.81	35.01	41.03	0.515205	2.04737						0.5	0.416667	57.6829
Aucasaurus	Aucasaurus	Abelisauridae	MCF-PVPH-236	Isolated	Hendrickx et al., 2015	17.98	11.29	36.37	37.77	0.62792	2.0228	13.37	7.24	0.541511	1	1	0.333333	0.384615	71.6729
	Aucasaurus	Abelisauridae	MCF-PVPH-236	mx last	Hendrickx et al., 2015	14.63	4.45	18.41	23.67	0.30417	1.25837	10.94	4.77	0.436015	1	1	0.4	0.37037	51.051
	Skorpiovenator	Abelisauridae	MMCH-PV 48	Most mesial - Isolated pmx?	Hendrickx et al., 2015	13.55	8.46	28.14	27.69	0.624354	2.07675	11.87	6.31	0.531592	1	1		0.364964	77.8077
	Skorpiovenator	Abelisauridae	MMCH-PV 48	Lateral - Isolated mx?	Hendrickx et al., 2015	18.76	6.68	41	43	0.356077	2.1855	14.25	6.82	0.478596	1	1	0.384615	0.357143	71.1997
Carnotaurus	Carnotaurus	Abelisauridae	MACN-CH 894	dt3	Hendrickx et al., 2015	13.93	9.94	30.13	30.57	0.713568	2.16296				1	1			74.9776
	Carnotaurus	Abelisauridae	MACN-CH 894	dt6	Hendrickx et al., 2015	15.02	8.9	33.15	30.16	0.592543	2.20706				1	1			87.7036
	Carnotaurus	Abelisauridae	MACN-CH 894	dt10	Hendrickx et al., 2015	13.53	8.78	27.03	29.25	0.648928	1.99778				1	1			67.0993
	Carnotaurus	Abelisauridae	MACN-CH 894	dt11	Hendrickx et al., 2015	11.82	7.75	22.17	27.78	0.655668	1.87563				1	1			50.25
Abelisauridae	Abelisauridae	Abelisauridae	MUCPv 641	Isolated	Hendrickx et al., 2015	10.95	4.6	19.25	22.56	0.420091	1.75799	8.99	4.18	0.464961	1	1	0.434783	0.416667	58.4802
	Abelisauridae	Abelisauridae	MUCPv 482	Isolated	Hendrickx et al., 2015	10.5	4.18	19.55	18.8	0.398095	1.8619	9.08	3.97	0.437225	1	1	0.380952	0.333333	78.0884
	Abelisauridae	Abelisauridae	MHNA.PV.2008.1.43	Isolated	Young et al., 2019 (C.H. pers. measurements)	13.31	8.81	36.78	37.18	0.661908	2.76334	12.89	6.6	0.512025	1	1		0.333333	77.943
	Abelisauridae	Abelisauridae	MHNA.PV.2011.12.7	Isolated	Young et al., 2019 (C.H. pers. measurements)	13.43	7.25	34.27	32.25	0.539836	2.55175	12.7	6.08	0.47874	1	1	0.444444		86.9563
	Abelisauridae	Abelisauridae	NHM R4190 ("Massospondylus rawesi" of Lydekker, 1890)	Isolated	Young et al., 2019 (C.H. pers. measurements)	15.36	7.35	24.67	27.45	0.478516	1.60612	13	6.01	0.462308	1	1	0.5	0.588235	63.1532
	Abelisauridae	Abelisauridae	MACN 18172 ("Megalosaurus inexpectatus" Del Corro, 1965)	Isolated	Young et al., 2019 (C.H. pers. measurements)	12.13	5.68	27.04	28.88	0.468261	2.22918	8.79	3.95	0.449374	1	1			69.0922
	Abelisauridae	Abelisauridae	UCPC 10	mx6	Hendrickx et al., 2015	11.4	6.1	22	26	0.535088	1.92982	8.7	4.9	0.563218	1	1	0.384615	0.4	57.1039
	Abelisauridae	Abelisauridae	UCPC 10	mx6	Smith & Lamanna, 2006	13.43	6.53	23.8	25.78	0.486225	1.77215							0.416667	66.2815
	Abelisauridae	Abelisauridae	MGUP MEGA002	Isolated	Smith & Lamanna, 2006	13.01	6.69	16.63	20.97	0.51422	1.27825						0.384615	0.5	52.4629
	Abelisauridae	Abelisauridae	MCPM 13693	Isolated	Smith & Vechia, 2006	16.2	9.8	27.5	29.5	0.604938	1.69753								66.8058
Monolophosaurus	Monolophosaurus	Non-megalosauran Megalosauroidea	IVPP 84019	pmx4	Hendrickx et al., 2020	15.36	11.01	33.7	33.21	0.716797	2.19401	11.68	8.35	0.714897	1	1	0.285714		78.5145
	Monolophosaurus	Non-megalosauran Megalosauroidea	IVPP 84019	mx2	Hendrickx et al., 2020	19.36	9.89	41.51	46.8	0.510847	2.14411	14.06	8.07	0.573969	1	1	0.3125	0.333333	62.3132
	Monolophosaurus	Non-megalosauran Megalosauroidea	IVPP 84019	mx9	Hendrickx et al., 2020	15.95	5.76	17.71	28.85	0.361129	1.11034				1	1	0.333333	0.333333	32.858
	Monolophosaurus	Non-megalosauran Megalosauroidea	IVPP 84019	dt7	Hendrickx et al., 2020	13.66	6.17	25.05	28.44	0.451684	1.83382				1	1	0.285714	0.285714	61.7361
	Monolophosaurus	Non-megalosauran Megalosauroidea	IVPP 84019	dt8	Hendrickx et al., 2020	13.07	7.13	20.83	25	0.545524	1.59373				1	1	0.277778		56.369
	Monolophosaurus	Non-megalosauran Megalosauroidea	IVPP 84019	dt11	Hendrickx et al., 2020	13.47	6.77	20.29	21.56	0.502598	1.50631				1	1			66.1784
	Monolophosaurus	Non-megalosauran Megalosauroidea	IVPP 84019	dt12	Hendrickx et al., 2020	11.24	4.39	12.8	20.33	0.390569	1.13879				1	1			34.6842
	Monolophosaurus	Non-megalosauran Megalosauroidea	IVPP 84019	dt14	Hendrickx et al., 2020	11.62	7.73	18.32	22.51	0.665232	1.57659				1	1			54.1876
	Monolophosaurus	Non-megalosauran Megalosauroidea	IVPP 84019	dt6	Hendrickx et al., 2020	12.01	6.58	21.58	23.87	0.547877	1.79684	8.94	4.88	0.545861	1	1	0.285714	0.25	64.3356
	Monolophosaurus	Non-megalosauran Megalosauroidea	IVPP 84019	dt8	Hendrickx et al., 2020	12.31	5.66	19.85	22.41	0.459789	1.61251	8.82	4.82	0.546485	1	1	0.3125		61.9179
	Monolophosaurus	Non-megalosauran Megalosauroidea	IVPP 84019	dt12	Hendrickx et al., 2020	12.93	4.94	21.1	21.4	0.382057	1.63186	10.14	4.91	0.484221	1	1	0.25	0.25	71.0258
	Monolophosaurus	Non-megalosauran Megalosauroidea	IVPP 84019	dt16	Hendrickx et al., 2020	9.86	5.45	16.88	18.61	0.552738	1.71197	8.41	4.64	0.551724	1	1	0.26096		64.392
Piatnitzkysaurus	Piatnitzkysaurus	Non-megalosauran Megalosauroidea	PVL 4073	Isolated with long root	Hendrickx et al., 2020	10.86	6.75	27.41	25.28	0.621547	2.52394	9.95	5.12	0.514573	1	1	0.353107	0.285714	89.4042
	Piatnitzkysaurus	Non-megalosauran Megalosauroidea	PVL 4073	Isolated no root	Hendrickx et al., 2020	8.98	5.24	18.82	19.52	0.583519	2.09577	8.19	4.15	0.506716	1	1	0.30012		72.1471
	Piatnitzkysaurus	Non-megalosauran Megalosauroidea	MACN-CH 895 (largest crown, complete)	Isolated	Hendrickx et al., 2020	23.26	14.15	52.27	56.76	0.60834	2.24721	19.48	11.37	0.583676	1	1	0.416667	0.333333	67.027
	Piatnitzkysaurus	Non-megalosauran Megalosauroidea	MACN-CH 895 (small crown, complete)	Isolated	Hendrickx et al., 2020	17.26	8.98	35.32	39.62	0.520278	2.04635	13.75	8.07	0.586909	1	1	0.416667	0.333333	63.036
Marshosaurus	Marshosaurus	Non-megalosauran Megalosauroidea	UMNH VP 6368	dt4	Hendrickx et al., 2020	10.32	5.76	20.91	23.82	0.55814	2.02616	7.49	4.32	0.576769	1	1	0.333333	0.25	61.2246
	Marshosaurus	Non-megalosauran Megalosauroidea	UMNH VP 6368	dt7	Hendrickx et al., 2020	8.31	4.95	13.16	16.45	0.595668	1.58363	6.73	3.54	0.526003	1	1	0.285714		52.4899
	Marshosaurus	Non-megalosauran Megalosauroidea	DMNH 3718	mx2	Hendrickx et al., 2020	15.55	5.5	31.31	29.48	0.353698	2.0135	12.02	5.86	0.487521	1	1	0.333333	0.25	81.8132
	Marshosaurus	Non-megalosauran Megalosauroidea	DMNH 3718	mx4	Hendrickx et al., 2020	16.55	5.43	40.9	42.3	0.328097	2.4713	15.07	6.25	0.414731	1	1	0.333333		73.8103
	Marshosaurus	Non-megalosauran Megalosauroidea	DMNH 3718	mx7	Hendrickx et al., 2020	15.58	4.44	23.92	29.25	0.284981	1.5353	11.85	5.22	0.440506	1	1	0.30012		54.7419
	Marshosaurus	Non-megalosauran Megalosauroidea	DMNH 3718	mx9	Hendrickx et al., 2020	12.51	4.69	19.51	25.75	0.3749	1.55955	10.17	4.31	0.423795	1	1	0.307692	0.266667	47.0565
	Marshosaurus	Non-megalosauran Megalosauroidea	DMNH 3718	mx10	Hendrickx et al., 2020	11.8	3.67	18	20.66	0.311017	1.52542	10.09	4.58	0.453915	1	1	0.285714	0.238095	60.2321
	Marshosaurus	Non-megalosauran Megalosauroidea	DMNH 3718	mx13	Hendrickx et al., 2020	7.3	3.14	7.77	9.73	0.430137	1.06438	5.53	3.12	0.564195	1	1	0.25	0.133333	51.9332
Afrovenator	Afrovenator	Megalosauridae	UC UBA 1	Isolated	Hendrickx et al., 2020	27.6	11.7	61.1	64.6	0.423913	2.21377	21.8	11.6	0.53211	1	1	0.5	0.625	70.3059
Duriavenator	Duriavenator	Megalosauridae	BMNH R332	mx03	Hendrickx et al., 2020	24.31	12.74	51.73	57.2	0.524064	2.12793	19.07	10.07	0.528055	1	1	0.454545	0.416667	64.7384
	Duriavenator	Megalosauridae	BMNH R332	mx06	Hendrickx et al., 2020	20.97	8.01	39.42	49.15	0.381974	1.87983	18.2	8.48	0.465934	1	1	0.4	0.384615	50.8469
	Duriavenator	Megalosauridae	BMNH R332	dt8	Hendrickx et al., 2020	18.43	9.2	29.97	30.27	0.499186	1.62615	14.43	7.46	0.516979	1	1	0.416667	0.545852	71.2993
	Duriavenator	Megalosauridae	BMNH R332	dt10	Hendrickx et al., 2020	17.2	8.02	28.53	27.46	0.466279	1.65872	13.6	6.98	0.513235	1	1	0.47619	0.5	75.5366
	Duriavenator	Megalosauridae	BMNH R332	mx03	Hendrickx et al., 2020	24.3	12.8	51.09	57.85	0.526749	2.10247						0.454545	0.588235	61.8383
	Duriavenator	Megalosauridae	BMNH R332	mx06	Hendrickx et al., 2020	20.9	11.8	38.92	45.56	0.564593	1.8622						0.454545	0.47619	58.4044
	Duriavenator	Megalosauridae	BMNH R332	Isolated	Hendrickx et al., 2020	18.2	8.32	29.29	34.06	0.457143	1.60934						0.416667	0.555556	59.2755
Megalosaurus	Megalosaurus	Megalosauridae	BMNH R39476 (Purchid 1865)	Isolated	Hendrickx et al., 2020	18.31	10.11	35.45	38.83	0.552157	1.9361	15.8	8	0.506329	1	1	0.344828		65.6484
	Megalosaurus	Megalosauridae	BMNH R47152 (Purchid 1876)	Isolated	Hendrickx et al., 2020	11.25	6.37	22.5	24.25	0.566222	2	9.1	5.4	0.593407	1	1	0.25	0.242424	67.5485
	Megalosaurus	Megalosauridae	BMNH R234 (one large tooth, Purchid 1882)	Isolated	Hendrickx et al., 2020	24.28	13.14	52.33	54.19	0.541186	2.15527	18.07	10.3	0.570006	1	1	0.416667	0.526316	72.5833
	Megalosaurus	Megalosauridae	BMNH R31834 (Purchid 1854)	Isolated	Hendrickx et al., 2020	17.7	6.84	28.64	33.38	0.386441	1.61808	13.14	6.66	0.506849	1	1	0.357143	0.416667	59.0753
	Megalosaurus	Megalosauridae	BMNH R47963 (Purchid 1877)	Isolated	Hendrickx et al., 2020	23.92	12.06	51.74	48.85	0.504181	2.16304	18.53	9.72	0.524555	1	1	0.384615	0.454545	83.0826
	Megalosaurus	Megalosauridae	BMNH R28608 (Purchid 1853)	Isolated	Hendrickx et al., 2020	21.38	13.66	47.37	44.93	0.638915	2.21562	17.25	11.65	0.675362	1	1	0.571429	0.588235	83.0674
	Megalosaurus	Megalosauridae	BMNH R2635 big (Purchid 1895)	Isolated	Hendrickx et al., 2020	26.45	13.93	54.42	59.29	0.526654	2.05747	20.64	11.12	0.53876	1	1	0.454545	0.444444	66.4459
	Megalosaurus	Megalosauridae	BMNH R2635 small (Purchid 1985)	Isolated	Hendrickx et al., 2020	11.36	7.72	26.63	29.75	0.679577	2.34419	8.63	5.63	0.652375	1	1	0.384615		63.1812
	Megalosaurus	Megalosauridae	OUMNH J13505	dt06	Hendrickx et al., 2020	24.12	12.8	46.54	55.81	0.53068	1.92952	19.28	10.2	0.529046	1	1	0.5		55.3543
	Megalosaurus	Megalosauridae	OUMNH J13506	mx01	Hendrickx et al., 2020	24.82	14.85	62.72	68.02	0.598308	2.52699				1	1			67.1907
Dubreuillosaurus	Dubreuillosaurus	Megalosauridae	MNHN 1998-13	pmx1	Hendrickx et al., 2020	8.3	6	18	17	0.722892	2.16867	6	4.5	0.75	1	1	0.434783		83.1026
	Dubreuillosaurus	Megalosauridae	MNHN 1998-13	pmx2	Hendrickx et al., 2020	10.5	7.7	22	23.6	0.733333	2.09524	7.7	5.2	0.675325	1	1	0.4	0.4	68.3045
	Dubreuillosaurus	Megalosauridae	MNHN 1998-13	mx4	Hendrickx et al., 2020	17.52	6.34	27.67	32.11	0.361872	1.57934	11.29	4.92	0.435784	1	1			59.4217
	Dubreuillosaurus	Megalosauridae	MNHN 1998-13	mx5	Hendrickx et al., 2020	17.6	7.06	39.07	37.75	0.401136	2.21989	13.96	5.46	0.391117	1	1			80.9787
	Dubreuillosaurus	Megalosauridae	MNHN 1998-13	mx6	Hendrickx et al., 2020	14.77	6.02	21.29	28.4	0.407583	1.44144	10.58	5.01	0.473535	1	1			47.0657
	Dubreuillosaurus	Megalosauridae	MNHN 1998-13	mx7	Hendrickx et al., 2020	15.71	6.45	27.72	36.02	0.410567	1.76448	12.21	5.57	0.456183	1	1			46.7228
	Dubreuillosaurus	Megalosauridae	MNHN 1998-13	mx9	Hendrickx et al., 2020	10.39	5.68	16.83	22.24	0.546679	1.61983	10.08	4.55	0.451389	1	1			46.2946
	Dubreuillosaurus	Megalosauridae	MNHN 1998-13	dt6	Hendrickx et al., 2020	10.7	5.4	18	17.6	0.504673	1.68224	6.8	3.8	0.558824	1	1	0.3125		74.5636
	Dubreuillosaurus	Megalosauridae	MNHN 1998-13	dt8	Hendrickx et al., 2020	10.5	5.2	16	15.9	0.495238	1.52381	6.4	3.4	0.53125	1	1	0.3125		71.2987
	Dubreuillosaurus	Megalosauridae	MNHN 1998-13	Isolated	Hendrickx et al., 2020	9.9	4.3	14.1	12.8	0.434343	1.42424	6.3	3.2	0.507937	1	1	0.3125	0.3125	75.5972
Torvosaurus	Torvosaurus	Megalosauridae	BYUVP 725 12817	Isolated	Hendrickx et al., 2020	42.43	21.09	105.28	105.12	0.497054	2.48126	28.13	15.67	0.557057	1	1	0.714286	0.833333	78.5774
	Torvosaurus	Megalosauridae	BMNH R36728 (cast; Presid. Martin Munt 18/10/2013)	Isolated	Hendrickx et al., 2020	40.44	21.54	101.98	102.36	0.532641	2.52176	30.68	15.08	0.491525	1	1	0.666667	0.666667	78.0582
	Torvosaurus	Megalosauridae	ML 1100	mx02	Hendrickx et al., 2020	45.52	16.4	106.4	118.57	0.360281	2.33743	33.1	16.8	0.507553	1	1	0.625	0.625	63.539
	Torvosaurus	Megalosauridae	ML 1853	Isolated	Hendrickx et al., 2020	24.81	13.74	43.53	46.39	0.553809	1.75453	21.5	11.16	0.51907	1	1	0.526316	0.526316	67.7202
	Torvosaurus	Megalosauridae	ML 962 (Mesial)	Isolated, mesial	Hendrickx et al., 2020	31.2	20.2	85.8	91.9	0.647436	2.75				1	1	0.625	0.625	68.9751
	Torvosaurus	Megalosauridae	ML 857	Isolated	Hendrickx et al., 2020	32.2	15.8	61.1	67.8	0.490683	1.89752				1	1	0.625	0.5	64.1984
	Torvosaurus	Megalosauridae	SHN.067	Isolated	Hendrickx et al., 2020	47.99	22.89	141.52	145.07	0.476974	2.94895						1	1	76.2037
	Torvosaurus	Megalosauridae	SHN.215	Isolated	Hendrickx et al., 2020	25.35	12.62	62.29	63.64	0.49783	2.4572						0.666667	0.666667	75.4126
	Torvosaurus	Megalosauridae	SHN.221	Isolated	Hendrickx et al., 2020	30.65	17.55	79.79	84.91	0.572594	2.60326						0.833333	0.714286	69.971
	Torvosaurus	Megalosauridae	SHN.257	Isolated	Hendrickx et al., 2020	22.68	15.15	57.21	60.15	0.667989	2.52249						0.625	0.625	71.6398
	Torvosaurus	Megalosauridae	SHN.266	Isolated	Hendrickx et al., 2020	26.31	12.02	57.2	66.55	0.456861	2.17408						0.5	0.625	58.1239
	Torvosaurus	Megalosauridae	SHN.268	Isolated	Hendrickx et al., 2020	36.27	16.93	91.72	98.86	0.466777	2.52881						0.833333	1	68.0876
	Torvosaurus	Megalosauridae	SHN.294	Isolated	Hendrickx et al., 2020	23.23	13.75	52.25	56.71	0.591907	2.24925						0.625	0.625	67.0917
	Torvosaurus	Megalosauridae	SHN.304	Isolated	Hendrickx et al., 2020	25.11	14.17	65.5	65.99	0.564317	2.60852						0.625		77.8954
	Torvosaurus	Megalosauridae	SHN.319	Isolated	Hendrickx et al., 2020	33.69	20.4	93.87	97.05	0.605521	2.78629						0.588235	0.625	74.549
	Torvosaurus	Megalosauridae	SHN.320	Isolated	Hendrickx et al., 2020	39.71	21.6	109.51	116.79	0.543944	2.75774						0.714286	0.714286	69.6581
	Torvosaurus	Megalosauridae	SHN.359a	Isolated	Hendrickx et al., 2020	16.26	7.87	38.76	40.25	0.48401	2.38376						0.5	0.5	73.0266
	Torvosaurus	Megalosauridae	SHN.362	Isolated	Hendrickx et al., 2020	26.39	14.58	52.77	57.95	0.552482	1.99962						0.714286	0.769231	65.4675
	Torvosaurus	Megalosauridae	SHN.364	Isolated	Hendrickx et al., 2020	21.54	15.58	54.46	54.81	0.723305	2.52832						0.625		77.7197
	Torvosaurus	Megalosauridae	SHN.374	Isolated	Hendrickx et al., 2020	47.09	16.75	104.99	117.91	0.355702	2.22956						0.714286	0.833333	62.676
	Torvosaurus	Megalosauridae	SHN.401	Isolated	Hendrickx et al., 2020	48.35	20.64	145.55	152.84	0.426887	3.01034						0.833333	0.714286	72.2207
	Torvosaurus	Megalosauridae	SHN.440	Isolated	Hendrickx et al., 2020	25.75	14.04	70.29	78.49	0.545243	2.72971						0.714286		62.235
	Torvosaurus	Megalosauridae	SHN.441	Isolated	Hendrickx et al., 2020	42.44	23.49	123.67	129.76	0.553487	2.914						0.769231	0.666667	72.3223
	Torvosaurus	Megalosauridae	SHN.442	Isolated	Hendrickx et al., 2020	29.1	16.41	84.13	86.24	0.563918	2.89107						0.714286		76.0936
	Torvosaurus	Megalosauridae	SHN.470	Isolated	Hendrickx et al., 2020	48.38	19.94	145.54	152.44	0.412154	3.00827						0.666667	0.714286	72.6578
cf. Baryonychinae	cf. Baryonychinae	Spinosauridae	XMDFEC V0010	Isolated	Hendrickx et al., 2020	14.57	8.91	40.69	41.63	0.611531	2.79272	10.85	6.77	0.623963	1	1	0.333333	0.315856	76.1854
	Suchosaurus	Spinosauridae	BMNH R36536 (Owen, 1841)	Isolated	Hendrickx et al., 2020	15.21	13.17	32.8	34.19	0.865878	2.15648	11.43	9.33	0.816273	11	12	0.166667		71.8224
Baryonyx	Baryonyx	Spinosauridae	BMNH R9951	pmx04	Hendrickx et al., 2020	13.29	11.19	33.32	33.53	0.841986	2.50715	10.34	8.73	0.844294	1	5		0.142857	77.6471
	Baryonyx	Spinosauridae	BMNH R9951	pmx06	Hendrickx et al., 2020	10.72	8.54	25.41	27.61	0.796642	2.37034	7.74	6.98	0.901809	1	5	0.142857	0.142857	66.972
	Baryonyx	Spinosauridae	BMNH R9951	pmx07	Hendrickx et al., 2020	8.25	7.65	20.82	21.87	0.927273	2.52364	6.69	5.47	0.817638	1	5	0.166667	0.142857	71.77
	Baryonyx	Spinosauridae	BMNH R9951	mx5	Hendrickx et al., 2020	18.16	13.46	32.49	38.61	0.741189	1.7891	14.61	10.38	0.710472	1	1		0.166667	56.9434
	Baryonyx	Spinosauridae	BMNH R9951, large with plaster block 14	Isolated	Hendrickx et al., 2020	16.93	13.62	33.26	33.98	0.804489	1.96456	12.06	9.68	0.802653	1	1			73.0705
	Baryonyx	Spinosauridae	BMNH R9951, small, complete with transparent glue on the root tip	Isolated	Hendrickx et al., 2020	12.06	10.01	26.63	26.8	0.830017	2.20813	9.35	6.95	0.743316	1	9	0.142857	0.142857	76.1694
	Baryonyx	Spinosauridae	BMNH R9951, root cut diagonally with distal root on it	Isolated	Hendrickx et al., 2020	13.4	10.4	29.39	28.97	0.776119	2.19328	10.68	7.73	0.723783	1	1	0.142857	0.142857	78.4804
	Baryonyx	Spinosauridae	BMNH R9951, quite big with black dots on the upper root	Isolated	Hendrickx et al., 2020	15.31	11.75	33.69	33.83	0.767472	2.20052	11.22	9.52	0.848485	2	7	0.125	0.142857	76.3846
	Baryonyx	Spinosauridae	BMNH R9951, very small with very long root with white fractures	Isolated	Hendrickx et al., 2020	9.01	8.44	20.79	21.05	0.936737	2.30744	7.67	5.99	0.780965	1	8	0.142857	0.142857	75.9545
	Baryonyx	Spinosauridae	BMNH R9951, dark, missing entire root	Isolated	Hendrickx et al., 2020	11.18	11.15	25.77	26.82	0.997317	2.30501	8.96	7.8	0.870536	1	8			72.512
	Baryonyx	Spinosauridae	BMNH R9951, 22 quite small, complete, root complete, fractured on lingual side	Isolated	Hendrickx et al., 2020	11.79	10.73	24.15	26.79	0.910093	2.04835	9.64	7.57	0.78527	1	7	0.142857	0.166667	64.3463
	Baryonyx	Spinosauridae	BMNH R9951, very small with part of the root	Isolated	Hendrickx et al., 2020	8.82	7.5	16.86	18.01	0.85034	1.91156	7.97	5.86	0.735257					68.2173
	Baryonyx	Spinosauridae	BMNH R9951, small with tip recontstucted block 14	Isolated	Hendrickx et al., 2020	9.3	7.95	17.91	17.96	0.854839	1.92581	7.9	6.27	0.793671	1	1	0.142857		74.676
	Baryonyx	Spinosauridae	BMNH R9951, small with root very elongated block 14	Isolated	Hendrickx et al., 2020	9.27	7.34	20.44	19.56	0.791802	2.20496	7.4	6.11	0.825676	1		0.142857	0.111111	81.9581
	Baryonyx	Spinosauridae	BMNH R9951, 26 with large plastic stuff on the middle root	Isolated	Hendrickx et al., 2020	15.84	13.25	36.48	37.69	0.83649	2.30303	12.39	9.72	0.784504	1	8	0.142857	0.125	73.4233
	Baryonyx	Spinosauridae	BMNH R9951, 26 large with long root, tip worn	Isolated	Hendrickx et al., 2020	17.11	14.29	30.93	33.33	0.835184	1.80771	13.51	10.46	0.774241	1	8		0.142857	66.9276
	Baryonyx	Spinosauridae	BMNH R9951, 278 broken	Isolated	Hendrickx et al., 2020	19.3	14.41	42.83	41.67	0.746632	2.21917	14.3	10.68	0.746853	1	1	0.166667	0.166667	80.1749
	Baryonyx	Spinosauridae	BMNH R9951, small, lacking root and part of the base	Isolated	Hendrickx et al., 2020	12.73	9.3	21.1	25.01	0.730558	1.6575	11.69	8.35	0.714286	1	1	0.166667	0.166667	57.4771
	Baryonyx	Spinosauridae	BMNH R9951	pm04	Hendrickx et al., 2020	13.06	11.24	31.37	32.29	0.860643	2.40199						0.142857	0.142857	74.2363
	Baryonyx	Spinosauridae	BMNH R9951	pm06	Hendrickx et al., 2020	10.49	7.9	23.72	24.77	0.753098	2.2612						0.142857	0.142857	71.9575
	Baryonyx	Spinosauridae	BMNH R9951a	Isolated	Hendrickx et al., 2020	11.69	11.19	28.72	29.22	0.957228	2.4568						0.142857	0.142857	75.9694
	Baryonyx	Spinosauridae	BMNH R9951d	Isolated	Hendrickx et al., 2020	15.76	12.05	34.8	37.41	0.764594	2.20812						0.142857	0.142857	68.2553
	Baryonyx	Spinosauridae	BMNH R9951e	Isolated	Hendrickx et al., 2020	13.18	10.88	29.67	30.52	0.825493	2.25114						0.142857	0.142857	73.7686
	Baryonyx	Spinosauridae	BMNH R9951f	Isolated	Hendrickx et al., 2020	12.12	10.35	27.19	30.46	0.85396	2.2434						0.142857	0.142857	62.9821
	Baryonyx	Spinosauridae	BMNH R9951h	Isolated	Hendrickx et al., 2020	16.42	15.19	38.55	43.88	0.925091	2.34775						0.142857	0.142857	60.5285
	Baryonyx	Spinosauridae	BMNH R9951n	Isolated	Hendrickx et al., 2020	16.47	13.65	34.12	38.11	0.82878	2.07165						0.142857	0.142857	63.5343
Suchomimus	Suchomimus	Spinosauridae	UC G69-5 (biggest, with black plastic base)	Isolated	Hendrickx et al., 2020	18.2	14.2	54	57.8	0.78022	2.96703	13.2	10.4	0.787879	3	1			68.9387
	Suchomimus	Spinosauridae	UC G67-1	Isolated	Hendrickx et al., 2020	18.6	14.9	48.5	53	0.801075	2.60753	13.6	9.2	0.676471	6	10	0.2	0.142857	65.9749
	Suchomimus	Spinosauridae	UC G67-8	Isolated	Hendrickx et al., 2020	12.4	8.2	32.6	33.3	0.66129	2.62903	8.4	5.7	0.678571	7	7			75.9928
	Suchomimus	Spinosauridae	UC G35-9 (biggest one)	Isolated	Hendrickx et al., 2020	15	11.3	40.4	42.4	0.753333	2.69333	10.7	6.8	0.635514	7	6		0.166667	72.1169
	Suchomimus	Spinosauridae	UC G35-9 (smallest one)	Isolated	Hendrickx et al., 2020	15.2	11.3	32.4	34	0.743421	2.13158	10.6	7.5	0.707547	7	8	0.166667	0.166667	70.9547
	Suchomimus	Spinosauridae	UC G43-4	Isolated	Hendrickx et al., 2020	18	14.4	36.9	46.5	0.8	2.05	13.6	9.8	0.720588	7	7			47.7917
	Suchomimus	Spinosauridae	UC G26-5 (biggest one)	Isolated	Hendrickx et al., 2020	15.9	10.8	41.7	47.8	0.679245	2.62264	11.6	7.8	0.672414	9	3	0.2	0.166667	58.299
	Suchomimus	Spinosauridae	UC G73-3 (medium laterally compressed one)	Isolated	Hendrickx et al., 2020	15.1	9.8	41.2	43.1	0.649007	2.72848	10.8	6.8	0.62963	9	1	0.2	0.2	72.6488
	Suchomimus	Spinosauridae	UC G73-3 (small laterally compressed one with worn tip)	Isolated	Hendrickx et al., 2020	9.4	7.8	26.5	28.6	0.829787	2.81915	7.9	6.2	0.78481	7	8			67.6949
	Suchomimus	Spinosauridae	UC G34-12 (most completed laterally compressed one)	Isolated	Hendrickx et al., 2020	13.4	9.7	39.3	41	0.723881	2.93284	9.5	6.7	0.705263	1	1	0.2	0.181818	73.2827
	Suchomimus	Spinosauridae	UC G100-4 (small one)	Isolated	Hendrickx et al., 2020	14.5	9.5	37.3	39	0.655172	2.57241	10.6	6.7	0.632075	1	5	0.153846	0.166667	72.5073
	Suchomimus	Spinosauridae	UC G22-7 (complete one with root)	Isolated	Hendrickx et al., 2020	12.8	9.8	38.5	39.5	0.765625	3.00781	9	6.6	0.733333	6	6	0.142857		76.1629
	Suchomimus	Spinosauridae	UC G34-12 (with big mesial wear facet)	Isolated	Hendrickx et al., 2020	17.2	11.6	38.8	38	0.674419	2.25581	10.5	7.9	0.752381	6	6	0.153846		79.6702
	Suchomimus	Spinosauridae	UC G34-7 (smallest complete one)	Isolated	Hendrickx et al., 2020	9	8.3	18.2	19.5	0.922222	2.02222	6.5	5.4	0.830769	11	9	0.166667	0.166667	68.2598
	Suchomimus	Spinosauridae	UC G34-7 (biggest complete one)	Isolated	Hendrickx et al., 2020	8	7	23.8	21.4	0.875	2.975	6	4.9	0.816667	10	10			97.4642
	Suchomimus	Spinosauridae	UC G54-4 (most complete one)	Isolated	Hendrickx et al., 2020	19.9	15	47.6	47.8	0.753769	2.39196	14.7	10.6	0.721088	6	6	0.2	0.2	77.3974
	Suchomimus	Spinosauridae	UC G89-5	Isolated	Hendrickx et al., 2020	18.9	15.2	62.94	70.64	0.804233	3.33016						0.181818		58.7361
	Suchomimus	Spinosauridae	UC G54-4	Isolated	Hendrickx et al., 2020	20.8	18.1	56.94	64.22	0.870192	2.7375						0.185185		60.521
	Suchomimus	Spinosauridae	UC G48-9	Isolated	Hendrickx et al., 2020	18.7	13.3	52.66	60.2	0.71123	2.81604						0.142857		57.7731
	Suchomimus	Spinosauridae	UC G67-1	Isolated	Hendrickx et al., 2020	19.2	14.4	54.34	55.6	0.75	2.83021						0.172414		76.2584
Irritator	Irritator	Spinosauridae	SMNS 58022	mx3rd last	Hendrickx et al., 2020	8.2	7.13	21	19.8	0.869512	2.56098	6.44	5.21	0.809006	9				86.7728
Sinopliosaurus	Sinopliosaurus	Spinosauridae	IVPP V4793.1	Isolated	Hendrickx et al., 2020	16.22	11.55	56.23	62.05	0.712084	3.46671	12.53	9.75	0.778132	13	13			61.791
Spinosaurine indet.	Spinosaurinae indet.	Spinosauridae	SMA 0173	Isolated	Hendrickx et al., 2020	27.78	23.86	81.63	85.96	0.858891	2.93844	22.6	17.25	0.763274	8	12			71.728
	Spinosaurinae indet.	Spinosauridae	MSNM V6422	Isolated	Hendrickx et al., 2020	26.28	23.27	55.17	59	0.885464	2.09932				15	8			68.6712
	Spinosaurinae indet.	Spinosauridae	MSNM V3976	Isolated	Hendrickx et al., 2020	18.08	17.12	45.62	50.41	0.946903	2.52323	14.5	12.13	0.836552	16	13			64.426
	Spinosaurinae indet.	Spinosauridae	GZG.V.19990	Isolated	Hendrickx et al., 2020	13	11.5	29.8	30.8	0.884615	2.29231								73.3387
	Spinosaurinae indet.	Spinosauridae	GZG.V.20001	Isolated	Hendrickx et al., 2020	14.1	11	32.2	32.8	0.780142	2.28369								75.1018
	Spinosaurinae indet.	Spinosauridae	GZG.V.20011	Isolated	Hendrickx et al., 2020	13.4	10.1	37.9	38	0.753731	2.82836								79.4106
	Spinosaurinae indet.	Spinosauridae	GZG.V.20030	Isolated	Hendrickx et al., 2020	11.9	9.2	20.5	22.5	0.773109	1.72269								64.8467
	Spinosaurinae indet.	Spinosauridae	GZG.V.20034	Isolated	Hendrickx et al., 2020	17.5	12.1	48	48.5	0.691429	2.74286								77.9458
Chienkosaurus	Chienkosaurus	Metriacanthosauridae	IVPP V237.1	Isolated mesial	Hendrickx et al., 2020	15.78	11.94	36.42	38.53	0.756654	2.30798	13.49	9.35	0.693106	1	1	0.416667	0.428816	70.4379
	Sinraptor	Metriacanthosauridae	IVPP V10600	mx3	Hendrickx et al., 2020	24.39	12.3	59.44	59.5	0.504305	2.43706	21.43	10.27	0.479235	1	1	0.5	0.454545	78.029
	Sinraptor	Metriacanthosauridae	IVPP V10600	mx4	Hendrickx et al., 2020	26.63	10.14	63.43	65.47	0.380774	2.3819	22.47	9.9	0.440587	1	1	0.5	0.5	73.8122
	Sinraptor	Metriacanthosauridae	IVPP V10600	mx6	Hendrickx et al., 2020	26.74	10.22	60.07	63.48	0.382199	2.24645	22.75	9.3	0.408791	1	1	0.5	0.454545	70.4447
	Sinraptor	Metriacanthosauridae	IVPP V10600	mx7	Hendrickx et al., 2020	26.83	8.88	55.94	53.21	0.330973	2.08498	21.63	8.43	0.389736	1	1	0.434783	0.416667	81.5033
	Sinraptor	Metriacanthosauridae	IVPP V10600	mx13	Hendrickx et al., 2020	14.76	6.68	21.62	20.15	0.452575	1.46477	12.46	5.52	0.443018	1	1	0.333333		74.7503
	Sinraptor	Metriacanthosauridae	IVPP V10600	dt8	Hendrickx et al., 2020	21.13	8.23	37.01	38.6	0.389494	1.75154	17.12	8.35	0.487734	1	1	0.434783	0.454545	69.6714
	Sinraptor	Metriacanthosauridae	IVPP V10600, black no plaster	Isolated	Hendrickx et al., 2020	19	9.6	40.55	40.05	0.505263	2.13421	16.49	9.03	0.547605	1	1	0.47619	0.434783	77.8352
	Sinraptor	Metriacanthosauridae	IVPP V10600, black plaster	Isolated	Hendrickx et al., 2020	19.58	9.48	38.42	38.97	0.484168	1.96221	17.13	8.62	0.503211	1	1	0.434783	0.4	73.7929
	Sinraptor	Metriacanthosauridae	IVPP V10600, light brown no pit	Isolated, mesial	Hendrickx et al., 2020	15.33	10.2	32.29	33.33	0.665362	2.10633	15.53	8.66	0.55763	1	1	0.454545	0.4	72.7372
	Sinraptor	Metriacanthosauridae	IVPP V10600, light brown deep pit	Isolated, mesial	Hendrickx et al., 2020	17.08	11.36	38	37.18	0.665105	2.22482	15.43	9.69	0.627997	1	1	0.454545	0.416667	79.563
	Sinraptor	Metriacanthosauridae	IVPP V10600, brown plaster	Isolated	Hendrickx et al., 2020	19.89	10.54	39.97	41.04	0.529915	2.00955	17.6	8.86	0.503409	1	1	0.454545	0.434783	72.8173
Erectopus	Erectopus	Metriacanthosauridae	MNHN 2001-4	mx01	Hendrickx et al., 2020	16.2	7.5	45	49	0.462963	2.77778	13.2	6.6	0.5	1	1	0.357143	0.333333	66.2879
	Erectopus	Metriacanthosauridae	MNHN 2001-4	mx02 (aveolus)	Hendrickx et al., 2020	18.7	7.4	48.3	55.3	0.395722	2.58289	14.5	6.9	0.475862	1	1	0.384615	0.357143	58.6867
	Erectopus	Metriacanthosauridae	MNHN 2001-4	mx03	Hendrickx et al., 2020	21.5	10.3	49	56	0.47907	2.27907	16	7.5	0.46875	1	1	0.416667	0.384615	60.1853
Allosaurus	Allosaurus	Allosauridae	YPM 4944 (or 1333?)	pm02	Hendrickx et al., 2020	12.46	6	28.65	25.49	0.481541	2.29936						0.5	0.5	91.4281
	Allosaurus	Allosauridae	YPM 4944 (or 1333?)	pm03	Hendrickx et al., 2020	12	11.07	20.69	25.59	0.9225	1.72417						0.5	0.5	52.8642
	Allosaurus	Allosauridae	YPM 4944 (or 1333?)	pm05	Hendrickx et al., 2020	13.04	9.28	26.98	30.39	0.711656	2.06902						0.454545	0.5	62.5241
	Allosaurus	Allosauridae	SDSM 25248	pm03	Hendrickx et al., 2020	20.36	12.29	49.57	54	0.603635	2.43468						0.555556	0.555556	66.5982
	Allosaurus	Allosauridae	SDSM 25248	pm05	Hendrickx et al., 2020	16.01	8.23	34.05	39.74	0.514054	2.1268						0.4	0.3125	57.9003
	Allosaurus	Allosauridae	UMNH VP 6499	pmx2	Hendrickx et al., 2020	16.75	15.89	38.35	39.57	0.948657	2.28955	13.39	11.7	0.873786	1	1	0.526316	0.526316	73.539
	Allosaurus	Allosauridae	UMNH VP 6499	pmx3	Hendrickx et al., 2020	16.74	14.27	35.93	38.68	0.852449	2.14636	14.6	10.48	0.717808	1	1	0.5	0.60024	67.9863
	Allosaurus	Allosauridae	UMNH VP 6499	pmx4	Hendrickx et al., 2020	16.96	15.28	43.95	39.1	0.900943	2.59139	16.43	11.76	0.715764	1	1	0.5	0.555556	94.9809
	Allosaurus	Allosauridae	UMNH VP 20687	pmx4	Hendrickx et al., 2020	16.4	14.76	39.52	39.29	0.9	2.40976	15.1	11.75	0.778146	1	1	0.47081	0.444444	78.7764
	Allosaurus	Allosauridae	UMNH VP 10393 (juvenile)	pmx4	Hendrickx et al., 2020	10.47	8.88	27.23	28.67	0.848138	2.60076	9.34	7.05	0.754818	1	1	0.47619	0.461681	71.5379
	Allosaurus	Allosauridae	UMNH VP 9369	dt6	Hendrickx et al., 2020	11.52	8.42	25.69	28.54	0.730903	2.23003	10.4	5.98	0.575	1	1	0.363636	0.307692	64.0959
	Allosaurus	Allosauridae	UMNH VP 6475 (juvenile)	dt1	Hendrickx et al., 2020	5.47	6.39	12.27	11.9	1.16819	2.24314	5.36	4.3	0.802239	1	1	0.384615	0.4	80.727
	Allosaurus	Allosauridae	UMNH VP 6475 (juvenile)	dt4	Hendrickx et al., 2020	7.74	6.07	19.1	19.03	0.784238	2.4677	6.91	4.48	0.648336	1	1	0.37037	0.333333	78.796
	Allosaurus	Allosauridae	UMNH VP 9351	dt2	Hendrickx et al., 2020	12.75	11.8	23.25	25.22	0.92549	1.82353	10.38	7.56	0.728324	1	1	0.5	0.454545	66.3436
	Allosaurus	Allosauridae	UMNH VP 9351	dt4	Hendrickx et al., 2020	14.13	13.29	30.83	37.68	0.940552	2.18188	12.61	8.3	0.658208	1	1	0.5	0.444444	51.0812
	Allosaurus	Allosauridae	UMNH VP 9351	dt6	Hendrickx et al., 2020	14.68	11.23	29.2	32.24	0.764986	1.9891	13.33	8.65	0.648912	1	1	0.428816	0.47081	64.8501
	Allosaurus	Allosauridae	UMNH VP 9211	mx4	Hendrickx et al., 2020	14.94	7.17	31.47	36.57	0.47992	2.10643	13.14	6.21	0.472603	1	1	0.380952	0.4	58.545
	Allosaurus	Allosauridae	UMNH VP 9211	mx6	Hendrickx et al., 2020	14.99	6.54	29.27	33.5	0.436291	1.95264	13.89	7.43	0.534917	1	1			60.784
	Allosaurus	Allosauridae	UMNH VP 9229	mx7	Hendrickx et al., 2020	22.59	12.05	47.49	46.36	0.533422	2.10226	18.06	10.01	0.554264	1	1	0.434783	0.434783	78.8718
	Allosaurus	Allosauridae	UMNH VP 9168	mx6	Hendrickx et al., 2020	20.57	13.93	47.29	50.15	0.6772	2.29898	19.29	10.42	0.540176	1	1	0.4	0.375094	70.1135
	Allosaurus	Allosauridae	UMNH VP 9218	mx1	Hendrickx et al., 2020	18.67	13.44	42.12	44.07	0.719871	2.25603	15.93	10.67	0.669805	1	1	0.47619	0.5	71.7021
	Allosaurus	Allosauridae	UMNH VP 5837	Isolated	Hendrickx et al., 2020	14.88	17.3	33.97	34.95	1.16263	2.28293	12.27	11.51	0.93806	1	1	0.555556	0.5	73.8703
	Allosaurus	Allosauridae	UMNH VP 7438	Isolated	Hendrickx et al., 2020	17.92	15.38	40.2	41.09	0.858259	2.2433	15.91	10.51	0.660591	1	1	0.5	0.545852	74.5032
	Allosaurus	Allosauridae	UMNH VP 6145	Isolated	Hendrickx et al., 2020	10.93	12.56	25.25	27.09	1.14913	2.31016	9.65	9.06	0.93886	1	1	0.487805	0.5	68.6317
	Allosaurus	Allosauridae	UMNH VP 6239	Isolated	Hendrickx et al., 2020	17.64	14.49	36.54	39.45	0.821429	2.07143	15.6	10.89	0.698077	1	1	0.5	0.571429	67.5141
	Allosaurus	Allosauridae	UMNH VP 5812	Isolated	Hendrickx et al., 2020	10.67	9.53	24.03	26.51	0.893158	2.25211	9.49	6.33	0.667018	1	1	0.416667	0.454545	64.9885
	Allosaurus	Allosauridae	UMNH VP 6189	Isolated	Hendrickx et al., 2020	23.33	10.77	45.44	44.71	0.461637	1.94771	19.06	10.03	0.526233	1	1	0.454545	0.363636	76.7407
	Allosaurus	Allosauridae	UMNH VP 5841	Isolated	Hendrickx et al., 2020	16.74	8.25	29.24	35.61	0.492832	1.74671	15.29	8.06	0.527142	1	1	0.416667	0.285714	54.4413
	Allosaurus	Allosauridae	UMNH VP 5785	Isolated	Hendrickx et al., 2020	15.63	10.09	35.91	38.86	0.645553	2.2975	13.67	8.51	0.622531	1	1	0.416667	0.363636	67.5001
	Allosaurus	Allosauridae	UMNH VP 6101	Isolated	Hendrickx et al., 2020	20.28	13.4	41.08	46.62	0.66075	2.02564	17.6	9.4	0.534091	1	1	0.4		61.6766
	Allosaurus	Allosauridae	UMNH VP 6113	Isolated	Hendrickx et al., 2020	21.71	14.01	47.12	51.21	0.645325	2.17043	20.51	11.05	0.538762	1	1	0.37037		66.8687
	Allosaurus	Allosauridae	UMNH VP 6177	Isolated	Hendrickx et al., 2020	16.24	8.01	32.22	35.8	0.493227	1.98399	14.55	6.79	0.466667	1	1	0.384615	0.344828	64.136
	Allosaurus	Allosauridae	UMNH VP 7436	Isolated	Hendrickx et al., 2020	20.64	12.89	45.06	46.08	0.624516	2.18314	18.46	9.6	0.520043	1	1	0.4	0.4	74.1673
	Allosaurus	Allosauridae	UMNH VP 6105	Isolated	Hendrickx et al., 2020	22.87	15.86	49.87	55.28	0.693485	2.18059	20.35	11.17	0.548894	1	1	0.47619	0.47619	64.4159
	Allosaurus	Allosauridae	UMNH VP 9211	mx04	Hendrickx et al., 2020	14.99	7.33	30.02	37.51	0.488993	2.00267						0.5	0.434783	49.4891
	Allosaurus	Allosauridae	UMNH VP 9211	mx06	Hendrickx et al., 2020	15.22	7.04	33.48	37.9	0.462549	2.19974						0.454545	0.454545	61.6885
	Allosaurus	Allosauridae	UMNH VP 9275	mx07	Hendrickx et al., 2020	12.08	7.45	25.43	30.53	0.616722	2.10513						0.285714	0.357143	54.2139
	Allosaurus	Allosauridae	UMNH VP 9273	mx07	Hendrickx et al., 2020	14.06	7.59	28.5	32.12	0.539829	2.02703						0.357143	0.37037	62.495
	Allosaurus	Allosauridae	UMNH VP 9273	mx06	Hendrickx et al., 2020	14.78	7.21	25.52	29.82	0.487821	1.72666						0.333333	0.4	58.8167
	Allosaurus	Allosauridae	UMNH VP 9218	mx01	Hendrickx et al., 2020	17.32	13.03	38.25	42.19	0.752309	2.20843						0.434783	0.526316	65.0313
	Allosaurus	Allosauridae	UMNH VP 9369	d06	Hendrickx et al., 2020	11.77	8.26	25.8	29.1	0.701784	2.19201						0.37037	0.277778	62.1791
	Allosaurus	Allosauridae	UMNH VP 9365	d02	Hendrickx et al., 2020	10.63	9.77	24.62	27.61	0.919097	2.31609						0.454545	0.5	62.7063
	Allosaurus	Allosauridae	UMNH VP 1251	pm05	Hendrickx et al., 2020	16.1	13.82	40.85	40.61	0.858385	2.53727						0.454545	0.5	79.4394
	Allosaurus	Allosauridae	USNM 8335	mx1	Hendrickx et al., 2020	16.7	13.4	34.1	45	0.802395	2.04192	15.3	8.9	0.581699	1	1	0.454545	0.416667	40.6061
	Allosaurus	Allosauridae	USNM 8335	mx10	Hendrickx et al., 2020	18.7	6.9	31.9	35	0.368984	1.70588	14.5	7.4	0.510345	1	1	0.375094	0.384615	64.8128
	Allosaurus	Allosauridae	CM 11844	right pmx	Hendrickx et al., 2020	17.9	17.3	39.5	39.2	0.96648	2.2067	14.2	11.2	0.788732	1	1	0.416667	0.5	77.7902
	Allosaurus	Allosauridae	CM 11844	Isolated	Hendrickx et al., 2020	18.2	14.4	50.8	56.2	0.791209	2.79121	18	10.7	0.594444	1	1			63.6169
	Allosaurus	Allosauridae	CM 21703	pmx2	Hendrickx et al., 2020	12.6	14.5	33.8	34.8	1.15079	2.68254	12.6	9.8	0.777778	1	1	0.5	0.5	74.9739
	Allosaurus	Allosauridae	CM 21703	pmx3	Hendrickx et al., 2020	15.6	12.6	33.3	37	0.807692	2.13462	11.4	9.4	0.824561	1	1			64.1427
	Allosaurus	Allosauridae	CM 21703	pmx4	Hendrickx et al., 2020	15.5	12.8	34.8	35.1	0.825806	2.24516	12.4	8.8	0.709677	1	1	0.454545	0.47619	76.1093
	Allosaurus	Allosauridae	CM 21703	pm02	Hendrickx et al., 2020	14.05	12.52	34.31	34.82	0.891103	2.44199						0.5	0.5	76.2442
	Allosaurus	Allosauridae	CM 21703	pm03	Hendrickx et al., 2020	12.79	10.5	34.2	36.53	0.820954	2.67396						0.5	0.526316	69.4255
	Allosaurus	Allosauridae	CM 21703	pm04	Hendrickx et al., 2020	13.73	10.65	33.19	35.51	0.775674	2.41733						0.454545	0.47619	69.0975
	Allosaurus	Allosauridae	AMNH851	pmx3	Hendrickx et al., 2020	17.95	17.72	36.4	38.02	0.987187	2.02786	13.46	12.21	0.907132	1	1	0.526316	0.5	71.0715
	Allosaurus	Allosauridae	AMNH851	mx09	Hendrickx et al., 2020	22.2	9.74	43.67	48.75	0.438739	1.96712	19.58	9.67	0.493871	1	1	0.454545	0.5	63.6023
	Allosaurus	Allosauridae	LACM 46030	pm01	Hendrickx et al., 2020	16.1	15.3	33.9	36.69	0.950311	2.10559						0.5	0.526316	67.2874
	Allosaurus	Allosauridae	LACM 46030	pm02	Hendrickx et al., 2020	16	14.6	33.89	35.99	0.9125	2.11813						0.485437	0.537634	69.5307
	Allosaurus	Allosauridae	LACM 46030	pm03	Hendrickx et al., 2020	15.5	14.9	36.81	38.3	0.96129	2.37484						0.5	0.526316	72.746
	Allosaurus	Allosauridae	LACM 46030	pm04	Hendrickx et al., 2020	16.3	13.5	37.69	38.98	0.828221	2.31227						0.5	0.510204	73.3268
	Allosaurus	Allosauridae	LACM 46030	pm05	Hendrickx et al., 2020	17.5	12.8	38.85	40.26	0.731429	2.22						0.454545	0.454545	72.7526
Megaraptor	Megaraptor	Megaraptora	MUCPv 595	mx5	Hendrickx et al., 2020	8.1	3.76	14.23	16.45	0.464198	1.75679	6.76	2.9	0.428994	1	1	0.285714		59.8821
	Megaraptor	Megaraptora	MUCPv 595	mx2	Hendrickx et al., 2020	6.24	3.16	11.42	11.28	0.50641	1.83013	5.71	3.31	0.579685	1	1			75.2844
	Megaraptor	Megaraptora	MUCPv 595	mx5	Hendrickx et al., 2020	8.06	3.87	13.72	15.27	0.480149	1.70223	6.35	3.4	0.535433	1	1	0.333333		63.483
	Megaraptor	Megaraptora	MUCPv 595	mx7	Hendrickx et al., 2020	7.35	3.63	12.4	13.73	0.493878	1.68707	6.39	3.2	0.500782	1	1	0.285714		63.9057
	Megaraptor	Megaraptora	MUCPv 595	mx9	Hendrickx et al., 2020	7.73	3.68	10.57	13.66	0.476067	1.3674	5.94	3.39	0.570707	1	1			50.3964
	Megaraptor	Megaraptora	MUCPv 595	mx10	Hendrickx et al., 2020	7.65	3.51	11.22	13.92	0.458824	1.46667	6.61	3.17	0.479576	1	1	0.285714		53.5945
	Fukuiraptor	Megaraptora	NDC-P0001	Isolated	Hendrickx et al., 2020	16.75	6.2	34.8	40.4	0.370149	2.07761								58.7711
Australovenator	Australovenator	Megaraptora	AODF 604-341	Isolated Mesial	Hendrickx et al., 2020	7.16	5.12	13.83	14.45	0.715084	1.93156	5.46							70.5803
	Australovenator	Megaraptora	AODF 604-42	Isolated Mesial	Hendrickx et al., 2020	6.84	5.25	14.62	16.65	0.767544	2.13743	6							61.0467
	Australovenator	Megaraptora	AODF 604-343a	Isolated	Hendrickx et al., 2020	8.32	3.99	12.53	16.26	0.479567	1.50601	6.29							49.2516
	Australovenator	Megaraptora	AODF 604-343b	Isolated	Hendrickx et al., 2020	11.11	5.94	20.85	23.66	0.534653	1.87669	10.03							61.7909
	Australovenator	Megaraptora	AODF 604-342	Isolated	Hendrickx et al., 2020	9.3	4.97	17.21	20.1	0.534409	1.85054	8.24							58.6841
	Australovenator	Megaraptora	AODF 604-344	Isolated	Hendrickx et al., 2020	10.81	6.37	21.97	25.6	0.589269	2.03238	9.3							58.4579
Acrocanthosaurus	Cf. Acrocanthosaurus	Carcharodontosauridae	SMU Acrocan.	Isolated	Hendrickx et al., 2020	30.7	19	95.4	89.5	0.618893	3.10749	24.2	16.1	0.665289	1	1	0.416667	0.5	91.5477
	Cf. Acrocanthosaurus	Carcharodontosauridae	SMU 73417	Isolated	Hendrickx et al., 2020	23.1	10.6	58.9	60.8	0.458874	2.54978	17.6	9.3	0.528409	1	1	0.357143	0.25	74.2802
	Acrocanthosaurus	Carcharodontosauridae	NCSM 14345	pm01	Hendrickx et al., 2020	21.12	16.16	49.12	50.35	0.765152	2.32576	15.55	13.53	0.870096	1	1	0.434783	0.277778	74.4988
	Acrocanthosaurus	Carcharodontosauridae	NCSM 14345	pm03	Hendrickx et al., 2020	28.63	16.61	63.42	62.9	0.580161	2.21516	17.97	12.99	0.722871	1	1	0.375094	0.277778	77.916
	Acrocanthosaurus	Carcharodontosauridae	NCSM 14345	pm01	Hendrickx et al., 2020	20.56	20.82	49.51	49.17	1.01265	2.40807	15.66	13.76	0.878672	1	1	0.384615	0.263158	78.9027
	Acrocanthosaurus	Carcharodontosauridae	NCSM 14345	pm03	Hendrickx et al., 2020	24.05	16.59	63.44	59.51	0.689813	2.63784	18.21	12.63	0.693575	1	1	0.416667	0.294118	88.0939
	Acrocanthosaurus	Carcharodontosauridae	NCSM 14345	mx01	Hendrickx et al., 2020	26.01	16.87	51.84	63.55	0.648597	1.99308	17.89	10.07	0.562884	1	1	0.375094	0.3125	52.1661
	Acrocanthosaurus	Carcharodontosauridae	NCSM 14345	mx02	Hendrickx et al., 2020	38.87	20.28	90.06	93.61	0.521739	2.31695	27.61	16.44	0.595436	1	1	0.384615	0.333333	72.7096
	Acrocanthosaurus	Carcharodontosauridae	NCSM 14345	mx04	Hendrickx et al., 2020	38.77	22.18	94.96	94.12	0.572092	2.44932	27.65	16.9	0.611212	1	1	0.384615	0.416667	79.3856
	Acrocanthosaurus	Carcharodontosauridae	NCSM 14345	mx01	Hendrickx et al., 2020	27.92	18.59	73.58	70.28	0.665831	2.63539	20.54	14.19	0.690847	1	1	0.333333	0.30303	85.5457
	Acrocanthosaurus	Carcharodontosauridae	NCSM 14345	mx02	Hendrickx et al., 2020	32.97	21.39	66.25	74.68	0.648772	2.0094	23.25	14.69	0.631828	1	1	0.416667	0.384615	62.4839
	Acrocanthosaurus	Carcharodontosauridae	NCSM 14345	mx03	Hendrickx et al., 2020	37.85	21.61	92.03	92.82	0.570938	2.43144	27.86	16.58	0.595118	1	1	0.333333	0.454545	77.0164
	Acrocanthosaurus	Carcharodontosauridae	NCSM 14345	mx04	Hendrickx et al., 2020	33.23	18.83	71.01	74.62	0.566657	2.13692	24.33	15.14	0.622277	1	1	0.434783	0.416667	70.8119
	Acrocanthosaurus	Carcharodontosauridae	NCSM 14345	mx05	Hendrickx et al., 2020	39.85	21.96	91.33	92.57	0.551066	2.29184	29.7	17.46	0.587879	1	1	0.357143	0.4	75.7501
	Acrocanthosaurus	Carcharodontosauridae	NCSM 14345	mx06	Hendrickx et al., 2020	40.35	19.95	89.18	97.97	0.494424	2.21016	29.13	15.53	0.533127	1	1	0.357143	0.416667	65.5435
	Acrocanthosaurus	Carcharodontosauridae	NCSM 14345	mx08	Hendrickx et al., 2020	31.54	19.1	73.41	97.14	0.60558	2.32752	23.77	14.87	0.625578	1	1	0.344828	0.416667	34.6316
	Acrocanthosaurus	Carcharodontosauridae	NCSM 14345	mx09	Hendrickx et al., 2020	29.47	15.58	62.68	71.54	0.528673	2.12691	21.88	11.68	0.533821	1	1	0.333333	0.4	60.791
	Acrocanthosaurus	Carcharodontosauridae	NCSM 14345	d01	Hendrickx et al., 2020	14.67	13.12	33.66	37.63	0.894342	2.29448	12.22	9.91	0.810966	1	1			63.1749
	Acrocanthosaurus	Carcharodontosauridae	NCSM 14345	d02	Hendrickx et al., 2020	24.18	20.73	68.47	74.61	0.85732	2.83168	19.02	15.7	0.825447	1	1			66.0761
	Acrocanthosaurus	Carcharodontosauridae	NCSM 14345	d04	Hendrickx et al., 2020	31.64	18.96	82.62	86.44	0.599241	2.61125	23.46	16.66	0.710145	1	1	0.333333		72.4774
	Acrocanthosaurus	Carcharodontosauridae	NCSM 14345	d05	Hendrickx et al., 2020	30.09	17.36	70.98	76.22	0.576936	2.35892	24.54	14.56	0.593317	1	1	0.333333		68.5587
	Acrocanthosaurus	Carcharodontosauridae	NCSM 14345	d07	Hendrickx et al., 2020	30.89	16.06	62.87	69.8	0.519909	2.03529	22.45	12.87	0.573274	1	1	0.333333		64.2476
	Acrocanthosaurus	Carcharodontosauridae	NCSM 14345	d08	Hendrickx et al., 2020	31.06	16.8	55.84	56.6	0.540889	1.79781	20.53	11.96	0.582562	1	1	0.333333	0.363636	72.6213
	Acrocanthosaurus	Carcharodontosauridae	NCSM 14345	d10	Hendrickx et al., 2020	27.93	13.63	47.26	55.82	0.488006	1.69209	21.91	12	0.547695	1	1	0.333333		57.7808
	Acrocanthosaurus	Carcharodontosauridae	NCSM 14345	d12	Hendrickx et al., 2020	24.87	13.54	39.66	49.15	0.544431	1.59469	20.42	9.65	0.472576	1	1	0.3125	0.307692	53.2913
	Acrocanthosaurus	Carcharodontosauridae	NCSM 14345	d13	Hendrickx et al., 2020	20.07	11.51	29.11	38.4	0.573493	1.45042	17	9.96	0.585882	1	1	0.333333	0.347826	48.0704
	Acrocanthosaurus	Carcharodontosauridae	NCSM 14345	d02	Hendrickx et al., 2020	22.63	18.23	58.49	67.09	0.805568	2.58462	15.96	12.35	0.77381	1	1			58.3773
	Acrocanthosaurus	Carcharodontosauridae	NCSM 14345	d04	Hendrickx et al., 2020	31.09	20.01	73.41	79.36	0.643615	2.36121	19.68	15.3	0.777439	1	1	0.353107	0.421053	67.661
	Acrocanthosaurus	Carcharodontosauridae	NCSM 14345	d05	Hendrickx et al., 2020	32.27	16.53	68.47	64.36	0.51224	2.12178	21.03	13.14	0.624822	1	1	0.384615		83.15
	Acrocanthosaurus	Carcharodontosauridae	NCSM 14345	d06	Hendrickx et al., 2020	31.69	16.38	77.54	85.05	0.516882	2.44683	22.83	14.33	0.627683	1	1	0.37037	0.4	65.6177
	Acrocanthosaurus	Carcharodontosauridae	NCSM 14345	d07	Hendrickx et al., 2020	30.96	18.08	67.57	77.14	0.583979	2.18249	22.24	13.05	0.586781	1	1	0.4	0.4	60.6194
	Acrocanthosaurus	Carcharodontosauridae	NCSM 14345	d09	Hendrickx et al., 2020	32.79	15.19	60.06	73.09	0.463251	1.83166	23.06	12.36	0.535993	1	1	0.39032	0.4	54.1073
	Acrocanthosaurus	Carcharodontosauridae	NCSM 14345	d12	Hendrickx et al., 2020	26.07	16.14	42.86	53.08	0.619102	1.64404	17.13	10.35	0.604203	1	1			53.1405
	Acrocanthosaurus	Carcharodontosauridae	NCSM 14345	d13	Hendrickx et al., 2020	24.19	14.89	50.96	60.88	0.615544	2.10666	22.25	12.5	0.561798	1	1			54.8761
	Acrocanthosaurus	Carcharodontosauridae	NCSM 14345	pm01	Hendrickx et al., 2020	21.7	16.26	52.23	55.15	0.749309	2.40691						0.35461	0.331126	70.8686
	Acrocanthosaurus	Carcharodontosauridae	NCSM 14345	pm03	Hendrickx et al., 2020	26.84	16.56	72.35	77.51	0.61699	2.6956						0.364964	0.403226	68.9618
	Acrocanthosaurus	Carcharodontosauridae	NCSM 14345	mx01	Hendrickx et al., 2020	26.73	17.56	62.6	71.29	0.65694	2.34194						0.352113	0.416667	60.4777
	Acrocanthosaurus	Carcharodontosauridae	NCSM 14345	mx02	Hendrickx et al., 2020	35.24	20.59	79.23	90.02	0.584279	2.2483						0.373134	0.406504	61.0812
	Acrocanthosaurus	Carcharodontosauridae	NCSM 14345	mx04	Hendrickx et al., 2020	36.6	20.64	87.09	97.5	0.563934	2.37951						0.367647	0.413223	62.8105
	Acrocanthosaurus	Carcharodontosauridae	NCSM 14345	mx05	Hendrickx et al., 2020	42.07	20.74	93.08	107.9	0.492988	2.2125						0.387597		58.4645
	Acrocanthosaurus	Carcharodontosauridae	NCSM 14345	mx13	Hendrickx et al., 2020	22.43	10.87	33.79	41.87	0.484619	1.50646						0.3125	0.333333	53.6066
	Acrocanthosaurus	Carcharodontosauridae	NCSM 14345	mx14	Hendrickx et al., 2020	17.11	8.55	25.03	32.12	0.499708	1.46289								50.5808
	Acrocanthosaurus	Carcharodontosauridae	NCSM 14345	mx03	Hendrickx et al., 2020	37.21	21.44	90.75	101.46	0.576189	2.43886						0.326797	0.454545	62.8702
	Acrocanthosaurus	Carcharodontosauridae	NCSM 14345	mx06	Hendrickx et al., 2020	40.79	17.86	82.3	90.25	0.437852	2.01765						0.416667	0.384615	65.6506
	Acrocanthosaurus	Carcharodontosauridae	NCSM 14345	mx08	Hendrickx et al., 2020	31.94	16.73	66.78	76.59	0.523795	2.0908						0.33557		60.2655
	Acrocanthosaurus	Carcharodontosauridae	NCSM 14345	mx09	Hendrickx et al., 2020	29.11	14.43	54.97	64	0.495706	1.88835								58.953
	Acrocanthosaurus	Carcharodontosauridae	NCSM 14345	mx11	Hendrickx et al., 2020	26.64	11.78	39.4	46.47	0.442192	1.47898							0.333333	57.8702
	Acrocanthosaurus	Carcharodontosauridae	NCSM 14345	d01	Hendrickx et al., 2020	14.42	11.77	29.46	35.42	0.816227	2.043								54.4017
	Acrocanthosaurus	Carcharodontosauridae	NCSM 14345	d02	Hendrickx et al., 2020	23.91	17.1	58.55	63.55	0.715182	2.44877						0.384615		67.107
	Acrocanthosaurus	Carcharodontosauridae	NCSM 14345	d03	Hendrickx et al., 2020	29.63	17.63	72.23	79.2	0.595005	2.43773							0.37594	65.6731
	Acrocanthosaurus	Carcharodontosauridae	NCSM 14345	d04	Hendrickx et al., 2020	29.11	19.33	70.62	77.81	0.664033	2.42597						0.434783	0.37594	64.9986
	Acrocanthosaurus	Carcharodontosauridae	NCSM 14345	d05	Hendrickx et al., 2020	30.6	18.75	60.48	68.81	0.612745	1.97647						0.384615		61.4389
	Acrocanthosaurus	Carcharodontosauridae	NCSM 14345	d07	Hendrickx et al., 2020	31.1	17.19	64.85	76.07	0.552733	2.08521						0.30303	0.314465	57.4128
	Acrocanthosaurus	Carcharodontosauridae	NCSM 14345	d08	Hendrickx et al., 2020	26.08	16.58	43.01	58.07	0.635736	1.64916						0.37594	0.333333	43.3535
	Acrocanthosaurus	Carcharodontosauridae	NCSM 14345	d10	Hendrickx et al., 2020	28.26	14.35	47.47	55.54	0.507785	1.67976						0.344828	0.294118	58.7195
	Acrocanthosaurus	Carcharodontosauridae	NCSM 14345	d12	Hendrickx et al., 2020	24.96	13.22	38.96	49	0.529647	1.5609						0.322581	0.294118	51.9952
	Acrocanthosaurus	Carcharodontosauridae	NCSM 14345	d14	Hendrickx et al., 2020	20.42	11.46	33.13	38.86	0.561214	1.62243						0.333333	0.5	58.4893
	Acrocanthosaurus	Carcharodontosauridae	NCSM 14345	d17	Hendrickx et al., 2020	15.37	9.1	16.04	22.61	0.592062	1.04359						0.299401		45.1507
	Acrocanthosaurus	Carcharodontosauridae	NCSM 14345	d05	Hendrickx et al., 2020	28.98	16.54	68.15	72.16	0.570738	2.35162						0.285714		70.4074
	Acrocanthosaurus	Carcharodontosauridae	NCSM 14345	d06	Hendrickx et al., 2020	31.35	16.71	62.15	72.97	0.533014	1.98246						0.390625	0.357143	57.6994
Eocarcharia	Eocarcharia	Carcharodontosauridae	MNN GAD14	Isolated	Hendrickx et al., 2020	24	11.5	42	45.3	0.479167	1.75	16.1	8.9	0.552795	1	1	0.3125	0.357143	66.5847
	Eocarcharia	Carcharodontosauridae	MNN GAD14	Isolated	Hendrickx et al., 2020	24	11	48	57	0.458333	2								56.2258
Carcharodontosaurus	Carcharodontosaurus	Carcharodontosauridae	SGM Din-1	mx03	Hendrickx et al., 2020	41.46	15.15	71.01	82.32	0.365412	1.71274						0.555556	0.625	59.6105
	Carcharodontosaurus	Carcharodontosauridae	SGM Din-1	mx05	Hendrickx et al., 2020	41.04	14.88	73.96	80.59	0.362573	1.80214						0.555556	0.649351	65.8249
	Carcharodontosaurus	Carcharodontosauridae	SGM Din-1	mx06	Hendrickx et al., 2020	41.17	14.88	73.17	79.51	0.361428	1.77726						0.555556	0.561798	65.9989
	Carcharodontosaurus	Carcharodontosauridae	SGM Din-1	mx08	Hendrickx et al., 2020	39.91	14.49	73.99	80.02	0.363067	1.85392						0.609756	0.625	66.7482
	Carcharodontosaurus	Carcharodontosauridae	SGM Din-1	Isolated	Hendrickx et al., 2020	41.53	15.09	80.68	89.82	0.363352	1.94269						0.5	0.625	63.8917
	Carcharodontosaurus	Carcharodontosauridae	SGM Din-1	Isolated	Hendrickx et al., 2020	46.65	16.88	97.55	102.25	0.361844	2.0911						0.555556	0.625	70.9404
	Carcharodontosaurus	Carcharodontosauridae	SGM Din-1	mx03	Hendrickx et al., 2020	40.6	17.1	72	81	0.421182	1.7734	29.4	15.9	0.540816	1	1	0.588235	0.714286	62.6144
	Carcharodontosaurus	Carcharodontosauridae	SGM Din-1	mx05	Hendrickx et al., 2020	41.4	16.6	73	75	0.400966	1.76329	32.5	15.6	0.48	1	1	0.526316	0.625	71.1153
	Carcharodontosaurus	Carcharodontosauridae	SGM Din-1	mx06	Hendrickx et al., 2020	41.1	15.5	69	77	0.377129	1.67883	30	12.4	0.413333	1	1	0.555556	0.625	63.1653
	Carcharodontosaurus	Carcharodontosauridae	SGM Din-1	Isolated	Hendrickx et al., 2020	40.4	15.9	80.9	93.4	0.393564	2.00248	32.8	13.6	0.414634	1	1	0.5	0.666667	59.6703
	Carcharodontosaurus	Carcharodontosauridae	UCRC PV6	Isolated	Hendrickx et al., 2020	45.1	16.8	102.6	113	0.372506	2.27494	37.1	16.1	0.433962	1	1	0.588235	0.625	65.1942
	Carcharodontosaurus	Carcharodontosauridae	MNN IGV6	Isolated	Hendrickx et al., 2020	43.8	22.6	85	89.9	0.515982	1.94064	32.6	16.1	0.493865	1	1	0.47619	0.555556	69.3641
	Carcharodontosaurus	Carcharodontosauridae	MNN IGV10	Isolated	Hendrickx et al., 2020	30.1	19.3	60.6	67.8	0.641196	2.01329	25.1	15.4	0.613546	1	1	0.434783	0.526316	63.3539
	Carcharodontosaurus	Carcharodontosauridae	MNN GAD12	Isolated	Hendrickx et al., 2020	32.1	18.2	67.4	76.6	0.566978	2.09969	24.5	15.9	0.64898	1	1	0.357143	0.5	61.3849
	Carcharodontosaurus	Carcharodontosauridae	SMNS uncatalogued, largest one (Algerien Stiftung der Gesellschaft zur Förderung des Naturkunde-museums 1993)	Isolated	Hendrickx et al., 2020	43.32	23.51	99.25	109.75	0.542705	2.29109	35.08	18.08	0.515393	1	1	0.625	0.714286	64.6501
	Carcharodontosaurus	Carcharodontosauridae	SMNS uncatalogued, medium one (Algerien Stiftung der Gesellschaft zur Förderung des Naturkunde-museums 1993)	Isolated	Hendrickx et al., 2020	31.23	14.42	57.22	63.79	0.461736	1.83221	26.25	10.76	0.409905	1	1	0.47619	0.526316	63.6196
	Carcharodontosaurus	Carcharodontosauridae	SMNS uncatalogued, small white (Algerien Stiftung der Gesellschaft zur Förderung des Naturkunde-museums 1993)	Isolated	Hendrickx et al., 2020	26.69	13.63	42.01	45.53	0.510678	1.574	24.03	10.96	0.456097	1	1	0.454545	0.526316	65.1724
	Giganotosaurus	Carcharodontosauridae	MUCPV-CH-1	dt3	Hendrickx et al., 2020	33.82	22.83	81.62	88.54	0.675044	2.41336	28.86	18.5	0.641026	1	1	0.526316	0.588235	67.1945
	Giganotosaurus	Carcharodontosauridae	MUCPV-CH-1	dt7	Hendrickx et al., 2020	37.3	20.32	79.26	86.87	0.544772	2.12493	30.65	16.18	0.527896	1	1	0.526316	0.555556	65.8094
	Giganotosaurus	Carcharodontosauridae	MUCPV-CH-1 complete root and crown	Isolated	Hendrickx et al., 2020	37.83	21.07	96.02	97.74	0.556965	2.5382	33.33	17.54	0.526253	1	1	0.588235	0.666667	76.1967
	Giganotosaurus	Carcharodontosauridae	MUCPV-CH-1 L1 small	Isolated	Hendrickx et al., 2020	30.86	19.37	70.36	72.53	0.627673	2.27997	24.9	16.04	0.644177	1	1	0.5	0.666667	73.6201
	Giganotosaurus	Carcharodontosauridae	MUCPV-CH-1 L2 small complete	Isolated	Hendrickx et al., 2020	34.92	14.6	72.6	72.36	0.418099	2.07904	29.73	13.46	0.452741	1	1	0.5	0.526316	76.4432
	Giganotosaurus	Carcharodontosauridae	MUCPV-CH-1 mesial part of root broken wear facet	Isolated	Hendrickx et al., 2020	33.24	21.56	70.16	76.02	0.648616	2.11071	25.07	17.08	0.681292	1	1	0.555556		67.1621
	Giganotosaurus	Carcharodontosauridae	MUCPV-CH-1 small lateral part of root broken	Isolated	Hendrickx et al., 2020	27.75	11.77	45.5	50.75	0.424144	1.63964	21.26	9.2	0.432738	1	1	0.5	0.5	63.0764
Mapusaurus	Mapusaurus	Carcharodontosauridae	MCF-PVPH-108.166	Isolated (Mesial)	Hendrickx et al., 2020	21.48	17.31	42.74	40.76	0.805866	1.98976	18.62	13.64	0.732546	1	1	0.434783	0.5	80.2659
	Mapusaurus	Carcharodontosauridae	MCF-PVPH-108.8	Isolated	Hendrickx et al., 2020	32.97	19.71	65.35	69.76	0.597816	1.9821	25.57	18.09	0.70747	1	1		0.5	68.5407
	Mapusaurus	Carcharodontosauridae	MCF-PVPH-108.9	Isolated	Hendrickx et al., 2020	32.6	17.11	74.01	75.71	0.524847	2.27025	28.35	13.68	0.48254	1	1	0.4	0.5	74.5227
	Mapusaurus	Carcharodontosauridae	MCF-PVPH-108.171	Isolated	Hendrickx et al., 2020	28.93	15.39	55.1	58.58	0.531974	1.9046	24.74	12.59	0.508892	1	1	0.416667	0.5	68.6758
	Mapusaurus	Carcharodontosauridae	MCF-PVPH-108.10	Isolated	Hendrickx et al., 2020	23.92	13.23	40.32	48.77	0.553094	1.68562	21.51	11.54	0.536495	1	1	0.384615	0.416667	55.3968
	Mapusaurus	Carcharodontosauridae	MCF-PVPH-108.141	Isolated	Hendrickx et al., 2020	23.8	12.32	38.66	46.8	0.517647	1.62437	20.04	9.09	0.453593	1	1			55.4902
	Mapusaurus	Carcharodontosauridae	MCF-PVPH-108.103	Isolated	Hendrickx et al., 2020	19.77	8.6	22.6	24.89	0.435003	1.14315	18.54	7.86	0.423948	1	1	0.416667	0.416667	59.4925
	Ornitholestes	Basal Coelurosauria	AMNH 619	mx1	Hendrickx et al., 2020	2.61	1.65	4.84	5.46	0.632184	1.85441				1	1			62.4145
	Ornitholestes	Basal Coelurosauria	AMNH 619	mx4	Hendrickx et al., 2020	3.53	1.85	6.53	6.62	0.524079	1.84986				1	1	0.1		73.0259
	Ornitholestes	Basal Coelurosauria	AMNH 619	mx6	Hendrickx et al., 2020	2.52	1.44	3.86	4.37	0.571429	1.53175				1	1			61.3863
	Ornitholestes	Basal Coelurosauria	AMNH 619	mx7	Hendrickx et al., 2020	2.14	1.23	3.12	3.65	0.574766	1.45794				1	1			58.4775
	Ornitholestes	Basal Coelurosauria	AMNH 619	dt2	Hendrickx et al., 2020	2.49	1.91	5.32	4.93	0.767068	2.13655				1	1			84.8529
	Ornitholestes	Basal Coelurosauria	AMNH 619	dt5	Hendrickx et al., 2020	2.96	2.12	4.87	5.3	0.716216	1.64527				1	1			65.2523
	Ornitholestes	Basal Coelurosauria	AMNH 619	dt4	Hendrickx et al., 2020	2.48	1.99	5	5.02	0.802419	2.01613				1	1			75.2228
	Ornitholestes	Basal Coelurosauria	AMNH 619	dt5	Hendrickx et al., 2020	2.93	2.06	5.63	6.16	0.703072	1.9215				1	1			65.7367
	Ornitholestes	Basal Coelurosauria	AMNH 619	dt8	Hendrickx et al., 2020	2.52	1.54	4.49	4.72	0.611111	1.78175				1	1	0.0833333		69.1455
	Ornitholestes	Basal Coelurosauria	AMNH 619	dt9	Hendrickx et al., 2020	2.06	1.23	3.89	4.01	0.597087	1.88835				1	1			71.6851
Proceratosaurus	Proceratosaurus	Non-tyrannosaurid Tyrannosauroidea	BMBH R4860	mx7	Hendrickx et al., 2020	6.9	3.5	12.8	14.8	0.507246	1.85507				1	1	0.222222	0.148148	59.7762
	Proceratosaurus	Non-tyrannosaurid Tyrannosauroidea	BMBH R4860	mx4	Hendrickx et al., 2020	6.7	3.3	12.6	14.6	0.492537	1.8806				1	1	0.190476	0.148148	59.5016
	Proceratosaurus	Non-tyrannosaurid Tyrannosauroidea	BMBH R4860	mx8	Hendrickx et al., 2020	6.7	3.4	12.2	14.1	0.507463	1.8209				1	1	0.2	0.166667	59.8633
	Proceratosaurus	Non-tyrannosaurid Tyrannosauroidea	BMBH R4860	mx9	Hendrickx et al., 2020	6.4	3.3	11.2	13.4	0.515625	1.75				1	1	0.2	0.166667	56.3349
	Proceratosaurus	Non-tyrannosaurid Tyrannosauroidea	BMBH R4860	dt3	Hendrickx et al., 2020	3.5	2.9	6.5	7.1	0.828571	1.85714				1	1	0.190476	0.148148	65.7534
	Proceratosaurus	Non-tyrannosaurid Tyrannosauroidea	BMBH R4860	dt4	Hendrickx et al., 2020	4.4	3.1	9	9.9	0.704545	2.04545				1	1	0.190476	0.133333	65.325
	Proceratosaurus	Non-tyrannosaurid Tyrannosauroidea	BMBH R4860	dt8	Hendrickx et al., 2020	5.4	3.4	9.3	11.3	0.62963	1.72222				1	1	0.190476	0.133333	54.793
	Proceratosaurus	Non-tyrannosaurid Tyrannosauroidea	BMBH R4860	dt5	Hendrickx et al., 2020	5.4	3.5	11	12.2	0.648148	2.03704				1	1	0.190476	0.148148	64.367
	Proceratosaurus	Non-tyrannosaurid Tyrannosauroidea	BMBH R4860	dt7	Hendrickx et al., 2020	5.6	3.4	10.2	11.6	0.607143	1.82143				1	1	0.190476	0.148148	61.5564
Guanlong	Guanlong	Non-tyrannosaurid Tyrannosauroidea	IVPP V14531	pmx1	Hendrickx et al., 2020	4.54	5.65	8.9	10.32	1.24449	1.96035				1	1	0.375094	0.363636	59.255
	Guanlong	Non-tyrannosaurid Tyrannosauroidea	IVPP V14531	pmx3	Hendrickx et al., 2020	6.82	5.04	12.19	15.16	0.739003	1.78739				1	1	0.384615		51.8473
	Guanlong	Non-tyrannosaurid Tyrannosauroidea	IVPP V14531	mx2	Hendrickx et al., 2020	9.34	4.92	17.58	20.11	0.526767	1.88223				1	1	0.307692		60.918
	Guanlong	Non-tyrannosaurid Tyrannosauroidea	IVPP V14531	mx3	Hendrickx et al., 2020	8.84	4.81	15.31	19.92	0.544118	1.7319				1	1	0.30012		46.9186
	Guanlong	Non-tyrannosaurid Tyrannosauroidea	IVPP V14531	mx6	Hendrickx et al., 2020	8.46	4.63	14.17	16.88	0.547281	1.67494				1	1			56.961
	Guanlong	Non-tyrannosaurid Tyrannosauroidea	IVPP V14531	mx7	Hendrickx et al., 2020	8.74	3.97	12.3	16.31	0.454233	1.40732				1	1	0.25		47.9065
Dilong	Dilong	Non-tyrannosaurid Tyrannosauroidea	IVPP 14242	pmx1	Hendrickx et al., 2020	1.38	1.75	4.77	4.9	1.26812	3.45652				1	1	0.151515		76.4809
	Dilong	Non-tyrannosaurid Tyrannosauroidea	IVPP 14242	largest mx	Hendrickx et al., 2020	3.78	1.79	7	7.5	0.473545	1.85185				1	1	0.181818	0.166667	67.6746
	Dilong	Non-tyrannosaurid Tyrannosauroidea	IVPP 14242	distalmost	Hendrickx et al., 2020	2.88	1.33	4.82	5.12	0.461806	1.67361				1	1	0.181818		67.5198
	Dilong	Non-tyrannosaurid Tyrannosauroidea	IVPP 14242	mx1	Hendrickx et al., 2020	2.64	1.88	5.19	5.77	0.712121	1.96591				1	1	0.173913		64.0603
	Dilong	Non-tyrannosaurid Tyrannosauroidea	IVPP 14242	mx2	Hendrickx et al., 2020	2.68	2.16	7.3	7.19	0.80597	2.72388				13		0.181818		81.6621
	Dilong	Non-tyrannosaurid Tyrannosauroidea	IVPP 14242	mx4	Hendrickx et al., 2020	3.53	2.36	7.26	8.29	0.668555	2.05666				14		0.181818		60.8849
	Dilong	Non-tyrannosaurid Tyrannosauroidea	IVPP 14242	mx7	Hendrickx et al., 2020	3.3	1.74	6.05	7.28	0.527273	1.83333				1	1	0.192308	0.145858	55.3969
	Dilong	Non-tyrannosaurid Tyrannosauroidea	IVPP 14242	dt8	Hendrickx et al., 2020	2.8	1.39	5.8	6.37	0.496429	2.07143				1	1	0.2		65.5283
	Dilong	Non-tyrannosaurid Tyrannosauroidea	IVPP 14242	dt2	Hendrickx et al., 2020	2.57	1.98	4.65	5.87	0.770428	1.80934				1	1	0.181818		49.8878
	Dilong	Non-tyrannosaurid Tyrannosauroidea	IVPP 14242	dt4	Hendrickx et al., 2020	2.92	1.63	5.84	6.93	0.558219	2				1	1	0.2		56.3162
	Dilong	Non-tyrannosaurid Tyrannosauroidea	IVPP 14242	dt9	Hendrickx et al., 2020	2.88	1.34	4.16	4.86	0.465278	1.44444				1	1	0.208333		58.5437
	Dilong	Non-tyrannosaurid Tyrannosauroidea	IVPP 14243	pmx2	Hendrickx et al., 2020	1.7	2.2	4.8	5.68	1.29412	2.82353				1	1	0.222222	0.222222	51.1565
	Eotyrannus	Non-tyrannosaurid Tyrannosauroidea	MIWG 1997.550	Isolated pmx (clean, nice)	Hendrickx et al., 2015	5.73	6.95	14.77	14.74	1.21291	2.57766	4.56	5.38	1.17982	1	1	0.353107	0.333333	79.0981
Raptorex	Raptorex	Non-tyrannosaurid Tyrannosauroidea	LH PV18	pmx1	Hendrickx et al., 2015	2.5	4.2	6.8	7.1	1.68	2.72	2.7	2.6	0.962963	1	1	0.277778	0.25	72.9311
	Raptorex	Non-tyrannosaurid Tyrannosauroidea	LH PV18	pmx3	Hendrickx et al., 2015	3.5	5	9	9	1.42857	2.57143	3.5	3.2	0.914286	1	1	0.294118	0.263158	78.7877
	Raptorex	Non-tyrannosaurid Tyrannosauroidea	LH PV18	pmx4	Hendrickx et al., 2015	3.5	4.6	8.8	7.6	1.31429	2.51429	3.3	3	0.909091	1	1	0.285714	0.25	98.0283
	Raptorex	Non-tyrannosaurid Tyrannosauroidea	LH PV18	Isolated7 (pxm)	Hendrickx et al., 2015	2.7	4.6	9.4	9.5	1.7037	3.48148	2	2.5	1.25	1	1	0.285714		79.6915
	Raptorex	Non-tyrannosaurid Tyrannosauroidea	LH PV18	mx2	Hendrickx et al., 2015	9.5	4.8	16.8	20	0.505263	1.76842	6.9	4.3	0.623188	1	1	0.357143	0.277778	56.8115
	Raptorex	Non-tyrannosaurid Tyrannosauroidea	LH PV18	mx6	Hendrickx et al., 2015	9.8	4.2	19.4	22.3	0.428571	1.97959	7.2	3.5	0.486111	1	1	0.3125	0.272777	60.2374
	Raptorex	Non-tyrannosaurid Tyrannosauroidea	LH PV18	mx8	Hendrickx et al., 2015	9.8	3.8	18.7	19.9	0.387755	1.90816	8	3.6	0.45	1	1			68.5931
	Raptorex	Non-tyrannosaurid Tyrannosauroidea	LH PV18	mx10	Hendrickx et al., 2015	8.1	3.3	10	11.3	0.407407	1.23457	4.8	2.4	0.5	1	1	0.27027	0.277778	59.3582
	Raptorex	Non-tyrannosaurid Tyrannosauroidea	LH PV18	dt5	Hendrickx et al., 2015	7.4	3.4	11	13.5	0.459459	1.48649	6.1	3.2	0.52459	1	1	0.25	0.263158	54.5051
	Raptorex	Non-tyrannosaurid Tyrannosauroidea	LH PV18	dt8	Hendrickx et al., 2015	9.6	3.8	14.3	17.4	0.395833	1.48958	8	3.6	0.45	1	1	0.272777	0.25	55.2489
	Raptorex	Non-tyrannosaurid Tyrannosauroidea	LH PV18	dt9	Hendrickx et al., 2015	8.9	3.1	14	14.5	0.348315	1.57303				1	1	0.277778	0.263158	68.7703
	Raptorex	Non-tyrannosaurid Tyrannosauroidea	LH PV18	Isolated1	Hendrickx et al., 2015	10.7	4	19.1	20.3	0.373832	1.78505	7.6	4.1	0.539474	1	1	0.333333	0.322581	68.1374
	Raptorex	Non-tyrannosaurid Tyrannosauroidea	LH PV18	Isolated2	Hendrickx et al., 2015	10.3	4.7	21.2	23.8	0.456311	2.05825	7.1	3.7	0.521127	1	1	0.294118	0.30303	62.9334
	Raptorex	Non-tyrannosaurid Tyrannosauroidea	LH PV18	Isolated3	Hendrickx et al., 2015	8	4.9	18.8	18	0.6125	2.35	6.1	3.9	0.639344	1	1	0.322581	0.3125	83.1079
	Raptorex	Non-tyrannosaurid Tyrannosauroidea	LH PV18	Isolated4	Hendrickx et al., 2015	9	3.6	13.4	19	0.4	1.48889	5.8	3.1	0.534483	1	1	0.30012		39.8818
	Raptorex	Non-tyrannosaurid Tyrannosauroidea	LH PV18	Isolated5	Hendrickx et al., 2015	7	4.2	14.2	16.4	0.6	2.02857	5.2	3.2	0.615385	1	1	0.333333	0.277778	59.561
	Raptorex	Non-tyrannosaurid Tyrannosauroidea	LH PV18	Isolated6	Hendrickx et al., 2015	8.7	3	12	14.6	0.344828	1.37931	5.9	2.7	0.457627	1	1	0.27027	0.277778	55.2368
Alioramus	Alioramus	Tyrannosauridae	IGM 100/1844	dt7	Hendrickx et al., 2015	12.44	6.7	22.85	24.35	0.538585	1.83682	10.61	5.3	0.499529	1	1	0.37037	0.357143	68.1421
	Alioramus	Tyrannosauridae	IGM 100/1844	dt13	Hendrickx et al., 2015	11.98	6	18.66	22.14	0.500835	1.5576	9.2	4.24	0.46087	1	1	0.333333	0.344828	57.4384
	Alioramus	Tyrannosauridae	IGM 100/1844	dt14	Hendrickx et al., 2015	11.99	5.59	18.2	22.77	0.466222	1.51793	10.29	4.96	0.482021	1	1	0.333333	0.333333	52.6857
	Alioramus	Tyrannosauridae	IGM 100/1844	mx03	Young et al., 2019 (C.H. pers. measurements)	13.68	7.86	34.08	35.1	0.574561	2.49123	9.75	6.02	0.617436	1	1	0.37037	0.37037	74.4339
	Alioramus	Tyrannosauridae	IGM 100/1844	mx05	Hendrickx et al., 2015	18.03	8.38	39.84	37.37	0.464781	2.20965	12.78	7.06	0.552426	1	1	0.384615	0.37037	84.2772
	Alioramus	Tyrannosauridae	IGM 100/1844	mx07	Hendrickx et al., 2015	16.63	6.25	31.71	31.46	0.375827	1.90679	12.7	6.04	0.475591	1	1	0.357143	0.37037	75.5692
	Alioramus	Tyrannosauridae	IGM 100/1844	mx09	Hendrickx et al., 2015	15.81	5.99	26.49	26.79	0.378874	1.67552	12.16	5.35	0.439967	1	1	0.357143	0.333333	71.7031
	Alioramus	Tyrannosauridae	IGM 100/1844	mx11	Hendrickx et al., 2015	15.48	5.81	24.21	25.49	0.375323	1.56395	12.34	5.411	0.438493	1	1	0.3125	0.333333	67.4022
	Alioramus	Tyrannosauridae	IGM 100/1844	mx13	Hendrickx et al., 2015	12.66	4.92	19.85	26.07	0.388626	1.56793	9.55	4.51	0.472251	1	1	0.3125	0.333333	47.5064
	Alioramus	Tyrannosauridae	IGM 100/1844	mx14	Hendrickx et al., 2015	10.92	4.6	16.09	18.15	0.421245	1.47344	8.88	3.97	0.447072	1	1	0.333333	0.3125	61.3952
	Alioramus	Tyrannosauridae	IGM 100/1844	Isolated1	Hendrickx et al., 2015	13.45	6.74	23.44	24.88	0.501115	1.74275	10.46	5.86	0.560229	1	1	0.357143	0.333333	68.0213
	Alioramus	Tyrannosauridae	IGM 100/1844	Isolated2	Hendrickx et al., 2015	12.1	7.19	25.84	26.01	0.594215	2.13554	9.03	5.83	0.645626	1	1	0.37037	0.333333	75.7232
	Alioramus	Tyrannosauridae	IGM 100/1844	Isolated3	Hendrickx et al., 2015	13.12	5.6	22.97	24.29	0.426829	1.75076	10.17	5.34	0.525074	1	1	0.3125	0.294118	68.411
	Alioramus	Tyrannosauridae	IGM 100/1844	Isolated4	Hendrickx et al., 2015	12.46	5.49	20.39	24.47	0.44061	1.63644	9.91	4.8	0.484359	1	1	0.3125	0.322581	56.3067
	Alioramus	Tyrannosauridae	IGM 100/1844	Isolated5	Hendrickx et al., 2015	12.29	5.49	19.74	20.77	0.446705	1.60618	9.85	4.9	0.497462	1	1	0.357143	0.294118	67.8156
	Alioramus	Tyrannosauridae	IGM 100/1844	Isolated6	Hendrickx et al., 2015	9.55	4.54	13.01	15.87	0.475393	1.3623	8.08	3.97	0.491337	1	1	0.263158	0.277778	55.0142
Gorgosaurus	Gorgosaurus	Tyrannosauridae	ROM 1247	d02	Smith et al., 2005	12.4	11.6	25.53	25.99	0.935484	2.05887						0.454545		74.0188
	Gorgosaurus	Tyrannosauridae	ROM 1247	d03	Smith et al., 2005	17.82	14.25	42.21	42.39	0.799663	2.36869						0.4	0.5	77.2751
	Gorgosaurus	Tyrannosauridae	ROM 1247	d04	Smith et al., 2005	21.28	10.77	39.68	45.91	0.506109	1.86466						0.454545	0.416667	59.6914
	Gorgosaurus	Tyrannosauridae	ROM 1247	d06	Smith et al., 2005	21.24	12.89	43.84	53.44	0.606874	2.06403						0.416667	0.454545	52.4027
	Gorgosaurus	Tyrannosauridae	ROM 1247	d08	Smith et al., 2005	19.96	13.56	43.31	44.01	0.679359	2.16984						0.357143	0.47619	74.8375
	Gorgosaurus	Tyrannosauridae	ROM 1247	d09	Smith et al., 2005	17.81	7.67	31.91	32.75	0.430657	1.79169						0.4	0.416667	71.4297
	Gorgosaurus	Tyrannosauridae	ROM 1247	d11	Smith et al., 2005	18.48	11.41	37	41.35	0.617424	2.00216						0.384615	0.5	63.4828
	Gorgosaurus	Tyrannosauridae	ROM 1247	d13	Smith et al., 2005	17.72	9.21	31.3	41.5	0.519752	1.76637						0.333333		44.0795
	Gorgosaurus	Tyrannosauridae	ROM 1247	d15	Smith et al., 2005	13.69	8.83	22.19	24.9	0.644996	1.62089						0.357143		62.4785
	Gorgosaurus	Tyrannosauridae	ROM 1247	mx04	Smith et al., 2005	26.48	13.4	54.85	58.75	0.506042	2.07137						0.434783	0.555556	68.4228
	Gorgosaurus	Tyrannosauridae	ROM 1247	mx09	Smith et al., 2005	20.55	10.57	40.31	36.92	0.514355	1.96156						0.454545	0.4	83.9286
	Gorgosaurus	Tyrannosauridae	USNM 12814 (AMNH 5428)	d03	Hendrickx et al., 2015	22.2	15.8	40	45.1	0.711712	1.8018	16.4	13.4	0.817073	1	1	0.5	0.526316	62.4282
	Gorgosaurus	Tyrannosauridae	USNM 12814 (AMNH 5428)	d07	Hendrickx et al., 2015	20.6	14.6	38.9	45	0.708738	1.88835	18.2	12.1	0.664835	1	1	0.47619	0.454545	59.6729
	Gorgosaurus	Tyrannosauridae	USNM 12814 (AMNH 5428)	d09	Hendrickx et al., 2015	20.3	14.9	42.5	45.1	0.73399	2.0936	17.1	11.4	0.666667	1	1	0.5	0.454545	69.5468
	Gorgosaurus	Tyrannosauridae	USNM 12814 (AMNH 5428)	d11	Hendrickx et al., 2015	16.6	12.4	29.6	35.6	0.746988	1.78313	16.2	10.7	0.660494	1	1	0.454545	0.454545	55.6579
	Gorgosaurus	Tyrannosauridae	USNM 12814 (AMNH 5428)	d12	Hendrickx et al., 2015	17.9	12.6	27	33.1	0.703911	1.50838	13.4	7.9	0.589552	1	1	0.434783	0.454545	54.5654
	Gorgosaurus	Tyrannosauridae	USNM 12814 (AMNH 5428)	d13	Hendrickx et al., 2015	12.7	7.9	14.5	19.1	0.622047	1.14173	8.9	5.8	0.651685	1	1			49.3792
	Gorgosaurus	Tyrannosauridae	TMP 86.144.01	dt4	Young et al., 2019 (C.H. pers. measurements)	14.83	7.88	29.05	26.77	0.531355	1.95887	10.74	6.98	0.649907	1	1	0.333333	0.333333	83.2983
	Gorgosaurus	Tyrannosauridae	TMP 86.144.01	dt5	Young et al., 2019 (C.H. pers. measurements)	14.59	8.72	29.83	28.98	0.59767	2.04455	12.21	7.08	0.579853	1	1	0.333333	0.353107	78.8948
	Gorgosaurus	Tyrannosauridae	TMP 86.144.01	dt10	Young et al., 2019 (C.H. pers. measurements)	13.69	7.51	23.65	24.77	0.548576	1.72754	11.4	6.36	0.557895	1	1	0.333333	0.277778	69.1266
	Gorgosaurus	Tyrannosauridae	TMP 86.144.01	Isolated	Young et al., 2019 (C.H. pers. measurements)	9.65	7.51	20.09	21.89	0.778238	2.08187	7.69	6.44	0.837451	1	1	0.37037		66.4668
	Gorgosaurus	Tyrannosauridae	TMP 86.144.01	Isolated	Young et al., 2019 (C.H. pers. measurements)	19.01	9.84	42.29	41.04	0.517622	2.22462	14.78	8.44	0.571042	1	1	0.37037	0.384615	80.5116
	Gorgosaurus	Tyrannosauridae	TMP 86.144.01	Isolated	Young et al., 2019 (C.H. pers. measurements)	16.15	8.81	35.22	33.73	0.545511	2.1808	13.14	6.82	0.519026	1	1	0.322581	0.344828	81.6567
	Gorgosaurus	Tyrannosauridae	TMP 86.144.01	Isolated	Young et al., 2019 (C.H. pers. measurements)	15.48	8.13	29.09	29.46	0.525194	1.8792	12.33	6.68	0.541768	1	1	0.30303	0.285714	73.3526
	Gorgosaurus	Tyrannosauridae	TMP 86.144.01	Isolated	Young et al., 2019 (C.H. pers. measurements)	14.64	9.31	28.6	28.23	0.635929	1.95355	11.54	7.39	0.640381	1	1	0.357143	0.325203	76.4756
	Gorgosaurus	Tyrannosauridae	TMP 86.144.01	Isolated	Young et al., 2019 (C.H. pers. measurements)	14.07	6.79	21.42	22	0.482587	1.52239	10.43	6.09	0.583893	1	1	0.294118		68.8721
Daspletosaurus	Daspletosaurus	Tyrannosauridae	BMNH R4863 Cutler collection	d04	Smith et al., 2005	28.83	19.82	55.99	59.02	0.687478	1.94207						0.5	0.454545	69.718
	Daspletosaurus	Tyrannosauridae	BMNH R4863 Cutler collection	d08	Smith et al., 2005	26.37	17.7	44.57	51.28	0.671217	1.69018						0.5	0.384615	60.3351
	Daspletosaurus	Tyrannosauridae	BMNH R4863 Cutler collection	d10	Smith et al., 2005	24.47	18.46	53.37	57.27	0.754393	2.18104						0.5	0.5	68.433
	Daspletosaurus	Tyrannosauridae	BMNH R4863 Cutler collection	Isolated, pmx	Hendrickx et al., 2015	10.14	16.63	30.91	30.89	1.64004	3.04832	9.42	12.05	1.27919	1	1	0.25	0.25	80.6678
	Daspletosaurus	Tyrannosauridae	BMNH R4863 Cutler collection	d04	Hendrickx et al., 2015	28.99	20.3	56.18	60.6	0.700241	1.93791	17.99	12.5	0.69483	1	1	0.5	0.4	67.2881
	Daspletosaurus	Tyrannosauridae	BMNH R4863 Cutler collection	d08	Hendrickx et al., 2015	26.79	18.15	43.82	51.84	0.677492	1.63568	20.65	13.1	0.634383	1	1	0.416667	0.454545	57.6832
	Daspletosaurus	Tyrannosauridae	BMNH R4863 Cutler collection	d10	Hendrickx et al., 2015	25.87	18.3	54.4	57.32	0.707383	2.10282	19.6	12.49	0.637245	1	1	0.47619	0.434783	70.3873
	Daspletosaurus	Tyrannosauridae	BMNH R4863 Cutler collection	d12	Hendrickx et al., 2015	16.62	11.37	23.14	24.23	0.684116	1.3923	13.49	8.84	0.6553	1	1	0.333333	0.333333	65.979
	Daspletosaurus	Tyrannosauridae	BMNH R4863 Purchased by Sternberg 1910	Isolated	Hendrickx et al., 2015	26.85	20.4	60.8	62.22	0.759777	2.26443	20.5	14.72	0.718049	1	1	0.555556	0.47619	74.4518
	Daspletosaurus	Tyrannosauridae	AMNH 5346	mx02	Smith et al., 2005	27	22.63	74.78	80.86	0.838148	2.76963						0.454545	0.416667	67.4385
	Daspletosaurus	Tyrannosauridae	MOR 590	d02	Smith et al., 2005	18.02	12.68	36.43	39.52	0.703663	2.02164						0.446429	0.416667	66.8738
	Daspletosaurus	Tyrannosauridae	MOR 590	d03	Smith et al., 2005	22.88	17.81	52.62	56.49	0.778409	2.29983						0.5	0.442478	68.5393
	Daspletosaurus	Tyrannosauridae	MOR 590	d05	Smith et al., 2005	22.86	17.28	54.55	57.94	0.755906	2.38626							0.47619	70.0482
	Daspletosaurus	Tyrannosauridae	MOR 590	d07	Smith et al., 2005	22.53	16.63	49.57	49.81	0.738127	2.20018						0.555556	0.5	76.3031
	Daspletosaurus	Tyrannosauridae	MOR 590	d08	Smith et al., 2005	22.32	12.29	46.78	50.65	0.550627	2.09588						0.5	0.390625	67.2259
	Daspletosaurus	Tyrannosauridae	MOR 590	d10	Smith et al., 2005	19.19	12.17	34.93	35.69	0.634184	1.82022						0.454545		72.0597
	Daspletosaurus	Tyrannosauridae	TMP 1997.12.223	mx5	Young et al., 2019 (C.H. pers. measurements)	33.24	23.64	74.88	79.05	0.711191	2.25271	25.87	18.01	0.696173	1	1	0.588235	0.555556	70.5862
	Daspletosaurus	Tyrannosauridae	TMP 1997.12.223	mx8	Young et al., 2019 (C.H. pers. measurements)	30.51	18.3	60.01	57.15	0.599803	1.9669	23.93	15.09	0.630589	1	1	0.434783	0.47619	80.1631
	Daspletosaurus	Tyrannosauridae	TMP 1997.12.223	mx11	Young et al., 2019 (C.H. pers. measurements)	24.58	15.79	45.24	46.67	0.642392	1.84052	19.79	11.22	0.566953	1	1	0.4	0.454545	71.2993
Albertosaurus	Albertosaurus	Tyrannosauridae	DMNH 22019	Isolated	Hendrickx et al., 2015	22.8	13	45.9	49.8	0.570175	2.01316				1	1	0.454545	0.384615	66.8418
	Albertosaurus	Tyrannosauridae	TMP 81.10.01	mx4	Young et al., 2019 (C.H. pers. measurements)	30.85	16.19	67.51	69.54	0.524797	2.18833	24.8	15.69	0.632661	1	1	0.555556	0.588235	73.3421
	Albertosaurus	Tyrannosauridae	TMP 81.10.01	mx5	Young et al., 2019 (C.H. pers. measurements)	25.79	14.15	52.7	50.81	0.548662	2.04343	20.17	12.31	0.610312	1	1	0.454545	0.47619	79.6802
	Albertosaurus	Tyrannosauridae	TMP 81.10.01	mx3	Young et al., 2019 (C.H. pers. measurements)	30.87	19.72	70.27	71.6	0.638808	2.27632	23.26	17.66	0.759243	1	1	0.555556	0.555556	75.0334
	Albertosaurus	Tyrannosauridae	TMP 81.10.01	mx4	Young et al., 2019 (C.H. pers. measurements)	33.26	19.54	76.39	73.46	0.587492	2.29675	25.15	16.18	0.64334	1	1	0.555556	0.555556	82.1528
	Albertosaurus	Tyrannosauridae	TMP 81.10.01	mx5	Young et al., 2019 (C.H. pers. measurements)	33.84	18.68	74.92	77.45	0.552009	2.21395	26.53	16.2	0.610629	1	1	0.555556	0.5	73.0219
	Albertosaurus	Tyrannosauridae	TMP 81.10.01	mx6	Young et al., 2019 (C.H. pers. measurements)	29.02	16.6	62.1	67.57	0.572019	2.1399	22.42	13.18	0.587868	1	1	0.555556	0.555556	66.6965
	Albertosaurus	Tyrannosauridae	TMP 81.10.01	mx7	Young et al., 2019 (C.H. pers. measurements)	31.78	18.01	63.77	79.18	0.566709	2.00661	24.11	14.22	0.589797	1	1	0.5	0.5	50.3279
	Albertosaurus	Tyrannosauridae	TMP 81.10.01	mx8	Young et al., 2019 (C.H. pers. measurements)	29.48	16.66	57.41	54.41	0.565129	1.94742	23.16	13.56	0.585492	1	1	0.5	0.512821	80.4251
	Albertosaurus	Tyrannosauridae	TMP 81.10.01	mx12	Young et al., 2019 (C.H. pers. measurements)	21.88	14.62	41.58	42.59	0.66819	1.90037	17.41	10.83	0.622056	1	1	0.416667	0.416667	72.3933
	Albertosaurus	Tyrannosauridae	TMP 99.50.40	dt11	Young et al., 2019 (C.H. pers. measurements)	14.62	9.1	25.28	28.82	0.622435	1.72914	13.1	6.26	0.477863	1	1	0.377358	0.37037	61.2554
Tyrannosaurus	Tyrannosaurus	Tyrannosauridae	FMNH PR2081 "Sue"	pm03	Smith, 2005	24	36.06	63.65	71.97	1.5025	2.65208						0.704225	0.714286	60.438
	Tyrannosaurus	Tyrannosauridae	FMNH PR2081 "Sue"	mx05	Smith, 2005	45.46	32.63	94.06	108.36	0.717774	2.06907						0.666667	0.769231	59.7635
	Tyrannosaurus	Tyrannosauridae	FMNH PR2081 "Sue"	mx07	Smith, 2005	39.41	27.18	75.75	86.34	0.689673	1.9221						0.60241	0.666667	61.2846
	Tyrannosaurus	Tyrannosauridae	FMNH PR2081 "Sue"	mx08	Smith, 2005	38.56	26.2	72.55	83.44	0.679461	1.88148						0.568182	0.714286	60.3268
	Tyrannosaurus	Tyrannosauridae	FMNH PR2081 "Sue"	mx01	Smith, 2005	44.86	32.6	91.12	101.55	0.726705	2.03121						0.714286	0.833333	63.8044
	Tyrannosaurus	Tyrannosauridae	FMNH PR2081 "Sue"	mx02	Smith, 2005	47.69	37.58	105.26	117.64	0.788006	2.20717						0.714286	0.714286	63.3443
	Tyrannosaurus	Tyrannosauridae	FMNH PR2081 "Sue"	mx03	Smith, 2005	46.74	37.21	108.82	122.99	0.796106	2.3282						0.714286	0.833333	61.5939
	Tyrannosaurus	Tyrannosauridae	FMNH PR2081 "Sue"	mx10	Smith, 2005	35.65	23.48	61.04	71.65	0.658626	1.7122						0.555556	0.714286	58.3749
	Tyrannosaurus	Tyrannosauridae	FMNH PR2081 "Sue"	mx11	Smith, 2005	27.86	18.18	45.96	49.9	0.652548	1.64968						0.5	0.454545	65.4809
	Tyrannosaurus	Tyrannosauridae	FMNH PR2081 "Sue"	mx12	Smith, 2005	18.96	13.2	29.72	32.17	0.696203	1.56751						0.416667	0.555556	65.2296
	Tyrannosaurus	Tyrannosauridae	FMNH PR2081 "Sue"	d02	Smith, 2005	24.51	40.76	75.03	81.29	1.66299	3.0612						0.714286	0.714286	66.6512
	Tyrannosaurus	Tyrannosauridae	FMNH PR2081 "Sue"	d12	Smith, 2005	26.47	19.13	44.29	47.71	0.722705	1.67321						0.47619	0.666667	66.2982
	Tyrannosaurus	Tyrannosauridae	FMNH PR2081 "Sue"	d03	Smith, 2005	52.07	32.67	87.42	95.97	0.627425	1.67889						0.769231	0.769231	64.6485
	Tyrannosaurus	Tyrannosauridae	FMNH PR2081 "Sue"	d05	Smith, 2005	48.74	33.94	88.87	93.94	0.696348	1.82335						0.714286	0.684932	68.8608
	Tyrannosaurus	Tyrannosauridae	FMNH PR2081 "Sue"	d06	Smith, 2005	40.21	27.37	78.09	84.19	0.680676	1.94205						0.555556	0.555556	67.3555
	Tyrannosaurus	Tyrannosauridae	FMNH PR2081 "Sue"	d08	Smith, 2005	34.49	25.71	66.25	74.66	0.745433	1.92085						0.625	0.714286	62.5428
	Tyrannosaurus	Tyrannosauridae	FMNH PR2081 "Sue"	d09	Smith, 2005	34.69	24.51	63.57	66.84	0.706544	1.83252						0.555556	0.568182	69.4235
	Tyrannosaurus	Tyrannosauridae	FMNH PR2081 "Sue"	Isolated, Lpmx	Young et al., 2019 (C.H. pers. measurements)	16.3	35.6	57.2	60.8	2.18405	3.5092	18.1	20.4	1.12707	1	1	0.714286	0.714286	69.6126
	Tyrannosaurus	Tyrannosauridae	FMNH PR2081 "Sue"	Isolated, LmxB	Young et al., 2019 (C.H. pers. measurements)	35	38.2	96.3	103.3	1.09143	2.75143	27.2	26.4	0.970588	1	1	0.666667	0.833333	68.738
	Tyrannosaurus	Tyrannosauridae	FMNH PR2081 "Sue"	Isolated, LmxE	Young et al., 2019 (C.H. pers. measurements)	31	10.2	54	57.9	0.329032	1.74194	20.6	10.9	0.529126	1	1	0.555556	0.606061	67.0908
	Tyrannosaurus	Tyrannosauridae	FMNH PR2081 "Sue"	Isolated, LmxF	Young et al., 2019 (C.H. pers. measurements)	21.9	14.3	34.5	35.3	0.652968	1.57534	16.2	11	0.679012	1	1			69.738
	Tyrannosaurus	Tyrannosauridae	FMNH PR2081 "Sue"	Isolated, LmxG	Young et al., 2019 (C.H. pers. measurements)	14.6	6	28.3	36.5	0.410959	1.93836	11.3	5.5	0.486726	1	1	0.357143	0.296296	45.6888
	Tyrannosaurus	Tyrannosauridae	MOR 1125 "B-rex"	mx10	Smith, 2005	34.2	21.3	60.68	68	0.622807	1.77427						0.526316	0.588235	63.0003
	Tyrannosaurus	Tyrannosauridae	MOR 555 "Devil Rex"	mx07	Smith, 2005	42.86	28.35	72.67	80.21	0.661456	1.69552						0.454545	0.45045	64.2257
	Tyrannosaurus	Tyrannosauridae	MOR 555 "Devil Rex"	mx08	Smith, 2005	37.34	22.82	65.11	70.53	0.611141	1.74371						0.480769	0.537634	66.1536
	Tyrannosaurus	Tyrannosauridae	MOR 555 "Devil Rex"	mx09	Smith, 2005	33.72	24.44	55.11	56.72	0.724792	1.63434						0.462963	0.568182	69.8598
	Tyrannosaurus	Tyrannosauridae	MOR 008	d03	Smith, 2005	46.05	33.78	91	93	0.73355	1.97611						0.714286	0.625	73.1094
	Tyrannosaurus	Tyrannosauridae	MOR 008	d05	Smith, 2005	39.29	31.25	78	79.5	0.795368	1.98524						0.555556	0.555556	73.4457
	Tyrannosaurus	Tyrannosauridae	MOR 008	d06	Smith, 2005	38.23	27.07	75	76.5	0.708083	1.96181						0.588235	0.60241	73.2186
	Tyrannosaurus	Tyrannosauridae	MOR 008	d08	Smith, 2005	35	26.6	65	67	0.76	1.85714						0.555556		71.4892
	Tyrannosaurus	Tyrannosauridae	MOR 008	d10	Smith, 2005	31.5	21	55	56.5	0.666667	1.74603						0.588235	0.555556	70.9891
	Tyrannosaurus	Tyrannosauridae	BHI 3033 "Stan"	pm01	Smith, 2005	14.27	27.38	44.22	50.21	1.91871	3.09881						0.505051	0.526316	57.5321
	Tyrannosaurus	Tyrannosauridae	BHI 3033 "Stan"	pm03	Smith, 2005	21.75	34.87	58.66	60.01	1.60322	2.69701						0.510204	0.549451	75.9605
	Tyrannosaurus	Tyrannosauridae	BHI 3033 "Stan"	pm02	Smith, 2005	18.04	31.75	50.14	56.28	1.75998	2.77938						0.588235	0.555556	61.18
	Tyrannosaurus	Tyrannosauridae	BHI 3033 "Stan"	pm04	Smith, 2005	19.03	30.05	52.8	53.94	1.57909	2.77457						0.574713	0.555556	76.3688
	Tyrannosaurus	Tyrannosauridae	BHI 3033 "Stan"	mx01	Smith, 2005	45.88	34.97	93.68	98.79	0.762206	2.04185						0.649351	0.625	70.0801
	Tyrannosaurus	Tyrannosauridae	BHI 3033 "Stan"	mx02	Smith, 2005	51.98	34.23	102.21	108	0.658523	1.96633						0.694444	0.666667	69.5707
	Tyrannosaurus	Tyrannosauridae	BHI 3033 "Stan"	mx03	Smith, 2005	48.63	33.03	115.3	118.82	0.67921	2.37096						0.609756	0.714286	73.9815
	Tyrannosaurus	Tyrannosauridae	BHI 3033 "Stan"	mx04	Smith, 2005	49.71	29.58	103.42	110.83	0.595051	2.08047						0.625	0.60241	68.3865
	Tyrannosaurus	Tyrannosauridae	BHI 3033 "Stan"	mx05	Smith, 2005	48.15	31.47	94.89	99.43	0.653583	1.97072						0.714286	0.625	70.4721
	Tyrannosaurus	Tyrannosauridae	BHI 3033 "Stan"	mx06	Smith, 2005	38.48	27.2	73.7	79.43	0.706861	1.91528						1.11111	1.06383	67.3089
	Tyrannosaurus	Tyrannosauridae	BHI 3033 "Stan"	mx08	Smith, 2005	29.25	19.01	48.55	56.35	0.649915	1.65983						0.490196	0.485437	59.486
	Tyrannosaurus	Tyrannosauridae	BHI 3033 "Stan"	mx09	Smith, 2005	32.08	21.86	55.34	56.57	0.681421	1.72506						0.505051	0.526316	71.2483
	Tyrannosaurus	Tyrannosauridae	BHI 3033 "Stan"	mx11	Smith, 2005	21.25	14.57	31.96	32.14	0.685647	1.504						0.357143	0.331126	70.1821
	Tyrannosaurus	Tyrannosauridae	BHI 3033 "Stan"	mx07	Smith, 2005	40.19	23.64	66.28	69.94	0.588206	1.64917						0.555556	0.588235	67.9137
	Tyrannosaurus	Tyrannosauridae	BHI 3033 "Stan"	d01	Smith, 2005	26.23	18.32	45.17	46.31	0.698437	1.72207						0.561798	0.555556	70.9661
	Tyrannosaurus	Tyrannosauridae	BHI 3033 "Stan"	d02	Smith, 2005	40.66	26.36	71.99	78.02	0.648303	1.77054						0.609756	0.714286	66.225
	Tyrannosaurus	Tyrannosauridae	BHI 3033 "Stan"	d03	Smith, 2005	46.2	32.7	94.97	96	0.707792	2.05563						0.714286	0.714286	74.7637
	Tyrannosaurus	Tyrannosauridae	BHI 3033 "Stan"	d04	Smith, 2005	46.28	31.88	89.01	90.85	0.68885	1.92329						0.649351	0.684932	72.8988
	Tyrannosaurus	Tyrannosauridae	BHI 3033 "Stan"	d06	Smith, 2005	37.65	27.74	62.01	66.1	0.736786	1.64701						0.625	0.649351	67.0413
	Tyrannosaurus	Tyrannosauridae	BHI 3033 "Stan"	d07	Smith, 2005	33.38	23.15	50.54	53.48	0.693529	1.51408						0.531915	0.588235	66.5633
	Tyrannosaurus	Tyrannosauridae	BHI 3033 "Stan"	d09	Smith, 2005	30.62	21.42	46.83	50.62	0.699543	1.52939						0.543478	0.561798	65.0649
	Tyrannosaurus	Tyrannosauridae	BHI 3033 "Stan"	d10	Smith, 2005	28.05	20.44	41.56	45.04	0.728699	1.48164						0.480769	0.505051	64.4905
	Tyrannosaurus	Tyrannosauridae	BHI 3033 "Stan"	d13	Smith, 2005	15.01	9.22	15.85	17.41	0.614257	1.05596						0.318471	0.367647	57.971
	Tyrannosaurus	Tyrannosauridae	BHI 3033 "Stan"	d05	Smith, 2005	45.89	32.17	77.74	78.96	0.701024	1.69405						0.714286	0.625	71.5202
	Tyrannosaurus	Tyrannosauridae	BHI 3033 "Stan"	d08	Smith, 2005	33.12	24.75	54.12	56.48	0.747283	1.63406						0.5	0.555556	68.7174
	Tyrannosaurus	Tyrannosauridae	BHI 3033 "Stan"	d11	Smith, 2005	23.64	16.61	30.34	33.09	0.702623	1.28342						0.458716	0.454545	62.0499
	Tyrannosaurus	Tyrannosauridae	BHI 3033 "Stan"	d12	Smith, 2005	18.52	13.56	21.91	24.25	0.732181	1.18305						0.357143	0.35461	59.8603
	Tyrannosaurus	Tyrannosauridae	AMNH 5027	pm01	Smith, 2005	16.45	29.84	42.55	50.21	1.81398	2.58663						0.520833	0.549451	53.5625
	Tyrannosaurus	Tyrannosauridae	AMNH 5027	pm03	Smith, 2005	19.46	30.94	45.42	58.26	1.58993	2.33402						0.526316	0.588235	41.0518
	Tyrannosaurus	Tyrannosauridae	AMNH 5027	pm02	Smith, 2005	16.94	29.93	43.64	54.33	1.76682	2.57615						0.625	0.609756	43.5422
	Tyrannosaurus	Tyrannosauridae	AMNH 5027	pm04	Smith, 2005	21.18	31.86	54.62	60.01	1.50425	2.57885						0.561798	0.555556	65.1953
	Tyrannosaurus	Tyrannosauridae	AMNH 5027	mx01	Smith, 2005	38.89	31.57	85.47	93.14	0.811777	2.19774						0.595238	0.666667	66.5547
	Tyrannosaurus	Tyrannosauridae	AMNH 5027	mx03	Smith, 2005	41.46	30.59	103.98	109.25	0.73782	2.50796						0.641026	0.724638	71.712
	Tyrannosaurus	Tyrannosauridae	AMNH 5027	mx05	Smith, 2005	48.6	31.17	102.44	104.79	0.641358	2.10782						0.666667	0.714286	73.7575
	Tyrannosaurus	Tyrannosauridae	AMNH 5027	mx06	Smith, 2005	38.37	24.42	77.64	88.33	0.636435	2.02346						0.675676	0.625	61.3837
	Tyrannosaurus	Tyrannosauridae	AMNH 5027	mx07	Smith, 2005	40.01	25.31	79.7	84.23	0.632592	1.992						0.675676	0.581395	69.6544
	Tyrannosaurus	Tyrannosauridae	AMNH 5027	mx08	Smith, 2005	37.54	26.05	82.14	84.04	0.693926	2.18807						0.60241	0.60241	74.1341
	Tyrannosaurus	Tyrannosauridae	AMNH 5027	mx11	Smith, 2005	25.92	16.46	37.57	42.72	0.635031	1.44946						0.47619	0.5	60.654
	Tyrannosaurus	Tyrannosauridae	AMNH 5027	mx04	Smith, 2005	50.01	33.93	104.06	115.51	0.678464	2.08078						0.625	0.588235	64.2731
	Tyrannosaurus	Tyrannosauridae	SDSM 12047	mx01	Smith, 2005	49.49	34.82	100.89	103.67	0.703576	2.03859						0.769231	0.714286	72.8958
	Tyrannosaurus	Tyrannosauridae	SDSM 12047	mx02	Smith, 2005	36.77	28.68	81.6	88.33	0.779984	2.2192						0.714286	0.714286	67.4061
	Tyrannosaurus	Tyrannosauridae	SDSM 12047	mx03	Smith, 2005	47.17	32.77	117.06	120.69	0.694721	2.48166						0.666667	0.714286	74.2633
	Tyrannosaurus	Tyrannosauridae	SDSM 12047	mx04	Smith, 2005	46.68	36.68	108.53	116.36	0.785775	2.32498						0.746269	0.714286	68.7352
	Tyrannosaurus	Tyrannosauridae	SDSM 12047	mx08	Smith, 2005	43.6	27.5	87.85	105.7	0.630734	2.01491						0.625	0.625	54.4735
	Tyrannosaurus	Tyrannosauridae	SDSM 12047	mx10	Smith, 2005	42.51	26.68	91.27	103.51	0.627617	2.14702						0.641026	0.625	61.5592
	Tyrannosaurus	Tyrannosauridae	SDSM 12047	mx11	Smith, 2005	30.97	20.17	51.14	57.92	0.651275	1.65128						0.588235	0.641026	61.7409
	Tyrannosaurus	Tyrannosauridae	SDSM 12047	mx06	Smith, 2005	48	33.14	105.46	116.94	0.690417	2.19708						0.714286		64.3635
	Tyrannosaurus	Tyrannosauridae	SDSM 12047	mx12	Smith, 2005	22.5	12.83	32.08	39.31	0.570222	1.42578						0.555556	0.555556	54.6921
	Tyrannosaurus	Tyrannosauridae	SDSM 12047	d04	Smith, 2005	44.9	32.89	105.61	115.88	0.732517	2.35212						0.746269		65.6487
	Tyrannosaurus	Tyrannosauridae	SDSM 12047	d05	Smith, 2005	42.37	28.11	96.28	98.9	0.663441	2.27236						0.666667	0.724638	74.0247
	Tyrannosaurus	Tyrannosauridae	SDSM 12047	d06	Smith, 2005	40.22	28.37	82.23	93.04	0.70537	2.04451						0.714286	0.714286	62.011
	Tyrannosaurus	Tyrannosauridae	SDSM 12047	d07	Smith, 2005	39.1	26.46	74.66	80.16	0.676726	1.90946						0.555556	0.625	67.6833
	Tyrannosaurus	Tyrannosauridae	SDSM 12047	d08	Smith, 2005	34.77	25.6	68.24	75.89	0.736267	1.96261						0.666667	0.666667	64.023
	Tyrannosaurus	Tyrannosauridae	SDSM 12047	d09	Smith, 2005	30.92	20.59	55.57	63.53	0.665912	1.79722						0.588235	0.625	61.0098
	Tyrannosaurus	Tyrannosauridae	SDSM 12047	d03	Smith, 2005	46.11	30.97	99.03	109.1	0.671655	2.14769						0.714286	0.694444	65.1887
	Tyrannosaurus	Tyrannosauridae	CM 9380	d2	Hendrickx et al., 2015	30.6	44.5	82.8	103.2	1.45425	2.70588	26.4	28.7	1.08712	1	1	0.625	0.769231	41.4935
	Tyrannosaurus	Tyrannosauridae	CM 9380	d4	Hendrickx et al., 2015	43.4	37.6	93.5	99.6	0.866359	2.15438	30	25.9	0.863333	1	1	0.769231	0.769231	69.2605
	Tyrannosaurus	Tyrannosauridae	CM 9380	d6	Hendrickx et al., 2015	38.4	32.6	77	85.1	0.848958	2.00521	29.4	24.1	0.819728	1	1	0.625	0.769231	64.7534
	Tyrannosaurus	Tyrannosauridae	CM 9380	d7	Hendrickx et al., 2015	34.2	28.3	66.9	67.9	0.827485	1.95614	26.3	19.5	0.741445	1	1	0.625	0.666667	73.6881
	Tyrannosaurus	Tyrannosauridae	CM 9380	d12	Hendrickx et al., 2015	20.2	15.8	26.2	28.3	0.782178	1.29703	14.6	9.9	0.678082	1	1	0.416667	0.454545	62.8067
	Tyrannosaurus	Tyrannosauridae	CM 9380	d1	Hendrickx et al., 2015	16.5	23.6	37.2	36.2	1.4303	2.25455	13.6	15.5	1.13971	1	1	0.625		80.4181
	Tyrannosaurus	Tyrannosauridae	CM 9380	d3	Hendrickx et al., 2015	38.1	48.6	95.6	112.3	1.27559	2.50919	30.6	30.2	0.986928	1	1	0.714286	0.769231	54.8749
	Tyrannosaurus	Tyrannosauridae	CM 9380	d5	Hendrickx et al., 2015	40.4	42.1	87.7	84.4	1.04208	2.17079	29.4	24.2	0.823129	1	1	0.666667	0.714286	81.0219
	Tyrannosaurus	Tyrannosauridae	CM 9380	d7	Hendrickx et al., 2015	35.7	31.7	67.7	74.8	0.887955	1.89636	27.4	21.7	0.791971	1	1	0.555556	0.625	64.6544
	Tyrannosaurus	Tyrannosauridae	CM 9380	d8	Pers. obs.	34.8	26.4	67.8	66	0.758621	1.94828	26.7	18.4	0.689139	1	1	0.555556	0.526316	77.8069
	Tyrannosaurus	Tyrannosauridae	CM 9380	d10	Hendrickx et al., 2015	29.1	22.1	46.4	52	0.75945	1.5945	22.4	15.1	0.674107	1	1	0.555556	0.555556	62.4912
	Tyrannosaurus	Tyrannosauridae	CM 9380	d02	Smith, 2005	42.34	30.87	86.64	87.83	0.729098	2.04629								74.3983
	Tyrannosaurus	Tyrannosauridae	CM 9380	d04	Smith, 2005	51.1	38.04	92.07	104.05	0.744423	1.80176						0.555556		62.1926
	Tyrannosaurus	Tyrannosauridae	CM 9380	d06	Smith, 2005	46.93	35.35	82.01	87.03	0.75325	1.7475						0.5	0.555556	68.0682
	Tyrannosaurus	Tyrannosauridae	CM 9380	d07	Smith, 2005	41.69	31.29	70.93	78.07	0.75054	1.70137						0.588235	0.555556	64.5047
	Tyrannosaurus	Tyrannosauridae	CM 9380	d12	Smith, 2005	21.5	16.32	34.05	37.1	0.75907	1.58372						0.384615	0.5	64.7995
	Tyrannosaurus	Tyrannosauridae	CM 9380	d01	Smith, 2005	25.56	18.09	35.01	40.02	0.707746	1.36972						0.454545	0.526316	59.796
	Tyrannosaurus	Tyrannosauridae	CM 9380	d03	Smith, 2005	48.46	37.48	97.52	102.32	0.773421	2.01238						0.666667	0.625	70.5166
	Tyrannosaurus	Tyrannosauridae	CM 9380	d05	Smith, 2005	47.34	37.21	96.12	100.54	0.786016	2.03042						0.555556	0.588235	70.9288
	Tyrannosaurus	Tyrannosauridae	CM 9380	d08	Smith, 2005	39.08	28.71	68.04	72	0.734647	1.74104						0.454545	0.625	68.2885
	Tyrannosaurus	Tyrannosauridae	CM 9380	d10	Smith, 2005	30.2	23.9	51.94	62.75	0.791391	1.71987							0.555556	55.4063
	Tyrannosaurus	Tyrannosauridae	BMNH R7994 (formely AMNH 5866)	d07	Hendrickx et al., 2015	35.72	25.63	59.32	72.66	0.717525	1.66069	26.05	19.81	0.760461	1	1		0.555556	54.1984
	Tyrannosaurus	Tyrannosauridae	BMNH R7994 (formely AMNH 5866)	d08	Hendrickx et al., 2015	38.54	29.2	61.14	71.14	0.757654	1.5864	29.6	21.39	0.722635	1	1	0.714286	0.555556	59.1956
	Tyrannosaurus	Tyrannosauridae	BMNH R7994 (formely AMNH 5866)	d09	Hendrickx et al., 2015	32.28	26.79	56.51	60.11	0.829926	1.75062	26	19.82	0.762308	1	1		0.666667	67.8711
	Tyrannosaurus	Tyrannosauridae	BMNH R7994 (formely AMNH 5866)	d11	Hendrickx et al., 2015	23.88	17.22	31.45	38.74	0.721106	1.317	18.67	11.88	0.636315	1	1	0.47619	0.5	54.2138
	Tyrannosaurus	Tyrannosauridae	BMNH R7994 (formely AMNH 5866)	d12	Hendrickx et al., 2015	17.83	12.06	16.35	24.51	0.676388	0.916994	12.98	8.84	0.681048	1	1	0.454545	0.454545	41.8235
	Tyrannosaurus	Tyrannosauridae	BMNH R7994 (formely AMNH 5866)	d07	Smith, 2005	40.46	28.55	76.12	86.28	0.705635	1.88136						0.649351	0.735294	61.914
	Tyrannosaurus	Tyrannosauridae	BMNH R7994 (formely AMNH 5866)	d08	Smith, 2005	38.87	33.12	65.23	79.88	0.852071	1.67816						0.666667	0.714286	54.1519
	Tyrannosaurus	Tyrannosauridae	BMNH R7994 (formely AMNH 5866)	d09	Smith, 2005	32.59	26.99	56.6	62.74	0.828168	1.73673						0.625	0.60241	63.966
	Tyrannosaurus	Tyrannosauridae	BMNH R7994 (formely AMNH 5866)	d11	Smith, 2005	30.49	22.12	45.63	52.6	0.725484	1.49656						0.555556	0.485437	59.7826
	Tyrannosaurus	Tyrannosauridae	BMNH R7994 (formely AMNH 5866)	d12	Smith, 2005	23.98	16.12	32.38	37.07	0.672227	1.35029						0.47619	0.416667	59.5591
	Tyrannosaurus	Tyrannosauridae	BMNH R7994 (formely AMNH 5866)	d13	Smith, 2005	18.37	10.35	22.51	26.85	0.563419	1.22537						0.357143	0.47619	55.9963
	Tyrannosaurus	Tyrannosauridae	LACM 150167	mx06	Smith, 2005	42.1	25.8	88.82	92.44	0.612827	2.10974						0.588235	0.625	71.8191
	Tyrannosaurus	Tyrannosauridae	LACM 150167	d03	Smith, 2005	38.1	23.9	73.35	86.7	0.627297	1.9252						0.5	0.625	57.1023
	Tyrannosaurus	Tyrannosauridae	LACM 150167	d04	Smith, 2005	42.1	28.9	76.02	87.89	0.686461	1.8057						0.588235	0.625	59.8403
	Tyrannosaurus	Tyrannosauridae	LACM 150167	d13	Smith, 2005	16.2	11	17.75	19.9	0.679012	1.09568						0.357143	0.416667	57.8199
	Tyrannosaurus	Tyrannosauridae	LACM 23844	mx01	Smith, 2005	46	33.7	79.09	88.18	0.732609	1.71935								63.3683
	Tyrannosaurus	Tyrannosauridae	LACM 23844	mx03	Smith, 2005	54.5	34.4	117.1	138.9	0.631193	2.14862						0.625	0.769231	55.612
	Tyrannosaurus	Tyrannosauridae	LACM 23844	mx05	Smith, 2005	47.8	32.6	100.5	110.9	0.682008	2.10251						0.5	0.769231	64.9834
	Tyrannosaurus	Tyrannosauridae	LACM 23844	d02	Smith, 2005	38.8	27.4	68.93	77.65	0.706186	1.77655								62.4862
	Tyrannosaurus	Tyrannosauridae	LACM 23844	d04	Smith, 2005	47.1	35.1	87.99	107.4	0.745223	1.86815								53.5489
	Tyrannosaurus	Tyrannosauridae	LACM 23844	d05	Smith, 2005	47.6	33.9	96.94	102.2	0.712185	2.03655						0.714286	0.666667	70.0904
	Tyrannosaurus	Tyrannosauridae	LACM 23844	d07	Smith, 2005	37.2	27.1	60.98	71.93	0.728495	1.63925						0.625	0.588235	57.9584
	Tyrannosaurus	Tyrannosauridae	LACM 23844	d08	Smith, 2005	41.2	28.5	85.3	96.94	0.691748	2.07039								61.4409
	Tyrannosaurus	Tyrannosauridae	LACM 23844	d11	Smith, 2005	20	15.9	21.78	27.29	0.795	1.089								52.1118
	Tyrannosaurus	Tyrannosauridae	UCMP 118742	mx07	Smith, 2005	45.4	35	83.09	94.84	0.770925	1.83018						0.5		61.1755
	Tyrannosaurus	Tyrannosauridae	UCMP 118742	mx08	Smith, 2005	42	30.5	71.36	78.29	0.72619	1.69905						0.555556		64.7904
	Tyrannosaurus	Tyrannosauridae	UCMP 118742	mx09	Smith, 2005	41.3	33.5	72.95	88.32	0.811138	1.76634						0.5		54.9996
	Tyrannosaurus	Tyrannosauridae	UCMP 118742	mx11	Smith, 2005	28.8	19	48.26	54.52	0.659722	1.67569						0.384615		62.0302
	Tyrannosaurus	Tyrannosauridae	UCMP 118742	mx12	Smith, 2005	19.1	14	27.02	34.25	0.732984	1.41466						0.357143		51.8725
Zhuchengtyrannus	Zhuchengtyrannus	Tyrannosauridae	ZCDM V0031/IVPP FV 1794	dt2	Young et al., 2019 (C.H. pers. measurements)	35.08	26.54	69.27	63.05	0.756556	1.97463	23.88	20.3	0.850084	1	1	0.769231		84.7134
	Zhuchengtyrannus	Tyrannosauridae	ZCDM V0031/IVPP FV 1794	dt3	Young et al., 2019 (C.H. pers. measurements)	35.53	24.06	70.56	67.06	0.677174	1.98593	27.94	20.02	0.716535	1	1	0.714286	0.769231	80.5705
	Zhuchengtyrannus	Tyrannosauridae	ZCDM V0031/IVPP FV 1794	dt4	Young et al., 2019 (C.H. pers. measurements)	33.24	25.85	60.65	67.79	0.777677	1.82461	27.41	18.64	0.680044	1	1	0.714286	0.714286	63.3424
	Zhuchengtyrannus	Tyrannosauridae	ZCDM V0031/IVPP FV 1794	dt5	Young et al., 2019 (C.H. pers. measurements)	35.36	25.68	66.21	65.79	0.726244	1.87245	28.12	16.74	0.595306	1	1	0.714286	0.769231	75.1187
	Zhuchengtyrannus	Tyrannosauridae	ZCDM V0031/IVPP FV 1794	dt7	Young et al., 2019 (C.H. pers. measurements)	35.23	23.56	62.54	68.95	0.668748	1.77519	28.35	17.43	0.614815	1	1	0.645161	0.689655	64.5981
	Tyrannosauridae	Tyrannosauridae	BMNH R3683	Isolated	Young et al., 2019 (C.H. pers. measurements)	17.82	13.16	47.12	49.54	0.738496	2.64422	15.58	9.92	0.636714	1	1	0.526316	0.588235	71.7997
Falcarius	Falcarius	Therizinosauria	UMNH VP 14545	mx4	Young et al., 2019 (C.H. pers. measurements)	3.04	2.41	5.34	6.1	0.792763	1.75658	3.37	1.96	0.581602	1	1	0.1		61.0788
	Falcarius	Therizinosauria	UMNH VP 14545	mx5	Young et al., 2019 (C.H. pers. measurements)	3.41	2.33	4.79	5.77	0.683284	1.40469	3.46	1.73	0.5	1	1	0.1	0.111111	56.0494
	Falcarius	Therizinosauria	UMNH VP 14545	mx10	Young et al., 2019 (C.H. pers. measurements)	2.9	1.91	4.25	4.54	0.658621	1.46552	3.28	1.66	0.506098	1	1	0.105263	0.1	65.4058
	Falcarius	Therizinosauria	UMNH VP 14545	mx12	Young et al., 2019 (C.H. pers. measurements)	2.31	1.65	3.74	4.52	0.714286	1.61905	2.55	1.55	0.607843	1	1			55.663
	Falcarius	Therizinosauria	UMNH VP 14545	mx13	Young et al., 2019 (C.H. pers. measurements)	2.33	1.77	4.31	4.48	0.759657	1.84979	2.62	1.74	0.664122	1	1	0.105263	0.105263	70.6328
	Falcarius	Therizinosauria	UMNH VP 14545	mx14	Young et al., 2019 (C.H. pers. measurements)	2.3	1.74	3.53	3.96	0.756522	1.53478	2.51	1.46	0.581673	1	1	0.111111	0.111111	62.1466
	Falcarius	Therizinosauria	UMNH VP 14545	mx15	Young et al., 2019 (C.H. pers. measurements)	2.27	1.68	4.21	3.79	0.740088	1.85463	2.6	1.39	0.534615	1	1	0.111111	0.104167	84.019
	Falcarius	Therizinosauria	UMNH VP 14528	dt?	Young et al., 2019 (C.H. pers. measurements)	3.51	1.9	3.96	4.61	0.541311	1.12821	2.77	1.77	0.638989	1	1	0.166667	0.111111	56.439
Eshanosaurus	Eshanosaurus	Therizinosauria	IVPP V11579	dt13 from start	Young et al., 2019 (C.H. pers. measurements)	1.97	1.57	3.25	3.63	0.796954	1.64975	2.42	1.41	0.582645	1	1	0.285714	0.285714	62.9899
Segnosaurus	Segnosaurus	Therizinosauria	MPC-D 100/80	dt3	Zanno et al., 2016	7.05	5.68	15.07	16.22	0.805674	2.13759						0.555556	0.555556	67.9966
	Segnosaurus	Therizinosauria	MPC-D 100/80	dt9	Zanno et al., 2016	6.59	5.36	17.81	16.24	0.813354	2.70258						0.555556	0.555556	92.686
	Segnosaurus	Therizinosauria	MPC-D 100/80	dt18	Zanno et al., 2016	3.99	3.64	10.06	9.58	0.912281	2.5213						0.555556	0.555556	85.1279
Incisivosaurus	Incisivosaurus	Oviraptorosauria	IVPP V 13326	pmx2	Young et al., 2019 (C.H. pers. measurements)	2.06	1.93	5.22	5.64	0.936893	2.53398				1	1			67.7334
	Incisivosaurus	Oviraptorosauria	IVPP V 13326	dt3	Young et al., 2019 (C.H. pers. measurements)	2.12	1.31	1.8	1.71	0.617925	0.849057				1	1			54.8084
Bambiraptor	Bambiraptor	Dromaeosauridae	AMNH 30556	d06	Young et al., 2019 (C.H. pers. measurements)	2.47	1.42	5.91	7.75	0.574899	2.39271	2.65	1.16	0.437736			0.2		35.3273
	Bambiraptor	Dromaeosauridae	AMNH 30556	d05	Young et al., 2019 (C.H. pers. measurements)	2.77	1.21	5.56	6.68	0.436823	2.00722	2.36	1.03	0.436441			0.166667		54.7061
	Bambiraptor	Dromaeosauridae	AMNH 30556	d07	Young et al., 2019 (C.H. pers. measurements)	2.56	1.28	5.61	6.23	0.5	2.19141	2.23	1.08	0.484305			0.166667		64.1769
	Bambiraptor	Dromaeosauridae	AMNH 30556	mx01	Young et al., 2019 (C.H. pers. measurements)	2.85	1.33	6.13	6.8	0.466667	2.15088	2.22	1.13	0.509009			0.2		64.3378
	Bambiraptor	Dromaeosauridae	AMNH 30556	mx03	Young et al., 2019 (C.H. pers. measurements)	3.3	1.47	6.43	7.1	0.445455	1.94848	2.78	1.18	0.42446			0.206612		64.7958
	Bambiraptor	Dromaeosauridae	AMNH 30556	mx05	Young et al., 2019 (C.H. pers. measurements)	2.64	1.33	6.22	6.66	0.503788	2.35606	2.87	1.12	0.390244			0.153846		68.9391
	Bambiraptor	Dromaeosauridae	AMNH 30556	d06	Smith et al., 2005	2.37	1.41	5.33	7.28	0.594937	2.24895						0.2		28.9118
	Bambiraptor	Dromaeosauridae	AMNH 30556	d08	Smith et al., 2005	2.34	1.41	5.01	6.53	0.602564	2.14103						0.2		41.1365
	Bambiraptor	Dromaeosauridae	AMNH 30556	d09	Smith et al., 2005	2.08	1.4	4.82	5.25	0.673077	2.31731								66.6492
	Bambiraptor	Dromaeosauridae	AMNH 30556	d05	Smith et al., 2005	2.37	1.61	4.91	6.83	0.679325	2.07173						0.166667		29.5695
	Bambiraptor	Dromaeosauridae	AMNH 30556	d07	Smith et al., 2005	2.47	1.24	5.58	6.39	0.502024	2.25911						0.166667		59.9721
	Bambiraptor	Dromaeosauridae	AMNH 30556	mx04	Smith et al., 2005	2.61	1.41	5.99	7.13	0.54023	2.29502						0.2		54.2046
	Bambiraptor	Dromaeosauridae	AMNH 30556	mx06	Smith et al., 2005	2.35	1.2	5.86	6.86	0.510638	2.49362						0.206612		55.5422
	Bambiraptor	Dromaeosauridae	AMNH 30556	mx09	Smith et al., 2005	2.54	0.99	4.62	5.14	0.389764	1.8189						0.153846		63.8035
	Bambiraptor	Dromaeosauridae	AMNH 30556	Isolated	Smith et al., 2005	3.22	1.37	5.66	6.95	0.425466	1.75776						0.21097		53.4805
	Bambiraptor	Dromaeosauridae	AMNH 30556	Isolated	Smith et al., 2005	2.15	1.57	4.03	4.39	0.730233	1.87442								66.0806
Deinonychus	Deinonychus	Dromaeosauridae	YPM 5232 66-11	d1	Young et al., 2019 (C.H. pers. measurements)	5.03	2.99	8.94	10.46	0.594433	1.77734	4.58	2.41	0.526201	1	1	0.30303		58.6228
	Deinonychus	Dromaeosauridae	YPM 5232 66-11	d12	Young et al., 2019 (C.H. pers. measurements)	7.06	3.2	10.44	12.81	0.453258	1.47875	5.63	2.73	0.484902	1	1	0.297619	0.166667	54.5349
	Deinonychus	Dromaeosauridae	YPM 5232 66-11	d13	Young et al., 2019 (C.H. pers. measurements)	6.68	3.02	9.88	12.74	0.452096	1.47904	5.91	2.78	0.470389	1	1	0.285714	0.142857	50.04
	Deinonychus	Dromaeosauridae	YPM 5232 612	d second	Young et al., 2019 (C.H. pers. measurements)	7.25	3.38	11.07	11.72	0.466207	1.5269	5.82	2.87	0.493127	1	1	0.307692		66.6424
	Deinonychus	Dromaeosauridae	YPM 5232 612	d third	Young et al., 2019 (C.H. pers. measurements)	7.06	2.89	9.82	10.65	0.409348	1.39093	5.46	2.58	0.472527	1	1	0.266667	0.142857	63.6126
	Deinonychus	Dromaeosauridae	YPM 5232 612	d fifth	Young et al., 2019 (C.H. pers. measurements)	4.94	2.51	6.23	6.18	0.508097	1.26113	3.71	2.02	0.544474	1	1	0.266667	0.166667	67.0757
	Deinonychus	Dromaeosauridae	YPM 5232 557	d fourth	Young et al., 2019 (C.H. pers. measurements)	9.28	3.26	14.25	14.69	0.351293	1.53556	5.52	3.19	0.577899	1	1	0.37037		68.7422
	Deinonychus	Dromaeosauridae	YPM 5232 557	mx3	Young et al., 2019 (C.H. pers. measurements)	7.26	4.11	15.72	14.97	0.566116	2.16529	5.99	3.41	0.569282	1	1	0.307692	0.181818	82.1493
	Deinonychus	Dromaeosauridae	YPM 5232 609	mx? Isolated	Young et al., 2019 (C.H. pers. measurements)	8.84	3.96	15.28	16.3	0.447964	1.72851	6.25	2.98	0.4768	1	1	0.322581		67.4841
	Deinonychus	Dromaeosauridae	YPM 5232 610C	Isolated	Young et al., 2019 (C.H. pers. measurements)	6.96	2.92	9.78	11.36	0.41954	1.40517	5.35	2.63	0.491589	1	1	0.26096	0.181818	58.8311
	Deinonychus	Dromaeosauridae	YPM 5232 610 full crown no root with spalled surface	Isolated	Young et al., 2019 (C.H. pers. measurements)	8.02	4.63	15.64	15.56	0.577307	1.95012	6.32	3.54	0.560127	1	1	0.333333	0.166667	75.6579
	Deinonychus	Dromaeosauridae	YPM 5232 83	Isolated	Young et al., 2019 (C.H. pers. measurements)	7.91	4.61	16.6	16.87	0.582807	2.09861	6.69	3.63	0.542601	1	1	0.315856		74.4368
	Deinonychus	Dromaeosauridae	YPM 5232 17	Isolated	Young et al., 2019 (C.H. pers. measurements)	9.84	4.8	18.81	19.58	0.487805	1.91159	7.45	4.3	0.577181	1	1	0.3125	0.153846	70.8532
	Deinonychus	Dromaeosauridae	YPM 5232 78	Isolated	Young et al., 2019 (C.H. pers. measurements)	8.24	4.29	13.85	14.82	0.520631	1.68083	6.68	3.87	0.579341	1	1	0.315856	0.181818	66.9292
	Deinonychus	Dromaeosauridae	YPM 5232 285	Isolated	Young et al., 2019 (C.H. pers. measurements)	7.9	4.39	14.49	15.05	0.555696	1.83418	6.31	3.84	0.608558	1	1	0.285714		70.6082
	Deinonychus	Dromaeosauridae	YPM 5232 305	Isolated	Young et al., 2019 (C.H. pers. measurements)	9.14	4.39	15.16	15.63	0.480306	1.65864	6.69	3.63	0.542601	1	1	0.26096	0.153846	69.9381
	Deinonychus	Dromaeosauridae	YPM 5232 66-11	d01	Smith et al., 2005	5.07	3	8.85	10.37	0.591716	1.74556						0.290698	0.201613	58.5143
	Deinonychus	Dromaeosauridae	YPM 5232 66-11	d12	Smith et al., 2005	7.07	3.2	10.07	12.31	0.452617	1.42433						0.285714	0.169492	54.8884
	Deinonychus	Dromaeosauridae	YPM 5232 66-11	d13	Smith et al., 2005	6.76	2.93	9.56	12.29	0.433432	1.4142						0.306748	0.181818	50.6532
	Deinonychus	Dromaeosauridae	YPM 5232 612	d14	Smith et al., 2005	6.74	2.8	9.14	11.78	0.41543	1.35608						0.280899	0.169492	50.6631
	Deinonychus	Dromaeosauridae	YPM 5232 612	d16	Smith et al., 2005	5.35	2.41	6.53	8.35	0.450467	1.22056						0.285714	0.172414	51.4299
	Deinonychus	Dromaeosauridae	YPM 5232 557	d07	Smith et al., 2005	7.15	3.23	11.01	13.5	0.451748	1.53986						0.285714	0.175439	54.4826
	Deinonychus	Dromaeosauridae	YPM 5232 557	d08	Smith et al., 2005	6.36	3.07	10.4	12.1	0.482704	1.63522							0.175439	59.2476
	Deinonychus	Dromaeosauridae	YPM 5232 557	d10	Smith et al., 2005	7.04	3.2	12.23	14.17	0.454545	1.73722						0.285714	0.181818	59.6609
	Deinonychus	Dromaeosauridae	YPM 5232 557	mx01	Smith et al., 2005	7.13	4	13.58	16.14	0.56101	1.90463						0.333333	0.2	56.5333
	Deinonychus	Dromaeosauridae	YPM 5232 557	pm01	Smith et al., 2005	5.74	3.2	11.79	10.8	0.557491	2.05401						0.25		85.1032
	Deinonychus	Dromaeosauridae	MCZ8791	mx03	Smith et al., 2005	6.11	2.58	8.77	13.7	0.422259	1.43535						0.289017	0.178571	27.7868
Dromaeosaurus	Dromaeosaurus	Dromaeosauridae	AMNH 5356	mx3	Hendrickx et al., 2015	7.95	4.84	17.97	21.66	0.608805	2.26038	6.73	4.5	0.668648	1	1	0.285714	0.333333	52.5454
	Dromaeosaurus	Dromaeosauridae	AMNH 5356	mx3	Hendrickx et al., 2015	6.91	4.18	12.34	15.5	0.60492	1.78582	5.71	3.36	0.588441	1	1	0.307692	0.285714	50.6841
	Dromaeosaurus	Dromaeosauridae	AMNH 5356	dt2	Hendrickx et al., 2015	5.99	4.45	12.8	14	0.742905	2.13689	4.8	3.26	0.679167	1	1	0.25	0.285714	66.0665
	Dromaeosaurus	Dromaeosauridae	AMNH 5356	dt3	Hendrickx et al., 2015	6.19	3.97	13.78	13.91	0.641357	2.22617	5.58	3.42	0.612903	1	1	0.315856	0.333333	75.9124
	Dromaeosaurus	Dromaeosauridae	AMNH 5356	dt5	Hendrickx et al., 2015	7.24	4.06	14.77	15.27	0.560773	2.04006	5.91	3.28	0.554992	1	1		0.344828	72.2421
	Dromaeosaurus	Dromaeosauridae	AMNH 5356	dt8	Hendrickx et al., 2015	5.57	3.26	10.14	11.05	0.585278	1.82047	5.18	2.94	0.567568	1	1	0.266667	0.285714	65.8778
	Dromaeosaurus	Dromaeosauridae	AMNH 5356	dt9	Hendrickx et al., 2015	6.18	3.48	9.98	11.37	0.563107	1.61489	5.45	2.9	0.53211	1	1	0.222222		61.1225
	Dromaeosaurus	Dromaeosauridae	AMNH 5356	Isolated, mesial (with long wear facet)	Hendrickx et al., 2015	4.45	4.2	10.87	11.29	0.94382	2.4427	3.59	3.35	0.933148	1	1	0.353107	0.333333	73.1598
	Dromaeosaurus	Dromaeosauridae	AMNH 5356	Isolated, mesial (largest one)	Hendrickx et al., 2015	4.99	5.99	13.15	12.72	1.2004	2.63527	4.28	4.36	1.01869	1	1	0.333333	0.4	83.7701
	Dromaeosaurus	Dromaeosauridae	AMNH 5356	Isolated, mesial (with piece of root)	Hendrickx et al., 2015	4.22	4.15	9.02	10.96	0.983412	2.13744	3.5	3.34	0.954286	1	1	0.333333	0.353107	52.2985
	Dromaeosaurus	Dromaeosauridae	AMNH 5356	mx03	Smith et al., 2005	7.21	4.06	12.86	15.8	0.563107	1.78363						0.294118	0.362319	53.2737
	Dromaeosaurus	Dromaeosauridae	AMNH 5356	mx04	Smith et al., 2005	6.84	3.7	11.58	13.97	0.540936	1.69298						0.25	0.3125	55.6438
	Dromaeosaurus	Dromaeosauridae	AMNH 5356	mx05	Smith et al., 2005	7.64	4.02	12.38	16.37	0.526178	1.62042						0.285714	0.285714	46.2146
	Dromaeosaurus	Dromaeosauridae	AMNH 5356	mx06	Smith et al., 2005	6.28	3.13	10.68	12.4	0.498408	1.70064						0.25	0.265957	59.4616
	Dromaeosaurus	Dromaeosauridae	AMNH 5356	mx02	Smith et al., 2005	6.69	3.32	10.98	12.89	0.496263	1.64126						0.285714	0.285714	58.409
	Dromaeosaurus	Dromaeosauridae	AMNH 5356	mx07	Smith et al., 2005	5.7	3.11	9.7	11	0.545614	1.70175								61.7263
	Dromaeosaurus	Dromaeosauridae	AMNH 5356	d02	Smith et al., 2005	5.46	4.03	9.4	10.5	0.738095	1.72161							0.333333	63.1978
	Dromaeosaurus	Dromaeosauridae	AMNH 5356	d03	Smith et al., 2005	6.09	3.81	11.55	12.34	0.625616	1.89655						0.333333	0.362319	68.1408
	Dromaeosaurus	Dromaeosauridae	AMNH 5356	d04	Smith et al., 2005	6.47	3.91	11.22	13.1	0.604328	1.73416						0.285714	0.294118	58.891
	Dromaeosaurus	Dromaeosauridae	AMNH 5356	d05	Smith et al., 2005	6.56	3.89	11.27	12.99	0.592988	1.71799						0.285714	0.294118	60.1759
	Dromaeosaurus	Dromaeosauridae	AMNH 5356	d08	Smith et al., 2005	5.56	3.27	8.52	10.7	0.588129	1.53237						0.285714	0.294118	52.2688
Velociraptor	Velociraptor	Dromaeosauridae	AMNH 6515	pmx1	Hendrickx et al., 2015	3.74	1.49	6.19	7.29	0.398396	1.65508	3.22	1.65	0.512422	6	1	0.142857		58.0997
	Velociraptor	Dromaeosauridae	AMNH 6515	pmx4	Hendrickx et al., 2015	3.89	1.76	5.9	6.26	0.452442	1.51671	2.68	1.05	0.391791	1	1	0.166667		66.3851
	Velociraptor	Dromaeosauridae	AMNH 6515	mx04	Hendrickx et al., 2015	4.75	1.8	7.89	9.56	0.378947	1.66105	3.83	1.52	0.396867	1	1	0.166667		55.2984
	Velociraptor	Dromaeosauridae	AMNH 6515	dt01	Hendrickx et al., 2015	2.74	1.17	5.12	5.66	0.427007	1.86861	2.32	0.94	0.405172	1	1	0.153846		64.5497
	Velociraptor	Dromaeosauridae	AMNH 6515	mx05	Hendrickx et al., 2015	4.54	1.99	7.95	10.16	0.438326	1.7511	2.11			1	1			48.9082
	Velociraptor	Dromaeosauridae	AMNH 6515	mx08	Hendrickx et al., 2015	4.26	1.74	7.81	9.3	0.408451	1.83333	3.4	1.69	0.497059	1	1	0.181818		56.5795
	Velociraptor	Dromaeosauridae	AMNH 6518	mx first	Young et al., 2019 (C.H. pers. measurements)	5.15	1.97	7.29	8.84	0.382524	1.41553				1	1	0.2		55.537
	Velociraptor	Dromaeosauridae	AMNH 6518	mx second	Young et al., 2019 (C.H. pers. measurements)	5.35	1.9	7.74	8.47	0.35514	1.44673				1	1	0.2		63.4878
	Velociraptor	Dromaeosauridae	AMNH 6518	mx fourth	Young et al., 2019 (C.H. pers. measurements)	4.61	1.63	5.53	6.26	0.353579	1.19957				1	1	0.2		58.8467
	Velociraptor	Dromaeosauridae	AMNH 6518	mx fifth	Young et al., 2019 (C.H. pers. measurements)	4.24	1.7	4.9	6.73	0.400943	1.15566				1	1	0.166667		46.5334
	Velociraptor	Dromaeosauridae	AMNH 6515	pm01	Smith et al., 2005	3.55	1.54	5.85	6.79	0.433803	1.64789							0.166667	59.4777
	Velociraptor	Dromaeosauridae	AMNH 6515	pm03	Smith et al., 2005	3.3	1.54	4.38	5.88	0.466667	1.32727							0.166667	47.3763
	Velociraptor	Dromaeosauridae	AMNH 6515	mx02	Smith et al., 2005	4.17	1.45	6.7	8.42	0.347722	1.60671						0.181818		51.8323
	Velociraptor	Dromaeosauridae	AMNH 6515	mx04	Smith et al., 2005	4.35	2.15	7.91	9.54	0.494253	1.81839						0.166667	0.133333	55.2018
	Velociraptor	Dromaeosauridae	AMNH 6515	mx06	Smith et al., 2005	3.95	1.61	6.93	9.09	0.407595	1.75443						0.2	0.133333	45.6422
	Velociraptor	Dromaeosauridae	AMNH 6515	mx08	Smith et al., 2005	3.11	0.8	4.69	5.08	0.257235	1.50804						0.166667	0.125	64.7423
	Velociraptor	Dromaeosauridae	AMNH 6515	d01	Smith et al., 2005	2.42	1.17	4.25	5.03	0.483471	1.7562						0.166667		57.4606
	Velociraptor	Dromaeosauridae	uncat, GIN	mx01	Smith et al., 2005	4.47	2.79	7.62	9.2	0.624161	1.7047						0.2		55.5247
	Velociraptor	Dromaeosauridae	uncat, GIN	mx03	Smith et al., 2005	6.14	2.46	9.85	12.49	0.400651	1.60423						0.2		50.926
	Velociraptor	Dromaeosauridae	uncat, GIN	mx05	Smith et al., 2005	5.99	2.4	9.93	12.87	0.400668	1.65776						0.25		48.128
	Velociraptor	Dromaeosauridae	uncat, GIN	mx06	Smith et al., 2005	4.72	1.55	6.8	9.13	0.32839	1.44068						0.222222		46.4377
	Velociraptor	Dromaeosauridae	uncat, GIN	mx05	Smith et al., 2005	4.69	1.98	9.44	10.31	0.422175	2.01279								66.1011
	Velociraptor	Dromaeosauridae	uncat, GIN	mx08	Smith et al., 2005	4.59	2	9.25	10.53	0.43573	2.01525						0.2		61.3233
Buitreraptor	Buitreraptor	Dromaeosauridae	MPCA 245 A1	Isolated	Gianechini et al., 2011	2.4	0.8	4.6	6.3	0.333333	1.91667								36.5593
	Buitreraptor	Dromaeosauridae	MPCA 245 A5	Isolated	Gianechini et al., 2011	1.8	0.9	4.2	3.5	0.5	2.33333								99.8247
Unnamned dromaeosaurid	Unnamned dromaeosaurid	Dromaeosauridae	UC indet.	pmx1	Hendrickx et al., 2015	4.8	7.4	12.1	16.6	1.54167	2.52083	5.7	3.8	0.666667	1	1	0.285714		17.2524
	Unnamned dromaeosaurid	Dromaeosauridae	UC indet.	pmx2	Hendrickx et al., 2015	8.6	6.2	20.7	19.8	0.72093	2.40698	6.6	4.1	0.621212	1	1	0.30012		83.6765
	Unnamned dromaeosaurid	Dromaeosauridae	UC indet.	pmx3	Hendrickx et al., 2015	8.8	5.8	18.4	19.3	0.659091	2.09091	6.1	3.6	0.590164	1	1	0.3125		70.8606
	Unnamned dromaeosaurid	Dromaeosauridae	UC indet.	mx1	Hendrickx et al., 2015	12.1	5.1	21	35.8	0.421488	1.73554	9.1	5.2	0.571429	1	1	0.3125
	Unnamned dromaeosaurid	Dromaeosauridae	UC indet.	mx3	Hendrickx et al., 2015	14.3	5.8	30	36.8	0.405594	2.0979	9.8	4.5	0.459184	1	1	0.307692	0.285714	51.2529
	Unnamned dromaeosaurid	Dromaeosauridae	UC indet.	mx4	Hendrickx et al., 2015	10.5	5.5	23	27	0.52381	2.19048	8.1	4	0.493827	1	1	0.333333	0.285714	56.8264
	Unnamned dromaeosaurid	Dromaeosauridae	UC indet.	mx5	Hendrickx et al., 2015	13.1	5.7	26	33.5	0.435115	1.98473	11.3	6.4	0.566372	1	1	0.363636	0.25	45.2549
	Unnamned dromaeosaurid	Dromaeosauridae	UC indet.	mx6	Hendrickx et al., 2015	11	5.3	20.5	22.7	0.481818	1.86364	6.7	3.8	0.567164	1	1	0.294118	0.25	64.3674
	Unnamned dromaeosaurid	Dromaeosauridae	UC indet.	mx7	Hendrickx et al., 2015	11.1	4.8	25	28	0.432432	2.25225	8.7	4.3	0.494253	1	1	0.344828		62.999
Saurornitholestes	Saurornitholestes	Dromaeosauridae	TMP 94.12.844	mx2	Young et al., 2019 (C.H. pers. measurements)	6.18	2.51	12.68	13.15	0.406149	2.05178	5.3	2.18	0.411321	1	1	0.23084		71.9604
	Saurornitholestes	Dromaeosauridae	TMP 94.12.844	mx3	Young et al., 2019 (C.H. pers. measurements)	6.65	2.25	11.85	12.44	0.338346	1.78195	5.43	2.15	0.395948	1	1	0.23084	0.166667	69.2739
	Saurornitholestes	Dromaeosauridae	TMP 94.12.844	mx5	Young et al., 2019 (C.H. pers. measurements)	6.52	2.59	12.18	12.13	0.397239	1.8681	5.29	2.22	0.41966	1	1	0.23084	0.166667	74.8664
	Saurornitholestes	Dromaeosauridae	TMP 88.121.39	dt2	Young et al., 2019 (C.H. pers. measurements)	4.41	2.38	9.09	8.74	0.539683	2.06122	3.58	1.81	0.505587	1	1	0.266667		80.1346
	Saurornitholestes	Dromaeosauridae	TMP 88.121.39	dt9	Young et al., 2019 (C.H. pers. measurements)	5.23	2.13	9.29	9.64	0.407266	1.77629	4.01	1.99	0.496259	1	1	0.235294	0.175439	70.3075
	Saurornitholestes	Dromaeosauridae	TMP 88.121.39	dt11	Young et al., 2019 (C.H. pers. measurements)	5.14	2.28	8.07	8.48	0.44358	1.57004	4.45	2.09	0.469663	1	1	0.222222	0.153846	67.6103
Troodon	Troodon	Troodontidae	DMNH 22837	Isolated, pmx	Hendrickx et al., 2015 (updated)	4.5	4.5	9.8	9.4	1	2.17778	4.3	3.6	0.837209	1	1	0.727273	0.888889	81.4553
	Troodon	Troodontidae	DMNH 22670	Isolated	Hendrickx et al., 2015 (updated)	5.1	3.8	8.8	9.6	0.745098	1.72549	4.2	2.8	0.666667	1	1	0.714286	0.833333	65.4207
	Troodon	Troodontidae	DMNH 22337	Isolated	Hendrickx et al., 2015 (updated)	5.7	4.2	9.8	10.7	0.736842	1.7193	6	3.5	0.583333	1	1	0.577367	0.632111	65.3162
	Troodon	Troodontidae	BMNH R12568	Isolated	Young et al., 2019 (C.H. pers. measurements)	5.66	2.72	8.09	9.74	0.480565	1.42933	4.36	2.06	0.472477	1	1	0.47619	0.47619	56.1251
	Troodon	Troodontidae	MOR 553	Isolated	Smith et al., 2005	4.92	2.43	7.22	8.66	0.493902	1.46748						0.442478	0.25	56.4672
	Troodon	Troodontidae	MOR 553	Isolated	Smith et al., 2005	6	3.03	9.39	10.36	0.505	1.565						0.568182	0.5	63.6615
	Troodon	Troodontidae	MOR 553	Isolated	Smith et al., 2005	5.6	2.71	8.47	8.94	0.483929	1.5125						0.4	0.5	66.7389
	Troodon	Troodontidae	MOR 553	Isolated	Smith et al., 2005	5.2	2.33	7.84	9.74	0.448077	1.50769						0.4	0.4	53.367
	Troodon	Troodontidae	MOR 553	Isolated	Smith et al., 2005	4.45	1.62	7.25	7.36	0.364045	1.62921						0.4		70.9227
Zanabazar	Zanabazar	Troodontidae	GIN 100/1	mx04	Smith et al., 2005	3.58	2.68	5.01	6.92	0.748603	1.39944						0.333333		44.0642
	Zanabazar	Troodontidae	GIN 100/1	mx06	Smith et al., 2005	3.66	2.69	5.51	7.79	0.734973	1.50546						0.5		39.9412
	Zanabazar	Troodontidae	GIN 100/1	mx07	Smith et al., 2005	4.31	2.45	5.61	7.37	0.568445	1.30162						0.5		49.3078
	Zanabazar	Troodontidae	GIN 100/1	mx12	Smith et al., 2005	3.8	2.48	6.45	8.47	0.652632	1.69737						0.333333		46.1707
	Zanabazar	Troodontidae	GIN 100/1	mx14	Smith et al., 2005	4.09	2.51	6.4	7.16	0.613692	1.56479								62.5114
	Zanabazar	Troodontidae	GIN 100/1	mx16	Smith et al., 2005	3.76	2.26	6.23	7.97	0.601064	1.65691						0.4		49.5988
	Zanabazar	Troodontidae	GIN 100/1	mx05	Smith et al., 2005	2.98	2.5	4.28	5.25	0.838926	1.43624						0.5		54.6027
	Zanabazar	Troodontidae	GIN 100/1	mx09	Smith et al., 2005	4.09	2.61	6.33	6.57	0.638142	1.54768						0.5		68.354
Pectinodon	Pectinodon	Troodontidae	BMNH R8403	Isolated	Young et al., 2019 (C.H. pers. measurements)	2.43	0.8	3.88	3.91	0.329218	1.59671				1	1	0.4		71.1531
	Aerosteon	Abelisauridae	MCNA-PV-3137; cast	Isolated	Hendrickx et al., 2015	16.5	8.4	33.3	34.8	0.509091	2.01818	13.4	6.4	0.477612	1	1	0.357143	0.333333	70.9727

## Sheet: observed teeth results
								PC Scores																				Loadings																Confusion Matrix
								Taxa (Genus)	Clade	Specimen	Source		Axis 1	Axis 2	Axis 3	Axis 4	Axis 5	Axis 6	Axis 7	Axis 8	Axis 9	Axis 10	Axis 11	Axis 12	Axis 13	Axis 14			Axis 1	Axis 2	Axis 3	Axis 4	Axis 5	Axis 6	Axis 7	Axis 8	Axis 9	Axis 10	Axis 11	Axis 12	Axis 13	Axis 14			Basalmost Theropoda	Non-averostran Neotheropoda	Non-abelisauroid Ceratosauria	Noasauridae	Abelisauridae
Tooth	Discriminant Function Analysis	Reclassification Rate (RR)	Clade level		Clade level (Eigenvalue)			?	?	DMNH2013-07-1083	This study	1	-3.0194	-1.8842	1.7195	-3.8952	3.4585	-7.108	10.651	6.3759	0.51955	10.335	-20.718	-21.53	-59.692	0		CBL	0.15409	0.02177	0.0057625	-0.032177	-0.034773	-0.0034518	0.0018841	0.014131	0.005409	0.0079158	0.01521	0.0014962	-0.0059622	0		Basalmost Theropoda	21	0	0	0	0
			PC1 (%)	PC2 (%)	Axis 1	Axis 2		?	?	DMNH2013-07-1081	This study	2	-0.1731	-0.05766	0.72973	0.26095	-0.14496	-0.12382	0.49338	-0.19571	-0.19465	1.0775	2.4234	0.45475	1.7197	0		CBW	0.16458	0.013219	0.041461	0.041969	0.011638	-0.0040718	0.040462	0.010467	0.027334	0.0095563	-0.017168	-0.011071	0.016856	0		Non-averostran Neotheropoda	0	20	0	0	0
DMNH2013-07-1083	Basalmost Theropoda	56.7	52.52	19.83	4.751	1.793		?	?	DMNH2014-06-06	This study	3	0.70632	0.70182	0.23496	0.61054	-1.2707	2.4088	-3.1485	-3.2408	-2.1068	-3.0792	9.4321	5.388	20.078	0		CH	0.16107	0.0090049	0.025666	-0.049116	-0.019302	0.0039094	0.069417	-0.0053195	0.020285	-0.017121	-0.0012543	0.00053915	0.0032743	0		Non-abelisauroid Ceratosauria	0	0	7	0	2
DMNH2013-07-1081	Basalmost Theropoda							?	?	DMNH2013-07-1701	This study	4	0.37813	0.40952	-0.10461	0.084464	-0.72994	-0.3017	-2.066	-1.672	0.36312	-2.5916	-2.9481	1.4347	0.97729	0		AL	0.15756	0.0092906	0.018669	-0.053941	-0.018425	-0.0023559	0.05513	0.021382	0.024807	-0.011252	0.00089031	-0.019603	0.012241	0		Noasauridae	0	0	0	7	0
DMNH2014-06-06	Abelisauridae							?	?	SMU77218	This study	5	1.6664	0.16602	-2.0227	0.68781	-6.5599	-1.351	-9.3292	-10.226	3.4027	-13.474	-26.443	1.63	-15.435	0		CBR	0.010487	-0.0085513	0.035699	0.074146	0.046411	-0.00062001	0.038578	-0.0036636	0.021925	0.0016405	-0.032378	-0.012567	0.022818	0		Abelisauridae	0	0	0	0	48
DMNH-07-1701	Basalmost Theropoda							?	?	DMNH2013-07-1080	This study	6	-0.38834	0.40288	0.0063955	-1.2155	-0.61068	-1.1316	-0.41877	0.075374	0.69338	-1.0102	-5.0945	-2.2648	-6.05	0		CHR	0.0069807	-0.012652	0.019883	-0.016846	0.015352	0.0077094	0.067427	-0.019415	0.014725	-0.025148	-0.014657	1.6504e-05	0.01251	0		Non-megalosauran Megalosauroidea	0	0	0	0	2
SMU77218	Basalmost Theropoda							?	?	DMNH2014-06-02	This study	7	-1.3583	0.83108	0.24122	0.10243	-0.30013	-0.59415	-0.46077	0.14827	-1.212	-0.23387	0.4825	-0.24075	-0.30389	0		MCL	0.05539	0.030449	0.041902	-0.071572	0.081316	0.056118	-0.059566	-0.029214	0.039517	0.033231	0.0084179	-0.0032003	-0.0054372	0		Megalosauridae	0	0	2	0	6
DMNH2013-07-1080	Non-megalosauran Megalosauroidea							?	?	SMU73779	This study	8	-5.398	-0.85546	0.67357	0.9356	-3.6195	-2.6377	-0.60411	-1.4493	-0.6982	0.077673	0.66299	-0.66957	-0.094849	0		MCW	0.050085	-0.0075274	-0.010693	-0.040976	0.10076	0.070473	-0.029423	-0.0075301	0.061267	0.04207	-0.013796	0.025837	0.001233	0		Spinosauridae	0	0	0	0	0
DMNH2014-06-02	Megaraptora							?	?	SMU76947	This study	9	-4.6087	-2.4602	3.594	2.0917	-4.0845	5.0605	0.17915	2.4177	-0.34879	-2.9883	1.8551	-1.4197	-1.4302	0		MCR	0.0020788	-0.012454	0.0085319	0.021581	0.013298	0.0035002	0.015015	0.01778	0.026004	0.01762	-0.021487	0.033051	0.0049755	0		Metriacanthosauridae	0	0	0	0	0
SMU73779	Therizinosauria							?	?	SMU73778	This study	10	-6.6472	-0.9324	1.164	2.2339	-3.3159	-3.3934	0.068619	-1.0317	-0.99197	-0.44942	0.0055421	0.53246	-0.043307	0		LAF	0.0019834	-0.043662	0.033031	0.017205	-0.013439	0.043322	-0.011635	0.033351	0.037986	-0.064506	0.046975	0.00074526	-0.030085	0		Allosauridae	0	0	0	0	2
SMU76947	Noasauridae							?	?	SMU76948	This study	11	-5.4192	1.256	0.73432	1.0197	-1.6242	-1.9924	0.22889	1.1452	-2.8462	-1.4785	0.1414	1.2318	-0.59672	0		LIF	0.0038397	-0.057227	0.044484	0.018512	-0.03901	0.08496	0.00011606	0.037558	-0.021876	0.0097508	-0.01902	0.00077663	0.0021519	0		Megaraptora	0	1	0	0	0
SMU73778	Therizinosauria							?	?	DMNH2013-07-1082	This study	12	-3.118	-0.407	0.98798	-0.0059414	-1.6388	-1.174	0.7363	-0.46437	-0.2953	-0.23991	0.27477	-1.1433	0.22987	0		DDL	0.051837	0.070857	-0.0061371	0.020136	-0.018052	0.055178	0.038353	0.0082826	0.046452	0.0011372	0.0010052	-0.0077132	-0.00079918	0		Neovenatoridae	0	0	0	0	0
SMU76948	Therizinosauria							Eoraptor	Basalmost Theropoda	PVSJ 512	Hendrickx et al., 2015	13	-4.4103	0.038088	1.0052	-1.2644	2.2531	0.40957	1.3027	-0.47652	-0.60364	-0.35928	0.017456	0.23341	-0.044321	0		MDL	0.038873	0.064707	-0.0029212	0.012526	0.043132	0.04029	0.040457	0.051027	-0.027989	-0.058203	-0.0010782	0.02293	-0.0091159	0		Carcharodontosauridae	0	0	0	0	1
DMNH-07-1082	Noasauridae							Eoraptor	Basalmost Theropoda	PVSJ 512	Hendrickx et al., 2015	14	-4.6813	1.1852	1.1896	0.78498	2.3822	1.3713	1.8763	-1.3211	0.82651	-0.16949	-0.25478	-2.1831	0.73029	0		CA	0.0065581	-0.0018269	0.01263	0.0071377	0.00067816	0.011043	0.035717	-0.042069	-0.010529	0.0024973	0.014119	0.034774	-0.018389	0		Basal Coelurosauria	2	0	0	0	0
								Eoraptor	Basalmost Theropoda	PVSJ 512	Hendrickx et al., 2015	15	-4.8254	1.3119	0.8854	-0.083951	1.5976	1.7513	2.2621	-1.9256	0.43332	0.19819	0.49621	-0.3012	-0.28121	0																		Non-tyrannosaurid Tyrannosauroidea	7	0	0	1	0
								Eoraptor	Basalmost Theropoda	PVSJ 512	Hendrickx et al., 2015	16	-4.4877	-0.13982	1.0701	-0.53908	2.8678	0.1627	0.47938	-0.2695	-1.1011	-0.37818	-0.0041184	0.10488	-0.011781	0																		Tyrannosauridae	0	0	0	0	4
								Eoraptor	Basalmost Theropoda	PVSJ 512	Hendrickx et al., 2015	17	-4.5602	0.24266	0.90502	0.032795	2.8799	0.20714	-0.099542	0.21047	-0.81438	-0.22122	-0.13147	-0.50595	0.20012	0																		Therizinosauria	0	0	0	0	1
								Eoraptor	Basalmost Theropoda	PVSJ 512	Hendrickx et al., 2015	18	-3.8143	-0.18707	0.84605	-0.11146	2.5769	0.10986	-0.061983	-0.67402	-1.4223	-0.40046	0.077187	0.77038	-0.29988	0																		Oviraptorosauria	0	0	0	0	0
								Eoraptor	Basalmost Theropoda	PVSJ 512	Hendrickx et al., 2015	19	-4.0987	0.25376	0.39466	-1.313	1.8102	0.041968	-0.2486	0.73596	-0.8158	-0.1338	-0.031945	0.79765	-0.23688	0																		Dromaeosauridae	13	1	0	5	0
								Eoraptor	Basalmost Theropoda	PVSJ 512	Hendrickx et al., 2015	20	-3.8209	-0.27197	0.025641	-0.82955	0.57172	-0.26836	-1.0343	0.25855	0.72747	1.1408	0.28107	-0.21567	-0.023838	0																		Troodontidae	0	0	0	0	0
								Eoraptor	Basalmost Theropoda	PVSJ 512	Hendrickx et al., 2015	21	-4.3543	-0.29575	0.60326	-0.6129	1.3987	-0.095243	-0.55339	-0.20352	1.03	-0.068076	-0.92564	-1.3315	0.9773	0																		Total	43	22	9	13	66
								Eoraptor	Basalmost Theropoda	PVSJ 512	Hendrickx et al., 2015	22	-4.63	-0.45508	0.19925	-1.7273	0.82611	-0.38886	-1.0759	0.67369	0.84768	0.49029	-0.46175	-0.2869	0.43976	0
								Eoraptor	Basalmost Theropoda	PVSJ 512	Hendrickx et al., 2015	23	-4.525	0.064077	0.20454	0.97677	2.535	-0.5719	-2.1797	2.0002	-0.65426	2.0839	1.3482	-1.1113	-0.39178	0
								Eoraptor	Basalmost Theropoda	PVSJ 512	Young et al., 2019 (C.H. pers. measurements)	24	-5.0489	1.2117	0.30791	2.1484	3.6684	-0.073027	-2.1179	2.9731	-1.2605	2.1925	1.709	-1.8288	-0.49447	0
								Eoraptor	Basalmost Theropoda	PVSJ 512	Smith & Lamanna, 2006	25	-3.6939	-1.226	1.3563	-1.1734	2.8041	-0.11698	0.59496	-0.16785	-1.8043	-0.66598	0.086283	0.72816	-0.20171	0
								Eoraptor	Basalmost Theropoda	PVSJ 512	Smith & Lamanna, 2006	26	-4.7794	-0.59476	1.5514	-1.0368	2.8832	0.6124	1.4489	-0.5657	-1.0987	-0.52366	0.12281	-0.021594	-0.029137	0
								Eoraptor	Basalmost Theropoda	PVSJ 512	Smith & Lamanna, 2006	27	-5.3381	1.1222	1.1792	-0.57699	1.6181	2.0245	2.5023	-1.1811	0.78861	0.012939	0.19304	-1.0796	0.12131	0
								Eoraptor	Basalmost Theropoda	PVSJ 512	Smith & Lamanna, 2006	28	-4.0283	-0.84464	1.3718	-0.079395	3.1368	0.17502	0.1667	-0.39986	-1.7493	-0.51633	0.13289	0.2279	-0.14535	0
								Eoraptor	Basalmost Theropoda	PVSJ 512	Smith & Lamanna, 2006	29	-5.1162	1.3271	0.82703	-0.45145	1.2522	1.9839	1.6939	-0.91018	0.7254	0.039649	0.10797	-0.63338	-0.0172	0
								Eoraptor	Basalmost Theropoda	PVSJ 512	Smith & Lamanna, 2006	30	-3.6961	-0.5555	1.0015	-0.88676	2.3478	0.033893	0.033063	0.54513	-1.0427	-0.55603	-0.2764	-0.024726	0.16916	0
								Eoraptor	Basalmost Theropoda	PVSJ 512	Smith & Lamanna, 2006	31	-3.8833	-0.30122	0.80893	-0.64299	2.2741	0.1393	-0.40053	0.74171	-1.1599	-0.2566	-0.015837	0.22418	-0.090792	0
								Eoraptor	Basalmost Theropoda	PVSJ 512	Smith & Lamanna, 2006	32	-4.2676	-0.0005037	0.86352	-1.1331	1.8562	0.64899	0.50612	0.12264	-0.65114	-0.35788	-0.064994	0.32661	-0.10394	0
								Eoraptor	Basalmost Theropoda	PVSJ 512	Smith & Lamanna, 2006	33	-3.9741	-0.28315	0.9048	-0.34169	2.5449	0.079699	-0.53902	0.9166	-1.0292	-0.3561	-0.23939	-0.35897	0.20993	0
								Eoraptor	Basalmost Theropoda	PVSJ 512	Smith & Lamanna, 2006	34	-4.1321	-0.20662	0.87591	-0.39038	2.5154	0.15292	-0.54486	0.92836	-1.0348	-0.29546	-0.17255	-0.25336	0.13279	0
								Eoraptor	Basalmost Theropoda	PVSJ 512	Smith & Lamanna, 2006	35	-3.7347	-0.32016	0.82319	-0.25809	2.3937	0.12273	-0.52985	0.61964	-1.2826	-0.17551	0.092355	0.16208	-0.14179	0
								Eoraptor	Basalmost Theropoda	PVSJ 512	Smith & Lamanna, 2006	36	-4.3094	-0.69283	1.1852	-1.8034	2.3847	0.089754	0.50562	0.53107	-0.87287	-1.0102	-0.69779	0.084521	0.40417	0
								Eoraptor	Basalmost Theropoda	PVSJ 512	Smith & Lamanna, 2006	37	-3.3313	-1.1727	1.0026	-1.0274	2.4855	-0.25599	-0.3456	0.018815	-2.1034	-0.6729	0.051371	1.4444	-0.44666	0
								Eoraptor	Basalmost Theropoda	PVSJ 512	Smith & Lamanna, 2006	38	-4.0229	-0.24604	0.62433	-1.0943	2.2034	-0.21381	-1.2214	1.8796	-0.83538	-0.65167	-0.80066	-0.21826	0.48142	0
								Eoraptor	Basalmost Theropoda	PVSJ 512	Smith & Lamanna, 2006	39	-4.6597	1.8249	0.0010773	-0.39717	0.60073	1.5231	-0.26169	1.0165	0.89077	0.40841	-0.101	-0.60304	0.0269	0
								Ischisaurus	Basalmost Theropoda	MACN 18.060	Hendrickx et al., 2015	40	-1.8003	1.1358	0.2128	0.40269	-1.0257	-0.96586	0.57898	1.054	0.21932	0.1153	-0.091544	0.34918	-0.067198	0
								Ischisaurus	Basalmost Theropoda	MACN 18.060	Hendrickx et al., 2015	41	-1.9118	0.071363	0.5068	-0.29853	-0.18171	-1.844	0.62028	1.9983	0.24526	0.030893	-0.7017	1.5886	0.073036	0
								Eodromaeus	Basalmost Theropoda	PVSJ 561	Hendrickx et al., 2015	42	-4.1596	-0.67725	1.4411	-2.0518	-0.63875	-2.8687	1.9266	1.7378	-2.2956	-2.1265	-0.75187	1.0318	0.29465	0
								Coelophysis	Non-averostran Neotheropoda	CM 82931	Hendrickx et al., 2015	43	-4.7993	-2.9197	-11.851	0.076889	-0.61434	3.5616	3.1453	0.2399	1.1043	-2.0554	-1.3323	-0.20806	0.451	0
								Coelophysis	Non-averostran Neotheropoda	CM 82931	Hendrickx et al., 2015	44	-4.2682	-3.3208	-9.1247	0.63498	0.84531	3.2231	5.3792	-1.491	0.47782	-1.2992	0.028794	-1.0758	0.14928	0
								Coelophysis	Non-averostran Neotheropoda	CM 81765	Hendrickx et al., 2015	45	-2.4278	-5.3947	-6.5651	-0.39316	2.7565	0.052331	2.4101	-0.016954	-2.6226	-2.0258	-0.30927	0.78566	0.026952	0
								Coelophysis	Non-averostran Neotheropoda	CM 81765	Hendrickx et al., 2015	46	-2.1437	-6.8382	-7.6155	-0.74753	-0.42151	-0.3359	1.2052	-1.8797	0.30289	-0.11143	0.0011462	0.46233	0.11215	0
								Coelophysis	Non-averostran Neotheropoda	CM 81765	Hendrickx et al., 2015	47	-2.5412	-5.0492	-4.3101	-1.9601	-0.12582	-0.54759	1.5328	-1.5797	0.52467	-0.056236	-0.085839	0.41664	0.2188	0
								Coelophysis	Non-averostran Neotheropoda	CM 81765	Hendrickx et al., 2015	48	-1.6841	-5.4047	-6.4428	-0.71446	-0.61143	-0.48053	0.21784	-1.1432	0.099274	0.11207	0.085547	0.92872	-0.14967	0
								Coelophysis	Non-averostran Neotheropoda	CM 81765	Hendrickx et al., 2015	49	-1.5649	-5.4872	-7.2593	-1.1638	-0.83906	-0.95262	-0.69573	0.68679	0.92839	-0.54415	-1.2372	-0.36677	0.98485	0
								Coelophysis	Non-averostran Neotheropoda	CM 81765	Hendrickx et al., 2015	50	-2.441	-2.8522	-7.7248	-0.090696	-2.5628	1.1414	0.48526	-0.32404	3.1371	0.78505	-0.42674	-1.2811	0.59507	0
								Coelophysis	Non-averostran Neotheropoda	CM 81765	Hendrickx et al., 2015	51	-1.9724	-4.4058	-5.718	-0.32047	-0.43536	-0.73056	-0.61504	0.3223	0.63189	0.94321	0.30233	-0.33551	0.1083	0
								Coelophysis	Non-averostran Neotheropoda	CM 81765	Hendrickx et al., 2015	52	-2.1762	-4.5228	-6.9619	0.46416	-0.15456	-0.45358	-0.73622	0.87431	0.267	1.2764	0.77164	-0.48637	-0.16623	0
								Coelophysis	Non-averostran Neotheropoda	CM 81765	Hendrickx et al., 2015	53	-1.8144	-5.1349	-7.0746	0.30038	-0.14883	-0.78178	-0.78469	0.76002	0.087182	1.1785	0.7256	-0.328	-0.13952	0
								Coelophysis	Non-averostran Neotheropoda	CM 81765	Hendrickx et al., 2015	54	-2.2056	-5.4896	-8.3741	1.0556	-0.13528	0.014187	-0.026696	-0.2249	0.3853	0.65523	0.39582	-0.7026	0.083757	0
								Coelophysis	Non-averostran Neotheropoda	CM 81765	Hendrickx et al., 2015	55	-2.4763	-4.4874	-8.6573	0.50283	1.6717	0.51502	0.62876	1.4212	-2.2739	-1.1957	0.034492	1.0855	-0.43895	0
								Coelophysis	Non-averostran Neotheropoda	CM 81765	Hendrickx et al., 2015	56	-2.2562	-5.1314	-8.6702	1.7032	0.56319	-0.23918	-0.9512	1.3937	0.4417	0.19035	-0.39573	-2.0468	0.87975	0
								Coelophysis	Non-averostran Neotheropoda	CM 81765	Hendrickx et al., 2015	57	-1.1267	-4.5221	-9.4851	4.4458	2.1251	0.76483	-1.9911	-0.4587	-3.11	-1.9441	-0.63724	1.228	-0.36367	0
								Coelophysis	Non-averostran Neotheropoda	CM 81765	Hendrickx et al., 2015	58	-2.5074	-6.0944	-11.253	1.2607	-0.081912	0.21492	-0.28585	1.6452	-0.38575	1.2278	1.2242	-0.29638	-0.5608	0
								Coelophysis	Non-averostran Neotheropoda	CM 81765	Hendrickx et al., 2015	59	-2.4582	-4.9198	-11.053	1.0181	1.195	0.90632	0.22035	1.9566	-2.5173	-0.94173	0.39754	1.6115	-0.89047	0
								Coelophysis	Non-averostran Neotheropoda	CM 81765	Hendrickx et al., 2015	60	-3.6465	-3.3518	-10.213	2.4444	0.83658	3.3581	3.942	-1.7721	0.012314	-1.2781	0.052391	-0.83028	-0.072031	0
								Coelophysis	Non-averostran Neotheropoda	CM 81765	Hendrickx et al., 2015	61	-3.459	-5.9428	-7.0756	-1.2877	0.42423	0.18578	1.9132	-1.2187	0.11235	-0.77697	-0.41998	0.21599	0.36482	0
								Coelophysis	Non-averostran Neotheropoda	CM 81765	Hendrickx et al., 2015	62	-2.3231	-4.6299	-7.3143	0.74125	2.3528	0.33167	1.2689	0.56737	-2.1577	-1.6602	-0.37518	0.24117	0.10842	0
								Dilophosaurus	Non-averostran Neotheropoda	UCMP 37303	Smith et al., 2005	63	0.6811	-0.17181	-0.17386	0.62281	0.20374	-0.55422	-0.8461	0.88426	-0.40108	0.48971	0.35922	-0.29756	-0.14578	0
								Dilophosaurus	Non-averostran Neotheropoda	UCMP 37303	Smith et al., 2005	64	0.65839	-0.16676	-0.079821	0.39787	0.077545	-0.41462	-0.38772	0.54315	-0.16258	0.28863	0.18607	-0.37264	-0.017968	0
								Dilophosaurus	Non-averostran Neotheropoda	UCMP 37303	Smith et al., 2005	65	0.86508	-0.35335	-0.26421	-1.0342	-0.46295	-0.94746	-1.0067	1.6374	0.60757	-0.98312	-1.576	-0.7501	1.1102	0
								Dilophosaurus	Non-averostran Neotheropoda	UCMP 37303	Smith et al., 2005	66	0.78215	-0.021859	-0.28515	0.65636	-0.028721	-0.45631	-0.87699	0.82164	-0.28452	0.54429	0.38213	-0.20681	-0.20421	0
								Dracovenator	Non-averostran Neotheropoda	BP/1/5243	Young et al., 2019 (C.H. pers. measurements)	67	0.45283	0.58614	-0.10502	-0.14785	-1.0185	0.50637	-0.59269	-3.0237	-0.34692	-1.2667	-0.78013	2.4748	-0.50938	0
								Liliensternus	Non-averostran Neotheropoda	MBR 21751/4	Smith et al., 2005	68	-2.6146	-0.71056	-0.43783	-1.2687	-1.1788	-0.42051	-1.5365	0.91345	1.9524	1.8811	0.36149	-0.78445	0.13653	0
								Liliensternus	Non-averostran Neotheropoda	MBR 21751/3	Smith et al., 2005	69	-1.8679	-1.2704	-0.19017	-0.79236	-0.53194	-0.64432	-1.6041	0.072953	0.62024	1.3766	0.52239	0.31579	-0.29611	0
								Liliensternus	Non-averostran Neotheropoda	MBR 21751/8	Smith et al., 2005	70	-2.1757	-1.4021	0.43591	0.84907	0.61954	-0.37005	-1.2911	-1.1472	0.45003	1.1387	0.44319	-0.76927	0.052397	0
								Liliensternus	Non-averostran Neotheropoda	MBR 21751/8	Smith et al., 2005	71	-1.7736	-0.6829	-0.090513	0.079333	-0.36655	-0.031294	-1.2814	-0.82897	0.58058	0.8915	0.27574	0.26545	-0.24671	0
								Liliensternus	Non-averostran Neotheropoda	MBR 21751/8	Smith et al., 2005	72	-1.5131	-0.53545	-0.44119	-0.096323	-0.70203	-0.25151	-1.8513	0.026415	0.55762	1.2702	0.49123	0.45038	-0.42753	0
								Liliensternus	Non-averostran Neotheropoda	MBR 21751/8	Smith et al., 2005	73	-2.1653	-1.2876	0.11554	-0.048383	-0.043548	-0.36921	-1.4259	-0.81813	0.53618	1.1105	0.38549	0.035274	-0.1647	0
								Liliensternus	Non-averostran Neotheropoda	MBR 21751/9	Smith et al., 2005	74	-2.235	-1.9687	0.091752	-1.7558	-0.58939	-0.80382	-1.0619	-0.50733	0.73648	1.0502	0.26096	0.62992	-0.15919	0
								Genyodectes	Non-abelisauroid Ceratosauria	MLP 26-39	Hendrickx et al., 2015	75	1.0882	0.13223	-0.14212	-1.6625	-0.47101	-0.5732	1.4959	0.38891	0.21654	-0.4502	-0.28538	0.30445	0.13999	0
								Genyodectes	Non-abelisauroid Ceratosauria	MLP 26-39	Hendrickx et al., 2015	76	1.4528	0.57472	-0.29552	-2.7736	-0.18301	0.52962	-0.98708	-0.45564	-0.56116	-0.278	0.56191	-1.8481	0.11995	0
								Genyodectes	Non-abelisauroid Ceratosauria	MLP 26-39	Hendrickx et al., 2015	77	0.76386	0.2857	0.48191	-0.67248	0.51128	0.42599	0.89043	-1.5674	0.22928	0.14862	0.42305	-0.87349	0.02179	0
								Genyodectes	Non-abelisauroid Ceratosauria	MLP 26-39	Hendrickx et al., 2015	78	0.44351	-0.28252	-0.54189	-3.1311	-1.5792	-0.78395	0.93755	0.57363	0.82091	-0.077662	-0.32783	1.1999	-0.04689	0
								Genyodectes	Non-abelisauroid Ceratosauria	MLP 26-39	Hendrickx et al., 2015	79	0.10319	0.1532	-0.10194	-0.49045	0.10904	-0.68999	-0.054235	0.69686	0.6856	-0.47943	-0.95122	-0.97793	0.85607	0
								Genyodectes	Non-abelisauroid Ceratosauria	MLP 26-39	Hendrickx et al., 2015	80	0.64337	-0.15939	0.27058	-0.43239	0.50602	-0.53793	-0.0078049	0.06159	1.068	0.62709	-0.26442	-0.1692	0.30974	0
								Genyodectes	Non-abelisauroid Ceratosauria	MLP 26-39	Hendrickx et al., 2015	81	1.4467	0.34083	0.16659	-0.59211	0.64202	0.4192	-0.051377	-1.3397	-0.17318	0.033992	0.29302	-0.041115	-0.20979	0
								Genyodectes	Non-abelisauroid Ceratosauria	MLP 26-39	Hendrickx et al., 2015	82	0.90515	0.48459	0.17258	-1.1636	0.86207	-0.11784	-0.31393	0.47549	-0.16593	-0.23939	-0.17832	-0.77858	0.30891	0
								Genyodectes	Non-abelisauroid Ceratosauria	MLP 26-39	Hendrickx et al., 2015	83	1.047	0.34199	0.076206	-1.0214	0.36263	0.36838	-0.10107	-1.0824	0.024957	0.13617	0.263	0.15744	-0.23732	0
								Ceratosaurus	Non-abelisauroid Ceratosauria	NMNH 4735	Hendrickx et al., 2015	84	0.30761	0.90536	-0.21423	-2.1845	-0.65599	0.21576	-0.40256	-0.054117	-0.60512	-0.25165	0.53681	-0.86163	-0.15766	0
								Ceratosaurus	Non-abelisauroid Ceratosauria	NMNH 4735	Hendrickx et al., 2015	85	0.39258	0.72302	-0.17033	-1.7967	-0.14701	-0.00035942	-0.64789	0.44465	-0.23315	0.015758	0.28793	-0.76767	0.0017769	0
								Ceratosaurus	Non-abelisauroid Ceratosauria	NMNH 4735	Hendrickx et al., 2015	86	0.5332	0.56981	0.04506	-1.4612	-0.21828	0.2034	-0.37209	-0.86649	-0.93042	-0.29823	0.68511	-1.0907	-0.16811	0
								Ceratosaurus	Non-abelisauroid Ceratosauria	NMNH 4735	Hendrickx et al., 2015	87	0.44373	0.97086	0.006697	-1.0485	0.25752	0.12066	0.1267	0.37353	-0.039896	-0.016442	0.053455	0.18867	-0.14652	0
								Ceratosaurus	Non-abelisauroid Ceratosauria	NMNH 4735	Hendrickx et al., 2015	88	0.34041	1.032	0.16682	-0.08901	0.012101	0.39531	-0.26546	-1.294	-1.1659	-0.52801	0.57057	-0.85226	-0.25246	0
								Ceratosaurus	Non-abelisauroid Ceratosauria	NMNH 4735	Hendrickx et al., 2015	89	-0.25477	0.67343	-0.26271	-0.30613	-1.3407	-1.1904	0.064135	1.1493	0.40166	0.14464	-0.50898	2.7846	-0.52365	0
								Ceratosaurus	Non-abelisauroid Ceratosauria	BYU 881 12893	Young et al., 2019 (C.H. pers. measurements)	90	1.6791	1.5283	-0.37392	-2.7291	0.0035426	1.0135	-0.50689	0.12553	-0.1771	-0.93084	-0.20847	-1.7665	0.44609	0
								Ceratosaurus	Non-abelisauroid Ceratosauria	BYU 881 12893	Young et al., 2019 (C.H. pers. measurements)	91	1.457	1.1433	-0.15956	-2.6521	-0.12785	1.0438	-0.013172	-0.95642	-0.93339	-0.65447	0.70956	-1.5229	-0.12638	0
								Ceratosaurus	Non-abelisauroid Ceratosauria	UMNH VP 5278	Young et al., 2019 (C.H. pers. measurements)	92	1.4047	-0.50198	0.57522	0.63338	-2.1655	3.7698	-0.82371	1.8896	-0.77929	3.3572	-2.1703	0.99669	0.40622	0
								Ceratosaurus	Non-abelisauroid Ceratosauria	UMNH VP 5278	Young et al., 2019 (C.H. pers. measurements)	93	1.5119	-0.87781	0.8886	0.53389	-0.87389	3.2148	-0.091642	1.4318	-0.13986	3.0232	-2.1994	1.1064	0.55985	0
								Ceratosaurus	Non-abelisauroid Ceratosauria	UMNH VP 5278	Young et al., 2019 (C.H. pers. measurements)	94	1.4035	-1.4555	1.401	-0.36624	-2.3657	5.3733	-0.014527	0.74861	-1.8441	3.4202	-2.4969	-0.52235	0.91868	0
								Ceratosaurus	Non-abelisauroid Ceratosauria	UMNH VP 5278	Young et al., 2019 (C.H. pers. measurements)	95	1.1077	-0.62615	1.0602	0.55499	-1.4467	4.0421	0.057138	1.1537	-1.1456	2.7278	-2.3909	1.0622	0.51325	0
								Ceratosaurus	Non-abelisauroid Ceratosauria	UMNH VP 5278	Young et al., 2019 (C.H. pers. measurements)	96	1.3349	-0.83084	1.3785	0.0062885	-1.7821	5.2564	0.049354	0.89531	-2.2529	2.9094	-2.2718	-0.75622	0.82951	0
								Ceratosaurus	Non-abelisauroid Ceratosauria	UMNH VP 5278	Young et al., 2019 (C.H. pers. measurements)	97	2.0443	0.31493	-0.10778	-2.3163	0.41857	0.47523	-0.31078	-0.54488	-0.091166	-0.060307	0.30139	-0.84092	0.040898	0
								Ceratosaurus	Non-abelisauroid Ceratosauria	UMNH VP 5278	Young et al., 2019 (C.H. pers. measurements)	98	2.1028	0.5135	-0.24086	-3.0616	0.35121	0.86796	-0.38314	-0.70046	-0.34639	-0.21254	0.46394	-0.81155	-0.10599	0
								Ceratosaurus	Non-abelisauroid Ceratosauria	UMNH VP 5278	Young et al., 2019 (C.H. pers. measurements)	99	1.4478	0.99173	-0.34077	-2.5997	-0.36998	1.149	-0.55537	-1.4616	-0.92401	-0.42603	0.85569	-0.93843	-0.40198	0
								Ceratosaurus	Non-abelisauroid Ceratosauria	UMNH VP 5278	Young et al., 2019 (C.H. pers. measurements)	100	1.1101	0.62548	-0.020197	-1.067	-0.064683	0.60595	-0.385	-1.5405	-0.50314	-0.1233	0.61927	-0.85295	-0.22069	0
								Ceratosaurus	Non-abelisauroid Ceratosauria	UMNH VP 5278	Young et al., 2019 (C.H. pers. measurements)	101	1.6462	-0.91817	1.0625	1.765	-1.85	4.424	-1.4407	-1.8389	-2.2533	1.0789	-3.15	1.4337	0.61977	0
								Ceratosaurus	Non-abelisauroid Ceratosauria	UMNH VP 5278	Young et al., 2019 (C.H. pers. measurements)	102	1.2354	0.80594	-0.2251	-1.0451	-0.1181	0.67964	-0.92823	-1.4503	-0.796	-0.30246	0.50703	-0.25374	-0.39287	0
								Ceratosaurus	Non-abelisauroid Ceratosauria	UMNH VP 5278	Young et al., 2019 (C.H. pers. measurements)	103	0.57397	1.1241	-0.31671	-0.57745	-0.69992	0.6892	-0.96907	-1.6245	-0.55674	-0.46086	0.21066	0.32331	-0.44169	0
								Ceratosaurus	Non-abelisauroid Ceratosauria	UMNH VP 5278	Smith et al., 2005	104	1.529	1.1362	-0.95349	1.4462	-1.2054	0.01919	-1.0574	1.2403	0.81454	1.4158	0.76083	-0.95234	-0.28162	0
								Ceratosaurus	Non-abelisauroid Ceratosauria	UMNH VP 5278	Smith et al., 2005	105	1.6403	0.65833	-0.3983	1.5661	-1.0049	0.40744	-0.014814	-0.99887	0.71051	0.33418	0.15016	-0.52168	-0.073702	0
								Ceratosaurus	Non-abelisauroid Ceratosauria	UMNH VP 5278	Smith et al., 2005	106	1.534	1.1244	-0.42061	0.62032	-0.21064	0.13374	0.073575	1.1426	-0.3277	-0.10046	0.10626	-0.16423	-0.17026	0
								Ceratosaurus	Non-abelisauroid Ceratosauria	UMNH VP 5278	Smith et al., 2005	107	1.1586	0.75107	-0.3379	1.1673	-0.95795	0.49429	0.28817	-0.73601	0.87796	0.4138	0.18655	-0.67594	-0.029741	0
								Ceratosaurus	Non-abelisauroid Ceratosauria	UMNH VP 5278	Smith et al., 2005	108	1.127	1.6457	-0.61725	0.57604	-0.86121	0.54116	0.24001	1.1033	0.70449	0.19835	-0.0036789	-0.77448	0.050271	0
								Ceratosaurus	Non-abelisauroid Ceratosauria	UMNH VP 5278	Smith et al., 2005	109	1.614	0.77024	-0.32365	0.11668	-0.56663	0.14367	0.58966	0.47461	-0.060758	-0.19916	0.036742	0.063051	-0.15358	0
								Ceratosaurus	Non-abelisauroid Ceratosauria	UMNH VP 5278	Smith et al., 2005	110	1.5455	0.31394	-0.53858	-1.511	-1.3896	-0.31598	0.50345	1.1878	0.61499	-0.26346	-0.41807	0.21001	0.15162	0
								Ceratosaurus	Non-abelisauroid Ceratosauria	UMNH VP 5278	Smith et al., 2005	111	1.8508	-0.31797	-0.407	-1.8107	-1.5382	-0.57647	0.79429	0.66858	0.62245	-0.17164	-0.282	0.39124	0.094591	0
								Ceratosaurus	Non-abelisauroid Ceratosauria	UMNH VP 5278	Smith et al., 2005	112	1.2843	-0.18071	-0.59586	-1.6925	-1.5852	-0.54336	0.099542	0.98089	0.62841	0.16951	-0.12321	0.55458	-0.070061	0
								Ceratosaurus	Non-abelisauroid Ceratosauria	UMNH VP 5278	Smith et al., 2005	113	0.69465	0.56232	-0.56255	-0.78459	-1.2071	0.12119	0.12371	0.56215	0.42061	0.17684	0.068257	0.58003	-0.2955	0
								Berberosaurus	Non-abelisauroid Ceratosauria	MNHN Pt369	Hendrickx et al., 2015	114	0.12826	0.1552	-0.11702	-1.8938	-1.274	-0.50696	-0.41201	-0.26415	-0.070393	0.097029	0.47193	-0.97098	0.021908	0
								Berberosaurus	Non-abelisauroid Ceratosauria	MNHN Pt369	Hendrickx et al., 2015	115	0.64262	0.16606	0.25918	-1.6062	-0.057652	-0.19645	0.30804	-0.46045	-0.17227	-0.24645	0.17391	-0.86969	0.17025	0
								Noasaurus	Noasauridae	PVL 4061	Hendrickx et al., 2015	116	-3.7513	1.4788	-0.25103	1.4752	1.7134	0.48916	-2.053	1.0268	-0.69367	1.0247	0.69606	0.054174	-0.61021	0
								Noasaurus	Noasauridae	PVL 4061	Hendrickx et al., 2015	117	-4.5641	-0.097145	0.71739	1.3739	-2.549	-2.3972	0.55024	0.20389	0.42426	0.52967	0.20655	-0.45156	0.15342	0
								Masiakasaurus	Noasauridae	UA 9128 (most mesial tooth)	Hendrickx et al., 2015	118	-4.6688	1.1228	1.4675	2.1806	-0.55832	-0.61572	3.9002	-1.1076	0.51993	0.12448	0.061877	2.0849	-0.58601	0
								Masiakasaurus	Noasauridae	FMNH PR 2696 (small)	Hendrickx et al., 2015	119	-4.3754	-2.6647	3.702	1.2818	-0.51362	1.7692	3.1329	1.5904	-4.9151	1.1132	-2.3054	0.46269	0.85252	0
								Masiakasaurus	Noasauridae	FMNH PR 2182	Hendrickx et al., 2015	120	-4.629	-3.3734	2.8158	1.061	-2.0857	-0.77572	2.1199	0.062196	-1.4734	1.4299	-1.6516	-0.48224	1.1641	0
								Masiakasaurus	Noasauridae	FMNH PR 2471	Hendrickx et al., 2015	121	-3.7783	-3.3885	3.0789	1.7382	-1.4896	0.6486	2.2315	-0.30285	-1.5456	2.13	-1.8708	-0.96139	1.309	0
								Masiakasaurus	Noasauridae	UA 8680	Hendrickx et al., 2015	122	-4.37	-4.1071	2.6328	0.66323	-3.3259	0.50504	1.5767	1.7812	-1.6049	2.7819	-3.4072	4.0678	0.63846	0
								Masiakasaurus	Noasauridae	UA 8680	Hendrickx et al., 2015	123	-3.7438	-0.79172	1.3559	2.0599	-1.8165	-1.1717	-0.50352	0.73566	-3.5755	-1.4225	-2.435	4.1199	-0.13255	0
								Masiakasaurus	Noasauridae	FMNH PR 2221	Hendrickx et al., 2015	124	-3.524	0.66497	0.26008	-0.23743	-2.8921	-1.0232	0.34478	-0.71853	0.075584	0.12289	0.64462	-1.2407	-0.022496	0
								Masiakasaurus	Noasauridae	FMNH PR 2476	Hendrickx et al., 2015	125	-4.8449	0.10701	1.2556	0.47768	-0.42057	-2.3408	0.91558	0.9302	-2.7894	-1.4685	-0.064865	1.628	-0.4341	0
								Masiakasaurus	Noasauridae	FMNH PR 2201	Hendrickx et al., 2015	126	-2.7827	0.97198	0.26048	0.017576	-2.1237	-0.99684	0.57836	0.26016	0.48901	0.085295	0.1359	-1.0679	0.22888	0
								Masiakasaurus	Noasauridae	UA 9091	Hendrickx et al., 2015	127	-4.892	-1.0104	0.85704	0.62096	-2.8538	-2.7809	-0.0069818	-0.39843	0.070805	0.56158	0.59599	-1.722	0.37324	0
								Masiakasaurus	Noasauridae	FMNH PR 2696 (big)	Hendrickx et al., 2015	128	-3.63	0.76568	0.67835	-0.17001	-2.3548	-0.72869	2.2776	-1.1051	0.5856	-0.10203	0.17399	0.57025	-0.23368	0
								Masiakasaurus	Noasauridae	98312-1	Smith et al., 2005	129	-2.5079	0.53142	0.36834	1.8263	1.0202	0.8104	-0.52781	-0.73439	0.48945	0.78357	0.37297	-1.3868	0.078557	0
								Masiakasaurus	Noasauridae	95345-1	Smith et al., 2005	130	-2.6435	-0.89997	-0.17035	-0.23443	-0.3262	-0.18475	-1.9141	-0.4383	0.58863	1.2804	0.44402	0.45598	-0.37365	0
								Masiakasaurus	Noasauridae	99016	Smith et al., 2005	131	-2.1496	-1.3213	0.45052	-1.146	-0.22175	0.11183	0.29535	-1.9947	0.39734	0.289	0.16662	0.94961	-0.30533	0
								Masiakasaurus	Noasauridae	95358	Smith et al., 2005	132	-3.9724	1.2805	0.54743	0.95121	1.2185	1.7445	0.46012	-1.2034	0.24978	0.10883	0.17522	-0.40168	-0.19471	0
								Masiakasaurus	Noasauridae	95244-1	Smith et al., 2005	133	-3.9467	1.3802	0.2363	0.0093984	0.60024	1.6655	0.3336	-0.64299	0.39243	0.13161	0.11369	0.1995	-0.33519	0
								Masiakasaurus	Noasauridae	98313-1	Smith et al., 2005	134	-1.7432	-0.00090905	-0.17543	0.13356	-0.013092	0.21695	-1.2562	-0.1927	-0.019465	0.49998	0.21107	0.64836	-0.41114	0
								Masiakasaurus	Noasauridae	98203	Smith et al., 2005	135	-3.2969	-0.45024	0.37082	-1.1878	-0.8395	0.83265	1.0298	-1.8515	2.1456	0.98597	0.19434	-0.6381	0.149	0
								Masiakasaurus	Noasauridae	93086-4	Smith et al., 2005	136	-2.7894	0.35614	0.1587	-0.57284	0.79004	0.53365	-0.45342	0.30142	-0.54219	0.0070219	0.12141	0.85643	-0.43875	0
								Masiakasaurus	Noasauridae	95435	Smith et al., 2005	137	-2.84	-0.077215	-0.11663	0.089142	0.053204	0.2547	-1.3891	0.041136	0.5355	1.1853	0.50216	-0.018788	-0.32883	0
								Masiakasaurus	Noasauridae	96068-4	Smith et al., 2005	138	-2.977	0.0077503	-0.28976	-0.92464	-1.0392	0.56888	-0.73292	-0.52392	1.4753	1.166	0.28667	0.26286	-0.27233	0
								Arcovenator	Abelisauridae	MHNA.PV.2011.12.15 (holotype)	Young et al., 2019 (C.H. pers. measurements)	139	0.22686	0.14057	0.2412	-0.60189	-0.20399	0.023185	0.64009	-1.2617	0.80851	0.39909	0.030716	0.83526	-0.22766	0
								Arcovenator	Abelisauridae	MHNA.PV.2011.12.187 (referred)	Young et al., 2019 (C.H. pers. measurements)	140	0.78176	-0.11021	0.179	-1.7014	-0.29762	0.033735	0.4244	-1.1728	0.5632	0.29964	0.30161	-0.42541	0.01003	0
								Abelisaurus	Abelisauridae	MC 1	Hendrickx et al., 2015	141	-1.0976	1.7383	0.02888	1.3187	-0.42255	-0.00042277	-0.39811	-0.097218	-0.54657	-0.13729	0.20397	0.01765	-0.32317	0
								Abelisaurus	Abelisauridae	MC 5	Hendrickx et al., 2015	142	-0.50241	1.7666	0.12943	0.41584	-0.3103	0.68731	0.30608	-1.0153	-0.44698	-0.3462	0.38902	-0.66817	-0.23516	0
								Abelisaurus	Abelisauridae	MC 267	Hendrickx et al., 2015	143	-1.3011	2.7673	-0.48051	1.7213	-1.071	0.41073	-1.1749	0.32199	-0.62413	-0.066758	0.35536	-0.075637	-0.52722	0
								Abelisaurus	Abelisauridae	MC 689	Hendrickx et al., 2015	144	0.86644	1.6069	-0.86088	0.72669	-0.61505	0.10415	-1.872	0.55118	0.55501	0.42755	-0.44803	2.1319	-0.57892	0
								Abelisaurus	Abelisauridae	MC 709 (230)	Hendrickx et al., 2015	145	0.76406	0.48254	-0.1918	0.60922	0.15548	-0.22397	-1.4432	-0.21941	0.11306	0.85608	0.46728	-0.31279	-0.2314	0
								Rugops	Abelisauridae	MNN IGU1	Smith & Lamanna, 2006	146	-0.98297	1.3263	-0.92705	0.066532	-0.78907	0.38157	-1.4373	1.7798	0.30595	1.2563	0.73856	0.38215	-0.70411	0
								Indosuchus	Abelisauridae	AMNH 1753	Hendrickx et al., 2015	147	0.054473	2.4229	-0.22731	2.3035	1.0061	0.37228	-0.035342	1.8993	1.7435	1.2804	-0.43447	0.83852	-0.11223	0
								Indosuchus	Abelisauridae	AMNH 1753	Hendrickx et al., 2015	148	0.81958	1.3273	0.053622	1.268	0.87585	0.38716	-0.038137	-0.19096	0.55123	0.35105	-0.24539	0.81248	-0.20997	0
								Indosuchus	Abelisauridae	AMNH 1753	Hendrickx et al., 2015	149	0.57026	1.575	-0.14101	0.55278	0.62476	0.45723	-0.48314	0.16807	-0.13965	0.082686	-0.022783	0.73984	-0.37652	0
								Indosuchus	Abelisauridae	AMNH 1753	Hendrickx et al., 2015	150	0.71393	1.6213	-0.027074	0.78364	1.0119	0.29075	-0.24415	1.0825	0.81482	0.50037	-0.24381	-0.71957	0.25972	0
								Indosuchus	Abelisauridae	AMNH 1753	Smith et al., 2005	151	0.9178	0.73946	-0.64261	0.26144	-0.64034	0.15343	-0.93667	0.36985	-0.58943	-0.25535	-0.053226	1.3097	-0.55765	0
								Indosuchus	Abelisauridae	AMNH 1753	Smith et al., 2005	152	1.1836	0.52384	-0.2736	1.9968	-0.039734	0.20009	-0.91479	-0.61323	-0.34067	-0.0016258	0.064506	-0.051312	-0.20885	0
								Indosuchus	Abelisauridae	AMNH 1753	Smith et al., 2005	153	0.9242	0.22824	-0.12239	0.96917	0.40339	-0.12692	-0.63901	0.1905	-0.98853	-0.24304	0.10294	0.46605	-0.33066	0
								Indosuchus	Abelisauridae	AMNH 1753	Smith et al., 2005	154	1.1397	-0.25264	-0.020457	1.3835	0.33958	-0.44822	-0.68312	0.058515	-0.42464	0.33174	0.30541	-0.53372	-0.062154	0
								Indosuchus	Abelisauridae	AMNH 1753	Smith et al., 2005	155	0.49601	0.39851	0.28795	0.91958	1.3057	-0.046701	0.14727	0.6749	-1.2738	-0.49894	0.080468	-0.194	-0.10145	0
								Indosuchus	Abelisauridae	AMNH 1753	Smith et al., 2005	156	0.83453	0.99863	-0.010986	1.234	0.39492	0.60188	0.35969	-0.37015	-0.75778	-0.55245	0.028054	0.26484	-0.3025	0
								Chenanisaurus	Abelisauridae	OCP 457	Longrich et al., 2017	157	1.1633	1.2389	-0.17062	0.601	-0.20248	0.58843	0.9431	0.22939	-0.048001	-0.29524	0.049882	-0.26618	-0.11465	0
								Chenanisaurus	Abelisauridae	OCP 458	Longrich et al., 2017	158	1.5844	-0.73655	0.2571	0.86374	0.20164	-0.42935	0.27899	-0.99501	-0.51058	-0.14838	0.15786	-0.063991	-0.072085	0
								Chenanisaurus	Abelisauridae	WDC-CCPM-005	Buffetaut et al., 2005	159	0.68641	0.74328	-0.29582	-0.35862	-0.64693	0.35826	0.60639	0.21797	0.050453	-0.16374	0.04238	0.47069	-0.27955	0
								Majungasaurus	Abelisauridae	FMNH PR 2100	Young et al., 2019 (C.H. pers. measurements)	160	0.0089524	2.2369	-0.021548	2.3451	0.66987	0.12167	-0.015392	0.99736	0.17124	0.18725	-0.3385	1.0311	-0.30047	0
								Majungasaurus	Abelisauridae	FMNH PR 2100	Young et al., 2019 (C.H. pers. measurements)	161	0.74478	1.8795	0.0010231	1.8097	0.60114	0.6582	-0.13163	-0.72991	-0.085965	-0.39924	-0.45853	1.1955	-0.33178	0
								Majungasaurus	Abelisauridae	FMNH PR 2100	Young et al., 2019 (C.H. pers. measurements)	162	0.25538	2.676	-0.65052	1.2826	-0.77687	0.83933	-0.71439	-0.17004	0.36603	-0.50417	-0.80804	2.2253	-0.53883	0
								Majungasaurus	Abelisauridae	FMNH PR 2100	Young et al., 2019 (C.H. pers. measurements)	163	0.72601	2.3875	-0.51947	1.1445	-1.0396	1.8626	-0.89881	-3.86	-0.2927	-2.6432	-2.1112	4.5243	-0.67578	0
								Majungasaurus	Abelisauridae	FMNH PR 2100	Young et al., 2019 (C.H. pers. measurements)	164	0.54679	1.6158	-0.15933	-0.6161	0.16899	0.71484	-0.092603	-0.025862	-0.14273	-0.012563	0.30075	-0.32918	-0.23836	0
								Majungasaurus	Abelisauridae	FMNH PR 2100	Young et al., 2019 (C.H. pers. measurements)	165	0.61198	1.7076	-0.12478	-0.47975	-0.019924	0.92761	0.029068	-0.64415	-0.27663	-0.16125	0.43205	-0.66905	-0.24666	0
								Majungasaurus	Abelisauridae	FMNH PR 2100	Young et al., 2019 (C.H. pers. measurements)	166	0.33732	2.3765	-0.48713	-0.77223	-0.33801	0.88954	-0.2851	0.83465	0.079	0.10486	0.36035	-0.81332	-0.18963	0
								Majungasaurus	Abelisauridae	FMNH PR 2100	Young et al., 2019 (C.H. pers. measurements)	167	0.49619	2.0022	-0.23467	-0.70401	-0.2279	0.97195	0.059152	-0.22516	-0.23919	-0.1783	0.44331	-0.83169	-0.22378	0
								Majungasaurus	Abelisauridae	FMNH PR 2100	Young et al., 2019 (C.H. pers. measurements)	168	-1.153	2.4542	0.032638	2.3517	-0.13318	0.16667	0.4711	0.59375	0.50114	0.030399	-0.48911	1.3246	-0.31617	0
								Majungasaurus	Abelisauridae	FMNH PR 2100	Young et al., 2019 (C.H. pers. measurements)	169	-0.1182	1.6291	0.2166	0.16245	0.43501	0.48212	0.55688	0.05858	0.06542	-0.10136	0.079544	-0.72695	0.042843	0
								Majungasaurus	Abelisauridae	FMNH PR 2100	Young et al., 2019 (C.H. pers. measurements)	170	-0.14642	1.8191	-0.074473	-0.014499	-0.04149	0.47034	-0.063568	0.23015	-0.31985	-0.049459	0.35559	-0.63569	-0.19391	0
								Majungasaurus	Abelisauridae	FMNH PR 2100	Young et al., 2019 (C.H. pers. measurements)	171	-0.49039	1.9824	-0.094345	0.038137	-0.15586	0.47452	-0.20267	0.43957	-0.28793	0.020847	0.45269	-1.2603	-0.076524	0
								Majungasaurus	Abelisauridae	FMNH PR 2100	Young et al., 2019 (C.H. pers. measurements)	172	-0.56727	1.8811	-0.14681	0.17283	-0.4571	0.5315	-0.35228	-0.02227	-0.11905	0.22391	0.60898	-1.3685	-0.13339	0
								Majungasaurus	Abelisauridae	FMNH PR 2100	Young et al., 2019 (C.H. pers. measurements)	173	-0.80582	1.8182	-0.29554	-0.52866	-0.69037	0.13839	-1.2342	1.0797	0.74891	-0.37025	-0.61778	-2.4714	0.90557	0
								Majungasaurus	Abelisauridae	FMNH PR 2100	Young et al., 2019 (C.H. pers. measurements)	174	-0.65047	1.7017	-0.088899	0.27033	-0.44559	0.4515	-0.46611	-0.4086	-0.5276	-0.033225	0.56103	-0.80336	-0.28924	0
								Majungasaurus	Abelisauridae	FMNH PR 2100	Young et al., 2019 (C.H. pers. measurements)	175	-0.5903	2.2039	0.1208	1.197	0.0040241	0.72196	0.99018	-0.37397	0.43866	-0.17151	-0.29342	1.126	-0.35986	0
								Majungasaurus	Abelisauridae	FMNH PR 2100	Young et al., 2019 (C.H. pers. measurements)	176	-0.09733	2.0436	-0.084024	0.9838	-0.096763	0.62797	-0.049408	-0.34509	-0.15552	-0.14612	0.098835	0.10204	-0.31543	0
								Majungasaurus	Abelisauridae	FMNH PR 2100	Young et al., 2019 (C.H. pers. measurements)	177	0.1397	2.2227	-0.36834	0.84977	-0.6223	0.82173	-0.72866	-0.76933	-0.45659	-0.4139	0.11314	0.15951	-0.42449	0
								Majungasaurus	Abelisauridae	FMNH PR 2100	Young et al., 2019 (C.H. pers. measurements)	178	-0.0040808	2.2717	-0.25914	0.76723	-0.13304	0.50539	-0.51867	0.38407	-0.73254	-0.12422	0.42203	-0.32002	-0.40825	0
								Majungasaurus	Abelisauridae	FMNH PR 2100	Young et al., 2019 (C.H. pers. measurements)	179	-0.087827	1.7781	0.003349	0.26472	-0.11333	0.51344	0.067706	-0.29843	-0.4965	-0.23827	0.3477	-0.47704	-0.25448	0
								Majungasaurus	Abelisauridae	FMNH PR 2100	Young et al., 2019 (C.H. pers. measurements)	180	-0.16335	1.4468	0.11994	0.26033	0.22527	0.38006	0.13081	-0.046816	0.23108	0.17606	0.19621	-0.90219	0.041218	0
								Majungasaurus	Abelisauridae	FMNH PR 2100	Young et al., 2019 (C.H. pers. measurements)	181	-0.45926	1.6017	-0.051391	-0.42748	-0.10725	0.28311	-0.18286	0.61065	0.23112	0.03455	0.077155	-1.2002	0.18476	0
								Majungasaurus	Abelisauridae	FMNH PR 2100	Young et al., 2019 (C.H. pers. measurements)	182	-0.65482	1.5525	0.047096	0.38664	-0.29786	0.37511	-0.30428	-0.5779	-0.61838	-0.13896	0.51739	-0.8352	-0.24018	0
								Majungasaurus	Abelisauridae	FMNH PR2008	Smith et al., 2005	183	0.09386	0.19853	0.30669	0.24464	0.39982	0.23762	0.93485	-0.27713	-0.11891	-0.18457	0.079217	-0.41597	0.027649	0
								Majungasaurus	Abelisauridae	UA 8716	Smith et al., 2005	184	-0.023801	0.86088	0.12731	0.80296	0.23343	0.73116	0.81108	-0.53494	-0.043691	-0.15935	0.13557	-0.27845	-0.13963	0
								Majungasaurus	Abelisauridae	UA 8716	Smith et al., 2005	185	-0.2103	0.69964	0.11656	-0.043185	0.21837	0.42885	0.8262	0.30397	0.065685	-0.25002	-0.081852	-0.40319	0.071851	0
								Majungasaurus	Abelisauridae	FMNH PR2100	Smith et al., 2005	186	-0.013601	1.0007	0.44735	0.76203	0.74616	0.76096	1.6341	-0.18473	0.066155	-0.42282	-0.048933	-1.1806	0.26307	0
								Majungasaurus	Abelisauridae	FMNH PR2100	Smith et al., 2005	187	0.24386	1.8718	-0.23429	1.309	-0.97422	2.782	-1.1631	-0.204	-1.1538	-1.0788	12.85	6.9032	23.526	0
								Majungasaurus	Abelisauridae	FMNH PR2100	Smith et al., 2005	188	0.38488	1.3435	-0.47012	-0.6462	-0.79938	0.69809	0.68765	0.57908	0.024057	-0.29397	-0.0055937	0.82295	-0.42024	0
								Majungasaurus	Abelisauridae	FMNH PR2100	Smith et al., 2005	189	0.47663	1.1204	-0.40053	-0.4494	-0.86562	0.66091	0.73875	0.16032	0.20318	-0.18819	0.028702	0.63539	-0.36122	0
								Majungasaurus	Abelisauridae	FMNH PR2100	Smith et al., 2005	190	-0.56974	1.8227	-0.34229	-0.39653	-0.71645	1.7158	0.46776	1.1839	-0.41051	0.23057	6.4981	3.2483	9.8299	0
								Majungasaurus	Abelisauridae	FMNH PR2100	Smith et al., 2005	191	0.44263	0.94427	-0.48848	-0.80556	-0.82079	0.23221	0.29379	1.1577	0.32055	-0.042432	-0.090851	0.2366	-0.12856	0
								Majungasaurus	Abelisauridae	FMNH PR2100	Smith et al., 2005	192	0.32149	1.0919	-0.37723	-0.89422	-0.86146	0.46559	0.80996	0.85587	0.57785	-0.21092	-0.228	0.026271	0.0074585	0
								Majungasaurus	Abelisauridae	FMNH PR2100	Smith et al., 2005	193	-0.098376	1.3743	-0.6999	-0.86796	-1.2275	0.76149	0.16364	0.58115	0.31091	-0.03669	0.014375	1.1396	-0.53894	0
								Majungasaurus	Abelisauridae	FMNH PR2100	Smith et al., 2005	194	-1.7633	1.0378	-0.37725	-0.3562	-0.21812	0.76737	-0.62398	0.41865	-0.084205	0.13849	0.11102	1.0217	-0.5579	0
								Majungasaurus	Abelisauridae	FMNH PR2100	Smith et al., 2005	195	-0.90749	1.4949	0.21914	1.1636	0.52122	1.354	1.0681	-0.8109	0.0094558	-0.23154	0.15515	-0.375	-0.19793	0
								Majungasaurus	Abelisauridae	FMNH PR2100	Smith et al., 2005	196	-0.14873	1.064	-0.19809	0.3781	-0.27181	0.56689	0.33179	0.4319	0.56093	0.16928	0.013052	-0.6751	0.061073	0
								Majungasaurus	Abelisauridae	FMNH PR2100	Smith et al., 2005	197	-0.00016187	0.84406	-0.32939	0.13573	-0.39185	0.42976	-0.057268	0.32524	0.056084	0.10511	0.12842	0.28262	-0.3003	0
								Majungasaurus	Abelisauridae	FMNH PR2100	Smith et al., 2005	198	-0.38887	1.185	-0.46358	0.52404	-0.49301	0.56755	-0.35134	0.67417	0.5326	0.588	0.28195	-0.35727	-0.21165	0
								Majungasaurus	Abelisauridae	FMNH PR2100	Smith et al., 2005	199	-0.49268	1.0363	-0.45357	0.15352	-0.35941	0.30689	-0.47482	1.2896	0.48049	0.60189	0.22109	-0.49088	-0.10263	0
								Majungasaurus	Abelisauridae	FMNH PR2100	Smith et al., 2005	200	-0.53499	1.1008	-0.47981	0.31211	-0.26854	0.26024	-0.64167	1.5505	0.49893	0.72567	0.26848	-0.71228	-0.064714	0
								Majungasaurus	Abelisauridae	FMNH PR2100	Smith et al., 2005	201	-0.69505	1.1101	-0.53651	0.4241	-0.36451	0.28411	-0.78889	1.5354	0.64176	0.98902	0.41811	-0.79294	-0.12226	0
								Majungasaurus	Abelisauridae	FMNH PR2100	Smith et al., 2005	202	-1.236	0.98616	-0.35933	0.47229	-0.43793	0.58242	-0.48138	0.57231	0.97525	0.90626	0.30752	-0.80685	-0.054616	0
								Majungasaurus	Abelisauridae	FMNH PR2100	Smith et al., 2005	203	-0.17594	1.7151	-0.046221	1.6313	0.1722	1.5251	0.4666	-1.4805	-0.3889	-0.79229	-0.18327	0.60428	-0.40516	0
								Majungasaurus	Abelisauridae	FMNH PR2100	Smith et al., 2005	204	-0.090314	1.5319	-0.3989	0.77918	-0.25684	0.80584	-0.027813	0.51691	0.16694	0.17252	0.17873	-0.16077	-0.26751	0
								Majungasaurus	Abelisauridae	FMNH PR2100	Smith et al., 2005	205	-0.033213	1.2958	-0.39851	0.41767	-0.32834	0.72398	-0.075907	0.29188	-0.1059	-0.069473	0.08644	0.46638	-0.39844	0
								Majungasaurus	Abelisauridae	FMNH PR2100	Smith et al., 2005	206	-0.04822	0.95389	-0.1782	0.16502	-0.049927	0.56008	0.2569	0.21705	-0.27977	-0.20783	0.067952	0.42928	-0.33047	0
								Majungasaurus	Abelisauridae	FMNH PR2100	Smith et al., 2005	207	-0.15081	0.98043	-0.14714	0.59729	-0.065842	0.49984	0.19255	0.42693	0.39013	0.19442	0.069539	-0.71186	0.041031	0
								Majungasaurus	Abelisauridae	FMNH PR2100	Smith et al., 2005	208	-0.35597	1.2985	-0.44627	0.15423	-0.63841	0.75108	0.049382	0.41592	0.48189	0.27215	0.14427	0.044014	-0.27054	0
								Majungasaurus	Abelisauridae	FMNH PR2100	Smith et al., 2005	209	-0.77371	0.86959	-0.32776	-0.17533	-0.27092	0.37454	-0.25191	0.93189	0.30267	0.36774	0.14867	-0.076223	-0.17921	0
								Majungasaurus	Abelisauridae	FMNH PR2100	Smith et al., 2005	210	-0.68398	1.0418	-0.67252	-0.57641	-0.7397	0.31714	-0.65204	1.4454	0.27133	0.61119	0.32055	0.483	-0.4597	0
								Majungasaurus	Abelisauridae	FMNH PR2278	Smith et al., 2005	211	0.21187	0.96151	-0.26173	-0.73895	-0.76817	0.59918	1.0287	0.24317	0.38721	-0.15647	-0.0047235	0.33014	-0.20937	0
								Majungasaurus	Abelisauridae	FMNH PR2278	Smith et al., 2005	212	0.22636	0.65999	-0.33342	-0.78743	-0.90765	0.22121	0.48432	0.68818	0.83449	0.0079164	-0.24981	-0.28451	0.15903	0
								Aucasaurus	Abelisauridae	MCF-PVPH-236	Hendrickx et al., 2015	213	1.0703	-0.1594	0.39387	-0.08516	0.55697	-0.45383	-0.14652	-0.95878	-0.66195	-0.085436	0.28119	-0.14671	-0.11138	0
								Aucasaurus	Abelisauridae	MCF-PVPH-236	Hendrickx et al., 2015	214	-0.66388	1.7232	-0.65697	-1.1298	-1.3777	0.11805	-1.2252	0.87856	-0.59607	0.55657	1.1103	-0.78683	-0.58197	0
								Skorpiovenator	Abelisauridae	MMCH-PV 48	Hendrickx et al., 2015	215	0.22914	0.28619	0.38217	0.17067	0.12383	-0.021859	0.050078	-1.5974	-0.46039	-0.19718	0.25619	-0.053375	-0.1911	0
								Skorpiovenator	Abelisauridae	MMCH-PV 48	Hendrickx et al., 2015	216	0.28756	0.44914	-0.052925	-2.3528	-0.86264	0.18889	0.31909	-0.83969	-0.14284	-0.15807	0.41481	0.077522	-0.29652	0
								Carnotaurus	Abelisauridae	MACN-CH 894	Hendrickx et al., 2015	217	0.42904	-0.09932	0.11698	0.47984	0.40513	-0.35291	0.48763	-0.97952	-0.21882	-0.027134	0.13016	0.030612	-0.073763	0
								Carnotaurus	Abelisauridae	MACN-CH 894	Hendrickx et al., 2015	218	0.53645	-0.052016	-0.085982	0.11292	-0.17821	-0.10866	0.34458	-1.7425	-0.33421	-0.43207	-0.10046	1.2169	-0.35436	0
								Carnotaurus	Abelisauridae	MACN-CH 894	Hendrickx et al., 2015	219	0.17583	0.093044	-0.03786	0.20427	0.28126	-0.39169	0.23578	-0.33837	-0.05703	0.11344	0.10199	-0.06429	-0.033062	0
								Carnotaurus	Abelisauridae	MACN-CH 894	Hendrickx et al., 2015	220	-0.3057	0.34266	-0.11801	-0.087792	0.35334	-0.53876	-0.20255	0.77738	0.46345	-0.036405	-0.46718	-0.93028	0.54863	0
								Abelisauridae	Abelisauridae	MUCPv 641	Hendrickx et al., 2015	221	-1.2188	1.7743	-0.11125	-0.78076	-1.1157	0.23371	0.10684	0.20001	-0.34591	-0.19308	0.47775	-0.88382	-0.17873	0
								Abelisauridae	Abelisauridae	MUCPv 482	Hendrickx et al., 2015	222	-1.059	1.2637	-0.072776	-0.51244	-1.6042	0.51852	-0.28551	-2.0782	-0.72435	-0.78361	0.31283	0.032773	-0.42337	0
								Abelisauridae	Abelisauridae	MHNA.PV.2008.1.43	Young et al., 2019 (C.H. pers. measurements)	223	0.040858	-0.19631	0.816	-0.86777	0.40654	-0.070144	1.3355	-1.6164	-0.078088	-0.033416	0.48547	-1.1196	0.1283	0
								Abelisauridae	Abelisauridae	MHNA.PV.2011.12.7	Young et al., 2019 (C.H. pers. measurements)	224	-0.16025	0.76529	0.42233	-0.8322	-0.3213	0.68741	1.1423	-2.1341	-0.29968	-0.28187	0.62352	-0.51065	-0.29205	0
								Abelisauridae	Abelisauridae	NHM R4190	Young et al., 2019 (C.H. pers. measurements)	225	0.14867	2.1333	-0.24807	-0.024268	-0.080026	0.81208	-0.57201	-0.15259	-1.0707	-0.38965	0.56533	-0.57775	-0.43464	0
								Abelisauridae	Abelisauridae	MACN 18172	Young et al., 2019 (C.H. pers. measurements)	226	-0.69074	0.79383	0.36909	-1.04	-0.84859	-0.16257	0.82872	-0.78185	-0.82693	-0.61041	0.50115	-0.95366	-0.07711	0
								Abelisauridae	Abelisauridae	UCPC 10	Hendrickx et al., 2015	227	-0.83857	0.95753	0.16497	-0.52432	-0.5244	-0.49327	0.33724	0.67701	0.17591	-0.065672	-0.087586	-0.34926	0.12654	0
								Abelisauridae	Abelisauridae	UCPC 10	Smith & Lamanna, 2006	228	-0.15672	0.31698	-0.25293	-0.34342	-0.31072	0.15236	-0.24405	0.21983	-0.2537	-0.020643	0.083533	0.82104	-0.3943	0
								Abelisauridae	Abelisauridae	MGUP MEGA002	Smith & Lamanna, 2006	229	-0.20956	1.0448	-0.5183	0.63549	0.21125	0.099348	-1.1326	1.7261	-0.59695	0.59462	0.54572	0.1796	-0.52841	0
								Abelisauridae	Abelisauridae	MCPM 13693	Smith & Vechia, 2006	230	0.72565	-0.086407	-0.16179	0.67388	-0.13354	-0.14811	-0.57528	-0.28159	-0.34423	0.066678	0.12573	0.33778	-0.25604	0
								Monolophosaurus	Non-megalosauran Megalosauroidea	IVPP 84019	Hendrickx et al., 2020	231	0.75594	-0.78177	0.58888	0.045529	0.95361	-1.0633	0.26937	-0.42463	-0.091493	0.17071	-0.26679	1.6538	-0.20351	0
								Monolophosaurus	Non-megalosauran Megalosauroidea	IVPP 84019	Hendrickx et al., 2020	232	0.85922	-0.5488	0.28106	-1.5161	0.18185	-0.81222	0.031309	-0.033188	0.17166	0.1477	-0.052648	0.023087	0.14205	0
								Monolophosaurus	Non-megalosauran Megalosauroidea	IVPP 84019	Hendrickx et al., 2020	233	-0.31871	0.67168	-1.1086	-1.1932	-0.71752	-1.2017	-1.8901	3.5335	0.83698	1.118	-0.045332	-0.63218	0.24462	0
								Monolophosaurus	Non-megalosauran Megalosauroidea	IVPP 84019	Hendrickx et al., 2020	234	-0.21143	-0.50074	-0.28269	-1.0981	-0.40752	-0.83445	-0.24858	0.11084	0.27228	0.42302	0.083959	0.52907	-0.11645	0
								Monolophosaurus	Non-megalosauran Megalosauroidea	IVPP 84019	Hendrickx et al., 2020	235	-0.0046424	-0.12866	-0.20043	-0.09812	0.5688	-0.91044	-0.69375	0.86831	-0.56579	0.31989	0.21641	0.19799	-0.15276	0
								Monolophosaurus	Non-megalosauran Megalosauroidea	IVPP 84019	Hendrickx et al., 2020	236	0.036282	0.6301	-0.62007	0.43912	-0.3579	-0.11736	-1.0884	-0.35732	-0.18946	0.050512	-0.060831	1.0728	-0.41328	0
								Monolophosaurus	Non-megalosauran Megalosauroidea	IVPP 84019	Hendrickx et al., 2020	237	-1.2315	1.3078	-1.0007	-0.86735	-0.32297	-0.60488	-1.6014	3.3914	0.74694	1.0924	0.078036	-0.66785	0.11315	0
								Monolophosaurus	Non-megalosauran Megalosauroidea	IVPP 84019	Hendrickx et al., 2020	238	-0.24744	0.50409	-0.22549	0.76227	0.52941	-0.43209	-0.5639	0.64964	0.032566	0.58092	0.25918	-0.68976	0.03184	0
								Monolophosaurus	Non-megalosauran Megalosauroidea	IVPP 84019	Hendrickx et al., 2020	239	-0.38301	-0.34176	0.30108	-0.050233	-0.64439	-1.0056	-0.32468	-0.70121	0.020739	0.39064	0.32226	-0.31055	-0.026548	0
								Monolophosaurus	Non-megalosauran Megalosauroidea	IVPP 84019	Hendrickx et al., 2020	240	-0.52978	0.64187	0.0054478	-0.30656	-0.52262	-0.68499	-0.49668	0.37585	-0.65142	0.011839	0.27435	0.49345	-0.35857	0
								Monolophosaurus	Non-megalosauran Megalosauroidea	IVPP 84019	Hendrickx et al., 2020	241	-0.2878	-0.26758	-0.038832	-0.78951	-1.1373	-0.60773	-1.2626	-1.5637	-0.72952	-0.29572	0.19527	0.67952	-0.37357	0
								Monolophosaurus	Non-megalosauran Megalosauroidea	IVPP 84019	Hendrickx et al., 2020	242	-0.80909	0.23972	0.38753	0.1284	0.1797	-0.89451	-0.38596	0.10365	-1.0869	-0.19588	0.23126	0.34852	-0.26044	0
								Piatnitzkysaurus	Non-megalosauran Megalosauroidea	PVL 4073	Hendrickx et al., 2020	243	-0.53147	-0.030916	0.66695	-0.16664	-0.45183	-0.019923	1.0542	-2.4788	-0.12264	-0.08974	0.50557	-0.31783	-0.18791	0
								Piatnitzkysaurus	Non-megalosauran Megalosauroidea	PVL 4073	Hendrickx et al., 2020	244	-1.1098	0.47787	0.60513	-0.051577	-0.04807	-0.42449	0.50618	-0.79293	-1.0264	-0.49566	0.35073	-0.30591	-0.16084	0
								Piatnitzkysaurus	Non-megalosauran Megalosauroidea	MACN-CH 895	Hendrickx et al., 2020	245	1.566	-0.32372	0.22196	-1.0382	0.53611	-0.084365	0.078499	-0.86097	0.8071	0.55654	0.092711	-0.43572	0.16566	0
								Piatnitzkysaurus	Non-megalosauran Megalosauroidea	MACN-CH 895	Hendrickx et al., 2020	246	0.39065	0.28559	0.036133	-1.0466	-0.31063	-0.19342	0.1221	-0.20241	0.8762	0.48748	0.016807	-0.078227	0.055085	0
								Marshosaurus	Non-megalosauran Megalosauroidea	UMNH VP 6368	Hendrickx et al., 2020	247	-1.0815	0.036262	0.32763	-0.35615	-1.157	-0.97666	0.46564	-0.23991	0.81597	0.38945	0.01095	-0.47699	0.22573	0
								Marshosaurus	Non-megalosauran Megalosauroidea	UMNH VP 6368	Hendrickx et al., 2020	248	-1.4278	0.7674	0.38442	0.55631	-0.089984	-1.0682	-0.28454	1.0108	-0.89831	-0.03001	0.34728	-0.9339	0.042895	0
								Marshosaurus	Non-megalosauran Megalosauroidea	DMNH 3718	Hendrickx et al., 2020	249	-0.043422	-0.0083236	-0.12645	-1.5916	-1.6226	0.058938	-0.36676	-2.2736	0.058556	-0.21922	0.19013	0.83963	-0.4184	0
								Marshosaurus	Non-megalosauran Megalosauroidea	DMNH 3718	Hendrickx et al., 2020	250	-0.072974	0.34042	0.2306	-3.1149	-0.49492	0.36516	0.70229	-1.1553	-0.96007	-0.65783	0.66476	-0.49983	-0.27994	0
								Marshosaurus	Non-megalosauran Megalosauroidea	DMNH 3718	Hendrickx et al., 2020	251	-0.40753	0.80998	-0.32549	-2.2675	-0.87872	-0.29935	-0.87631	0.7522	-1.0817	-0.097404	0.70663	-0.15361	-0.45099	0
								Marshosaurus	Non-megalosauran Megalosauroidea	DMNH 3718	Hendrickx et al., 2020	252	-0.82352	0.5225	-0.097298	-1.4009	-1.1712	-0.5721	-0.93213	0.3134	-0.24508	0.11889	0.53223	-1.9508	0.2338	0
								Marshosaurus	Non-megalosauran Megalosauroidea	DMNH 3718	Hendrickx et al., 2020	253	-1.0726	0.3363	-0.26352	-1.5578	-1.6192	-0.36935	-1.0131	-0.56662	-0.24936	0.33573	0.70324	-0.19493	-0.39668	0
								Marshosaurus	Non-megalosauran Megalosauroidea	DMNH 3718	Hendrickx et al., 2020	254	-2.166	-0.10054	-0.33661	1.0708	-2.4333	-1.5546	-1.9333	-0.12792	0.9788	1.7295	0.73235	-0.19948	-0.30505	0
								Afrovenator	Megalosauridae	UC UBA 1	Hendrickx et al., 2020	255	1.6216	1.0653	-0.15762	-2.1568	0.55927	0.74814	0.27047	-0.014016	-0.35095	-0.27892	0.177	0.54799	-0.36468	0
								Duriavenator	Megalosauridae	BMNH R332	Hendrickx et al., 2020	256	1.5017	0.39077	0.036064	-1.2893	0.33635	0.23787	-0.0024173	-0.52567	0.21385	0.15683	0.21787	-0.58256	0.032779	0
								Duriavenator	Megalosauridae	BMNH R332	Hendrickx et al., 2020	257	0.69519	0.65875	-0.22702	-2.3572	-0.24995	0.16885	-0.70316	0.27952	0.15215	-0.19529	-0.028703	-1.1454	0.29543	0
								Duriavenator	Megalosauridae	BMNH R332	Hendrickx et al., 2020	258	0.9829	1.2721	-0.22979	0.10877	0.17631	0.45452	-1.125	-0.8161	-1.1049	-0.65775	0.012772	0.78298	-0.482	0
								Duriavenator	Megalosauridae	BMNH R332	Hendrickx et al., 2020	259	0.65149	1.6177	-0.40427	0.10611	-0.55974	0.8179	-1.096	-1.4319	-0.6221	-0.78314	-0.19847	1.0114	-0.48619	0
								Duriavenator	Megalosauridae	BMNH R332	Hendrickx et al., 2020	260	1.3797	0.45093	-0.21689	-0.76638	-0.29662	-0.19155	0.63613	1.1316	-0.38638	-0.50551	-0.17476	0.32742	-0.064324	0
								Duriavenator	Megalosauridae	BMNH R332	Hendrickx et al., 2020	261	1.0531	0.4253	-0.28191	-0.13412	-0.38437	-0.14913	0.12874	0.90179	0.015793	-0.019078	-0.014762	-0.15212	-0.013949	0
								Duriavenator	Megalosauridae	BMNH R332	Hendrickx et al., 2020	262	0.52416	0.86175	-0.5083	-0.37268	-0.30688	0.057211	-0.34194	1.3814	-0.56214	-0.059596	0.14278	0.80913	-0.46405	0
								Megalosaurus	Megalosauridae	BMNH R39476	Hendrickx et al., 2020	263	0.95735	0.055768	0.24907	-0.65423	0.5824	-0.1485	-0.40767	-0.73597	-0.57972	0.024134	0.41535	-0.6178	-0.072501	0
								Megalosaurus	Megalosauridae	BMNH R47152	Hendrickx et al., 2020	264	-0.50735	-0.86329	0.51027	-0.43821	-0.2934	-1.2621	0.0088055	-0.6361	0.15501	0.39019	0.11478	0.25152	0.0073816	0
								Megalosaurus	Megalosauridae	BMNH R234	Hendrickx et al., 2020	265	1.6507	0.38023	0.12594	-1.0715	0.81096	0.1088	0.12262	-0.34079	-0.43682	-0.13061	0.13114	0.56436	-0.27235	0
								Megalosaurus	Megalosauridae	BMNH R31834	Hendrickx et al., 2020	266	0.30235	0.78744	-0.2441	-1.2926	-0.34569	-0.18197	-0.72513	0.45392	-0.57543	0.10101	0.4403	0.15555	-0.37715	0
								Megalosaurus	Megalosauridae	BMNH R47963	Hendrickx et al., 2020	267	1.7245	0.13988	0.11737	-0.99953	0.48551	0.31476	-0.20564	-1.6231	-0.76815	-0.43147	0.19133	0.7621	-0.41399	0
								Megalosaurus	Megalosauridae	BMNH R28608	Hendrickx et al., 2020	268	1.3616	1.1338	-0.03498	-0.15636	0.60803	0.70614	0.434	-0.71264	0.46364	0.045473	-0.24947	1.59	-0.42973	0
								Megalosaurus	Megalosauridae	BMNH R2635 big	Hendrickx et al., 2020	269	1.814	0.38134	-0.014157	-1.1766	0.56554	0.28719	-0.19165	-0.52339	0.05852	0.19027	0.24983	-0.27181	-0.089476	0
								Megalosaurus	Megalosauridae	BMNH R2635 small	Hendrickx et al., 2020	270	-0.62918	0.37938	0.49408	-0.33028	-0.13626	-0.75155	1.0747	0.39624	0.75903	0.036028	-0.42815	0.064702	0.30666	0
								Megalosaurus	Megalosauridae	OUMNH J13505	Hendrickx et al., 2020	271	1.4015	0.63744	-0.15652	-1.1091	0.075961	0.26011	-0.43614	-0.12733	0.80088	0.37698	0.041177	-1.1752	0.29609	0
								Megalosaurus	Megalosauridae	OUMNH J13506	Hendrickx et al., 2020	272	1.6388	-0.73798	0.06022	-1.0305	-0.17608	-1.129	1.0965	-0.059251	0.075913	-0.23626	-0.17272	-0.11116	0.27765	0
								Dubreuillosaurus	Megalosauridae	MNHN 1998-13	Hendrickx et al., 2020	273	-1.4227	1.0011	0.31843	1.1315	-0.93918	-0.46243	1.1529	-0.53767	0.92735	0.10161	-0.50576	1.9048	-0.29904	0
								Dubreuillosaurus	Megalosauridae	MNHN 1998-13	Hendrickx et al., 2020	274	-0.70748	0.67026	0.42104	0.65571	-0.15765	-0.68188	0.85993	0.20228	0.51084	0.23058	-0.19232	0.50432	-0.010455	0
								Dubreuillosaurus	Megalosauridae	MNHN 1998-13	Hendrickx et al., 2020	275	0.19599	0.96369	-0.26213	-1.1259	-0.98497	-0.14246	-0.73929	-0.091303	-0.99784	-0.14329	0.7483	-0.64621	-0.36934	0
								Dubreuillosaurus	Megalosauridae	MNHN 1998-13	Hendrickx et al., 2020	276	0.51286	0.53726	0.20817	-1.5223	-0.56728	0.51785	0.1595	-2.2464	-1.4586	-0.85802	0.80845	-0.81424	-0.37191	0
								Dubreuillosaurus	Megalosauridae	MNHN 1998-13	Hendrickx et al., 2020	277	-0.30899	1.1077	-0.2517	-0.86485	-0.6457	-0.4759	-0.9	1.2584	-0.44328	0.28296	0.56467	-1.2285	-0.039164	0
								Dubreuillosaurus	Megalosauridae	MNHN 1998-13	Hendrickx et al., 2020	278	-0.090799	0.85604	-0.10707	-1.6823	-0.59446	-0.307	-0.69085	0.72189	-0.189	-0.49575	-0.14761	-1.4975	0.4484	0
								Dubreuillosaurus	Megalosauridae	MNHN 1998-13	Hendrickx et al., 2020	279	-0.91074	1.2135	0.14873	-0.15733	-0.1263	-0.23169	-0.69643	0.58613	-0.47321	-0.2388	0.22597	-2.3008	0.43311	0
								Dubreuillosaurus	Megalosauridae	MNHN 1998-13	Hendrickx et al., 2020	280	-0.6742	0.75542	0.042446	0.59516	-1.0839	-0.62992	-0.55993	-0.85272	-0.88025	-0.77836	-0.272	1.4037	-0.40923	0
								Dubreuillosaurus	Megalosauridae	MNHN 1998-13	Hendrickx et al., 2020	281	-0.69774	0.97418	-0.070235	0.95235	-1.2819	-0.61645	-0.99933	-0.88794	-1.1153	-0.91944	-0.26701	1.1776	-0.40109	0
								Dubreuillosaurus	Megalosauridae	MNHN 1998-13	Hendrickx et al., 2020	282	-0.80859	1.0658	-0.39267	1.0973	-2.2473	-0.26627	-1.9995	-2.2606	-0.81875	-1.6191	-1.0116	1.8002	-0.2843	0
								Torvosaurus	Megalosauridae	BYUVP 725 12817	Hendrickx et al., 2020	283	2.9439	1.493	-0.22687	-1.8625	0.94574	1.3052	0.78843	-0.29888	-0.15864	-0.26895	0.19684	0.62449	-0.43816	0
								Torvosaurus	Megalosauridae	BMNH R36728	Hendrickx et al., 2020	284	2.9876	1.112	-0.04715	-1.6876	1.0349	1.3884	0.60194	-1.1921	-0.27788	-0.20797	0.50711	-0.5717	-0.24965	0
								Torvosaurus	Megalosauridae	ML 1100	Hendrickx et al., 2020	285	2.7489	1.1003	-0.48241	-3.3681	0.37734	1.1606	0.11677	0.090494	0.37196	-0.19011	0.003897	0.018985	-0.10107	0
								Torvosaurus	Megalosauridae	ML 1853	Hendrickx et al., 2020	286	1.8055	1.1957	-0.2369	-0.20398	0.68853	0.86905	-0.83292	-0.8087	-0.31574	0.070715	0.34894	-0.24224	-0.30632	0
								Torvosaurus	Megalosauridae	ML 962 (Mesial)	Hendrickx et al., 2020	287	2.0801	0.81994	-0.18055	-0.70108	-0.41028	-0.27313	1.9407	0.35623	0.24034	-0.5785	-0.26139	-0.30699	0.23909	0
								Torvosaurus	Megalosauridae	ML 857	Hendrickx et al., 2020	288	1.9335	1.1247	-0.84668	-0.35062	-1.3049	-0.19455	0.4763	0.48756	0.52425	0.11376	0.018449	0.36076	-0.19141	0
								Torvosaurus	Megalosauridae	SHN.067	Hendrickx et al., 2020	289	2.6302	1.9841	-0.54841	-1.5884	-1.487	0.78834	2.8097	1.1473	0.19585	-0.88915	-0.12586	0.63865	-0.27972	0
								Torvosaurus	Megalosauridae	SHN.215	Hendrickx et al., 2020	290	1.2091	1.3291	-0.36553	-0.94551	-0.98805	0.69727	1.6634	0.40557	0.1109	-0.48093	0.010136	0.69209	-0.35618	0
								Torvosaurus	Megalosauridae	SHN.221	Hendrickx et al., 2020	291	1.7357	1.6065	-0.38103	-0.67298	-1.1162	0.7391	1.982	0.60494	0.54683	-0.51542	-0.15802	-0.098654	-0.027715	0
								Torvosaurus	Megalosauridae	SHN.257	Hendrickx et al., 2020	292	1.2948	0.97276	-0.029018	-0.12123	-0.31522	0.4765	1.6332	0.20349	0.074779	-0.43921	-0.01433	-0.25788	-0.0201	0
								Torvosaurus	Megalosauridae	SHN.266	Hendrickx et al., 2020	293	1.3109	0.75673	-0.40176	-1.4756	-0.74134	-0.090398	0.773	1.5691	-0.050474	-0.70973	-0.47512	0.46035	0.051478	0
								Torvosaurus	Megalosauridae	SHN.268	Hendrickx et al., 2020	294	1.972	2.0458	-0.58264	-1.3875	-1.0794	0.7289	1.9723	1.571	-0.092608	-0.99261	-0.31177	0.73102	-0.23984	0
								Torvosaurus	Megalosauridae	SHN.294	Hendrickx et al., 2020	295	1.2294	1.1741	-0.26932	-0.23273	-0.57016	0.47747	1.162	0.57271	0.11873	-0.37686	-0.067316	-0.016536	-0.092346	0
								Torvosaurus	Megalosauridae	SHN.304	Hendrickx et al., 2020	296	1.3053	0.30853	-0.19007	-0.65785	-1.475	0.36963	1.6934	-0.79197	1.0913	0.19552	0.17829	-0.13539	-0.075393	0
								Torvosaurus	Megalosauridae	SHN.319	Hendrickx et al., 2020	297	2.2704	0.3675	-0.0038703	-0.84393	-0.56906	-0.037311	2.0085	0.32722	-0.10608	-0.58215	-0.021788	0.051711	-0.023428	0
								Torvosaurus	Megalosauridae	SHN.320	Hendrickx et al., 2020	298	2.4607	0.94139	-0.28408	-1.2013	-1.0512	0.16189	2.0625	0.83217	0.20163	-0.74481	-0.26397	0.11515	0.046045	0
								Torvosaurus	Megalosauridae	SHN.359a	Hendrickx et al., 2020	299	0.051523	0.78218	-0.17029	-1.1676	-0.72777	0.57157	1.2929	0.14971	0.25593	-0.25648	0.013356	0.62544	-0.2838	0
								Torvosaurus	Megalosauridae	SHN.362	Hendrickx et al., 2020	300	1.4956	1.8152	-0.55699	0.011877	-0.69423	0.69007	0.8546	1.0305	-0.12644	-0.44114	-0.031343	0.32545	-0.30025	0
								Torvosaurus	Megalosauridae	SHN.364	Hendrickx et al., 2020	301	1.2476	0.32854	0.0044984	0.37727	-0.9178	0.44275	1.5064	-1.1408	0.95328	0.24236	0.23536	-0.70627	0.039618	0
								Torvosaurus	Megalosauridae	SHN.374	Hendrickx et al., 2020	302	2.4367	1.52	-0.89851	-2.1267	-1.7345	0.17615	1.292	2.0009	0.0016259	-0.8354	-0.38783	1.2699	-0.30282	0
								Torvosaurus	Megalosauridae	SHN.401	Hendrickx et al., 2020	303	2.5351	1.1757	-0.53235	-2.2694	-1.9147	0.33568	2.5978	0.97121	0.69646	-0.7226	-0.2999	0.56224	-0.05719	0
								Torvosaurus	Megalosauridae	SHN.440	Hendrickx et al., 2020	304	1.1337	0.63183	-0.33935	-1.296	-1.9019	0.36931	1.6587	-0.052073	1.946	-0.15389	-0.58294	-0.83501	0.56157	0
								Torvosaurus	Megalosauridae	SHN.441	Hendrickx et al., 2020	305	2.5974	0.88042	-0.27209	-1.2326	-1.286	0.20826	2.3506	0.54889	0.48617	-0.60538	-0.18374	-0.03725	0.066862	0
								Torvosaurus	Megalosauridae	SHN.442	Hendrickx et al., 2020	306	1.5497	0.36205	-0.19543	-1.0413	-1.7825	0.37218	2.207	-0.66283	1.5272	0.20296	0.090359	-0.4904	0.11167	0
								Torvosaurus	Megalosauridae	SHN.470	Hendrickx et al., 2020	307	2.6297	0.65993	-0.38954	-2.5363	-1.5499	-0.053218	2.4548	1.1316	0.17388	-0.8724	-0.29321	0.87559	-0.10859	0
								cf. Baryonychinae	Spinosauridae	XMDFEC V0010	Hendrickx et al., 2020	308	0.064406	-0.64168	0.7046	-1.3126	-0.006673	-0.81321	1.546	-0.63996	0.59555	0.21972	0.0039444	0.27784	0.10564	0
								Suchosaurus	Spinosauridae	BMNH R36536 (Owen, 1841)	Hendrickx et al., 2020	309	1.4057	-7.4577	4.3825	1.521	-0.016861	3.5275	-1.5427	2.6827	-0.77284	-2.4531	1.4126	1.1769	-1.5125	0
								Baryonyx	Spinosauridae	BMNH R9951	Hendrickx et al., 2020	310	0.096342	-3.3156	1.9217	0.099777	-2.3451	2.672	1.1286	-0.79624	0.1868	3.5919	-2.1258	-0.15956	1.101	0
								Baryonyx	Spinosauridae	BMNH R9951	Hendrickx et al., 2020	311	-0.18445	-5.204	2.518	-0.60193	-1.1064	0.61015	0.51842	0.84939	-1.5812	2.8835	-2.5649	0.8908	1.2415	0
								Baryonyx	Spinosauridae	BMNH R9951	Hendrickx et al., 2020	312	-0.82323	-4.6309	2.7016	0.16475	-1.288	1.0935	1.0333	0.048939	-1.7052	2.7615	-2.245	-0.10506	1.2781	0
								Baryonyx	Spinosauridae	BMNH R9951	Hendrickx et al., 2020	313	0.98892	-1.2683	0.12741	0.31243	-0.22967	-1.1208	-0.77351	-0.70131	2.5376	1.9194	-0.09834	-0.57099	0.48447	0
								Baryonyx	Spinosauridae	BMNH R9951	Hendrickx et al., 2020	314	1.0389	-0.36766	0.30294	0.79687	0.78042	-0.93211	-0.059938	-0.053666	0.80392	0.6683	-0.48321	1.7819	-0.13629	0
								Baryonyx	Spinosauridae	BMNH R9951	Hendrickx et al., 2020	315	0.51901	-5.7395	3.0413	0.064305	-1.3897	2.607	-0.031397	-0.3698	-3.7619	3.2231	-2.6273	-0.16839	1.2784	0
								Baryonyx	Spinosauridae	BMNH R9951	Hendrickx et al., 2020	316	0.75842	-3.6159	1.1053	0.030854	0.79282	-2.6568	-0.44313	-1.7721	0.38338	0.9465	-0.12525	1.1546	0.17223	0
								Baryonyx	Spinosauridae	BMNH R9951	Hendrickx et al., 2020	317	1.2138	-6.936	3.0943	-0.084956	-0.76955	1.5438	-0.79751	0.24359	-1.6405	1.7044	-1.2568	1.219	0.30473	0
								Baryonyx	Spinosauridae	BMNH R9951	Hendrickx et al., 2020	318	-0.2733	-5.4591	3.1254	0.46152	-1.2494	2.2276	0.4032	-0.22536	-3.3477	3.146	-2.5669	-0.1855	1.3039	0
								Baryonyx	Spinosauridae	BMNH R9951	Hendrickx et al., 2020	319	-0.062152	-2.3557	2.4745	0.88994	-1.112	3.9775	1.2337	1.4299	-2.8118	2.8446	-2.9346	0.3114	1.0774	0
								Baryonyx	Spinosauridae	BMNH R9951	Hendrickx et al., 2020	320	0.50712	-5.2962	2.8245	0.26376	-0.56052	1.798	-0.29269	0.64392	-3.2402	3.0556	-2.5346	-0.30104	1.3592	0
								Baryonyx	Spinosauridae	BMNH R9951	Hendrickx et al., 2020	321	-0.88243	0.2279	0.65218	1.4523	0.27809	-0.43306	0.30041	0.26783	0.49507	0.41992	-0.25702	0.78434	-0.087436	0
								Baryonyx	Spinosauridae	BMNH R9951	Hendrickx et al., 2020	322	-0.087558	-1.8981	1.1359	0.93002	2.0961	-2.5003	-0.4029	0.42798	-1.5064	-0.26712	-0.57974	2.6258	-0.21921	0
								Baryonyx	Spinosauridae	BMNH R9951	Hendrickx et al., 2020	323	-0.43229	-3.7383	1.2009	0.42132	-0.25868	-2.5825	-0.093856	-1.7786	1.0667	1.4092	-0.56932	1.813	0.22773	0
								Baryonyx	Spinosauridae	BMNH R9951	Hendrickx et al., 2020	324	1.2924	-6.246	2.9178	-0.45468	-0.98347	2.2031	-0.15147	-0.40081	-2.912	3.5459	-2.5528	-0.18527	1.378	0
								Baryonyx	Spinosauridae	BMNH R9951	Hendrickx et al., 2020	325	1.0868	-3.6269	1.9286	0.88799	-2.455	3.9952	-0.58351	-0.56614	-1.1663	4.2301	-2.4863	-0.97383	1.2882	0
								Baryonyx	Spinosauridae	BMNH R9951	Hendrickx et al., 2020	326	1.7616	-3.5064	0.90093	-0.31539	1.0617	-2.338	-0.56685	-1.7017	0.53543	1.0032	-0.19707	1.5162	0.089117	0
								Baryonyx	Spinosauridae	BMNH R9951	Hendrickx et al., 2020	327	0.41125	-2.636	0.69251	0.25075	0.99019	-2.4151	-1.3089	-0.11323	0.62845	1.4331	-0.0046147	0.34281	0.2677	0
								Baryonyx	Spinosauridae	BMNH R9951	Hendrickx et al., 2020	328	0.88917	-4.035	1.196	0.21322	0.9688	-2.1136	-0.071824	-2.1303	-0.34537	0.54638	0.35467	-0.89096	0.44297	0
								Baryonyx	Spinosauridae	BMNH R9951	Hendrickx et al., 2020	329	0.098713	-3.6413	1.0422	-0.097277	0.8029	-1.8134	-0.27902	-1.9108	-0.19194	0.58937	0.30731	-0.59793	0.33759	0
								Baryonyx	Spinosauridae	BMNH R9951a	Hendrickx et al., 2020	330	0.7239	-4.0255	1.3298	0.55743	1.2336	-2.0202	0.019109	-2.3632	-0.3868	0.55895	0.40402	-1.1158	0.47702	0
								Baryonyx	Spinosauridae	BMNH R9951d	Hendrickx et al., 2020	331	1.2596	-4.038	0.96969	-0.051313	0.65052	-2.3362	-0.43522	-1.628	-0.29397	0.57084	0.26017	-0.75501	0.45907	0
								Baryonyx	Spinosauridae	BMNH R9951e	Hendrickx et al., 2020	332	0.90288	-3.9364	1.0799	0.31818	0.86288	-2.0785	-0.35946	-2.1164	-0.38925	0.56167	0.34782	-0.69718	0.36353	0
								Baryonyx	Spinosauridae	BMNH R9951f	Hendrickx et al., 2020	333	0.6174	-3.8514	1.1078	0.12358	0.99273	-2.1854	-0.42343	-1.4702	-0.088732	0.52567	0.092609	-1.3226	0.71273	0
								Baryonyx	Spinosauridae	BMNH R9951h	Hendrickx et al., 2020	334	1.5614	-4.2578	1.1631	0.17203	0.97294	-2.614	-0.39382	-1.4003	-0.10927	0.33427	-0.11184	-1.6319	0.96831	0
								Baryonyx	Spinosauridae	BMNH R9951n	Hendrickx et al., 2020	335	1.4956	-4.0602	0.95959	0.35206	0.80342	-2.4847	-0.72903	-1.4193	-0.31688	0.63181	0.23401	-1.1133	0.58003	0
								Suchomimus	Spinosauridae	UC G69-5	Hendrickx et al., 2020	336	0.97408	-2.1301	1.2878	-0.45495	0.9087	-1.1903	0.78526	0.76042	3.6484	-2.0247	1.3382	1.0671	-0.73793	0
								Suchomimus	Spinosauridae	UC G67-1	Hendrickx et al., 2020	337	1.5617	-7.6423	3.884	0.1249	-1.6916	3.2636	-0.86252	0.30233	0.64535	-0.4938	0.62227	-1.5479	-0.075896	0
								Suchomimus	Spinosauridae	UC G67-8	Hendrickx et al., 2020	338	-0.23055	-4.1455	3.2522	0.55119	-2.0522	3.7874	0.49518	1.5888	0.74469	-2.0928	1.4494	0.076248	-1.242	0
								Suchomimus	Spinosauridae	UC G35-9	Hendrickx et al., 2020	339	0.45827	-5.3582	3.1675	0.75417	-2.5807	3.2205	-0.041654	-0.28555	2.6624	-1.2412	1.8212	-1.6692	-0.73113	0
								Suchomimus	Spinosauridae	UC G35-9	Hendrickx et al., 2020	340	1.0809	-7.3391	3.6667	0.99235	-1.414	2.44	-1.5114	0.63908	0.40008	-1.1367	1.3735	-0.082716	-0.92295	0
								Suchomimus	Spinosauridae	UC G43-4	Hendrickx et al., 2020	341	1.2283	-4.4443	2.9187	0.88483	-1.041	3.5044	-1.6496	2.7677	1.5411	-2.2053	0.25901	-0.99711	-0.24892	0
								Suchomimus	Spinosauridae	UC G26-5	Hendrickx et al., 2020	342	0.81534	-6.3471	2.9226	-0.18456	-0.95431	0.24632	-1.2521	0.67775	3.8197	-3.245	2.1537	-0.55876	-0.87511	0
								Suchomimus	Spinosauridae	UC G73-3	Hendrickx et al., 2020	343	0.62995	-4.9714	2.145	0.089734	0.31485	-2.1801	-0.66555	-0.30626	4.8922	-4.29	4.2672	0.4011	-2.0406	0
								Suchomimus	Spinosauridae	UC G73-3	Hendrickx et al., 2020	344	-0.86689	-4.3212	3.5713	0.7915	-1.7151	3.9204	0.73632	2.3246	1.3015	-1.9147	0.64149	-0.069658	-0.72173	0
								Suchomimus	Spinosauridae	UC G34-12	Hendrickx et al., 2020	345	0.17177	-2.7372	1.1825	-1.2484	0.2487	-2.2957	1.3107	-0.84697	1.0407	0.65374	-0.28562	0.3675	0.50949	0
								Suchomimus	Spinosauridae	UC G100-4	Hendrickx et al., 2020	346	0.62021	-4.8691	2.5441	-1.4283	-1.0083	1.4652	0.56309	-0.37929	-2.987	2.1568	-1.793	-0.64691	1.1227	0
								Suchomimus	Spinosauridae	UC G22-7	Hendrickx et al., 2020	347	0.53712	-6.4439	3.993	-0.3158	0.35509	1.5442	0.42321	2.166	-1.1002	-2.4806	1.0982	0.93773	-0.97589	0
								Suchomimus	Spinosauridae	UC G34-12	Hendrickx et al., 2020	348	1.4593	-6.1931	3.4092	0.41438	0.013708	1.796	-1.0159	1.753	-1.214	-2.2887	1.1002	2.0261	-1.4134	0
								Suchomimus	Spinosauridae	UC G34-7	Hendrickx et al., 2020	349	-0.30589	-7.5367	4.1233	2.5147	-1.7714	2.2991	-1.4667	1.577	1.5481	-1.8119	1.8122	0.36149	-1.3079	0
								Suchomimus	Spinosauridae	UC G34-7	Hendrickx et al., 2020	350	-1.1874	-4.9065	4.1087	1.9362	-2.2566	4.5553	1.3054	1.3775	1.0144	-2.2256	1.7904	1.0669	-1.7853	0
								Suchomimus	Spinosauridae	UC G54-4	Hendrickx et al., 2020	351	1.8394	-6.7329	3.3124	0.46541	-0.64709	2.2947	-1.0979	0.18741	0.77872	-1.0941	1.4129	0.25723	-0.97373	0
								Suchomimus	Spinosauridae	UC G89-5	Hendrickx et al., 2020	352	1.598	-2.8077	1.2231	-1.651	1.4906	-2.0427	1.0207	0.23681	-1.01	-1.7931	-1.3547	-0.71331	1.2549	0
								Suchomimus	Spinosauridae	UC G54-4	Hendrickx et al., 2020	353	2.0435	-2.7331	1.1138	-0.55618	1.7134	-2.1056	0.54293	0.23502	-1.4286	-1.1533	-0.66143	-0.76574	0.85556	0
								Suchomimus	Spinosauridae	UC G48-9	Hendrickx et al., 2020	354	1.6058	-3.1174	1.153	-1.6541	1.7952	-2.4029	0.36412	0.68525	-1.7206	-1.5953	-1.0366	-0.1257	0.91238	0
								Suchomimus	Spinosauridae	UC G67-1	Hendrickx et al., 2020	355	1.6875	-2.8217	1.1746	-0.87508	1.7307	-1.8886	1.0854	-0.22884	-1.919	-0.72855	0.12575	0.16657	0.14815	0
								Irritator	Spinosauridae	SMNS 58022	Hendrickx et al., 2020	356	-1.0969	-2.4653	2.0168	2.3898	-0.095855	-0.75853	0.31498	0.45883	5.0122	-4.2566	3.7779	2.0846	-2.56	0
								Sinopliosaurus	Spinosauridae	IVPP V4793.1	Hendrickx et al., 2020	357	0.58085	-6.235	4.2099	-0.76037	-2.0245	5.059	0.25537	2.7849	2.2122	-3.3476	0.43969	-0.27365	-0.59547	0
								Spinosaurinae indet.	Spinosauridae	SMA 0173	Hendrickx et al., 2020	358	2.6514	-6.3046	3.8991	-0.036765	-0.44953	5.1732	-0.26256	1.6737	0.65493	-1.3002	0.77446	-0.52325	-0.68701	0
								Spinosaurinae indet.	Spinosauridae	MSNM V6422	Hendrickx et al., 2020	359	2.7015	-5.9694	3.2858	2.8398	-1.4836	3.6675	-1.4395	1.2442	1.0226	-3.6786	3.1349	-1.4904	-1.7744	0
								Spinosaurinae indet.	Spinosauridae	MSNM V3976	Hendrickx et al., 2020	360	1.4706	-6.5662	4.2294	1.5225	-1.025	4.995	-0.96575	2.7153	2.1801	-2.7059	1.6878	-0.19605	-1.3356	0
								Spinosaurinae indet.	Spinosauridae	GZG.V.19990	Hendrickx et al., 2020	361	0.48005	-0.49291	0.54943	1.0205	0.76997	-0.1049	0.68411	-0.95503	-0.30227	-0.038501	0.21166	-0.76363	0.1072	0
								Spinosaurinae indet.	Spinosauridae	GZG.V.20001	Hendrickx et al., 2020	362	0.55381	-0.48363	0.42361	0.63016	0.46689	-0.10466	0.67645	-0.91872	-0.29626	-0.07523	0.19666	-0.34869	-0.010634	0
								Spinosaurinae indet.	Spinosauridae	GZG.V.20011	Hendrickx et al., 2020	363	0.22264	-0.67152	0.66735	-0.27668	0.48412	-0.078331	1.692	-0.90517	-0.097361	-0.11512	0.25246	-0.45783	0.062807	0
								Spinosaurinae indet.	Spinosauridae	GZG.V.20030	Hendrickx et al., 2020	364	0.15008	0.034401	0.12324	1.429	0.54867	0.028832	-0.46449	-0.4051	-0.32701	0.20681	0.23416	-0.46797	-0.083633	0
								Spinosaurinae indet.	Spinosauridae	GZG.V.20034	Hendrickx et al., 2020	365	0.87337	-0.84498	0.51593	-0.49834	0.17513	-0.34543	1.5283	-0.7118	-0.14539	-0.15446	0.19938	-0.22995	0.041993	0
								Chienkosaurus	Metriacanthosauridae	IVPP V237.1	Hendrickx et al., 2020	366	0.61492	0.14265	0.44402	-0.081948	0.86687	-0.33531	0.71267	-0.072874	0.70306	0.41278	-0.21936	0.53059	0.049607	0
								Sinraptor	Metriacanthosauridae	IVPP V10600	Hendrickx et al., 2020	367	1.5197	0.63822	0.14232	-1.5523	0.3847	0.90289	0.53507	-1.5857	-0.20607	-0.11885	0.56285	-0.64686	-0.20789	0
								Sinraptor	Metriacanthosauridae	IVPP V10600	Hendrickx et al., 2020	368	1.4111	0.96242	-0.083348	-2.5867	0.017259	1.0719	0.44468	-1.1398	-0.48923	-0.39333	0.5978	-0.55217	-0.30018	0
								Sinraptor	Metriacanthosauridae	IVPP V10600	Hendrickx et al., 2020	369	1.4647	0.97014	-0.12038	-2.3669	-0.12255	1.116	0.11521	-1.4103	-0.55815	-0.36951	0.73572	-1.2067	-0.20816	0
								Sinraptor	Metriacanthosauridae	IVPP V10600	Hendrickx et al., 2020	370	1.5645	0.77721	-0.25813	-2.2146	-0.57163	1.1557	-0.51107	-2.4342	-1.1291	-0.7784	0.68432	-0.28392	-0.52243	0
								Sinraptor	Metriacanthosauridae	IVPP V10600	Hendrickx et al., 2020	371	0.58209	0.9352	-0.31263	0.57107	-0.72111	0.46331	-2.3268	-2.5902	-1.4798	-1.4663	-0.39886	0.66655	-0.31977	0
								Sinraptor	Metriacanthosauridae	IVPP V10600	Hendrickx et al., 2020	372	0.93386	1.0789	-0.35855	-1.2614	-0.31151	0.63591	-0.78397	-0.81116	-0.54344	-0.23364	0.32819	0.43449	-0.49374	0
								Sinraptor	Metriacanthosauridae	IVPP V10600, black no plaster	Hendrickx et al., 2020	373	0.81011	0.83322	-0.026778	-0.8853	-0.030344	0.64205	0.14688	-1.2271	0.11623	-0.017402	0.18981	0.481	-0.34953	0
								Sinraptor	Metriacanthosauridae	IVPP V10600, black plaster	Hendrickx et al., 2020	374	0.95609	0.67471	-0.060336	-0.82404	-0.031847	0.56421	-0.36976	-1.3959	-0.22117	-0.062046	0.34581	-0.011175	-0.30931	0
								Sinraptor	Metriacanthosauridae	IVPP V10600, light brown no pit	Hendrickx et al., 2020	375	0.52588	0.65077	0.26036	0.027956	0.52334	0.44689	0.13769	-1.2141	0.21954	0.23011	0.26127	-0.41314	-0.08717	0
								Sinraptor	Metriacanthosauridae	IVPP V10600, light brown deep pit	Hendrickx et al., 2020	376	0.82168	0.42422	0.23627	-0.093664	0.50652	0.28133	0.36209	-1.1557	0.46107	0.26227	0.0071741	0.66895	-0.22177	0
								Sinraptor	Metriacanthosauridae	IVPP V10600, brown plaster	Hendrickx et al., 2020	377	1.0837	0.76954	0.025012	-0.63296	0.27104	0.61066	-0.2144	-1.2705	-0.30071	-0.069618	0.3893	-0.30421	-0.24853	0
								Erectopus	Metriacanthosauridae	MNHN 2001-4	Hendrickx et al., 2020	378	0.053296	-0.12943	0.46623	-2.5114	-0.39447	-0.2482	1.1548	-0.69178	0.31041	-0.41058	-0.060255	-0.81216	0.35911	0
								Erectopus	Metriacanthosauridae	MNHN 2001-4	Hendrickx et al., 2020	379	0.26946	0.23958	0.16004	-3.0064	-0.71167	-0.068738	0.62639	-0.3142	0.40329	-0.71852	-0.38224	-0.93055	0.51345	0
								Erectopus	Metriacanthosauridae	MNHN 2001-4	Hendrickx et al., 2020	380	0.99378	0.35767	0.15463	-1.8114	-0.16139	0.049825	0.22687	-0.55337	-0.0045629	-0.35051	0.1043	-1.3631	0.32652	0
								Allosaurus	Allosauridae	YPM 4944 (or 1333?)	Hendrickx et al., 2020	381	-0.45275	1.1192	-0.24859	-0.48501	-0.84698	1.2425	0.84985	-1.3119	-0.030673	-0.6524	-0.13958	1.7163	-0.65602	0
								Allosaurus	Allosauridae	YPM 4944 (or 1333?)	Hendrickx et al., 2020	382	0.10189	1.0359	0.064324	1.8151	0.78151	0.34727	-0.14302	0.69158	0.10542	0.18913	0.051479	-1.6997	0.32984	0
								Allosaurus	Allosauridae	YPM 4944 (or 1333?)	Hendrickx et al., 2020	383	0.031091	0.68537	0.098312	0.42801	0.34966	0.34058	0.54428	0.3342	-0.038937	-0.15969	-0.019552	-0.58519	0.081689	0
								Allosaurus	Allosauridae	SDSM 25248	Hendrickx et al., 2020	384	0.89049	0.77412	-0.073067	-0.56416	-0.43426	0.32942	1.3437	0.43523	0.25298	-0.40971	-0.16622	-0.20555	0.07597	0
								Allosaurus	Allosauridae	SDSM 25248	Hendrickx et al., 2020	385	0.12632	-0.21663	-0.14889	-1.0601	-0.92001	-0.20431	0.36112	0.26579	0.99959	0.14139	-0.28553	-0.39152	0.30736	0
								Allosaurus	Allosauridae	UMNH VP 6499	Hendrickx et al., 2020	386	0.91828	0.55025	0.33843	0.81458	1.1954	-0.25516	0.94414	0.48424	1.4412	0.77299	-0.60455	1.5962	-0.043783	0
								Allosaurus	Allosauridae	UMNH VP 6499	Hendrickx et al., 2020	387	0.91925	0.90425	0.32739	0.56434	1.4223	0.032497	0.54183	0.46803	0.45165	0.28573	-0.30288	0.61265	-0.020256	0
								Allosaurus	Allosauridae	UMNH VP 6499	Hendrickx et al., 2020	388	1.1918	0.49158	0.55356	0.63978	1.5101	0.48965	1.0754	-1.4019	0.277	0.13368	-0.11538	1.3655	-0.35524	0
								Allosaurus	Allosauridae	UMNH VP 20687	Hendrickx et al., 2020	389	0.93628	0.1324	0.47954	0.49157	1.2411	-0.09219	0.87623	-0.47592	1.1357	0.70343	-0.29724	1.0802	-0.059325	0
								Allosaurus	Allosauridae	UMNH VP 10393 (juvenile)	Hendrickx et al., 2020	390	-0.70213	0.77439	0.60828	0.22621	0.45085	-0.29544	1.7529	0.34428	1.2314	0.32806	-0.47463	0.6419	0.15878	0
								Allosaurus	Allosauridae	UMNH VP 9369	Hendrickx et al., 2020	391	-0.32512	0.018841	0.58932	0.082145	0.12112	-0.53062	0.55697	-0.66589	0.53944	0.25163	0.025266	-1.0186	0.35792	0
								Allosaurus	Allosauridae	UMNH VP 6475 (juvenile)	Hendrickx et al., 2020	392	-1.9803	0.77075	0.91697	2.6182	0.39055	-0.73609	1.4089	-0.43475	0.66214	0.23782	-0.45268	1.0652	-0.032007	0
								Allosaurus	Allosauridae	UMNH VP 6475 (juvenile)	Hendrickx et al., 2020	393	-1.4934	0.37627	0.77649	0.63472	-0.25845	-0.55848	1.5643	-0.82596	0.53882	0.18715	0.010491	0.22238	-0.0087675	0
								Allosaurus	Allosauridae	UMNH VP 9351	Hendrickx et al., 2020	394	0.2019	1.0331	0.22427	1.8127	0.58749	-0.22119	0.12398	0.12953	0.83732	0.64754	-0.22099	0.40141	-0.026131	0
								Allosaurus	Allosauridae	UMNH VP 9351	Hendrickx et al., 2020	395	0.42448	0.7924	0.38289	0.57571	0.77496	-0.27568	0.1763	0.5172	1.3213	-0.11618	-1.0492	-1.2302	0.96695	0
								Allosaurus	Allosauridae	UMNH VP 9351	Hendrickx et al., 2020	396	0.48713	0.63673	0.31967	0.46612	0.9863	-0.15224	0.14511	0.14193	0.28813	0.33362	-0.081216	0.071201	0.01908	0
								Allosaurus	Allosauridae	UMNH VP 9211	Hendrickx et al., 2020	397	-0.025312	0.69291	0.20351	-1.445	-0.11533	0.020289	0.13681	-0.18897	-0.28189	-0.39204	0.14538	-1.2042	0.21867	0
								Allosaurus	Allosauridae	UMNH VP 9211	Hendrickx et al., 2020	398	-0.10762	0.52358	0.026341	-1.6198	-0.10012	-0.068888	-0.10522	0.14424	0.069329	0.092139	0.13841	-0.034718	-0.084337	0
								Allosaurus	Allosauridae	UMNH VP 9229	Hendrickx et al., 2020	399	1.4949	0.38612	0.028124	-0.74069	0.32616	0.39588	-0.14801	-1.3531	-0.15057	-0.071339	0.1471	0.613	-0.3365	0
								Allosaurus	Allosauridae	UMNH VP 9168	Hendrickx et al., 2020	400	1.4529	-0.1821	0.44311	-0.60544	1.0274	0.092774	0.16276	-1.2218	0.077311	0.23606	0.30588	-0.90466	0.13286	0
								Allosaurus	Allosauridae	UMNH VP 9218	Hendrickx et al., 2020	401	1.0589	0.5387	0.27616	-0.17874	0.98247	0.091289	0.57046	-0.1354	0.5418	0.32608	-0.13559	0.56171	-0.073347	0
								Allosaurus	Allosauridae	UMNH VP 5837	Hendrickx et al., 2020	402	0.77579	0.55486	0.44386	1.6413	1.3154	-0.33107	1.0327	0.38	1.8126	0.99898	-0.6911	1.4633	0.061806	0
								Allosaurus	Allosauridae	UMNH VP 7438	Hendrickx et al., 2020	403	1.2145	0.70418	0.39975	0.61475	1.3684	0.24287	0.54916	-0.47809	0.24211	0.21865	-0.054748	0.24991	-0.069129	0
								Allosaurus	Allosauridae	UMNH VP 6145	Hendrickx et al., 2020	404	-0.17938	0.6161	0.59921	1.5219	1.2365	-0.64056	1.2676	0.95999	1.6724	0.80017	-0.82586	1.3507	0.18999	0
								Allosaurus	Allosauridae	UMNH VP 6239	Hendrickx et al., 2020	405	1.0639	0.86403	0.25565	0.5269	1.3685	0.10672	0.30518	0.29917	0.45159	0.35536	-0.22125	0.49652	-0.042044	0
								Allosaurus	Allosauridae	UMNH VP 5812	Hendrickx et al., 2020	406	-0.3894	0.66014	0.64395	0.81316	0.76959	-0.46481	0.93529	0.22674	0.43323	0.10701	-0.28027	-0.25797	0.26708	0
								Allosaurus	Allosauridae	UMNH VP 6189	Hendrickx et al., 2020	407	1.4206	0.4653	-0.22648	-0.96016	-0.28467	0.60389	-0.59764	-1.7239	0.21142	0.08679	0.1894	0.46187	-0.34579	0
								Allosaurus	Allosauridae	UMNH VP 5841	Hendrickx et al., 2020	408	0.28563	0.41698	-0.13551	-0.91571	-0.41151	-0.02913	-0.66164	-0.21568	0.94259	0.75737	0.26978	-1.1398	0.18782	0
								Allosaurus	Allosauridae	UMNH VP 5785	Hendrickx et al., 2020	409	0.36943	0.15687	0.34076	-0.63552	0.29484	-0.19783	0.60872	-0.37817	0.83619	0.3971	-0.083758	-0.065908	0.13679	0
								Allosaurus	Allosauridae	UMNH VP 6101	Hendrickx et al., 2020	410	1.3541	0.063607	0.29049	-0.35877	0.84937	-0.088421	-0.27308	-0.61091	0.043713	0.24728	0.23359	-1.1562	0.22213	0
								Allosaurus	Allosauridae	UMNH VP 6113	Hendrickx et al., 2020	411	1.6193	-0.30743	0.38856	-0.75647	1.2098	-0.028172	-0.18882	-0.94565	-0.10472	0.22152	0.2759	-0.80059	0.12306	0
								Allosaurus	Allosauridae	UMNH VP 6177	Hendrickx et al., 2020	412	0.34588	0.45735	0.14996	-0.9876	-0.13325	0.15723	-0.16442	-0.9619	-0.25435	0.019822	0.52451	-1.1832	-0.0031941	0
								Allosaurus	Allosauridae	UMNH VP 7436	Hendrickx et al., 2020	413	1.4402	0.057198	0.33451	-0.4919	0.82694	0.23408	-0.019911	-1.4447	-0.33643	0.037401	0.4043	-0.5618	-0.087155	0
								Allosaurus	Allosauridae	UMNH VP 6105	Hendrickx et al., 2020	414	1.7039	0.46172	0.26376	-0.44687	1.1816	0.33007	0.050685	-0.54996	0.096625	0.12399	0.14696	-0.98889	0.18429	0
								Allosaurus	Allosauridae	UMNH VP 9211	Hendrickx et al., 2020	415	-0.24242	0.95569	-0.43608	-1.1676	-0.97519	0.28322	0.15809	1.2462	1.1267	-0.3667	-0.82518	-0.45624	0.50263	0
								Allosaurus	Allosauridae	UMNH VP 9211	Hendrickx et al., 2020	416	-0.19455	0.64663	-0.24294	-1.4095	-0.75146	0.30427	0.79578	0.75112	0.50547	-0.22332	-0.24761	0.28164	-0.0087797	0
								Allosaurus	Allosauridae	UMNH VP 9275	Hendrickx et al., 2020	417	-0.19832	-0.66907	0.28474	-0.71479	0.40337	-0.60222	0.0016089	0.64412	0.024193	-0.3534	-0.50331	-0.54823	0.49584	0
								Allosaurus	Allosauridae	UMNH VP 9273	Hendrickx et al., 2020	418	-0.023854	-0.13945	-0.013758	-0.64004	-0.23983	-0.14576	0.26215	0.28907	0.15831	0.053401	-0.0078151	0.027726	-0.01096	0
								Allosaurus	Allosauridae	UMNH VP 9273	Hendrickx et al., 2020	419	0.075088	-0.0067869	-0.20964	-0.5585	-0.16569	-0.28326	-0.32412	0.87514	-0.23901	0.14583	0.11724	0.38012	-0.21594	0
								Allosaurus	Allosauridae	UMNH VP 9218	Hendrickx et al., 2020	420	0.93771	0.23513	0.21552	0.42223	0.4808	-0.049054	0.73968	0.27556	-0.38593	-0.35601	-0.032484	-0.54415	0.12369	0
								Allosaurus	Allosauridae	UMNH VP 9369	Hendrickx et al., 2020	421	-0.25829	-0.50538	0.25514	0.052795	-0.17472	-0.11521	0.4247	-0.57766	0.88162	0.35692	-0.035099	-1.0618	0.38019	0
								Allosaurus	Allosauridae	UMNH VP 9365	Hendrickx et al., 2020	422	-0.24221	0.59249	0.45682	0.92491	0.92823	0.42487	0.89666	-0.029724	0.027041	-0.3136	-0.14991	-1.3272	0.39084	0
								Allosaurus	Allosauridae	UMNH VP 1251	Hendrickx et al., 2020	423	0.91146	0.074655	0.46762	0.79208	0.59651	0.21595	1.3724	-0.81933	-0.42101	-0.29369	0.23917	-0.48733	-0.037729	0
								Allosaurus	Allosauridae	USNM 8335	Hendrickx et al., 2020	424	0.888	0.65059	0.1407	-0.22104	0.55203	-0.29225	-1.0558	0.51566	1.3348	-1.0299	-1.9372	-1.8987	1.6054	0
								Allosaurus	Allosauridae	USNM 8335	Hendrickx et al., 2020	425	0.4396	0.69476	-0.31014	-1.5085	-0.57028	0.087142	-0.70692	-0.23393	-0.28261	0.084534	0.34907	0.51251	-0.43988	0
								Allosaurus	Allosauridae	CM 11844	Hendrickx et al., 2020	426	1.4232	-0.038255	0.51231	1.0561	1.6008	-0.47403	0.42106	-0.24166	0.45643	0.42837	-0.39591	1.3868	-0.10993	0
								Allosaurus	Allosauridae	CM 11844	Hendrickx et al., 2020	427	1.1815	-0.64259	0.79552	-1.0812	1.4391	-0.3885	0.74799	-0.60504	0.54982	-0.15323	-0.45772	-1.044	0.71418	0
								Allosaurus	Allosauridae	CM 21703	Hendrickx et al., 2020	428	0.33199	0.44429	0.8301	1.0333	1.6148	-0.1251	1.5991	-0.16005	1.1015	0.5171	-0.35439	0.18351	0.24393	0
								Allosaurus	Allosauridae	CM 21703	Hendrickx et al., 2020	429	0.6092	-0.39235	0.4212	0.1957	0.81873	-1.1712	0.45462	0.83149	1.2364	0.76404	-0.63366	1.2801	0.1715	0
								Allosaurus	Allosauridae	CM 21703	Hendrickx et al., 2020	430	0.68991	0.47239	0.41516	0.63501	0.84041	-0.19036	0.72978	-0.3267	0.51714	0.31537	-0.20641	0.85472	-0.11073	0
								Allosaurus	Allosauridae	CM 21703	Hendrickx et al., 2020	431	0.51911	0.46786	0.39929	1.0632	0.55195	0.49664	1.2725	-0.78992	-0.13846	-0.19239	0.20611	-0.76296	0.022176	0
								Allosaurus	Allosauridae	CM 21703	Hendrickx et al., 2020	432	0.027155	0.59741	0.43946	0.19384	0.52235	0.51204	1.6363	-0.17117	0.13955	-0.40482	-0.089907	-0.94885	0.269	0
								Allosaurus	Allosauridae	CM 21703	Hendrickx et al., 2020	433	0.25575	0.32077	0.33535	0.32865	0.40657	0.28463	1.1503	-0.22567	0.010584	-0.23355	0.019554	-0.70814	0.14696	0
								Allosaurus	Allosauridae	AMNH851	Hendrickx et al., 2020	434	1.2214	0.49891	0.19163	1.3602	1.1593	-0.38819	0.3749	0.52795	1.5558	0.96616	-0.66704	1.7652	-0.0682	0
								Allosaurus	Allosauridae	AMNH851	Hendrickx et al., 2020	435	1.0868	0.98464	-0.13347	-1.6472	0.35646	0.60408	-0.24488	-0.19089	-0.34546	-0.10104	0.3504	-0.35204	-0.20462	0
								Allosaurus	Allosauridae	LACM 46030	Hendrickx et al., 2020	436	1.0265	0.53205	0.26823	1.6377	0.70759	0.24097	0.61835	-0.27129	-0.30679	-0.15513	0.13931	-1.0768	0.13285	0
								Allosaurus	Allosauridae	LACM 46030	Hendrickx et al., 2020	437	0.99258	0.51418	0.26424	1.5148	0.70733	0.25908	0.63185	-0.32744	-0.44407	-0.22565	0.15034	-0.81153	0.042324	0
								Allosaurus	Allosauridae	LACM 46030	Hendrickx et al., 2020	438	0.90266	0.41603	0.42166	1.3529	0.74324	0.32153	1.1318	-0.57646	-0.28643	-0.24592	0.16392	-1.0084	0.12235	0
								Allosaurus	Allosauridae	LACM 46030	Hendrickx et al., 2020	439	0.8552	0.46127	0.25223	0.93821	0.36383	0.34736	1.0326	-0.50802	-0.18807	-0.21511	0.15217	-0.59891	0.0012419	0
								Allosaurus	Allosauridae	LACM 46030	Hendrickx et al., 2020	440	0.95183	0.14803	0.1485	0.58235	0.075247	0.12506	0.76576	-0.49859	-0.14775	-0.13731	0.14092	-0.27963	-0.058255	0
								Megaraptor	Megaraptora	MUCPv 595	Hendrickx et al., 2020	441	-1.7253	1.0281	0.38004	-0.3013	-0.69655	-0.52618	0.037902	-0.054638	-1.589	-0.66096	0.65965	-1.2104	-0.14311	0
								Megaraptor	Megaraptora	MUCPv 595	Hendrickx et al., 2020	442	-2.4648	1.5547	0.12647	0.46973	-1.3522	-0.09455	0.31308	-0.60825	-0.2018	-0.50155	-0.18179	1.2647	-0.44206	0
								Megaraptor	Megaraptora	MUCPv 595	Hendrickx et al., 2020	443	-1.8334	1.238	0.13113	0.053312	-1.0313	-0.51632	0.11225	0.27824	-0.56044	-0.19406	0.25335	0.24588	-0.32204	0
								Megaraptor	Megaraptora	MUCPv 595	Hendrickx et al., 2020	444	-1.9124	1.0094	0.30828	0.15877	-0.64943	-0.60135	-0.077272	0.03542	-1.1849	-0.42972	0.38424	-0.055856	-0.31579	0
								Megaraptor	Megaraptora	MUCPv 595	Hendrickx et al., 2020	445	-2.1541	1.6813	-0.14269	0.40924	-1.0927	-0.74694	-0.31676	1.7902	-0.055918	0.59022	0.44815	-0.15194	-0.29645	0
								Megaraptor	Megaraptora	MUCPv 595	Hendrickx et al., 2020	446	-1.9546	1.2007	0.15321	0.037772	-0.60462	-0.72196	-0.46367	0.9412	-1.2086	-0.062154	0.66828	-0.74754	-0.26745	0
								Fukuiraptor	Megaraptora	NDC-P0001	Hendrickx et al., 2020	450	-0.11094	0.0039054	-0.35435	-2.2343	-1.0682	-0.20794	0.37765	1.0523	0.46096	-0.14748	-0.30119	0.77783	-0.055085	0
								Australovenator	Megaraptora	AODF 604-341	Hendrickx et al., 2020	451	-0.78795	-1.1604	-3.1839	1.9346	0.50209	1.1673	0.71498	-0.99684	-0.32682	-0.38869	0.10891	-0.4132	-0.12253	0
								Australovenator	Megaraptora	AODF 604-42	Hendrickx et al., 2020	452	-1.0832	-1.0271	-2.491	1.3033	0.73789	0.89012	1.032	-0.2931	0.073721	-0.369	-0.10971	-1.2335	0.31926	0
								Australovenator	Megaraptora	AODF 604-343a	Hendrickx et al., 2020	453	-1.2114	-0.37982	-3.0076	0.41479	-0.13073	0.68151	-0.13012	1.3788	0.21383	0.25052	0.13049	-0.49336	-0.071423	0
								Australovenator	Megaraptora	AODF 604-343b	Hendrickx et al., 2020	454	-0.64706	0.19132	-0.23151	-0.34132	-0.11308	0.19115	0.061292	0.34291	0.12205	0.14115	0.077817	0.084161	-0.13326	0
								Australovenator	Megaraptora	AODF 604-342	Hendrickx et al., 2020	455	-0.98732	-0.11095	-1.2796	-0.06972	-0.042015	0.47517	0.23644	0.48802	0.18744	0.037893	0.013106	-0.18308	-0.045753	0
								Australovenator	Megaraptora	AODF 604-344	Hendrickx et al., 2020	456	-0.5831	-0.12081	-0.48011	-0.28399	0.061441	0.14708	0.3588	0.41718	0.25922	-0.085632	-0.16199	-0.44173	0.18161	0
								Cf. Acrocanthosaurus	Carcharodontosauridae	SMU Acrocan.	Hendrickx et al., 2020	457	2.3802	-0.70079	0.57972	-2.0359	1.6098	0.046555	1.6006	-0.84842	0.22593	0.39539	0.27053	1.2415	-0.34605	0
								Cf. Acrocanthosaurus	Carcharodontosauridae	SMU 73417	Hendrickx et al., 2020	458	1.1864	-0.90335	0.27868	-2.2703	-0.40441	-0.26717	0.5772	-1.5825	0.7923	0.48073	0.35372	-0.35011	0.057257	0
								Acrocanthosaurus	Carcharodontosauridae	NCSM 14345	Hendrickx et al., 2020	459	1.362	-0.86486	0.22001	-0.21333	0.31365	-0.7467	0.5489	-0.42261	2.4633	1.4832	-0.51311	1.6156	0.065854	0
								Acrocanthosaurus	Carcharodontosauridae	NCSM 14345	Hendrickx et al., 2020	460	2.1408	-1.1483	0.074209	-0.98044	0.080097	-0.71343	-0.024036	-1.0208	1.4028	0.97556	-0.21392	1.5661	-0.14393	0
								Acrocanthosaurus	Carcharodontosauridae	NCSM 14345	Hendrickx et al., 2020	461	1.7713	-1.4558	0.58422	0.70407	1.0383	-1.0326	0.51865	-1.0122	2.0958	1.4804	-0.41868	1.2079	0.17698	0
								Acrocanthosaurus	Carcharodontosauridae	NCSM 14345	Hendrickx et al., 2020	462	1.7946	-0.95536	0.41158	-0.72886	0.44255	-0.26033	0.84866	-1.7448	1.3171	0.91402	0.068629	0.94712	-0.13267	0
								Acrocanthosaurus	Carcharodontosauridae	NCSM 14345	Hendrickx et al., 2020	463	1.9808	-0.58396	0.17812	-0.75986	0.48974	-0.74105	-0.68814	-0.12639	0.76882	0.29208	-0.33311	-1.3516	0.69879	0
								Acrocanthosaurus	Carcharodontosauridae	NCSM 14345	Hendrickx et al., 2020	464	3.0019	-1.0823	0.094658	-1.9453	0.82538	-0.20646	-0.20073	-1.084	0.64361	0.64893	0.14832	0.36528	-0.039499	0
								Acrocanthosaurus	Carcharodontosauridae	NCSM 14345	Hendrickx et al., 2020	465	3.1646	-0.95566	0.24559	-1.6914	1.354	-0.12367	0.092254	-1.0844	0.1162	0.3706	0.15095	0.77449	-0.18714	0
								Acrocanthosaurus	Carcharodontosauridae	NCSM 14345	Hendrickx et al., 2020	466	2.3326	-1.6088	0.53565	-1.1839	1.0356	-0.68524	0.58125	-1.4328	0.7748	0.78235	0.056176	1.1269	-0.11759	0
								Acrocanthosaurus	Carcharodontosauridae	NCSM 14345	Hendrickx et al., 2020	467	2.7207	-0.52462	0.070986	-0.74411	1.1145	-0.36531	-0.53026	-0.20059	0.68391	0.71475	-0.041185	-0.048664	0.1461	0
								Acrocanthosaurus	Carcharodontosauridae	NCSM 14345	Hendrickx et al., 2020	468	3.1915	-1.1322	0.37297	-1.8248	1.7944	-0.32462	-0.021864	-0.7944	-0.4562	0.12713	0.1601	0.73386	-0.17346	0
								Acrocanthosaurus	Carcharodontosauridae	NCSM 14345	Hendrickx et al., 2020	469	2.6035	-0.30925	0.001601	-1.2256	0.93117	0.0052332	-0.25459	-0.58018	0.5183	0.53551	0.033566	0.6015	-0.12962	0
								Acrocanthosaurus	Carcharodontosauridae	NCSM 14345	Hendrickx et al., 2020	470	3.2926	-1.0879	0.20019	-1.7309	1.4708	-0.16474	-0.35642	-1.0945	-0.071674	0.35579	0.18794	0.58511	-0.16068	0
								Acrocanthosaurus	Carcharodontosauridae	NCSM 14345	Hendrickx et al., 2020	471	3.1399	-0.82633	0.12125	-2.1911	1.2851	-0.18612	-0.49369	-0.54968	-0.26058	0.13152	0.19163	-0.18358	0.038222	0
								Acrocanthosaurus	Carcharodontosauridae	NCSM 14345	Hendrickx et al., 2020	472	2.6671	-0.6511	-0.12169	-2.5424	0.6047	-0.89279	-2.2842	0.74072	1.7633	-2.5463	-4.0074	-0.48083	2.4276	0
								Acrocanthosaurus	Carcharodontosauridae	NCSM 14345	Hendrickx et al., 2020	473	2.2641	-0.64613	0.22957	-1.7232	1.068	-0.46096	-0.44743	-0.20201	-0.29131	0.0065441	0.062301	-0.48526	0.19391	0
								Acrocanthosaurus	Carcharodontosauridae	NCSM 14345	Hendrickx et al., 2020	474	0.56487	-0.47905	0.5928	0.20258	1.1668	-1.0714	0.6017	0.64763	1.2931	0.64811	-0.7254	0.79073	0.37895	0
								Acrocanthosaurus	Carcharodontosauridae	NCSM 14345	Hendrickx et al., 2020	475	1.9781	-1.3229	0.68164	-1.121	1.6932	-1.0544	0.90305	0.34549	1.6045	0.57191	-0.95023	0.88845	0.58328	0
								Acrocanthosaurus	Carcharodontosauridae	NCSM 14345	Hendrickx et al., 2020	476	2.4996	-1.396	0.41738	-2.055	1.437	-0.75815	0.47195	-0.1191	0.75594	0.56824	-0.2945	1.2212	0.060859	0
								Acrocanthosaurus	Carcharodontosauridae	NCSM 14345	Hendrickx et al., 2020	477	2.4357	-1.0444	0.36394	-1.7743	1.4161	-0.41867	-0.078962	-0.56486	0.10679	0.30311	0.029056	0.14652	0.092783	0
								Acrocanthosaurus	Carcharodontosauridae	NCSM 14345	Hendrickx et al., 2020	478	2.3996	-0.77146	0.12881	-1.5811	1.0216	-0.49909	-0.57939	-0.25572	-0.083752	0.32782	0.1167	0.17261	-0.012887	0
								Acrocanthosaurus	Carcharodontosauridae	NCSM 14345	Hendrickx et al., 2020	479	2.6529	-0.70214	-0.037588	-0.53961	0.68526	-0.4251	-1.2473	-1.1546	-0.32657	0.17857	0.029588	0.92392	-0.26916	0
								Acrocanthosaurus	Carcharodontosauridae	NCSM 14345	Hendrickx et al., 2020	480	2.065	-0.3655	-0.074166	-1.2461	0.94388	-0.40542	-1.2152	0.15151	-0.25478	0.52679	0.33299	-0.14603	-0.10111	0
								Acrocanthosaurus	Carcharodontosauridae	NCSM 14345	Hendrickx et al., 2020	481	1.9174	-0.53876	0.087054	-0.61493	0.86345	-0.5084	-1.524	-0.40641	-0.50638	0.58766	0.70141	-1.744	0.15457	0
								Acrocanthosaurus	Carcharodontosauridae	NCSM 14345	Hendrickx et al., 2020	482	1.1706	-0.08023	-0.068955	-0.27081	0.90118	-0.75733	-1.4618	1.0796	0.21728	1.0261	0.31443	-0.74866	0.10746	0
								Acrocanthosaurus	Carcharodontosauridae	NCSM 14345	Hendrickx et al., 2020	483	1.6941	-0.97268	0.53298	-0.9793	1.1615	-1.1821	0.49466	0.64762	1.4865	0.178	-1.2156	0.48465	0.79183	0
								Acrocanthosaurus	Carcharodontosauridae	NCSM 14345	Hendrickx et al., 2020	484	2.4584	-1.0762	0.2833	-1.4081	1.2976	-1.0216	0.28329	0.60244	0.91023	0.61421	-0.55288	1.6117	0.074884	0
								Acrocanthosaurus	Carcharodontosauridae	NCSM 14345	Hendrickx et al., 2020	485	2.5686	-0.55918	-0.055611	-1.1059	0.37808	-0.11123	-0.47948	-1.4497	0.18802	0.13435	-0.15258	1.6952	-0.38152	0
								Acrocanthosaurus	Carcharodontosauridae	NCSM 14345	Hendrickx et al., 2020	486	2.2742	-0.77079	0.18894	-2.3243	0.90062	-0.44537	0.21667	0.014432	0.63159	0.26565	-0.28622	0.56049	0.15887	0
								Acrocanthosaurus	Carcharodontosauridae	NCSM 14345	Hendrickx et al., 2020	487	2.3823	-0.44092	0.14099	-1.4396	0.93942	-0.33215	-0.24593	-0.10641	0.47125	0.27726	-0.15518	-0.33928	0.28621	0
								Acrocanthosaurus	Carcharodontosauridae	NCSM 14345	Hendrickx et al., 2020	488	2.3097	-0.11915	-0.18387	-1.8006	0.59258	-0.25314	-0.95026	0.35255	0.17953	0.32115	0.053746	-0.51833	0.16058	0
								Acrocanthosaurus	Carcharodontosauridae	NCSM 14345	Hendrickx et al., 2020	489	1.9879	-0.25273	0.0025685	-0.24098	0.85877	-0.83824	-1.0303	0.71899	0.18619	0.71911	0.10652	-0.42752	0.14536	0
								Acrocanthosaurus	Carcharodontosauridae	NCSM 14345	Hendrickx et al., 2020	490	1.8169	-0.4242	0.25128	-1.32	1.2372	-0.30414	-0.60221	-0.05342	0.38232	0.09083	-0.31791	-0.93924	0.53652	0
								Acrocanthosaurus	Carcharodontosauridae	NCSM 14345	Hendrickx et al., 2020	491	1.6374	-1.187	0.3922	0.14463	0.025483	-0.75385	0.80785	-0.71708	-0.0062086	0.029801	0.12528	-0.64493	0.22682	0
								Acrocanthosaurus	Carcharodontosauridae	NCSM 14345	Hendrickx et al., 2020	492	1.8878	-1.0693	0.31064	-1.0747	-0.21732	-0.86297	1.3225	0.030034	-0.10891	-0.41769	-0.1552	-0.19486	0.26901	0
								Acrocanthosaurus	Carcharodontosauridae	NCSM 14345	Hendrickx et al., 2020	493	2.0255	-0.96835	0.21416	-0.5567	0.00099505	-1.0232	0.59787	0.4626	-0.23017	-0.48957	-0.35633	-0.475	0.43355	0
								Acrocanthosaurus	Carcharodontosauridae	NCSM 14345	Hendrickx et al., 2020	494	2.6265	-1.0208	-0.0067428	-0.76425	-0.49444	-1.1646	0.51358	0.55376	-0.14962	-0.34712	-0.25494	-0.1899	0.30104	0
								Acrocanthosaurus	Carcharodontosauridae	NCSM 14345	Hendrickx et al., 2020	495	2.6774	-1.1163	0.0327	-1.075	-0.53614	-1.201	0.73778	0.53356	-0.18645	-0.45092	-0.28863	-0.043069	0.29287	0
								Acrocanthosaurus	Carcharodontosauridae	NCSM 14345	Hendrickx et al., 2020	496	2.8497	-1.0418	-0.24129	-1.3709	-1.1042	-1.2723	0.42021	0.79785	0.18658	-0.32654	-0.39829	0.039885	0.32807	0
								Acrocanthosaurus	Carcharodontosauridae	NCSM 14345	Hendrickx et al., 2020	497	1.2695	-0.66842	-0.37029	-0.27276	-0.46135	-1.011	-0.91307	1.1526	-0.19033	0.59101	0.31749	0.070786	-0.15846	0
								Acrocanthosaurus	Carcharodontosauridae	NCSM 14345	Hendrickx et al., 2020	498	0.43769	0.1505	-0.42871	-0.092317	-0.30533	-0.47622	-0.82237	1.524	0.0093782	0.63278	0.30909	-0.21861	-0.14339	0
								Acrocanthosaurus	Carcharodontosauridae	NCSM 14345	Hendrickx et al., 2020	499	2.8301	-1.3377	0.17238	-1.1793	-0.13108	-1.4222	0.75795	0.74381	-0.65901	-0.70681	-0.35083	0.1005	0.3022	0
								Acrocanthosaurus	Carcharodontosauridae	NCSM 14345	Hendrickx et al., 2020	500	2.6524	-0.66425	-0.46405	-1.1648	-1.4176	-0.89677	0.28892	0.45725	0.075134	-0.0094052	0.01462	0.70803	-0.16508	0
								Acrocanthosaurus	Carcharodontosauridae	NCSM 14345	Hendrickx et al., 2020	501	2.2782	-1.0988	-0.08193	-0.97606	-0.53554	-1.213	0.20717	0.69284	-0.23806	-0.21234	-0.16396	0.12477	0.15823	0
								Acrocanthosaurus	Carcharodontosauridae	NCSM 14345	Hendrickx et al., 2020	502	1.9254	-0.67099	-0.27339	-0.77522	-0.71399	-0.94274	-0.063322	0.81269	-0.092165	0.031783	-0.023373	0.19725	0.0071247	0
								Acrocanthosaurus	Carcharodontosauridae	NCSM 14345	Hendrickx et al., 2020	503	1.6182	-0.40341	-0.62171	-0.25036	-1.0693	-0.77527	-0.95232	0.75596	0.0034953	0.58723	0.31408	0.5242	-0.33812	0
								Acrocanthosaurus	Carcharodontosauridae	NCSM 14345	Hendrickx et al., 2020	504	0.57559	-0.3645	0.30084	0.58958	0.5495	-0.47159	0.032053	0.33219	0.13366	-0.16332	-0.33742	-1.3525	0.60346	0
								Acrocanthosaurus	Carcharodontosauridae	NCSM 14345	Hendrickx et al., 2020	505	1.7755	-0.88498	0.30045	-0.16147	-0.051636	-0.71473	0.93196	-0.21659	0.0025548	-0.18586	-0.057366	-0.63783	0.30783	0
								Acrocanthosaurus	Carcharodontosauridae	NCSM 14345	Hendrickx et al., 2020	506	2.1537	-1.1332	0.14814	-0.89607	-0.43426	-1.0093	0.85763	0.12391	-0.032054	-0.27614	-0.15761	-0.18349	0.26317	0
								Acrocanthosaurus	Carcharodontosauridae	NCSM 14345	Hendrickx et al., 2020	507	2.1429	-0.7415	0.095572	-0.36905	-0.56482	-0.71124	0.93387	-0.087502	0.35418	-0.13969	-0.14854	-0.65091	0.35907	0
								Acrocanthosaurus	Carcharodontosauridae	NCSM 14345	Hendrickx et al., 2020	508	2.3324	-0.77946	-0.098547	-0.048999	-0.4485	-0.95009	0.097951	0.34595	-0.11866	0.030147	0.026349	-0.28058	0.12554	0
								Acrocanthosaurus	Carcharodontosauridae	NCSM 14345	Hendrickx et al., 2020	509	2.302	-1.5902	0.011032	-0.91096	-0.54118	-1.5012	-0.0087043	0.50566	0.0082776	-0.097676	-0.26138	-0.24843	0.37952	0
								Acrocanthosaurus	Carcharodontosauridae	NCSM 14345	Hendrickx et al., 2020	510	1.8726	-0.60335	-0.29626	0.12202	-0.51053	-1.1738	-0.96023	1.3375	0.59983	0.064684	-0.59072	-1.333	0.77789	0
								Acrocanthosaurus	Carcharodontosauridae	NCSM 14345	Hendrickx et al., 2020	511	1.9321	-0.981	-0.3539	-0.24185	-0.94154	-1.0597	-0.58686	0.36585	0.19226	0.54874	0.22354	0.0050337	-0.05402	0
								Acrocanthosaurus	Carcharodontosauridae	NCSM 14345	Hendrickx et al., 2020	512	1.6298	-0.95759	-0.31576	-0.1133	-0.60352	-1.1972	-0.86181	0.94258	0.16458	0.68846	0.23686	-0.43187	0.079611	0
								Acrocanthosaurus	Carcharodontosauridae	NCSM 14345	Hendrickx et al., 2020	513	1.2553	-0.084446	-0.178	0.1764	0.32202	-0.63226	-0.55496	1.1798	-1.0137	-0.066702	0.19449	0.351	-0.26645	0
								Acrocanthosaurus	Carcharodontosauridae	NCSM 14345	Hendrickx et al., 2020	514	0.52745	0.025966	-0.39895	1.4273	0.70345	-0.88408	-1.8799	2.2575	-0.83911	1.4924	1.1601	-0.73633	-0.46936	0
								Acrocanthosaurus	Carcharodontosauridae	NCSM 14345	Hendrickx et al., 2020	515	2.2387	-1.6032	0.27217	-0.92822	-0.014168	-1.306	0.62809	0.059428	-0.77889	-0.35259	0.031435	0.41497	0.0020244	0
								Acrocanthosaurus	Carcharodontosauridae	NCSM 14345	Hendrickx et al., 2020	516	2.1508	-0.74651	-0.24644	-0.68058	-0.88086	-0.97409	0.078239	0.63598	0.27299	0.046525	-0.1467	-0.2204	0.22057	0
								Eocarcharia	Carcharodontosauridae	MNN GAD14	Hendrickx et al., 2020	517	1.6396	-0.40609	-0.01408	-0.8709	0.27577	-0.60097	-0.95493	-0.47507	-0.48298	0.19403	0.23678	0.55576	-0.27564	0
								Eocarcharia	Carcharodontosauridae	MNN GAD14	Hendrickx et al., 2020	518	1.2179	-0.46724	-0.27015	-1.3802	-0.8131	-0.74903	0.10649	1.0255	0.21466	-0.14692	-0.29826	0.19301	0.15711	0
								Carcharodontosaurus	Carcharodontosauridae	SGM Din-1	Hendrickx et al., 2020	519	2.3478	0.95012	-0.96101	-1.2339	-1.5256	-0.221	0.085074	1.8078	-0.22511	-0.20108	0.0038669	1.2269	-0.4879	0
								Carcharodontosaurus	Carcharodontosauridae	SGM Din-1	Hendrickx et al., 2020	520	2.3686	0.95828	-0.92516	-1.2396	-1.5475	-0.072224	0.21855	1.3494	-0.39439	-0.42647	-0.050249	1.6376	-0.60287	0
								Carcharodontosaurus	Carcharodontosauridae	SGM Din-1	Hendrickx et al., 2020	521	2.3688	0.78947	-0.96087	-1.1726	-1.791	-0.107	0.10579	1.0625	-0.10243	-0.24076	-0.024732	1.5291	-0.56689	0
								Carcharodontosaurus	Carcharodontosauridae	SGM Din-1	Hendrickx et al., 2020	522	2.219	1.1289	-0.96468	-1.2527	-1.7762	0.12457	0.38763	1.1627	-0.067535	-0.34093	-0.052473	1.5165	-0.57527	0
								Carcharodontosaurus	Carcharodontosauridae	SGM Din-1	Hendrickx et al., 2020	523	2.3876	0.55385	-0.75671	-1.6776	-1.3748	-0.36787	0.46833	1.5613	-0.42268	-0.47904	-0.10159	1.4552	-0.45245	0
								Carcharodontosaurus	Carcharodontosauridae	SGM Din-1	Hendrickx et al., 2020	524	2.678	0.60285	-0.78427	-1.6849	-1.6878	-0.19573	0.79386	1.0254	-0.29944	-0.54506	-0.08364	1.6785	-0.54038	0
								Carcharodontosaurus	Carcharodontosauridae	SGM Din-1	Hendrickx et al., 2020	525	2.7841	1.4103	-0.58907	-1.7239	0.89191	0.9825	-0.78584	0.49125	-0.28539	0.081334	0.23946	0.50622	-0.45061	0
								Carcharodontosaurus	Carcharodontosauridae	SGM Din-1	Hendrickx et al., 2020	526	3.0586	1.0893	-0.55944	-1.6044	0.79896	1.2342	-1.3008	-0.94978	-0.84348	-0.32066	0.33533	0.46591	-0.55403	0
								Carcharodontosaurus	Carcharodontosauridae	SGM Din-1	Hendrickx et al., 2020	527	2.854	1.4648	-0.58103	-1.6857	0.5122	1.2742	-1.2157	-0.61991	-1.1685	-0.28498	0.80192	-0.86561	-0.4557	0
								Carcharodontosaurus	Carcharodontosauridae	SGM Din-1	Hendrickx et al., 2020	528	2.8198	1.062	-0.26889	-2.5287	1.1006	1.0795	-0.68372	-0.21574	-1.1869	-0.5923	0.52882	-1.2301	-0.11328	0
								Carcharodontosaurus	Carcharodontosauridae	UCRC PV6	Hendrickx et al., 2020	529	2.9424	1.0745	-0.34944	-3.0966	0.76014	1.4285	-0.17556	-0.63517	-0.42844	-0.38801	0.44977	-0.90119	-0.13914	0
								Carcharodontosaurus	Carcharodontosauridae	MNN IGV6	Hendrickx et al., 2020	530	3.4965	0.30952	-0.1625	-1.2416	1.3885	0.69831	-0.92234	-0.96931	-0.76365	-0.047511	0.46058	-0.33333	-0.26243	0
								Carcharodontosaurus	Carcharodontosauridae	MNN IGV10	Hendrickx et al., 2020	531	2.504	0.083808	0.08867	-0.8138	1.6885	0.073475	-0.46387	0.11542	0.051719	0.33341	-0.013772	0.11308	-0.0053096	0
								Carcharodontosaurus	Carcharodontosauridae	MNN GAD12	Hendrickx et al., 2020	532	2.5557	-0.52054	0.13069	-1.6516	1.6718	-0.47073	-0.42283	0.64688	0.073416	0.24302	-0.28767	0.76085	0.04889	0
								Carcharodontosaurus	Carcharodontosauridae	SMNS uncatalogued, largest one	Hendrickx et al., 2020	533	3.2413	1.0218	-0.13845	-1.8338	1.5575	1.1513	-0.034867	-0.22127	-0.14553	-0.19409	0.13614	-0.69055	0.016907	0
								Carcharodontosaurus	Carcharodontosauridae	SMNS uncatalogued, medium one	Hendrickx et al., 2020	534	2.3381	0.94983	-0.15968	-1.2463	0.81477	0.95454	-0.89836	-1.0285	-1.1855	-0.28463	0.82772	-1.5534	-0.1985	0
								Carcharodontosaurus	Carcharodontosauridae	SMNS uncatalogued, small white	Hendrickx et al., 2020	535	2.1386	1.042	-0.26664	-0.22272	0.95124	0.86972	-1.5585	-1.0437	-1.1525	-0.16596	0.6027	-0.6921	-0.36477	0
								Giganotosaurus	Carcharodontosauridae	MUCPV-CH-1	Hendrickx et al., 2020	536	2.7567	0.24869	0.14925	-1.28	1.8113	0.44191	0.26997	-0.0048847	0.55611	0.26521	-0.21039	0.1614	0.10776	0
								Giganotosaurus	Carcharodontosauridae	MUCPV-CH-1	Hendrickx et al., 2020	537	2.8943	0.52921	-0.091446	-1.4728	1.3205	0.75856	-0.34201	-0.49997	-0.066033	0.11815	0.25689	-0.49989	-0.058724	0
								Giganotosaurus	Carcharodontosauridae	MUCPV-CH-1	Hendrickx et al., 2020	538	2.9173	0.7603	0.066452	-1.8284	1.5913	1.2075	0.484	-0.88302	-0.22952	-0.10864	0.35356	-0.25521	-0.20425	0
								Giganotosaurus	Carcharodontosauridae	MUCPV-CH-1	Hendrickx et al., 2020	539	2.4824	0.51626	0.095793	-1.037	1.6966	0.44893	0.24612	0.009665	-0.045282	0.076572	-0.078006	0.96263	-0.25998	0
								Giganotosaurus	Carcharodontosauridae	MUCPV-CH-1	Hendrickx et al., 2020	540	2.5592	0.76072	-0.24376	-1.8687	0.62675	1.2169	-0.5636	-1.6164	-0.75011	-0.33579	0.54113	-0.15898	-0.43068	0
								Giganotosaurus	Carcharodontosauridae	MUCPV-CH-1	Hendrickx et al., 2020	541	2.5705	0.0058974	-0.13915	-0.7317	0.6964	0.23056	-0.17049	-0.49724	1.6374	1.0643	-0.12421	0.32194	0.053585	0
								Giganotosaurus	Carcharodontosauridae	MUCPV-CH-1	Hendrickx et al., 2020	542	1.8202	1.3173	-0.40723	-0.93422	0.109	0.88705	-1.0841	-0.76262	-0.87235	-0.10833	0.74843	-0.9442	-0.36594	0
								Mapusaurus	Carcharodontosauridae	MCF-PVPH-108.166	Hendrickx et al., 2020	543	1.9324	0.14882	0.16125	0.77563	1.4489	0.076839	-0.49176	-0.92638	0.29973	0.20464	-0.47409	1.7297	-0.27036	0
								Mapusaurus	Carcharodontosauridae	MCF-PVPH-108.8	Hendrickx et al., 2020	544	2.7879	-0.58532	0.053347	-1.0948	1.8196	-0.39135	-0.65577	0.30597	0.13094	0.51105	-0.23487	1.624	-0.24605	0
								Mapusaurus	Carcharodontosauridae	MCF-PVPH-108.9	Hendrickx et al., 2020	545	2.6729	-0.090855	0.21757	-1.6338	1.4592	0.5263	-0.23712	-1.3131	-0.9325	-0.22998	0.52074	-0.45615	-0.19915	0
								Mapusaurus	Carcharodontosauridae	MCF-PVPH-108.171	Hendrickx et al., 2020	546	2.3276	0.31983	-0.01253	-0.93052	1.2019	0.45856	-0.79568	-0.83563	-0.7321	-0.035331	0.40002	-0.20514	-0.25219	0
								Mapusaurus	Carcharodontosauridae	MCF-PVPH-108.10	Hendrickx et al., 2020	547	1.699	0.19209	-0.038721	-0.74021	1.0981	-0.049321	-1.1015	0.18555	-0.14009	0.50475	0.3439	-0.78391	0.024682	0
								Mapusaurus	Carcharodontosauridae	MCF-PVPH-108.141	Hendrickx et al., 2020	548	1.6851	0.19014	-0.00090615	-0.65206	0.77484	-0.028764	-1.2692	-0.37872	-0.78467	0.28306	0.75082	-1.6566	0.0070481	0
								Mapusaurus	Carcharodontosauridae	MCF-PVPH-108.103	Hendrickx et al., 2020	549	1.259	1.4963	-0.69943	0.63694	-0.12641	0.88296	-3.036	-1.4128	-1.2244	-0.33025	0.41023	-0.54346	-0.43851	0
								Ornitholestes	Basal Coelurosauria	AMNH 619	Hendrickx et al., 2020	550	-4.5548	1.8893	0.10112	0.21924	1.0516	1.4149	0.17995	-0.23643	0.6218	0.40698	0.11851	-0.32828	-0.15172	0
								Ornitholestes	Basal Coelurosauria	AMNH 619	Hendrickx et al., 2020	551	-2.9853	-1.3795	0.83376	-0.93792	2.8594	-0.95684	-0.96829	-0.15329	-2.681	-0.87928	-0.090908	2.1132	-0.527	0
								Ornitholestes	Basal Coelurosauria	AMNH 619	Hendrickx et al., 2020	552	-4.6786	2.2188	-0.19595	0.59401	0.85393	1.5631	-0.58146	-0.15778	0.48303	0.57035	0.22206	0.13275	-0.41899	0
								Ornitholestes	Basal Coelurosauria	AMNH 619	Hendrickx et al., 2020	553	-5.1561	2.434	-0.20481	0.69081	0.99685	1.6876	-0.68059	0.096264	0.54992	0.74926	0.3211	-0.061179	-0.4311	0
								Ornitholestes	Basal Coelurosauria	AMNH 619	Hendrickx et al., 2020	554	-4.2142	1.6501	0.3582	1.0883	1.2093	1.7751	0.38502	-2.197	0.20427	-0.17093	-0.038573	0.34667	-0.32395	0
								Ornitholestes	Basal Coelurosauria	AMNH 619	Hendrickx et al., 2020	555	-3.883	1.8162	0.034761	1.285	1.1704	1.3414	-0.45	-0.74048	0.27108	0.39026	0.17196	-0.22367	-0.25966	0
								Ornitholestes	Basal Coelurosauria	AMNH 619	Hendrickx et al., 2020	556	-4.2466	1.6799	0.36887	1.1926	1.4181	1.5963	0.3065	-1.5399	0.2867	0.12317	0.10719	-0.23883	-0.20347	0
								Ornitholestes	Basal Coelurosauria	AMNH 619	Hendrickx et al., 2020	557	-4.0551	1.6532	0.2086	0.58463	1.1811	1.2908	0.25784	-0.60015	0.46495	0.33122	0.14011	-0.42016	-0.12319	0
								Ornitholestes	Basal Coelurosauria	AMNH 619	Hendrickx et al., 2020	558	-3.642	-1.5439	1.1284	-0.48615	3.7336	-1.0512	-1.1667	0.038229	-3.052	-0.81324	0.014681	1.6796	-0.4431	0
								Ornitholestes	Basal Coelurosauria	AMNH 619	Hendrickx et al., 2020	559	-5.1891	2.1576	0.073252	0.26481	0.93369	1.9076	0.14488	-1.0105	0.5524	0.19366	0.047893	0.37653	-0.39302	0
								Proceratosaurus	Non-tyrannosaurid Tyrannosauroidea	BMBH R4860	Hendrickx et al., 2020	560	-1.9435	-1.3367	0.053644	-0.90892	-0.38952	-0.82241	-0.5316	-1.0069	1.3495	1.167	0.17027	-0.40414	0.21622	0
								Proceratosaurus	Non-tyrannosaurid Tyrannosauroidea	BMBH R4860	Hendrickx et al., 2020	561	-1.9819	-1.6722	0.16435	-1.1856	-0.13884	-1.0681	-0.58574	-0.86304	1.0411	1.03	0.12592	-0.2171	0.21832	0
								Proceratosaurus	Non-tyrannosaurid Tyrannosauroidea	BMBH R4860	Hendrickx et al., 2020	562	-1.9343	-1.391	0.13247	-0.91385	0.018556	-0.93961	-0.63158	-0.743	0.82668	0.97318	0.17748	-0.15864	0.13234	0
								Proceratosaurus	Non-tyrannosaurid Tyrannosauroidea	BMBH R4860	Hendrickx et al., 2020	563	-2.0611	-1.3064	0.11209	-0.82913	0.095916	-0.95799	-0.77625	-0.4861	0.8886	1.0442	0.16194	-0.37783	0.20322	0
								Proceratosaurus	Non-tyrannosaurid Tyrannosauroidea	BMBH R4860	Hendrickx et al., 2020	564	-3.0029	-1.3642	0.68018	0.98595	1.1642	-0.4377	-0.70663	-2.1039	0.75626	1.1191	0.34817	-1.1452	0.28253	0
								Proceratosaurus	Non-tyrannosaurid Tyrannosauroidea	BMBH R4860	Hendrickx et al., 2020	565	-2.6688	-1.7304	0.60877	-0.0057244	0.57884	-0.70472	-0.32552	-1.9662	1.1387	1.1366	0.25193	-1.0078	0.37118	0
								Proceratosaurus	Non-tyrannosaurid Tyrannosauroidea	BMBH R4860	Hendrickx et al., 2020	566	-2.2656	-1.6554	0.30441	-0.10616	0.32628	-1.0444	-0.97104	-0.99862	1.2157	1.358	0.23146	-1.1511	0.43022	0
								Proceratosaurus	Non-tyrannosaurid Tyrannosauroidea	BMBH R4860	Hendrickx et al., 2020	567	-2.199	-1.7412	0.51429	-0.33349	0.48451	-0.88233	-0.31575	-1.576	0.90916	0.97435	0.1969	-0.72169	0.32103	0
								Proceratosaurus	Non-tyrannosaurid Tyrannosauroidea	BMBH R4860	Hendrickx et al., 2020	568	-2.1524	-1.604	0.33578	-0.22045	0.35997	-0.90945	-0.7268	-1.3062	0.86581	1.1198	0.26888	-0.58715	0.21738	0
								Guanlong	Non-tyrannosaurid Tyrannosauroidea	IVPP V14531	Hendrickx et al., 2020	569	-2.1029	0.81068	0.61945	2.4142	1.9867	0.44747	0.1396	-0.83565	0.32797	0.40381	0.11912	-2.2583	0.52914	0
								Guanlong	Non-tyrannosaurid Tyrannosauroidea	IVPP V14531	Hendrickx et al., 2020	570	-1.7195	1.0067	-0.0077842	0.61654	0.7967	0.16895	-0.17014	0.47573	0.59577	0.31003	-0.15594	-1.2482	0.39203	0
								Guanlong	Non-tyrannosaurid Tyrannosauroidea	IVPP V14531	Hendrickx et al., 2020	571	-1.1091	0.30265	-0.097101	-0.65082	0.39718	-0.2766	0.0036127	0.40925	-0.071899	0.1203	0.019703	0.27779	-0.096991	0
								Guanlong	Non-tyrannosaurid Tyrannosauroidea	IVPP V14531	Hendrickx et al., 2020	572	-1.2777	0.41708	-0.17759	-0.73032	0.50384	-0.52263	-0.56868	1.3631	0.27004	-0.061714	-0.51925	-0.46761	0.43078	0
								Guanlong	Non-tyrannosaurid Tyrannosauroidea	IVPP V14531	Hendrickx et al., 2020	573	-1.4233	0.90055	-0.29004	-0.086877	0.2548	0.065522	-0.28303	0.57443	0.28277	0.46145	0.14874	-0.1073	-0.11625	0
								Guanlong	Non-tyrannosaurid Tyrannosauroidea	IVPP V14531	Hendrickx et al., 2020	574	-1.4075	0.30067	-0.32652	-0.72364	0.70987	-0.745	-1.0452	1.9316	-0.43518	0.58207	0.26407	0.19754	-0.19742	0
								Dilong	Non-tyrannosaurid Tyrannosauroidea	IVPP 14242	Hendrickx et al., 2020	575	-5.1204	-0.79072	2.1628	0.058107	4.4401	0.19389	2.0746	-1.2055	-1.2277	-0.61013	0.063625	-1.4432	0.52524	0
								Dilong	Non-tyrannosaurid Tyrannosauroidea	IVPP 14242	Hendrickx et al., 2020	576	-3.5084	-1.0045	0.22904	-1.0272	0.26104	-0.27073	-0.62565	-1.3549	0.68194	0.81885	0.17812	0.53231	-0.15062	0
								Dilong	Non-tyrannosaurid Tyrannosauroidea	IVPP 14242	Hendrickx et al., 2020	577	-4.125	0.47753	0.19805	-0.77482	1.5971	0.36065	-0.83039	-0.018139	-1.0957	-0.25527	-0.023855	1.648	-0.58761	0
								Dilong	Non-tyrannosaurid Tyrannosauroidea	IVPP 14242	Hendrickx et al., 2020	578	-3.9064	-0.043732	0.82484	-0.018931	2.6873	0.012763	-0.15422	-0.040137	-1.1741	-0.19104	0.077686	0.1033	-0.086466	0
								Dilong	Non-tyrannosaurid Tyrannosauroidea	IVPP 14242	Hendrickx et al., 2020	579	-3.6417	-3.4572	2.6653	1.3641	2.6715	0.31482	-0.51733	-0.19466	3.7864	-5.7166	5.1455	0.40397	-2.8876	0
								Dilong	Non-tyrannosaurid Tyrannosauroidea	IVPP 14242	Hendrickx et al., 2020	580	-3.1007	-3.3284	2.1625	1.2728	2.1669	-0.13657	-1.8457	1.2046	4.1419	-5.8088	4.9304	0.32047	-2.7641	0
								Dilong	Non-tyrannosaurid Tyrannosauroidea	IVPP 14242	Hendrickx et al., 2020	581	-3.9352	-0.95184	0.2823	-0.98551	0.30064	-0.35939	-0.64015	-0.79226	1.426	1.1371	0.044666	-0.67879	0.32985	0
								Dilong	Non-tyrannosaurid Tyrannosauroidea	IVPP 14242	Hendrickx et al., 2020	582	-4.3602	0.42788	0.45814	-1.4098	1.662	0.378	0.22992	0.22958	-0.5964	-0.19777	-0.032661	0.87214	-0.27389	0
								Dilong	Non-tyrannosaurid Tyrannosauroidea	IVPP 14242	Hendrickx et al., 2020	583	-3.9787	0.16899	0.73861	0.12974	2.7638	-0.15737	-0.63339	0.82489	-0.7384	-0.24772	-0.35503	-0.81868	0.42865	0
								Dilong	Non-tyrannosaurid Tyrannosauroidea	IVPP 14242	Hendrickx et al., 2020	585	-4.132	0.36516	0.49453	-1.1434	1.8723	0.12098	-0.041841	0.70437	-0.44507	-0.26486	-0.29207	0.15263	0.10394	0
								Dilong	Non-tyrannosaurid Tyrannosauroidea	IVPP 14242	Hendrickx et al., 2020	586	-4.2551	0.95624	-0.015417	-0.4128	1.4968	0.44171	-1.1066	0.71849	-0.7538	0.29896	0.25017	1.0284	-0.57736	0
								Dilong	Non-tyrannosaurid Tyrannosauroidea	IVPP 14243	Hendrickx et al., 2020	587	-4.7047	-0.40565	1.3654	0.6209	2.3857	0.28333	0.30225	-1.6151	1.4059	-0.75293	-1.5526	-2.8804	1.7901	0
								Eotyrannus	Non-tyrannosaurid Tyrannosauroidea	MIWG 1997.550	Hendrickx et al., 2015	588	-2.138	-0.22111	0.98492	1.8737	0.20961	-1.8379	2.3263	1.0539	2.3989	1.1599	-1.1089	2.9099	0.072645	0
								Raptorex	Non-tyrannosaurid Tyrannosauroidea	LH PV18	Hendrickx et al., 2015	589	-4.0963	-0.2913	1.7147	3.2047	0.18059	-2.1579	2.7216	0.22917	1.7599	0.71893	-0.81632	0.43448	0.6269	0
								Raptorex	Non-tyrannosaurid Tyrannosauroidea	LH PV18	Hendrickx et al., 2015	590	-3.2017	-0.2807	1.45	2.8434	0.15362	-1.8103	2.2936	-0.20945	1.464	0.76415	-0.55492	0.83526	0.31262	0
								Raptorex	Non-tyrannosaurid Tyrannosauroidea	LH PV18	Hendrickx et al., 2015	591	-3.0918	-0.29865	1.3147	3.2089	-0.36414	-1.5706	1.9619	-1.4957	1.139	0.38917	-0.66105	2.0109	-0.05769	0
								Raptorex	Non-tyrannosaurid Tyrannosauroidea	LH PV18	Hendrickx et al., 2015	592	-4.1792	-0.23526	1.9151	2.4389	0.32275	-2.8251	4.4105	1.9484	1.8744	0.45977	-1.3477	2.3847	0.46952	0
								Raptorex	Non-tyrannosaurid Tyrannosauroidea	LH PV18	Hendrickx et al., 2015	593	-1.528	0.59933	0.037024	-0.29984	-1.3774	-0.93657	0.20583	0.69012	1.0543	0.62916	-0.077003	0.17547	0.045688	0
								Raptorex	Non-tyrannosaurid Tyrannosauroidea	LH PV18	Hendrickx et al., 2015	594	-1.4896	0.4199	0.23401	-1.1296	-1.5178	-0.74094	0.39826	-0.22948	-0.0054829	-0.11425	0.27374	-0.77192	0.080989	0
								Raptorex	Non-tyrannosaurid Tyrannosauroidea	LH PV18	Hendrickx et al., 2015	595	-1.4894	1.3524	0.057705	-1.0203	-1.3406	0.10213	0.31511	-0.61308	-0.84014	-0.56829	0.50379	-0.26096	-0.37004	0
								Raptorex	Non-tyrannosaurid Tyrannosauroidea	LH PV18	Hendrickx et al., 2015	596	-1.8133	0.95947	-0.2332	0.86692	-2.1265	-1.1345	-1.3404	-0.037871	-0.92277	-0.16234	0.31223	0.46743	-0.46894	0
								Raptorex	Non-tyrannosaurid Tyrannosauroidea	LH PV18	Hendrickx et al., 2015	597	-2.0694	0.36146	0.19044	-0.032055	-1.0639	-1.245	-0.52194	0.62425	-0.41416	0.41693	0.5262	-0.392	-0.17015	0
								Raptorex	Non-tyrannosaurid Tyrannosauroidea	LH PV18	Hendrickx et al., 2015	598	-1.4309	0.41224	0.024842	-0.6041	-1.2495	-0.74779	-0.80656	-0.10723	-0.58114	0.33787	0.83425	-1.0904	-0.19032	0
								Raptorex	Non-tyrannosaurid Tyrannosauroidea	LH PV18	Hendrickx et al., 2015	599	-1.5352	0.155	-0.67228	-1.1385	-1.0061	-0.035622	-1.1383	-0.71256	0.38415	0.2232	-0.16499	1.9105	-0.54205	0
								Raptorex	Non-tyrannosaurid Tyrannosauroidea	LH PV18	Hendrickx et al., 2015	600	-1.3079	0.80787	-0.11625	-1.0408	-1.6367	-0.44952	0.011245	-0.18738	-0.078792	-0.088257	0.14728	0.9737	-0.4372	0
								Raptorex	Non-tyrannosaurid Tyrannosauroidea	LH PV18	Hendrickx et al., 2015	601	-1.2385	0.20553	0.34518	-1.0634	-1.1514	-0.9728	0.5688	-0.0050664	-0.20572	-0.2057	0.15001	-0.21212	0.017786	0
								Raptorex	Non-tyrannosaurid Tyrannosauroidea	LH PV18	Hendrickx et al., 2015	602	-1.6147	0.2074	0.59467	0.10767	-0.92557	-0.79765	1.3146	-0.89821	0.24794	-0.050565	-0.065052	1.1635	-0.25484	0
								Raptorex	Non-tyrannosaurid Tyrannosauroidea	LH PV18	Hendrickx et al., 2015	603	-1.9239	1.2411	-0.14746	-1.0135	-1.404	-1.3506	-0.61298	2.5625	-0.075854	-0.46902	-0.56527	-0.54367	0.43298	0
								Raptorex	Non-tyrannosaurid Tyrannosauroidea	LH PV18	Hendrickx et al., 2015	604	-2.2387	0.55327	0.43018	0.11774	-1.3717	-1.1458	0.89937	0.40115	0.82909	0.19446	-0.22438	-0.1947	0.25214	0
								Raptorex	Non-tyrannosaurid Tyrannosauroidea	LH PV18	Hendrickx et al., 2015	605	-1.9552	0.86816	-0.14126	-0.54895	-1.8882	-0.96522	-0.71665	0.50083	-0.87957	0.15686	0.81396	-0.39183	-0.42892	0
								Alioramus	Tyrannosauridae	IGM 100/1844	Hendrickx et al., 2015	606	-0.287	0.73034	0.16903	-0.0019633	-0.36875	-0.031648	-0.21006	-0.95662	-0.45607	-0.08202	0.41581	-0.49193	-0.18871	0
								Alioramus	Tyrannosauridae	IGM 100/1844	Hendrickx et al., 2015	607	-0.50241	0.80947	0.093032	0.1304	-0.51896	-0.43842	-0.64969	-0.13589	-0.88386	0.070429	0.73816	-1.2535	-0.14683	0
								Alioramus	Tyrannosauridae	IGM 100/1844	Hendrickx et al., 2015	608	-0.64498	0.77911	-0.013774	-0.36982	-0.42518	-0.43044	-0.78148	0.42102	-0.43036	0.36855	0.64807	-1.1744	-0.082872	0
								Alioramus	Tyrannosauridae	IGM 100/1844	Young et al., 2019 (C.H. pers. measurements)	609	-0.21099	0.09822	0.46762	-0.95093	-0.292	-0.57496	1.2856	-0.30853	0.38052	0.062344	-0.01902	0.55408	-0.064101	0
								Alioramus	Tyrannosauridae	IGM 100/1844	Hendrickx et al., 2015	610	0.61905	0.24405	0.079285	-1.04	-0.58495	0.04616	0.27513	-1.5287	-0.13473	-0.25523	0.086551	1.1186	-0.42569	0
								Alioramus	Tyrannosauridae	IGM 100/1844	Hendrickx et al., 2015	611	0.22532	0.61315	-0.1236	-1.3612	-0.8697	0.20725	-0.39449	-1.3404	-0.70786	-0.49363	0.29087	0.59516	-0.47332	0
								Alioramus	Tyrannosauridae	IGM 100/1844	Hendrickx et al., 2015	612	0.17174	0.76727	-0.24129	-0.77847	-1.1421	0.27393	-1.0289	-1.6969	-0.84243	-0.51536	0.38355	0.035835	-0.42115	0
								Alioramus	Tyrannosauridae	IGM 100/1844	Hendrickx et al., 2015	613	0.1714	0.54676	-0.20042	-0.7869	-0.80591	0.01362	-1.3283	-1.2844	-1.1473	-0.42059	0.4896	-0.029301	-0.43718	0
								Alioramus	Tyrannosauridae	IGM 100/1844	Hendrickx et al., 2015	614	-0.78719	0.71919	-0.10545	-1.3195	-0.87826	-0.71691	-0.72995	1.0464	-0.34259	0.016524	0.29054	-1.1054	0.12326	0
								Alioramus	Tyrannosauridae	IGM 100/1844	Hendrickx et al., 2015	615	-0.90631	1.0112	-0.12681	-0.034716	-1.149	-0.15689	-0.97287	-0.69037	-0.8213	-0.029212	0.70383	-0.70561	-0.35229	0
								Alioramus	Tyrannosauridae	IGM 100/1844	Hendrickx et al., 2015	616	-0.16363	0.49296	-0.010255	-0.15269	-0.60939	-0.30696	-0.44964	-0.61611	-0.0020016	0.17097	0.15961	0.4697	-0.28327	0
								Alioramus	Tyrannosauridae	IGM 100/1844	Hendrickx et al., 2015	617	-0.42758	0.23362	0.28562	-0.096858	-0.54545	-0.53283	0.61045	-0.62914	0.55653	0.25321	-0.095705	1.0021	-0.20235	0
								Alioramus	Tyrannosauridae	IGM 100/1844	Hendrickx et al., 2015	618	-0.37349	0.20906	-0.015368	-0.74094	-0.93615	-0.43902	-0.52951	-0.80704	-0.19852	0.067106	0.25816	0.47433	-0.32352	0
								Alioramus	Tyrannosauridae	IGM 100/1844	Hendrickx et al., 2015	619	-0.58132	0.50333	0.04527	-0.73273	-0.6091	-0.56597	-0.5578	0.1698	-0.49734	0.16673	0.53898	-0.78141	-0.11161	0
								Alioramus	Tyrannosauridae	IGM 100/1844	Hendrickx et al., 2015	620	-0.49041	0.73261	-0.15731	-0.052097	-1.203	-0.071283	-0.87512	-1.2209	-0.18586	0.0083888	0.30693	0.056826	-0.32164	0
								Alioramus	Tyrannosauridae	IGM 100/1844	Hendrickx et al., 2015	621	-1.1332	0.35508	0.080116	0.29416	-0.59115	-0.93021	-1.1516	0.18168	-0.787	0.49578	0.79592	-0.7566	-0.26648	0
								Gorgosaurus	Tyrannosauridae	ROM 1247	Smith et al., 2005	622	0.38211	0.19949	0.28966	1.8573	0.40831	0.41743	0.31236	-1.3621	0.081178	0.12065	0.21248	-0.87326	0.036874	0
								Gorgosaurus	Tyrannosauridae	ROM 1247	Smith et al., 2005	623	1.2185	-0.20178	0.40435	0.67765	0.63433	-0.096808	0.95802	-0.59257	-0.74981	-0.39648	0.17733	-0.15444	-0.089912	0
								Gorgosaurus	Tyrannosauridae	ROM 1247	Smith et al., 2005	624	0.94364	0.3096	-0.3882	-0.48243	-0.824	-0.13462	0.1246	0.70138	0.3296	0.14806	0.020384	0.047084	-0.074775	0
								Gorgosaurus	Tyrannosauridae	ROM 1247	Smith et al., 2005	625	1.1779	0.012227	-0.10657	-0.51432	-0.26167	-0.49124	0.15451	1.0641	0.24015	-0.49208	-0.62491	-0.62684	0.52435	0
								Gorgosaurus	Tyrannosauridae	ROM 1247	Smith et al., 2005	626	1.4233	-0.42978	0.22265	0.30818	0.3755	-0.36527	0.47761	-0.34353	-0.89868	-0.42397	0.10701	0.35317	-0.19162	0
								Gorgosaurus	Tyrannosauridae	ROM 1247	Smith et al., 2005	627	0.49087	0.35302	-0.49368	-0.56624	-0.97823	0.19418	-0.28303	-0.15002	-0.13715	-0.20463	-0.066171	1.4088	-0.5097	0
								Gorgosaurus	Tyrannosauridae	ROM 1247	Smith et al., 2005	628	0.95435	0.05849	0.022688	-0.03802	0.2257	-0.26637	0.30106	0.5928	-0.55203	-0.27539	0.014347	0.039601	-0.066438	0
								Gorgosaurus	Tyrannosauridae	ROM 1247	Smith et al., 2005	629	0.57445	-0.24589	-0.25712	-0.93437	-0.34563	-0.80309	-0.75828	1.661	0.38578	-0.4193	-0.88918	-0.56031	0.67372	0
								Gorgosaurus	Tyrannosauridae	ROM 1247	Smith et al., 2005	630	0.30569	0.056307	-0.10198	0.91813	0.16976	-0.098162	-0.66291	0.020742	-0.31161	0.26964	0.24254	-0.073194	-0.20179	0
								Gorgosaurus	Tyrannosauridae	ROM 1247	Smith et al., 2005	631	1.662	0.21653	-0.24721	-0.66238	-0.44043	-0.24168	0.55147	0.65395	-0.58305	-0.43782	-0.0014376	0.78598	-0.29553	0
								Gorgosaurus	Tyrannosauridae	ROM 1247	Smith et al., 2005	632	1.1927	0.25484	-0.43121	0.22655	-1.2039	0.40326	-0.20858	-1.5245	-0.032116	-0.56988	-0.32401	1.5011	-0.43413	0
								Gorgosaurus	Tyrannosauridae	USNM 12814	Hendrickx et al., 2015	633	1.4831	0.63591	-0.1397	0.21597	1.0187	-0.28655	-0.23705	1.201	1.2116	0.94066	-0.48089	1.6413	-0.16817	0
								Gorgosaurus	Tyrannosauridae	USNM 12814	Hendrickx et al., 2015	634	1.3434	0.51918	0.044321	-0.018872	1.0676	-0.0098215	-0.31605	0.3957	0.84721	0.70343	-0.14973	0.010903	0.099417	0
								Gorgosaurus	Tyrannosauridae	USNM 12814	Hendrickx et al., 2015	635	1.3417	0.51215	0.14725	0.11581	0.87279	0.14681	0.16802	-0.3253	0.79232	0.56283	-0.090214	0.33773	-0.041195	0
								Gorgosaurus	Tyrannosauridae	USNM 12814	Hendrickx et al., 2015	636	0.78338	0.69569	0.10206	0.33427	1.1556	-0.091418	-0.4438	0.70162	0.75552	0.69843	-0.15743	-0.2944	0.17876	0
								Gorgosaurus	Tyrannosauridae	USNM 12814	Hendrickx et al., 2015	637	0.98812	0.87604	-0.014838	0.97427	0.74872	-0.33484	-0.85618	0.7143	-0.072889	0.6907	0.3661	-0.71945	-0.049504	0
								Gorgosaurus	Tyrannosauridae	USNM 12814	Hendrickx et al., 2015	638	-0.20634	0.95786	-0.23772	1.5592	0.11571	-1.0293	-1.3743	1.8637	0.038798	1.4227	0.62903	0.069371	-0.39827	0
								Gorgosaurus	Tyrannosauridae	TMP 86.144.01	Young et al., 2019 (C.H. pers. measurements)	639	0.33753	-0.062287	0.050849	-0.097988	-0.55133	-0.43576	-0.38835	-1.4088	0.19282	-0.20257	-0.49003	2.1563	-0.38553	0
								Gorgosaurus	Tyrannosauridae	TMP 86.144.01	Young et al., 2019 (C.H. pers. measurements)	640	0.43044	-0.059822	0.31829	-0.039449	0.15539	-0.2798	-0.13167	-1.393	-0.27459	-0.10289	0.029705	0.75245	-0.25592	0
								Gorgosaurus	Tyrannosauridae	TMP 86.144.01	Young et al., 2019 (C.H. pers. measurements)	641	0.097462	0.0085863	0.077782	0.15467	-0.45212	-0.39437	-0.7531	-1.2168	0.15151	0.34608	0.18702	0.18774	-0.18112	0
								Gorgosaurus	Tyrannosauridae	TMP 86.144.01	Young et al., 2019 (C.H. pers. measurements)	642	-0.93089	0.28952	0.42021	0.59851	0.14646	-1.071	0.85218	0.96018	1.2824	0.68028	-0.62414	1.6248	0.0042114	0
								Gorgosaurus	Tyrannosauridae	TMP 86.144.01	Young et al., 2019 (C.H. pers. measurements)	643	0.9273	-0.0093774	0.20326	-0.98761	0.099745	-0.046081	0.22332	-1.229	-0.13159	-0.051848	0.12858	0.87178	-0.33056	0
								Gorgosaurus	Tyrannosauridae	TMP 86.144.01	Young et al., 2019 (C.H. pers. measurements)	644	0.65067	-0.21072	0.38513	-0.56041	0.080852	-0.17563	0.03651	-1.8126	-0.65659	-0.29727	0.28747	0.29038	-0.2684	0
								Gorgosaurus	Tyrannosauridae	TMP 86.144.01	Young et al., 2019 (C.H. pers. measurements)	645	0.47989	-0.37259	0.19951	-0.32641	-0.24788	-0.49161	-0.59182	-1.4601	-0.2232	0.087032	0.1966	0.34602	-0.20634	0
								Gorgosaurus	Tyrannosauridae	TMP 86.144.01	Young et al., 2019 (C.H. pers. measurements)	646	0.42258	-0.064043	0.20731	0.32661	-0.066788	-0.42934	-0.2205	-1.1542	0.37686	0.25801	-0.1508	1.0329	-0.20598	0
								Gorgosaurus	Tyrannosauridae	TMP 86.144.01	Young et al., 2019 (C.H. pers. measurements)	647	0.19953	0.32809	-0.11787	0.16987	-0.26294	-0.57891	-1.3557	-0.47048	-0.74241	-0.31684	-0.22356	1.5865	-0.44779	0
								Daspletosaurus	Tyrannosauridae	BMNH R4863	Smith et al., 2005	648	2.2963	0.071577	-0.20812	0.89149	-0.49051	-0.22337	0.19473	-0.31734	-0.1626	-0.0554	0.1276	-0.10896	-0.1116	0
								Daspletosaurus	Tyrannosauridae	BMNH R4863	Smith et al., 2005	649	1.9523	0.12527	-0.36196	1.046	-0.66559	-0.31018	-0.29016	0.12772	0.30487	0.46951	0.25558	-0.64787	-0.0074067	0
								Daspletosaurus	Tyrannosauridae	BMNH R4863	Smith et al., 2005	650	1.8697	0.15815	0.045558	0.69513	-0.036301	-0.1353	0.74962	-0.078046	-0.18987	-0.19075	0.084946	-0.5188	0.054467	0
								Daspletosaurus	Tyrannosauridae	BMNH R4863	Hendrickx et al., 2015	651	0.19024	-2.6757	1.5397	1.3658	2.2745	-2.5263	1.9424	0.32626	2.5808	1.7871	-1.0629	2.3886	0.47878	0
								Daspletosaurus	Tyrannosauridae	BMNH R4863	Hendrickx et al., 2015	652	2.3025	0.059391	-0.067237	0.12114	0.52221	-0.26391	-0.25893	-0.22328	1.1016	0.86617	-0.13651	0.58996	-0.035746	0
								Daspletosaurus	Tyrannosauridae	BMNH R4863	Hendrickx et al., 2015	653	2.2282	0.12736	-0.051101	0.14676	1.3921	-0.30199	-1.0767	0.48809	0.19213	0.80914	0.14196	-0.024286	-0.051917	0
								Daspletosaurus	Tyrannosauridae	BMNH R4863	Hendrickx et al., 2015	654	2.0781	0.11593	0.13678	-0.12284	0.95991	0.042466	-0.043292	-0.60876	0.57692	0.53216	0.014627	0.18486	-0.033564	0
								Daspletosaurus	Tyrannosauridae	BMNH R4863	Hendrickx et al., 2015	655	1.1529	-0.016288	-0.1293	1.485	0.43088	-0.54287	-2.0213	-0.85096	0.079327	0.38058	-0.33811	1.1533	-0.21544	0
								Daspletosaurus	Tyrannosauridae	BMNH R4863	Hendrickx et al., 2015	656	2.15	0.30854	0.10354	-0.095466	1.0453	0.22852	0.38718	-0.45687	1.1579	0.71908	-0.19555	0.79425	-0.077848	0
								Daspletosaurus	Tyrannosauridae	AMNH 5346	Smith et al., 2005	657	2.1865	-0.7436	0.42526	0.04797	0.00044698	-0.62649	1.474	-0.34235	0.22438	-0.36232	-0.20171	-1.2006	0.56039	0
								Daspletosaurus	Tyrannosauridae	MOR 590	Smith et al., 2005	658	0.98355	0.10453	0.013774	0.63467	-0.095773	-0.017491	0.35553	-0.23583	0.039268	0.061666	0.13159	-0.43669	0.001057	0
								Daspletosaurus	Tyrannosauridae	MOR 590	Smith et al., 2005	659	1.6732	-0.011897	0.12878	0.60769	-0.1316	-0.1313	0.9279	-0.32463	0.14565	-0.07346	0.070733	-0.79977	0.17868	0
								Daspletosaurus	Tyrannosauridae	MOR 590	Smith et al., 2005	660	1.8304	-0.72276	0.40249	0.16831	0.55153	-0.67844	0.88571	-0.035389	-0.75585	-0.43071	0.045504	-0.32155	0.11409	0
								Daspletosaurus	Tyrannosauridae	MOR 590	Smith et al., 2005	661	1.6196	0.49989	-0.044632	0.8972	-0.30329	0.30607	0.82306	-0.69798	-0.067955	-0.19832	0.13593	-0.15111	-0.14337	0
								Daspletosaurus	Tyrannosauridae	MOR 590	Smith et al., 2005	662	1.1416	0.20772	-0.27885	-0.31483	-1.0064	0.033413	0.5971	-0.095023	0.56521	0.14599	0.066295	-0.027472	-0.068352	0
								Daspletosaurus	Tyrannosauridae	MOR 590	Smith et al., 2005	663	1.1599	0.18149	-0.26387	0.90516	-0.62796	0.14348	-0.25614	-0.86891	0.075084	0.017563	0.045922	0.26494	-0.22147	0
								Daspletosaurus	Tyrannosauridae	TMP 1997.12.223	Young et al., 2019 (C.H. pers. measurements)	664	2.7038	0.45042	-0.0055605	-0.59817	1.4204	0.45704	0.21362	-0.11531	0.99746	0.62767	-0.19594	0.65448	-0.057892	0
								Daspletosaurus	Tyrannosauridae	TMP 1997.12.223	Young et al., 2019 (C.H. pers. measurements)	665	2.6683	0.022527	-0.093333	-0.34946	1.0598	0.33716	-0.85912	-1.3302	-0.0037893	0.030757	-0.2355	1.4804	-0.36244	0
								Daspletosaurus	Tyrannosauridae	TMP 1997.12.223	Young et al., 2019 (C.H. pers. measurements)	666	2.096	0.13978	0.084275	0.095651	1.1071	0.09647	-0.85494	-0.99399	-0.46781	0.077673	0.15932	0.22505	-0.21854	0
								Albertosaurus	Tyrannosauridae	DMNH 22019	Hendrickx et al., 2015	667	1.325	0.19939	-0.38838	-0.14756	-0.65384	-0.50972	0.40037	-0.19979	0.37232	0.19707	0.070127	0.061651	-0.04381	0
								Albertosaurus	Tyrannosauridae	TMP 81.10.01	Young et al., 2019 (C.H. pers. measurements)	668	2.1805	0.80496	-0.19129	-1.4267	0.91289	0.72165	0.13249	-0.15102	0.48	0.26912	-0.059456	1.1154	-0.34515	0
								Albertosaurus	Tyrannosauridae	TMP 81.10.01	Young et al., 2019 (C.H. pers. measurements)	669	1.9357	0.38161	-0.093101	-0.64972	0.58142	0.41352	-0.37281	-1.1155	0.066111	0.0076071	-0.10917	1.3212	-0.39858	0
								Albertosaurus	Tyrannosauridae	TMP 81.10.01	Young et al., 2019 (C.H. pers. measurements)	670	2.3399	0.39804	-0.076147	-0.91732	1.1408	0.30805	0.3771	0.11618	1.1499	0.65764	-0.36031	1.7415	-0.26357	0
								Albertosaurus	Tyrannosauridae	TMP 81.10.01	Young et al., 2019 (C.H. pers. measurements)	671	2.61	0.49993	-0.083167	-0.96954	0.97676	0.70262	0.19575	-0.91637	0.44183	0.23443	-0.055904	1.2834	-0.38698	0
								Albertosaurus	Tyrannosauridae	TMP 81.10.01	Young et al., 2019 (C.H. pers. measurements)	672	2.5212	0.46761	-0.14643	-1.3148	0.84427	0.66732	0.034222	-0.62347	0.67747	0.44698	0.05865	0.55554	-0.21465	0
								Albertosaurus	Tyrannosauridae	TMP 81.10.01	Young et al., 2019 (C.H. pers. measurements)	673	2.0641	0.85466	-0.093305	-1.0642	0.83938	0.57365	0.1006	-0.086775	0.38191	0.2176	0.037848	0.069847	-0.094187	0
								Albertosaurus	Tyrannosauridae	TMP 81.10.01	Young et al., 2019 (C.H. pers. measurements)	674	2.3122	0.49193	-0.18513	-1.5079	0.87996	0.086646	-0.67549	0.75575	0.85809	-0.020196	-0.68941	-0.61171	0.56747	0
								Albertosaurus	Tyrannosauridae	TMP 81.10.01	Young et al., 2019 (C.H. pers. measurements)	675	2.4451	0.62066	-0.21762	-0.3283	0.6991	0.74621	-0.78932	-1.5055	-0.0892	-0.16505	-0.14848	1.1614	-0.40078	0
								Albertosaurus	Tyrannosauridae	TMP 81.10.01	Young et al., 2019 (C.H. pers. measurements)	676	1.6861	0.12924	0.08762	0.21179	0.79856	-0.027418	-0.54434	-0.8713	0.14543	0.32387	-0.008236	0.59229	-0.19098	0
								Albertosaurus	Tyrannosauridae	TMP 99.50.40	Young et al., 2019 (C.H. pers. measurements)	677	0.40484	0.60744	0.23122	0.37484	0.35326	-0.025315	-0.60494	-0.775	-0.62851	0.12545	0.62584	-1.5028	8.7173e-06	0
								Tyrannosaurus	Tyrannosauridae	FMNH PR2081 "Sue"	Smith, 2005	678	2.4792	0.79133	0.56728	2.4183	1.1513	0.12997	1.4474	-0.06983	-0.054893	-0.89035	-0.52685	-2.677	0.98639	0
								Tyrannosaurus	Tyrannosauridae	FMNH PR2081 "Sue"	Smith, 2005	679	3.3893	0.87968	-0.33252	0.61104	-0.29924	-0.28898	0.75314	1.2413	-0.45301	-0.62166	-0.19479	-0.53965	0.15606	0
								Tyrannosaurus	Tyrannosauridae	FMNH PR2081 "Sue"	Smith, 2005	680	3.0223	0.70197	-0.35085	0.74689	-0.31808	-0.29098	0.43245	0.97997	-0.45952	-0.33945	0.0080437	-0.36266	-0.005022	0
								Tyrannosaurus	Tyrannosauridae	FMNH PR2081 "Sue"	Smith, 2005	681	2.9862	0.70658	-0.33061	0.69678	-0.10814	-0.35831	0.3393	1.2251	-0.73034	-0.43795	-0.0005393	-0.2321	-0.044397	0
								Tyrannosaurus	Tyrannosauridae	FMNH PR2081 "Sue"	Smith, 2005	682	3.3804	1.163	-0.37477	0.90081	-0.26911	-0.050292	0.80629	1.0585	-0.61664	-0.59005	-0.031329	-0.32573	-0.043108	0
								Tyrannosaurus	Tyrannosauridae	FMNH PR2081 "Sue"	Smith, 2005	683	3.6001	0.75622	-0.24617	0.86842	-0.39394	-0.23879	1.0262	0.73168	-0.23146	-0.52341	-0.12344	-0.79522	0.2093	0
								Tyrannosaurus	Tyrannosauridae	FMNH PR2081 "Sue"	Smith, 2005	684	3.5396	0.91591	-0.17492	0.62887	-0.1468	-0.21521	1.2158	1.0795	-0.42795	-0.86832	-0.33492	-0.78288	0.31209	0
								Tyrannosaurus	Tyrannosauridae	FMNH PR2081 "Sue"	Smith, 2005	685	2.7605	0.85988	-0.42257	0.86766	-0.058756	-0.3094	0.0095935	1.4219	-0.80719	-0.28559	0.10524	-0.16554	-0.14782	0
								Tyrannosaurus	Tyrannosauridae	FMNH PR2081 "Sue"	Smith, 2005	686	2.1964	0.33855	-0.4341	1.234	-0.58058	-0.16606	-0.47537	-0.072632	-0.212	0.076928	0.14743	0.032586	-0.21635	0
								Tyrannosaurus	Tyrannosauridae	FMNH PR2081 "Sue"	Smith, 2005	687	1.3773	0.56805	-0.23068	1.5328	0.37521	-0.0074214	-0.76721	0.19952	-1.0243	-0.28227	0.091023	0.31872	-0.32955	0
								Tyrannosaurus	Tyrannosauridae	FMNH PR2081 "Sue"	Smith, 2005	688	2.6189	0.54675	0.82299	2.4033	1.3521	0.12392	2.1284	-0.47189	-0.10524	-0.87115	-0.34781	-2.8616	0.98551	0
								Tyrannosaurus	Tyrannosauridae	FMNH PR2081 "Sue"	Smith, 2005	689	2.2784	0.6741	-0.25115	1.511	0.33501	-0.11523	-0.36652	0.44608	-1.2021	-0.47462	0.081317	0.26709	-0.30644	0
								Tyrannosaurus	Tyrannosauridae	FMNH PR2081 "Sue"	Smith, 2005	690	3.6841	1.4121	-0.80668	1.2351	-0.9362	0.064442	0.040902	0.86917	-0.49589	-0.32688	0.083285	0.23163	-0.3374	0
								Tyrannosaurus	Tyrannosauridae	FMNH PR2081 "Sue"	Smith, 2005	691	3.678	0.98508	-0.58264	1.3888	-0.77684	-0.024761	0.21828	0.26128	-0.46159	-0.3669	0.060508	0.069068	-0.23684	0
								Tyrannosaurus	Tyrannosauridae	FMNH PR2081 "Sue"	Smith, 2005	692	3.1551	0.24615	-0.31695	0.83058	-0.52801	-0.39141	0.33024	0.24604	-0.41024	-0.22385	0.10092	-0.094238	-0.10854	0
								Tyrannosaurus	Tyrannosauridae	FMNH PR2081 "Sue"	Smith, 2005	693	2.7532	0.95966	-0.28719	1.0947	-0.066748	-0.062112	0.47816	0.87111	-0.55831	-0.37885	0.044253	-0.45293	-0.03499	0
								Tyrannosaurus	Tyrannosauridae	FMNH PR2081 "Sue"	Smith, 2005	694	2.8706	0.47327	-0.34386	1.2827	-0.40088	-0.15532	0.02967	-0.039593	-0.54241	-0.28697	0.080952	0.074026	-0.20369	0
								Tyrannosaurus	Tyrannosauridae	FMNH PR2081 "Sue"	Young et al., 2019 (C.H. pers. measurements)	695	1.5806	0.34891	1.1524	1.7143	3.4004	-0.077117	2.4463	0.84032	2.7698	0.73711	-1.5775	0.43111	0.99191	0
								Tyrannosaurus	Tyrannosauridae	FMNH PR2081 "Sue"	Young et al., 2019 (C.H. pers. measurements)	696	3.1649	0.38666	0.33477	-0.18597	2.8357	0.10352	1.1644	1.3285	1.7335	0.64242	-1.0996	1.6453	0.27727	0
								Tyrannosaurus	Tyrannosauridae	FMNH PR2081 "Sue"	Young et al., 2019 (C.H. pers. measurements)	697	1.6514	1.6471	-0.75367	-2.0587	-0.40874	0.90667	-0.61912	0.22462	-0.17419	-0.11288	0.16966	1.2423	-0.66324	0
								Tyrannosaurus	Tyrannosauridae	FMNH PR2081 "Sue"	Young et al., 2019 (C.H. pers. measurements)	698	1.8242	-0.12389	-0.13131	0.76011	0.65951	-0.43203	-1.5438	-0.69988	0.17492	0.35891	-0.37345	1.5311	-0.27015	0
								Tyrannosaurus	Tyrannosauridae	FMNH PR2081 "Sue"	Young et al., 2019 (C.H. pers. measurements)	699	-0.38766	0.46212	-0.096744	-2.021	-1.197	-0.51953	-0.56882	0.41728	0.78341	-0.54488	-0.73936	-1.3617	0.8089	0
								Tyrannosaurus	Tyrannosauridae	MOR 1125 "B-rex"	Smith, 2005	700	2.6135	0.52238	-0.41407	0.67455	-0.39846	-0.30353	0.022841	0.77131	-0.54635	-0.1833	0.11769	0.076608	-0.19953	0
								Tyrannosaurus	Tyrannosauridae	MOR 555 "Devil Rex"	Smith, 2005	701	3.4547	-0.39178	-0.36883	1.0607	-0.5523	-0.88587	-0.43256	0.19051	-0.53471	0.030368	0.18413	-0.032486	-0.12685	0
								Tyrannosaurus	Tyrannosauridae	MOR 555 "Devil Rex"	Smith, 2005	702	2.9459	0.13627	-0.41773	0.74636	-0.49769	-0.50374	-0.22058	0.38618	-0.68726	-0.22743	0.099715	0.37511	-0.26097	0
								Tyrannosaurus	Tyrannosauridae	MOR 555 "Devil Rex"	Smith, 2005	703	3.0684	0.19575	-0.34539	1.7729	-0.086785	-0.3744	-0.75681	-0.24366	-1.1101	-0.54876	-0.072937	0.49775	-0.27238	0
								Tyrannosaurus	Tyrannosauridae	MOR 008	Smith, 2005	704	3.5723	0.79512	-0.45504	1.3943	-0.81524	0.033882	0.48829	-0.24026	-0.27484	-0.35141	0.06139	-0.038831	-0.18241	0
								Tyrannosaurus	Tyrannosauridae	MOR 008	Smith, 2005	705	3.3805	0.13821	-0.17764	1.5207	-0.28008	-0.31721	0.28831	-0.44312	-0.61378	-0.36264	0.091429	-0.12445	-0.11604	0
								Tyrannosaurus	Tyrannosauridae	MOR 008	Smith, 2005	706	3.1186	0.50478	-0.32349	1.1683	-0.48562	-0.099924	0.32906	-0.19793	-0.57322	-0.43533	0.04523	0.20019	-0.22329	0
								Tyrannosaurus	Tyrannosauridae	MOR 008	Smith, 2005	707	2.9724	-0.10669	-0.31792	1.607	-0.91627	-0.27947	-0.10372	-1.0155	0.23421	0.16011	0.13374	-0.40487	-0.027631	0
								Tyrannosaurus	Tyrannosauridae	MOR 008	Smith, 2005	708	2.5506	0.78969	-0.50464	1.3797	-0.68518	0.15203	-0.22493	-0.31159	-0.36449	-0.32284	-0.020887	0.36111	-0.28889	0
								Tyrannosaurus	Tyrannosauridae	BHI 3033 "Stan"	Smith, 2005	709	1.4645	-0.17592	1.1763	2.4434	1.9002	-0.15229	1.406	-0.82155	0.20744	-1.2544	-1.1009	-3.4839	1.6435	0
								Tyrannosaurus	Tyrannosauridae	BHI 3033 "Stan"	Smith, 2005	710	2.5221	-0.34573	0.95042	2.8094	1.6506	-0.25813	1.5649	-1.1546	-0.71988	-0.32695	0.29665	-2.261	0.50239	0
								Tyrannosaurus	Tyrannosauridae	BHI 3033 "Stan"	Smith, 2005	711	1.9562	0.16465	0.90396	2.7351	1.5443	-0.027651	1.4087	-0.69998	0.10677	-0.72001	-0.50231	-3.1917	1.1906	0
								Tyrannosaurus	Tyrannosauridae	BHI 3033 "Stan"	Smith, 2005	712	2.028	0.069617	0.90052	2.7246	1.4776	0.11443	1.8013	-1.2093	-0.37304	-0.25553	0.29394	-2.3659	0.5034	0
								Tyrannosaurus	Tyrannosauridae	BHI 3033 "Stan"	Smith, 2005	713	3.6052	0.49828	-0.29434	1.2271	-0.49656	-0.23907	0.62697	0.073785	-0.42146	-0.33457	0.10116	-0.30025	-0.075104	0
								Tyrannosaurus	Tyrannosauridae	BHI 3033 "Stan"	Smith, 2005	714	3.7413	0.76358	-0.52705	0.8731	-0.88342	-0.15987	0.54645	0.34393	-0.38584	-0.38069	0.05954	0.10959	-0.20258	0
								Tyrannosaurus	Tyrannosauridae	BHI 3033 "Stan"	Smith, 2005	715	3.5879	0.35717	-0.16254	0.24709	-0.40496	-0.33134	1.3008	0.37084	-0.71578	-0.65775	0.051038	0.14133	-0.13826	0
								Tyrannosaurus	Tyrannosauridae	BHI 3033 "Stan"	Smith, 2005	716	3.4642	0.42989	-0.46527	0.16297	-0.9927	-0.34008	0.73618	0.49084	-0.23604	-0.33473	0.031622	0.17804	-0.14736	0
								Tyrannosaurus	Tyrannosauridae	BHI 3033 "Stan"	Smith, 2005	717	3.4976	0.83118	-0.5512	0.89124	-1.0288	-0.019546	0.55292	0.13324	-0.16291	-0.29132	0.065098	0.079635	-0.20419	0
								Tyrannosaurus	Tyrannosauridae	BHI 3033 "Stan"	Smith, 2005	718	2.7378	2.7843	-0.76161	1.4336	-0.75087	1.1185	0.96446	0.92644	-0.18249	-0.55264	0.02037	-0.14023	-0.31459	0
								Tyrannosaurus	Tyrannosauridae	BHI 3033 "Stan"	Smith, 2005	719	2.242	0.31116	-0.38267	0.93392	-0.3637	-0.39116	-0.29603	0.6854	-0.26352	0.17691	0.22266	-0.33056	-0.10972	0
								Tyrannosaurus	Tyrannosauridae	BHI 3033 "Stan"	Smith, 2005	720	2.7419	0.33535	-0.3973	1.4261	-0.45867	-0.15887	-0.43991	-0.39504	-0.64934	-0.39299	-0.040996	0.44971	-0.26922	0
								Tyrannosaurus	Tyrannosauridae	BHI 3033 "Stan"	Smith, 2005	721	1.8856	-0.48559	-0.323	1.8349	-0.44795	-0.37837	-1.6094	-1.3611	-0.42552	-0.21552	-0.23927	0.56244	-0.1631	0
								Tyrannosaurus	Tyrannosauridae	BHI 3033 "Stan"	Smith, 2005	722	3.1067	0.62757	-0.65159	1.0081	-0.82081	-0.19342	-0.44073	0.23645	-0.63756	-0.36444	-0.013254	0.69448	-0.37204	0
								Tyrannosaurus	Tyrannosauridae	BHI 3033 "Stan"	Smith, 2005	723	2.1395	0.85212	-0.42353	1.5767	-0.42788	0.2633	-0.32489	-0.39795	-0.44757	-0.34824	-0.031171	0.30902	-0.28443	0
								Tyrannosaurus	Tyrannosauridae	BHI 3033 "Stan"	Smith, 2005	724	3.1467	0.92503	-0.51465	1.0372	-0.42759	-0.1109	0.084041	0.70533	-0.78836	-0.4316	0.070297	0.29006	-0.30007	0
								Tyrannosaurus	Tyrannosauridae	BHI 3033 "Stan"	Smith, 2005	725	3.534	0.93935	-0.42673	1.1362	-0.67735	0.097116	0.70783	-0.033627	-0.53045	-0.55742	0.034112	0.21015	-0.25458	0
								Tyrannosaurus	Tyrannosauridae	BHI 3033 "Stan"	Smith, 2005	726	3.5914	0.75557	-0.46301	1.2005	-0.62908	-0.076193	0.32494	0.029449	-0.68494	-0.55622	0.0069728	0.35022	-0.27681	0
								Tyrannosaurus	Tyrannosauridae	BHI 3033 "Stan"	Smith, 2005	727	3.164	0.94444	-0.52468	1.874	-0.39103	-0.00030359	-0.3415	0.15714	-0.67816	-0.32865	0.061364	0.061017	-0.26103	0
								Tyrannosaurus	Tyrannosauridae	BHI 3033 "Stan"	Smith, 2005	728	2.9041	0.70537	-0.56339	1.9024	-0.35907	-0.11175	-0.91665	0.0034639	-0.83952	-0.38028	-0.03775	0.42037	-0.31897	0
								Tyrannosaurus	Tyrannosauridae	BHI 3033 "Stan"	Smith, 2005	729	2.604	0.76004	-0.53181	1.8391	-0.35587	-0.04713	-0.7635	0.10015	-0.62597	-0.16824	0.078795	0.15367	-0.28976	0
								Tyrannosaurus	Tyrannosauridae	BHI 3033 "Stan"	Smith, 2005	730	2.4969	0.42857	-0.44067	2.0288	-0.17279	-0.21809	-1.0328	-0.074678	-0.70373	-0.1	0.091995	0.076401	-0.25058	0
								Tyrannosaurus	Tyrannosauridae	BHI 3033 "Stan"	Smith, 2005	731	0.96333	0.24292	-0.69033	2.3953	-0.14697	-0.17542	-3.1663	-0.44656	-0.81158	-0.22866	-0.40985	0.91814	-0.30704	0
								Tyrannosaurus	Tyrannosauridae	BHI 3033 "Stan"	Smith, 2005	732	3.6309	1.03	-0.70384	1.8481	-0.99933	0.13491	-0.3121	-0.35047	-0.37245	-0.44725	-0.099616	0.33772	-0.27778	0
								Tyrannosaurus	Tyrannosauridae	BHI 3033 "Stan"	Smith, 2005	733	2.9843	0.34492	-0.36614	1.8917	-0.16788	-0.26645	-0.65728	-0.23457	-0.87249	-0.38211	0.00064981	0.22454	-0.23514	0
								Tyrannosaurus	Tyrannosauridae	BHI 3033 "Stan"	Smith, 2005	734	2.0803	0.5668	-0.613	2.4044	-0.31039	-0.082917	-1.8024	-0.2621	-0.59041	-0.035258	-0.028437	0.24888	-0.2866	0
								Tyrannosaurus	Tyrannosauridae	BHI 3033 "Stan"	Smith, 2005	735	1.6118	-0.03166	-0.47566	2.6689	-0.035246	-0.36298	-2.4144	-0.56138	-0.61883	0.16066	-0.017521	0.11624	-0.2104	0
								Tyrannosaurus	Tyrannosauridae	AMNH 5027	Smith, 2005	736	1.8394	0.056507	0.89446	2.8314	1.7552	-0.23842	0.73421	-0.3971	0.056033	-1.0844	-1.008	-3.3468	1.5072	0
								Tyrannosaurus	Tyrannosauridae	AMNH 5027	Smith, 2005	737	2.2119	0.32058	0.47428	2.3688	1.1678	-0.44603	-0.45882	0.30372	0.45045	-2.1362	-2.417	-3.204	2.181	0
								Tyrannosaurus	Tyrannosauridae	AMNH 5027	Smith, 2005	738	1.8351	0.72981	0.56809	2.5894	1.1633	0.018667	0.081834	-0.10088	0.78743	-2.1186	-2.3874	-3.5324	2.2307	0
								Tyrannosaurus	Tyrannosauridae	AMNH 5027	Smith, 2005	739	2.2625	0.057273	0.74158	2.5288	1.323	-0.15389	1.2964	-0.59341	-0.21232	-0.44848	-0.11135	-2.558	0.79005	0
								Tyrannosaurus	Tyrannosauridae	AMNH 5027	Smith, 2005	740	3.1969	0.41305	-0.056232	0.97361	0.0094432	-0.3216	0.91151	0.44817	-0.55969	-0.49427	0.0043177	-0.62461	0.10686	0
								Tyrannosaurus	Tyrannosauridae	AMNH 5027	Smith, 2005	741	3.1617	0.53929	-0.04213	0.28323	-0.22266	-0.15635	1.5736	0.42379	-0.49129	-0.66109	-0.011399	-0.3027	0.02806	0
								Tyrannosaurus	Tyrannosauridae	AMNH 5027	Smith, 2005	742	3.5437	0.75774	-0.42739	0.58702	-0.73639	-0.078438	0.82293	0.25862	-0.60016	-0.58632	0.031996	0.4049	-0.27664	0
								Tyrannosaurus	Tyrannosauridae	AMNH 5027	Smith, 2005	743	2.724	0.92526	-0.45855	0.33555	-0.80033	-0.046001	0.69821	0.87845	0.086095	-0.26514	-0.076433	-0.39313	0.047553	0
								Tyrannosaurus	Tyrannosauridae	AMNH 5027	Smith, 2005	744	2.9292	0.80424	-0.50043	0.66361	-0.99688	0.057204	0.58668	0.1293	-0.015191	-0.20272	0.074381	0.046702	-0.18794	0
								Tyrannosaurus	Tyrannosauridae	AMNH 5027	Smith, 2005	745	2.9355	0.45872	-0.21515	0.67184	-0.514	-0.075937	0.88978	-0.098662	-0.39202	-0.40406	0.090048	0.052385	-0.165	0
								Tyrannosaurus	Tyrannosauridae	AMNH 5027	Smith, 2005	746	2.0102	0.58178	-0.52743	1.4357	-0.30188	-0.19064	-0.91438	0.52138	-0.53365	0.15685	0.24613	0.089291	-0.32232	0
								Tyrannosaurus	Tyrannosauridae	AMNH 5027	Smith, 2005	747	3.6223	0.30537	-0.35585	0.51161	-0.75249	-0.4928	0.69729	0.58816	-0.16145	-0.2839	-0.0082583	-0.39399	0.06775	0
								Tyrannosaurus	Tyrannosauridae	SDSM 12047	Smith, 2005	748	3.6556	1.0604	-0.50166	1.1386	-0.84404	0.12389	0.7483	0.084375	-0.34692	-0.46379	0.051034	0.059852	-0.2212	0
								Tyrannosaurus	Tyrannosauridae	SDSM 12047	Smith, 2005	749	2.8752	1.0147	-0.20377	0.93041	-0.28862	0.12741	1.1233	0.4476	-0.23676	-0.45697	0.00085039	-0.60194	0.04581	0
								Tyrannosaurus	Tyrannosauridae	SDSM 12047	Smith, 2005	750	3.4444	0.53331	-0.15262	0.20819	-0.50698	-0.16162	1.5672	0.30942	-0.45657	-0.60826	0.050529	-0.064686	-0.08059	0
								Tyrannosaurus	Tyrannosauridae	SDSM 12047	Smith, 2005	751	3.5188	0.81481	-0.21289	0.84317	-0.47425	-0.06116	1.3157	0.38631	-0.20402	-0.49234	-0.007511	-0.6373	0.090797	0
								Tyrannosaurus	Tyrannosauridae	SDSM 12047	Smith, 2005	752	3.079	0.64312	-0.45873	0.041503	-0.76526	-0.44687	0.46524	1.3795	0.093797	-0.51006	-0.42655	-0.61332	0.34743	0
								Tyrannosaurus	Tyrannosauridae	SDSM 12047	Smith, 2005	753	3.0003	0.63881	-0.38658	0.023091	-0.79172	-0.26528	0.85379	0.92421	0.010105	-0.4231	-0.1827	-0.34614	0.13075	0
								Tyrannosaurus	Tyrannosauridae	SDSM 12047	Smith, 2005	754	2.3669	1.0536	-0.5159	1.1508	-0.33355	0.020694	-0.14883	0.85754	-0.51796	-0.11187	0.17137	-0.037249	-0.26268	0
								Tyrannosaurus	Tyrannosauridae	SDSM 12047	Smith, 2005	755	3.361	0.046707	-0.42469	0.49216	-1.644	-0.35758	0.85984	-0.29273	1.1638	0.29938	0.0068276	-1.0823	0.32195	0
								Tyrannosaurus	Tyrannosauridae	SDSM 12047	Smith, 2005	756	1.258	1.3141	-0.67995	0.93038	-0.44556	0.16722	-0.58538	1.4169	-0.14075	0.43563	0.38341	-0.19522	-0.34046	0
								Tyrannosaurus	Tyrannosauridae	SDSM 12047	Smith, 2005	757	3.1988	0.10084	-0.3251	0.50568	-1.5871	-0.22987	1.1495	-0.47205	1.3112	0.25873	-0.030371	-1.2891	0.40749	0
								Tyrannosaurus	Tyrannosauridae	SDSM 12047	Smith, 2005	758	3.142	0.80043	-0.28201	0.39708	-0.54977	0.027014	1.1968	0.29944	-0.51825	-0.58883	0.052257	0.19468	-0.20971	0
								Tyrannosaurus	Tyrannosauridae	SDSM 12047	Smith, 2005	759	2.9868	1.096	-0.39547	0.71883	-0.51738	0.0045033	0.79098	0.9251	-0.15998	-0.40398	-0.070922	-0.52896	0.059923	0
								Tyrannosaurus	Tyrannosauridae	SDSM 12047	Smith, 2005	760	3.0996	0.44966	-0.32748	0.87973	-0.34907	-0.30539	0.29109	0.41528	-0.67819	-0.37436	0.08179	0.092355	-0.18517	0
								Tyrannosaurus	Tyrannosauridae	SDSM 12047	Smith, 2005	761	2.7126	1.0021	-0.33306	1.0642	-0.33807	0.053781	0.58547	0.61733	-0.26356	-0.27717	0.057008	-0.49672	-0.028879	0
								Tyrannosaurus	Tyrannosauridae	SDSM 12047	Smith, 2005	762	2.3239	0.91042	-0.40326	0.86218	-0.31645	-0.047173	0.18867	0.89406	-0.34571	-0.14925	0.10176	-0.2854	-0.11168	0
								Tyrannosaurus	Tyrannosauridae	SDSM 12047	Smith, 2005	763	3.3028	0.89323	-0.4042	0.45062	-0.73464	-0.094955	0.98201	0.74873	-0.14612	-0.43333	-0.052066	-0.31754	0.011601	0
								Tyrannosaurus	Tyrannosauridae	CM 9380	Hendrickx et al., 2015	764	3.2341	0.22237	0.21139	0.096342	2.7458	-0.46729	-0.65767	1.9668	3.2364	-1.2185	-4.2144	0.99514	2.1847	0
								Tyrannosaurus	Tyrannosauridae	CM 9380	Hendrickx et al., 2015	765	3.5919	0.92736	-0.21708	0.092402	2.0355	0.5868	0.17551	0.80692	1.5696	0.92432	-0.60913	1.6014	-0.11504	0
								Tyrannosaurus	Tyrannosauridae	CM 9380	Hendrickx et al., 2015	766	3.3614	0.70373	-0.10775	0.085623	2.4196	0.33429	-0.23887	1.062	0.9541	0.75914	-0.53158	1.369	-0.089312	0
								Tyrannosaurus	Tyrannosauridae	CM 9380	Hendrickx et al., 2015	767	3.1239	0.80783	-0.1305	0.61012	1.8358	0.60955	-0.43546	-0.22223	0.64968	0.52174	-0.33931	1.2687	-0.24915	0
								Tyrannosaurus	Tyrannosauridae	CM 9380	Hendrickx et al., 2015	768	1.8086	0.65223	-0.26926	2.1661	0.87057	-0.30107	-2.1129	-0.24095	-0.069852	0.39697	-0.32859	1.0361	-0.2547	0
								Tyrannosaurus	Tyrannosauridae	CM 9380	Hendrickx et al., 2015	769	1.2973	0.063569	0.34912	2.4925	1.2147	-0.38033	0.80347	-0.3105	3.1347	1.7613	-0.97721	2.1563	0.094453	0
								Tyrannosaurus	Tyrannosauridae	CM 9380	Hendrickx et al., 2015	770	3.6189	0.38311	0.1905	0.29749	2.932	0.024883	0.22143	1.5317	2.417	0.44564	-1.8638	0.81637	0.93526	0
								Tyrannosaurus	Tyrannosauridae	CM 9380	Hendrickx et al., 2015	771	3.8903	0.47366	0.051139	1.085	2.4153	0.55692	-0.11597	-0.53013	0.85893	0.60382	-0.50216	1.5822	-0.20047	0
								Tyrannosaurus	Tyrannosauridae	CM 9380	Hendrickx et al., 2015	772	3.2929	0.30877	-0.031008	0.50964	2.293	0.084024	-0.55731	0.6083	0.88446	0.90883	-0.37418	1.0126	-0.049455	0
								Tyrannosaurus	Tyrannosauridae	CM 9380	Pers. obs.	773	3.2047	0.34176	-0.13646	0.44922	1.4335	0.55181	-0.77162	-1.1303	0.57741	0.4194	-0.29182	1.1842	-0.24583	0
								Tyrannosaurus	Tyrannosauridae	CM 9380	Hendrickx et al., 2015	774	2.5694	0.87315	-0.25141	0.91248	1.4422	0.30945	-1.1087	0.20088	0.44774	0.80357	0.008448	0.40727	-0.20485	0
								Tyrannosaurus	Tyrannosauridae	CM 9380	Smith, 2005	775	3.6779	-1.4278	0.065552	0.84843	-0.24566	-1.263	0.013447	-0.76723	-0.78588	-0.21395	0.13294	0.099772	-0.037161	0
								Tyrannosaurus	Tyrannosauridae	CM 9380	Smith, 2005	776	3.9017	-0.45401	-0.38582	1.3213	-1.0112	-0.89703	-0.095755	-0.10607	0.28188	0.39031	0.22469	-0.90781	0.15415	0
								Tyrannosaurus	Tyrannosauridae	CM 9380	Smith, 2005	777	3.9068	-0.10842	-0.30902	1.6065	-0.25145	-0.72999	-0.30908	0.015578	-0.92896	-0.32314	0.10021	0.022253	-0.15157	0
								Tyrannosaurus	Tyrannosauridae	CM 9380	Smith, 2005	778	3.4221	0.43391	-0.43139	1.6757	-0.45908	-0.37009	-0.20111	0.22847	-0.44721	-0.051467	0.17989	-0.35162	-0.11919	0
								Tyrannosaurus	Tyrannosauridae	CM 9380	Smith, 2005	779	1.8768	0.035117	-0.106	1.7447	0.49461	-0.38817	-0.82023	0.045288	-1.0739	-0.17459	0.15551	0.021942	-0.21741	0
								Tyrannosaurus	Tyrannosauridae	CM 9380	Smith, 2005	780	2.1936	0.5405	-0.45884	2.0005	0.08393	-0.28528	-1.2035	0.52932	-0.86666	0.10317	0.2687	-0.038557	-0.31329	0
								Tyrannosaurus	Tyrannosauridae	CM 9380	Smith, 2005	781	3.783	0.51315	-0.3294	1.3755	-0.5548	-0.24231	0.56136	-0.0033776	-0.41709	-0.32598	0.10518	-0.30263	-0.084087	0
								Tyrannosaurus	Tyrannosauridae	CM 9380	Smith, 2005	782	3.8451	-0.002708	-0.16855	1.2926	-0.25577	-0.57316	0.44708	-0.04721	-0.72129	-0.38391	0.11267	-0.22623	-0.062811	0
								Tyrannosaurus	Tyrannosauridae	CM 9380	Smith, 2005	783	3.4325	0.022589	-0.22548	1.4602	0.14948	-0.64253	-0.3378	0.25639	-1.3313	-0.53973	0.060507	0.30768	-0.2386	0
								Tyrannosaurus	Tyrannosauridae	CM 9380	Smith, 2005	784	2.753	-0.45551	0.064783	1.1425	0.8302	-1.136	-0.3921	1.2258	-1.2422	-0.24476	0.096625	-0.67665	0.14059	0
								Tyrannosaurus	Tyrannosauridae	BMNH R7994	Hendrickx et al., 2015	785	3.1932	-0.52114	-0.0016686	-0.32784	2.486	-0.84329	-1.2734	1.6638	0.20806	0.87919	-0.33116	1.0578	0.005031	0
								Tyrannosaurus	Tyrannosauridae	BMNH R7994	Hendrickx et al., 2015	786	3.2172	1.0645	-0.51856	0.63932	1.4514	0.66263	-1.1455	0.47576	1.407	1.3698	-0.034433	0.33252	-0.13756	0
								Tyrannosaurus	Tyrannosauridae	BMNH R7994	Hendrickx et al., 2015	787	3.3007	-0.34707	0.17099	0.50056	2.9491	-0.4457	-1.2098	0.57502	-0.53583	0.34979	-0.36546	1.78	-0.28297	0
								Tyrannosaurus	Tyrannosauridae	BMNH R7994	Hendrickx et al., 2015	788	1.9519	0.9058	-0.28581	1.2674	1.3369	-0.083014	-1.597	0.88261	0.076534	1.1434	0.42706	-0.19222	-0.25975	0
								Tyrannosaurus	Tyrannosauridae	BMNH R7994	Hendrickx et al., 2015	789	0.77632	1.3996	-0.54323	2.0398	1.0099	-0.74668	-1.9556	3.0534	0.27908	2.531	1.2715	-0.58381	-0.56991	0
								Tyrannosaurus	Tyrannosauridae	BMNH R7994	Smith, 2005	790	3.1141	0.98769	-0.40491	0.98048	-0.27541	-0.14377	0.43032	1.0358	-0.56544	-0.38091	0.042537	-0.32296	-0.073765	0
								Tyrannosaurus	Tyrannosauridae	BMNH R7994	Smith, 2005	791	3.2199	1.058	-0.3765	1.8565	0.08397	-0.27787	-0.011164	1.3665	-0.46747	-0.10468	0.10384	-1.2087	0.15222	0
								Tyrannosaurus	Tyrannosauridae	BMNH R7994	Smith, 2005	792	2.8082	0.84145	-0.32262	1.9592	-0.11926	-0.024946	-0.018524	0.25247	-0.40915	-0.065863	0.19459	-0.66125	-0.074217	0
								Tyrannosaurus	Tyrannosauridae	BMNH R7994	Smith, 2005	793	2.5159	0.61334	-0.51051	1.8603	-0.42325	-0.20564	-0.67718	0.3859	-0.19573	0.35044	0.3249	-0.5385	-0.16365	0
								Tyrannosaurus	Tyrannosauridae	BMNH R7994	Smith, 2005	794	1.8874	0.47397	-0.56966	1.9147	-0.44821	-0.17322	-1.2851	0.14029	-0.20468	0.44989	0.30263	-0.2017	-0.26692	0
								Tyrannosaurus	Tyrannosauridae	BMNH R7994	Smith, 2005	795	1.0714	0.45245	-0.53254	1.2928	0.16109	-0.33762	-1.6601	1.074	-0.99448	0.32104	0.38308	0.4577	-0.5122	0
								Tyrannosaurus	Tyrannosauridae	LACM 150167	Smith, 2005	796	3.1064	0.46279	-0.35583	0.27775	-0.70491	-0.20532	0.75178	0.2819	-0.48097	-0.45485	0.045587	0.36331	-0.23035	0
								Tyrannosaurus	Tyrannosauridae	LACM 150167	Smith, 2005	797	2.8612	0.28058	-0.29743	0.12815	-0.2339	-0.65045	0.26571	1.3778	-0.5505	-0.45149	-0.16269	-0.25252	0.1125	0
								Tyrannosaurus	Tyrannosauridae	LACM 150167	Smith, 2005	798	3.2291	0.56797	-0.41602	0.91764	-0.39687	-0.43687	0.16284	1.0041	-0.44392	-0.17932	0.082819	-0.4105	-0.022764	0
								Tyrannosaurus	Tyrannosauridae	LACM 150167	Smith, 2005	799	1.1856	0.46259	-0.60244	2.6253	0.10834	-0.12609	-2.7019	-0.14034	-0.89201	-0.044312	-0.1256	0.48366	-0.33006	0
								Tyrannosaurus	Tyrannosauridae	LACM 23844	Smith, 2005	800	3.9002	-1.3157	-0.11224	1.2059	-0.18327	-1.5106	-0.59778	0.021027	-0.77992	0.10572	0.2384	-0.32083	0.026159	0
								Tyrannosaurus	Tyrannosauridae	LACM 23844	Smith, 2005	801	3.7253	0.60886	-0.40873	-0.17742	-0.57198	-0.62602	0.7105	1.6707	-0.38342	-0.93641	-0.568	-0.35334	0.35031	0
								Tyrannosaurus	Tyrannosauridae	LACM 23844	Smith, 2005	802	3.6764	0.13852	-0.13493	0.33444	0.13143	-0.76281	0.6685	1.1454	-1.2634	-0.79824	-0.059586	0.11119	-0.056267	0
								Tyrannosaurus	Tyrannosauridae	LACM 23844	Smith, 2005	803	3.3264	-1.1535	-0.078169	0.89998	-0.15869	-1.3366	-0.41449	0.142	-0.6253	0.11563	0.2116	-0.35714	0.04936	0
								Tyrannosaurus	Tyrannosauridae	LACM 23844	Smith, 2005	804	3.8397	-1.4236	-0.024832	0.58415	-0.1475	-1.7728	-0.35483	0.76573	-0.3711	-0.072023	-0.15724	-1.0301	0.51905	0
								Tyrannosaurus	Tyrannosauridae	LACM 23844	Smith, 2005	805	3.5631	0.82422	-0.42734	1.0484	-0.73298	-0.052945	0.71501	0.21527	-0.30623	-0.36014	0.076806	-0.14807	-0.13666	0
								Tyrannosaurus	Tyrannosauridae	LACM 23844	Smith, 2005	806	2.9454	0.82941	-0.49633	1.4937	-0.40048	-0.24288	-0.14934	0.92249	-0.2399	0.13193	0.23205	-0.70789	-0.052525	0
								Tyrannosaurus	Tyrannosauridae	LACM 23844	Smith, 2005	807	3.3668	-1.3681	0.054577	0.17695	-0.24302	-1.4678	0.14721	0.28177	-0.39248	-0.11555	-0.027522	-0.53748	0.294	0
								Tyrannosaurus	Tyrannosauridae	LACM 23844	Smith, 2005	808	1.7642	-0.0029632	-0.38459	2.882	0.52036	-0.70743	-2.1493	0.69449	-0.80003	0.95392	0.72023	-0.81926	-0.27549	0
								Tyrannosaurus	Tyrannosauridae	UCMP 118742	Smith, 2005	809	3.6588	-0.62868	-0.23989	1.2759	-0.67374	-1.0008	-0.098382	-0.013151	0.10324	0.32062	0.19917	-0.98757	0.21181	0
								Tyrannosaurus	Tyrannosauridae	UCMP 118742	Smith, 2005	810	3.391	-0.16411	-0.45783	1.5684	-1.014	-0.5746	-0.36607	-0.39782	0.23423	0.37911	0.23366	-0.58919	-0.0055879	0
								Tyrannosaurus	Tyrannosauridae	UCMP 118742	Smith, 2005	811	3.4132	-0.51732	-0.22267	1.3761	-0.4996	-1.0348	-0.24904	0.39336	0.25282	0.37384	0.10347	-1.4543	0.40619	0
								Tyrannosaurus	Tyrannosauridae	UCMP 118742	Smith, 2005	812	2.3758	-0.5845	-0.20478	0.90827	-0.26957	-0.84125	-0.5519	0.14391	-0.38414	0.24459	0.24302	-0.2215	-0.07482	0
								Tyrannosaurus	Tyrannosauridae	UCMP 118742	Smith, 2005	813	1.3384	-0.23288	-0.13848	1.4908	0.43852	-0.76353	-1.0392	0.98633	-0.41312	0.72735	0.50921	-1.0181	-0.005438	0
								Zhuchengtyrannus	Tyrannosauridae	ZCDM V0031/IVPP FV 1794	Young et al., 2019 (C.H. pers. measurements)	814	2.9557	0.55908	-0.56482	0.7891	-0.018787	0.78393	-0.63271	-1.7304	2.7026	1.0724	-0.8953	2.3316	-0.2203	0
								Zhuchengtyrannus	Tyrannosauridae	ZCDM V0031/IVPP FV 1794	Young et al., 2019 (C.H. pers. measurements)	815	3.0147	1.4283	-0.40393	0.10005	1.3722	1.2199	-0.4588	-0.57661	0.56805	0.09503	-0.50819	2.0038	-0.48028	0
								Zhuchengtyrannus	Tyrannosauridae	ZCDM V0031/IVPP FV 1794	Young et al., 2019 (C.H. pers. measurements)	816	2.8343	1.4326	-0.27421	0.42641	1.7544	0.90634	-0.50113	0.40176	0.71221	0.6703	-0.092581	0.25398	-0.13644	0
								Zhuchengtyrannus	Tyrannosauridae	ZCDM V0031/IVPP FV 1794	Young et al., 2019 (C.H. pers. measurements)	817	3.1565	1.6104	-0.29565	0.58811	1.531	1.352	-0.71579	-0.92756	-0.14751	-0.084361	-0.046209	0.44732	-0.34358	0
								Zhuchengtyrannus	Tyrannosauridae	ZCDM V0031/IVPP FV 1794	Young et al., 2019 (C.H. pers. measurements)	818	2.938	1.3025	-0.32096	0.026325	1.5859	0.92504	-0.76528	0.084336	0.1849	0.43746	0.093241	0.17977	-0.24674	0
								Tyrannosauridae	Tyrannosauridae	BMNH R3683	Young et al., 2019 (C.H. pers. measurements)	819	0.82366	0.88336	0.45282	-0.61568	1.0791	0.32945	1.3601	-0.0032691	0.43	-0.043491	-0.16521	0.027886	0.087701	0
								Falcarius	Therizinosauria	UMNH VP 14545	Young et al., 2019 (C.H. pers. measurements)	820	-3.4455	-0.98014	1.6443	1.3595	1.561	-2.8921	0.0845	1.2493	-3.2514	-1.0692	0.08513	0.49012	-0.070496	0
								Falcarius	Therizinosauria	UMNH VP 14545	Young et al., 2019 (C.H. pers. measurements)	821	-3.3505	-2.1921	1.2323	1.7418	-0.65214	-3.1476	-1.149	-0.89601	-1.2649	0.62052	0.84537	-1.4811	0.20384	0
								Falcarius	Therizinosauria	UMNH VP 14545	Young et al., 2019 (C.H. pers. measurements)	822	-3.7523	-2.0217	1.1263	1.9417	-1.2725	-2.707	-1.3099	-2.1561	-0.9523	0.18757	0.39339	-0.68138	0.14199	0
								Falcarius	Therizinosauria	UMNH VP 14545	Young et al., 2019 (C.H. pers. measurements)	823	-5.3319	2.6039	0.51887	2.1827	-1.4838	-0.70281	1.1016	1.3767	0.077084	-0.0088476	0.05103	-0.45481	-0.048314	0
								Falcarius	Therizinosauria	UMNH VP 14545	Young et al., 2019 (C.H. pers. measurements)	824	-4.497	-2.3061	1.4367	1.6129	-1.1156	-3.1817	0.10868	-1.2729	0.0082676	0.49746	-0.073354	0.59999	0.18658	0
								Falcarius	Therizinosauria	UMNH VP 14545	Young et al., 2019 (C.H. pers. measurements)	825	-4.5125	-1.7499	1.2846	2.2492	-1.1795	-3.048	-0.49656	-1.018	-0.53176	0.52039	0.33002	-0.4829	0.18492	0
								Falcarius	Therizinosauria	UMNH VP 14545	Young et al., 2019 (C.H. pers. measurements)	826	-4.2938	-1.903	1.3698	2.2459	-1.6926	-2.4466	-0.48772	-3.4457	-0.85137	-0.64621	-0.22637	0.27715	0.16161	0
								Falcarius	Therizinosauria	UMNH VP 14528	Young et al., 2019 (C.H. pers. measurements)	827	-3.8808	-0.70015	0.20673	2.1987	-2.6611	-2.5754	-1.6138	-0.37084	0.68812	1.117	0.065195	0.72341	-0.13998	0
								Eshanosaurus	Therizinosauria	IVPP V11579	Young et al., 2019 (C.H. pers. measurements)	828	-5.4138	1.7801	0.80605	2.753	-1.4016	-0.94244	0.83039	0.037165	-0.23382	-0.068822	0.17557	-0.5689	-0.050971	0
								Segnosaurus	Therizinosauria	MPC-D 100/80	Zanno et al., 2016	829	-1.6235	1.8022	0.18792	1.0446	0.65405	1.4679	0.91733	-0.21529	0.25594	-0.093815	0.095738	-0.7731	-0.056863	0
								Segnosaurus	Therizinosauria	MPC-D 100/80	Zanno et al., 2016	830	-1.7558	1.565	0.47421	0.78353	0.64858	1.8206	1.925	-1.5422	0.015909	-0.28375	0.34038	-0.03555	-0.40226	0
								Segnosaurus	Therizinosauria	MPC-D 100/80	Zanno et al., 2016	831	-3.0236	2.09	0.5596	1.3029	1.1205	2.2654	1.6403	-1.4312	0.20303	-0.19247	0.27163	-0.54651	-0.27361	0
								Incisivosaurus	Oviraptorosauria	IVPP V 13326	Young et al., 2019 (C.H. pers. measurements)	832	-4.8057	1.4957	0.80576	0.57603	1.9137	1.4853	1.3256	-1.0282	0.7271	0.083995	-0.039382	-1.4101	0.32825	0
								Incisivosaurus	Oviraptorosauria	IVPP V 13326	Young et al., 2019 (C.H. pers. measurements)	833	-4.0574	3.344	-1.3552	3.6489	-0.32134	2.4261	-5.8066	-2.8902	0.44432	-2.5267	-3.3032	2.3192	0.3641	0
								Bambiraptor	Dromaeosauridae	AMNH 30556	Young et al., 2019 (C.H. pers. measurements)	834	-4.926	1.1478	1.0629	-0.781	-1.959	-1.2128	-0.25262	0.98309	-0.76825	-4.5364	-3.4715	-2.0425	2.3108	0
								Bambiraptor	Dromaeosauridae	AMNH 30556	Young et al., 2019 (C.H. pers. measurements)	835	-4.9926	0.74802	1.191	-0.58171	-1.5502	-1.5208	1.141	1.4101	-2.5294	-1.9383	0.0096477	-0.79252	0.12169	0
								Bambiraptor	Dromaeosauridae	AMNH 30556	Young et al., 2019 (C.H. pers. measurements)	836	-5.0663	0.52788	1.3865	-0.1651	-1.3097	-1.5622	1.6936	1.0434	-2.4107	-1.6905	0.11505	-0.096035	-0.097766	0
								Bambiraptor	Dromaeosauridae	AMNH 30556	Young et al., 2019 (C.H. pers. measurements)	837	-4.9861	0.88408	1.1277	-0.25377	-1.8427	-1.3758	1.7857	1.1964	-1.8148	-1.4529	0.038536	0.2481	-0.17173	0
								Bambiraptor	Dromaeosauridae	AMNH 30556	Young et al., 2019 (C.H. pers. measurements)	838	-4.4323	1.0609	1.0241	-0.034829	-1.6693	-0.88343	1.1277	0.39671	-2.503	-1.5502	0.54103	-0.67968	-0.27966	0
								Bambiraptor	Dromaeosauridae	AMNH 30556	Young et al., 2019 (C.H. pers. measurements)	839	-4.7411	0.33494	1.6405	-0.38056	-0.71762	-1.0823	1.6168	-0.12132	-3.369	-2.0692	0.63426	-1.2865	-0.092278	0
								Bambiraptor	Dromaeosauridae	AMNH 30556	Smith et al., 2005	840	-4.4408	0.55208	0.24638	-2.1357	0.66715	0.41447	-2.6288	0.91597	1.4301	-4.3	-5.352	-0.56791	2.9198	0
								Bambiraptor	Dromaeosauridae	AMNH 30556	Smith et al., 2005	841	-4.6484	0.36594	0.60713	-1.5425	1.5568	0.47522	-0.88886	1.1318	0.37006	-1.7431	-2.1852	-0.60138	1.2913	0
								Bambiraptor	Dromaeosauridae	AMNH 30556	Smith et al., 2005	842	-5.1965	1.5807	0.58859	-0.26135	1.1218	1.9744	1.0025	-0.48536	0.77623	0.095501	-0.011174	-0.60587	-0.0016059	0
								Bambiraptor	Dromaeosauridae	AMNH 30556	Smith et al., 2005	843	-4.1655	0.063432	0.49467	-1.4789	1.4799	-0.0073306	-2.7089	1.1328	0.6835	-3.7949	-4.6517	-0.81204	2.6581	0
								Bambiraptor	Dromaeosauridae	AMNH 30556	Smith et al., 2005	844	-4.6652	-0.21023	0.85812	-1.9616	1.9279	0.39358	0.27873	0.74381	-0.76567	-0.62512	-0.37619	0.59393	0.020331	0
								Bambiraptor	Dromaeosauridae	AMNH 30556	Smith et al., 2005	845	-4.542	0.1387	0.74124	-1.7996	1.6075	0.54942	0.20929	0.80506	-0.15379	-0.81027	-0.82116	0.022473	0.40924	0
								Bambiraptor	Dromaeosauridae	AMNH 30556	Smith et al., 2005	846	-4.9658	0.27467	0.76282	-2.2583	1.4493	0.7629	0.53492	0.70226	0.077784	-0.94593	-0.9614	0.13545	0.45058	0
								Bambiraptor	Dromaeosauridae	AMNH 30556	Smith et al., 2005	847	-4.7429	-0.026161	0.48796	-1.9581	1.6059	0.4692	-0.45541	0.83544	-1.2238	-0.31588	0.027806	1.719	-0.60097	0
								Bambiraptor	Dromaeosauridae	AMNH 30556	Smith et al., 2005	848	-4.2402	0.48535	0.24851	-1.6599	1.1052	0.53452	-0.42582	1.394	-0.34586	-0.060606	-0.13518	0.63424	-0.19721	0
								Bambiraptor	Dromaeosauridae	AMNH 30556	Smith et al., 2005	849	-4.8504	1.7321	0.41798	0.8832	1.2616	1.9757	0.12348	-0.64439	0.44493	0.31662	0.19225	-0.54028	-0.20138	0
								Deinonychus	Dromaeosauridae	YPM 5232 66-11	Young et al., 2019 (C.H. pers. measurements)	850	-3.0116	1.3875	0.53252	0.72767	-0.79998	-0.80772	0.59254	0.63483	-0.76924	-0.37712	0.23406	-0.66341	-0.027599	0
								Deinonychus	Dromaeosauridae	YPM 5232 66-11	Young et al., 2019 (C.H. pers. measurements)	851	-2.3803	0.35241	0.044001	0.24664	-2.3066	-1.0136	-0.50057	-0.50889	0.6669	0.95129	0.77208	-1.4828	0.021119	0
								Deinonychus	Dromaeosauridae	YPM 5232 66-11	Young et al., 2019 (C.H. pers. measurements)	852	-2.5679	0.13637	0.083452	0.014928	-2.3293	-1.0786	-0.61833	-0.48509	0.98409	1.1199	0.77425	-2.1261	0.24785	0
								Deinonychus	Dromaeosauridae	YPM 5232 612	Young et al., 2019 (C.H. pers. measurements)	853	-1.9532	1.4168	0.054374	0.64699	-1.227	-0.38713	-0.56119	-0.41545	-1.2304	-0.6765	0.20918	0.38983	-0.44613	0
								Deinonychus	Dromaeosauridae	YPM 5232 612	Young et al., 2019 (C.H. pers. measurements)	854	-2.2213	0.099315	-0.12113	0.54247	-2.8775	-0.91353	-1.2677	-1.8681	0.41304	0.46594	0.45848	-0.4963	-0.16927	0
								Deinonychus	Dromaeosauridae	YPM 5232 612	Young et al., 2019 (C.H. pers. measurements)	855	-2.8301	0.6665	-0.1913	2.2192	-3.1397	-1.0055	-1.8983	-2.1535	0.3489	-0.46048	-0.67752	0.88783	-0.0727	0
								Deinonychus	Dromaeosauridae	YPM 5232 557	Young et al., 2019 (C.H. pers. measurements)	856	-1.8143	1.6879	-0.46384	-0.28524	-2.3947	-0.40304	-0.36817	0.18008	-0.14184	-0.48117	-0.30119	2.1115	-0.64698	0
								Deinonychus	Dromaeosauridae	YPM 5232 557	Young et al., 2019 (C.H. pers. measurements)	905	-1.92	-0.22653	0.46681	0.29296	-1.9315	-0.73798	0.65717	-2.2647	0.87562	0.30337	0.12855	0.25698	-0.091464	0
								Deinonychus	Dromaeosauridae	YPM 5232 609	Young et al., 2019 (C.H. pers. measurements)	906	-1.5461	1.2084	0.13968	-0.010597	-1.2844	-0.43423	0.022569	-0.38083	-1.1506	-0.62426	0.38437	0.0075958	-0.37602	0
								Deinonychus	Dromaeosauridae	YPM 5232 610C	Young et al., 2019 (C.H. pers. measurements)	907	-2.3416	0.28279	-0.0013582	0.30213	-2.2529	-1.1183	-0.83152	-0.61993	0.072273	0.60228	0.65324	-0.54229	-0.22797	0
								Deinonychus	Dromaeosauridae	YPM 5232 610	Young et al., 2019 (C.H. pers. measurements)	908	-1.6305	-0.13188	0.28902	0.64223	-2.1129	-0.70494	0.1815	-2.2394	1.1764	0.57003	0.17541	-0.21169	0.0050127	0
								Deinonychus	Dromaeosauridae	YPM 5232 83	Young et al., 2019 (C.H. pers. measurements)	909	-1.5759	0.72092	0.54789	0.17465	-0.49803	-0.50086	0.75867	-0.6394	-0.73332	-0.4749	0.18552	0.2348	-0.23322	0
								Deinonychus	Dromaeosauridae	YPM 5232 17	Young et al., 2019 (C.H. pers. measurements)	910	-1.273	-0.53109	0.1378	-0.27456	-2.1393	-0.91189	0.00065591	-1.7143	1.4892	0.90588	0.19025	0.066495	-0.011757	0
								Deinonychus	Dromaeosauridae	YPM 5232 78	Young et al., 2019 (C.H. pers. measurements)	911	-1.6587	0.021559	0.082041	0.45702	-1.8975	-0.83749	-0.36468	-1.2511	1.0821	0.77527	0.17345	0.086809	-0.087782	0
								Deinonychus	Dromaeosauridae	YPM 5232 285	Young et al., 2019 (C.H. pers. measurements)	912	-1.5864	0.59196	0.36424	0.33111	-0.50386	-0.88115	0.19516	0.039617	-0.59894	-0.30426	-0.094822	1.2105	-0.343	0
								Deinonychus	Dromaeosauridae	YPM 5232 305	Young et al., 2019 (C.H. pers. measurements)	913	-1.274	-0.61617	0.1155	0.28847	-2.1069	-1.1432	-0.77882	-1.9163	0.681	0.52106	0.16645	0.17242	-0.090571	0
								Deinonychus	Dromaeosauridae	YPM 5232 66-11	Smith et al., 2005	914	-2.705	-0.26092	0.15607	0.04881	-0.083489	0.36698	-0.50725	-0.64948	1.2208	1.0543	0.26437	-0.81419	0.094204	0
								Deinonychus	Dromaeosauridae	YPM 5232 66-11	Smith et al., 2005	915	-2.0937	-0.45332	-0.32112	-0.2643	-0.93938	0.0048275	-1.2369	-0.23717	1.4243	1.5936	0.525	-0.34356	-0.16987	0
								Deinonychus	Dromaeosauridae	YPM 5232 66-11	Smith et al., 2005	916	-2.3858	-0.10776	-0.39281	-0.54126	-0.97507	0.11621	-1.1136	0.33316	1.6122	1.6524	0.4998	-0.56193	-0.10036	0
								Deinonychus	Dromaeosauridae	YPM 5232 612	Smith et al., 2005	917	-2.3909	-0.33405	-0.40509	-0.58869	-0.97793	-0.036093	-1.3118	0.33467	1.5188	1.778	0.60077	-0.42221	-0.17886	0
								Deinonychus	Dromaeosauridae	YPM 5232 612	Smith et al., 2005	918	-2.8698	0.023587	-0.42332	0.16746	-0.70227	0.27832	-1.6715	0.13281	1.385	1.9554	0.78502	-0.46465	-0.3348	0
								Deinonychus	Dromaeosauridae	YPM 5232 557	Smith et al., 2005	922	-2.1083	-0.50391	-0.24197	-0.60005	-0.90686	-0.030077	-0.94939	-0.13307	1.4701	1.4209	0.38668	-0.41045	-0.052635	0
								Deinonychus	Dromaeosauridae	YPM 5232 557	Smith et al., 2005	923	-2.4586	0.073426	-0.30098	-0.24393	-1.2382	0.60317	-0.61873	-0.8255	1.9769	1.436	0.34909	-0.52915	-0.06448	0
								Deinonychus	Dromaeosauridae	YPM 5232 557	Smith et al., 2005	924	-2.1322	-0.58092	-0.11894	-0.85346	-0.90301	0.081036	-0.55112	-0.55115	1.4086	1.1142	0.24455	-0.15493	-0.04716	0
								Deinonychus	Dromaeosauridae	YPM 5232 557	Smith et al., 2005	925	-1.9578	-0.33962	0.03367	-0.45708	-0.66172	0.19527	-0.18212	-0.51113	1.662	0.9168	0.0086448	-0.9745	0.32119	0
								Deinonychus	Dromaeosauridae	YPM 5232 557	Smith et al., 2005	926	-1.994	-0.058795	0.34486	-0.078115	0.69334	0.67591	-0.23456	-1.5003	-0.89914	-0.72956	-0.21916	1.6361	-0.51453	0
								Deinonychus	Dromaeosauridae	MCZ8791	Smith et al., 2005	927	-2.6615	0.085692	-0.71777	-1.6449	-1.6226	-0.244	-2.9165	1.3911	3.0047	-0.71287	-2.7946	-1.3988	1.9184	0
								Dromaeosaurus	Dromaeosauridae	AMNH 5356	Hendrickx et al., 2015	928	-1.7489	0.066359	0.55004	-0.89422	-0.431	-1.3964	0.65315	1.1896	0.88461	-0.46424	-1.1884	0.2576	0.72054	0
								Dromaeosaurus	Dromaeosauridae	AMNH 5356	Hendrickx et al., 2015	929	-2.1713	0.58567	0.3718	0.22408	-0.96194	-1.2284	0.16758	0.91208	0.5822	0.13798	-0.29372	-0.77695	0.44038	0
								Dromaeosaurus	Dromaeosauridae	AMNH 5356	Hendrickx et al., 2015	930	-2.2346	-0.23695	0.8743	0.6925	-0.41149	-1.7192	1.0384	0.31722	0.21728	0.12348	-0.25966	0.48044	0.15546	0
								Dromaeosaurus	Dromaeosauridae	AMNH 5356	Hendrickx et al., 2015	931	-2.3054	0.59413	0.6666	0.38975	-0.71494	-0.71537	1.2293	-0.50744	0.010967	-0.13842	-0.0039945	0.58878	-0.16055	0
								Dromaeosaurus	Dromaeosauridae	AMNH 5356	Hendrickx et al., 2015	932	-2.039	1.0807	0.3764	0.27779	-1.1837	-0.38932	0.87315	-0.56517	-0.084265	-0.21795	0.14678	0.16794	-0.20375	0
								Dromaeosaurus	Dromaeosauridae	AMNH 5356	Hendrickx et al., 2015	933	-2.6081	0.48829	0.54093	0.59998	-0.89318	-1.0147	0.3367	-0.21519	-0.29825	-0.017023	0.16563	0.088547	-0.12511	0
								Dromaeosaurus	Dromaeosauridae	AMNH 5356	Hendrickx et al., 2015	934	-2.1563	0.5203	0.57455	0.63151	-0.079825	-1.2687	-0.20749	0.57488	-1.6305	-0.43043	0.32912	0.11376	-0.26944	0
								Dromaeosaurus	Dromaeosauridae	AMNH 5356	Hendrickx et al., 2015	935	-3.2048	0.55385	0.87054	1.4418	-0.70975	-1.5375	2.3071	0.98328	1.7334	0.58619	-0.82426	1.8956	0.086484	0
								Dromaeosaurus	Dromaeosauridae	AMNH 5356	Hendrickx et al., 2015	936	-2.4216	0.13581	1.1631	2.0006	0.4744	-1.5697	2.4653	0.69025	1.2623	0.56029	-0.79614	2.4381	-0.057638	0
								Dromaeosaurus	Dromaeosauridae	AMNH 5356	Hendrickx et al., 2015	937	-3.3251	0.72292	0.72802	1.4484	-0.53773	-1.9329	1.3951	2.3137	2.0391	0.18047	-1.692	1.2772	0.74727	0
								Dromaeosaurus	Dromaeosauridae	AMNH 5356	Smith et al., 2005	938	-1.7675	0.18063	0.12174	-0.44876	0.54064	0.082095	-0.34067	0.89094	0.094965	0.14355	-0.10017	-0.36795	0.12026	0
								Dromaeosaurus	Dromaeosauridae	AMNH 5356	Smith et al., 2005	939	-1.8488	-0.27281	0.1666	-0.40732	0.5989	-0.12759	-0.60167	0.62588	-0.091718	0.39338	0.14491	-0.11264	-0.057338	0
								Dromaeosaurus	Dromaeosauridae	AMNH 5356	Smith et al., 2005	940	-1.7313	-0.075662	-0.063933	-0.59834	0.067823	-0.2038	-0.87517	1.142	0.7013	0.44976	-0.2456	-0.76415	0.36191	0
								Dromaeosaurus	Dromaeosauridae	AMNH 5356	Smith et al., 2005	941	-2.1837	-0.3424	0.095035	-0.56638	0.19729	0.041223	-0.61326	0.096589	0.23067	0.57855	0.21854	0.15163	-0.1762	0
								Dromaeosaurus	Dromaeosauridae	AMNH 5356	Smith et al., 2005	942	-2.0791	0.049327	-0.047718	-0.39599	0.027912	0.22645	-0.62381	0.2481	0.35422	0.641	0.24993	0.085552	-0.21319	0
								Dromaeosaurus	Dromaeosauridae	AMNH 5356	Smith et al., 2005	943	-2.4854	1.0479	-0.067305	0.065806	0.25347	0.9519	-0.2725	0.18749	0.24806	0.35005	0.19082	0.11072	-0.30763	0
								Dromaeosaurus	Dromaeosauridae	AMNH 5356	Smith et al., 2005	944	-2.1783	0.69194	0.18977	1.1965	0.64185	0.84956	-0.36136	-0.55923	0.33644	0.51506	0.27132	-0.68832	-0.09253	0
								Dromaeosaurus	Dromaeosauridae	AMNH 5356	Smith et al., 2005	945	-2.0411	0.49373	0.20066	0.3082	0.50628	0.74253	-0.028222	-0.50428	0.029202	0.1467	0.14699	0.068094	-0.22687	0
								Dromaeosaurus	Dromaeosauridae	AMNH 5356	Smith et al., 2005	946	-1.9138	-0.079482	0.18343	0.12315	0.46924	0.17524	-0.46195	0.020686	0.2373	0.53664	0.21568	-0.39616	-0.039545	0
								Dromaeosaurus	Dromaeosauridae	AMNH 5356	Smith et al., 2005	947	-1.879	-0.070715	0.15351	0.14	0.41509	0.20049	-0.50241	-0.067651	0.19412	0.53318	0.23854	-0.25312	-0.10277	0
								Dromaeosaurus	Dromaeosauridae	AMNH 5356	Smith et al., 2005	948	-2.4096	0.23517	0.067552	0.2435	0.5698	0.23867	-0.83289	0.63791	0.34703	0.82192	0.31776	-0.67868	-0.033919	0
								Velociraptor	Dromaeosauridae	AMNH 6515	Hendrickx et al., 2015	949	-3.9288	-1.6631	1.6544	0.57338	-0.71381	-2.2398	-0.98197	2.3181	1.1285	-4.8946	3.7525	1.1916	-2.386	0
								Velociraptor	Dromaeosauridae	AMNH 6515	Hendrickx et al., 2015	950	-3.5462	0.99637	0.72653	1.0636	-1.4101	-1.5666	-0.26183	-0.31698	-3.6647	-1.9224	0.56478	-0.31543	-0.45263	0
								Velociraptor	Dromaeosauridae	AMNH 6515	Hendrickx et al., 2015	951	-3.3839	0.69117	0.70347	-0.77093	-0.9139	-1.5803	0.11534	0.9716	-3.0263	-1.3624	0.69893	-0.87734	-0.23127	0
								Velociraptor	Dromaeosauridae	AMNH 6515	Hendrickx et al., 2015	952	-4.8614	0.94425	1.0622	-0.069676	-1.3334	-1.7041	0.99503	0.46516	-3.3399	-1.8347	0.59856	-0.46549	-0.32351	0
								Velociraptor	Dromaeosauridae	AMNH 6515	Hendrickx et al., 2015	901	-2.0378	-2.4023	-8.9304	1.295	-0.17196	1.8501	1.5144	0.75525	0.40938	-0.93632	-0.52949	-0.77236	0.28744	0
								Velociraptor	Dromaeosauridae	AMNH 6515	Hendrickx et al., 2015	902	-3.8115	0.68473	0.69451	-0.86292	-1.0973	-1.768	0.69624	1.537	-1.9152	-1.1224	0.081531	0.27674	-0.14584	0
								Velociraptor	Dromaeosauridae	AMNH 6518	Young et al., 2019 (C.H. pers. measurements)	903	-2.9014	0.41575	-0.23577	-1.2026	0.97129	-0.27886	-1.1453	1.4132	-0.89551	0.34301	0.2911	1.3643	-0.6163	0
								Velociraptor	Dromaeosauridae	AMNH 6518	Young et al., 2019 (C.H. pers. measurements)	904	-2.7373	0.43182	-0.35394	-1.1988	0.59321	-0.055723	-1.3883	0.53628	-1.0111	-0.15599	-0.059014	2.2474	-0.74513	0
								Velociraptor	Dromaeosauridae	AMNH 6518	Young et al., 2019 (C.H. pers. measurements)	905	-3.0806	0.81515	-0.55634	-0.60626	0.63972	0.10953	-2.1858	0.72281	-1.0499	-0.023927	-0.06736	2.2704	-0.81955	0
								Velociraptor	Dromaeosauridae	AMNH 6518	Young et al., 2019 (C.H. pers. measurements)	906	-3.3485	0.34738	-0.17464	-0.79365	1.7375	-0.63138	-1.7167	2.5424	-1.301	0.93848	0.76838	0.78658	-0.68049	0
								Velociraptor	Dromaeosauridae	AMNH 6515	Smith et al., 2005	907	-4.2793	0.67372	-0.30556	-0.6635	-1.2554	1.2989	-0.50809	-0.90247	2.3868	1.5396	0.32572	-0.36795	-0.1565	0
								Velociraptor	Dromaeosauridae	AMNH 6515	Smith et al., 2005	908	-4.4625	0.93277	-0.41379	-0.067752	-0.87983	1.0938	-1.1187	0.24508	2.4423	2.1528	0.63667	-1.2723	-0.058921	0
								Velociraptor	Dromaeosauridae	AMNH 6515	Smith et al., 2005	909	-3.6831	0.098171	0.073911	-2.2195	0.91918	0.039895	-0.78468	1.9672	-0.74611	0.0016689	-0.015453	1.2361	-0.4023	0
								Velociraptor	Dromaeosauridae	AMNH 6515	Smith et al., 2005	910	-3.1515	-1.8823	0.44288	-1.2322	0.042981	-0.60131	-0.87051	-0.62472	1.1349	1.0697	0.080123	-0.52204	0.29539	0
								Velociraptor	Dromaeosauridae	AMNH 6515	Smith et al., 2005	911	-3.8557	-1.1175	0.054355	-2.0221	-0.7351	-0.23103	-1.1147	0.080472	2.0827	0.86906	-0.56003	-0.675	0.64119	0
								Velociraptor	Dromaeosauridae	AMNH 6515	Smith et al., 2005	912	-4.7734	-0.93894	-0.3151	-2.4866	-1.3375	0.37171	-1.6073	-1.0287	1.3288	1.0815	0.078182	1.9291	-0.59824	0
								Velociraptor	Dromaeosauridae	AMNH 6515	Smith et al., 2005	913	-4.683	0.10847	0.58791	-1.207	1.9549	0.4456	-0.54404	1.0436	-1.0214	-0.12977	0.043538	0.74972	-0.32095	0
								Velociraptor	Dromaeosauridae	uncat, GIN	Smith et al., 2005	914	-2.6936	-0.22684	0.5475	-0.091122	1.8335	-0.065254	-0.65873	0.88775	-0.97222	0.015505	0.11559	-0.087174	-0.07673	0
								Velociraptor	Dromaeosauridae	uncat, GIN	Smith et al., 2005	915	-2.4474	-0.16456	0.061488	-1.6571	0.83063	-0.30681	-0.81893	1.872	-0.72953	0.030426	-0.016726	0.78046	-0.23753	0
								Velociraptor	Dromaeosauridae	uncat, GIN	Smith et al., 2005	916	-2.687	0.38228	-0.097861	-1.7325	0.36159	0.075604	-0.66052	1.8813	-0.0179	-0.012787	-0.29723	0.41004	-0.011827	0
								Velociraptor	Dromaeosauridae	uncat, GIN	Smith et al., 2005	917	-3.5621	0.62093	-0.24987	-2.1026	0.42636	0.18486	-1.0032	2.4828	-0.23818	0.35383	0.053398	0.89035	-0.37152	0
								Velociraptor	Dromaeosauridae	uncat, GIN	Smith et al., 2005	918	-3.4635	1.2358	-0.078919	-1.407	-0.19372	1.3148	0.45886	0.18996	0.59648	0.12447	0.01534	0.7604	-0.39199	0
								Velociraptor	Dromaeosauridae	uncat, GIN	Smith et al., 2005	919	-3.1549	-0.19029	0.40562	-1.8586	1.0422	0.14349	0.020515	0.8553	-0.68918	-0.30834	-0.11142	0.97959	-0.24763	0
								Buitreraptor	Dromaeosauridae	MPCA 245 A1	Gianechini et al., 2011	920	-5.7606	2.3482	-0.5166	-3.078	-0.84325	1.7462	-0.95697	1.8064	2.2645	-1.4989	-2.606	0.13643	1.1353	0
								Buitreraptor	Dromaeosauridae	MPCA 245 A5	Gianechini et al., 2011	921	-5.6375	1.9534	0.25642	-0.40079	0.2301	2.8837	0.62941	-2.5689	0.39743	-0.61373	-0.27302	1.9147	-0.77781	0
								Unnamned dromaeosaurid	Dromaeosauridae	UC indet.	Hendrickx et al., 2015	922	-1.2142	0.8221	0.23817	1.1627	-1.2757	-1.5352	-5.2063	-0.6314	3.4016	-8.8967	-11.254	-1.6821	6.4116	0
								Unnamned dromaeosaurid	Dromaeosauridae	UC indet.	Hendrickx et al., 2015	923	-1.0834	0.074735	0.84395	0.50199	-0.01705	-0.89065	1.3134	-0.82695	-0.55258	-0.35254	0.026693	0.83145	-0.21667	0
								Unnamned dromaeosaurid	Dromaeosauridae	UC indet.	Hendrickx et al., 2015	924	-1.2019	0.44966	0.61114	0.52992	-0.40429	-0.99836	0.86595	-0.12273	-0.5262	-0.29822	0.046575	0.28597	-0.10225	0
								Unnamned dromaeosaurid	Dromaeosauridae	UC indet.	Hendrickx et al., 2015	925	-2.04	-0.016862	1.121	-2.09	2.0728	-1.7708	5.2013	5.8944	-1.3484	7.0967	7.6058	-2.7766	-2.8108	0
								Unnamned dromaeosaurid	Dromaeosauridae	UC indet.	Hendrickx et al., 2015	926	-0.41208	0.054065	0.16194	-2.0897	-1.2314	-0.8195	-0.07817	0.015575	0.10261	-0.67117	-0.34109	-1.373	0.62534	0
								Unnamned dromaeosaurid	Dromaeosauridae	UC indet.	Hendrickx et al., 2015	927	-1.0723	0.28871	0.41351	-0.97685	-1.0312	-0.71511	0.51948	-0.29817	0.27494	-0.35064	-0.11725	-1.4174	0.51459	0
								Unnamned dromaeosaurid	Dromaeosauridae	UC indet.	Hendrickx et al., 2015	928	-0.71555	0.20933	-0.13434	-2.0192	-1.3301	-0.63371	-0.54024	0.51164	1.8405	-0.13769	-1.15	-0.76967	0.93764	0
								Unnamned dromaeosaurid	Dromaeosauridae	UC indet.	Hendrickx et al., 2015	929	-0.97701	-0.09677	0.21318	-0.41613	-1.4724	-1.2493	0.19393	-0.21036	0.27021	0.29341	0.1641	0.20318	-0.07535	0
								Unnamned dromaeosaurid	Dromaeosauridae	UC indet.	Hendrickx et al., 2015	930	-1.1281	0.74615	0.30098	-1.6708	-0.8676	-0.35306	0.85114	0.049443	-0.30372	-0.54892	0.07903	-0.43247	0.057354	0
								Saurornitholestes	Dromaeosauridae	TMP 94.12.844	Young et al., 2019 (C.H. pers. measurements)	931	-2.5684	0.80048	0.64781	-0.88647	-1.0163	-0.6408	0.70231	-0.67355	-2.2843	-1.3246	0.62432	-0.39992	-0.36444	0
								Saurornitholestes	Dromaeosauridae	TMP 94.12.844	Young et al., 2019 (C.H. pers. measurements)	932	-2.614	-0.0031049	0.24471	-0.95756	-2.7191	-0.7855	-0.20734	-2.0471	-0.64298	-0.28907	0.78681	-0.95817	-0.21096	0
								Saurornitholestes	Dromaeosauridae	TMP 94.12.844	Young et al., 2019 (C.H. pers. measurements)	933	-2.4231	-0.18801	0.3805	-0.39374	-2.5083	-0.84099	-0.12715	-2.4921	-0.58598	-0.38987	0.58809	-0.6809	-0.17223	0
								Saurornitholestes	Dromaeosauridae	TMP 88.121.39	Young et al., 2019 (C.H. pers. measurements)	934	-3.3233	1.2142	0.69752	0.68724	-1.4146	-0.74292	1.0838	-0.85083	-1.5408	-1.2345	0.1168	0.6092	-0.39508	0
								Saurornitholestes	Dromaeosauridae	TMP 88.121.39	Young et al., 2019 (C.H. pers. measurements)	935	-3.2205	0.10499	0.30769	-0.13747	-2.7536	-1.2135	0.14682	-1.3335	-0.035122	-0.078809	0.30802	0.1504	-0.21988	0
								Saurornitholestes	Dromaeosauridae	TMP 88.121.39	Young et al., 2019 (C.H. pers. measurements)	936	-2.9925	-0.066011	0.28443	0.53712	-2.5166	-1.1485	-0.66242	-1.8692	-0.17818	0.029308	0.41719	-0.41841	-0.14569	0
								Troodon	Troodontidae	DMNH 22837	Hendrickx et al., 2015 (updated)	937	-3.1129	3.6953	0.34197	2.724	-0.26224	0.65536	2.2265	0.9493	0.65766	-0.43388	-0.77476	2.0931	-0.45136	0
								Troodon	Troodontidae	DMNH 22670	Hendrickx et al., 2015 (updated)	938	-3.1088	4.1267	-0.03025	2.3124	-0.9696	0.64271	1.3644	1.4964	0.083845	-0.44106	-0.26846	0.79234	-0.43428	0
								Troodon	Troodontidae	DMNH 22337	Hendrickx et al., 2015 (updated)	939	-2.5255	3.1891	0.13412	1.951	-0.39727	0.69727	0.69275	0.44214	-0.21425	-0.3044	0.07591	-0.15679	-0.30261	0
								Troodon	Troodontidae	BMNH R12568	Young et al., 2019 (C.H. pers. measurements)	940	-3.1188	3.1372	-0.15082	1.1468	-1.8765	0.13302	0.25945	0.89994	-0.73601	-0.237	0.66891	-0.92776	-0.41224	0
								Troodon	Troodontidae	MOR 553	Smith et al., 2005	941	-3.2178	1.3783	-0.46783	0.25971	-0.85456	1.3296	-0.70227	-0.13632	1.7078	1.3588	0.43597	-0.4992	-0.27039	0
								Troodon	Troodontidae	MOR 553	Smith et al., 2005	942	-2.5991	2.5878	-0.57449	0.49355	-0.43738	1.9354	-0.29282	0.2043	0.62667	0.26029	0.11294	0.4601	-0.55338	0
								Troodon	Troodontidae	MOR 553	Smith et al., 2005	943	-2.5281	1.8999	-0.41408	0.3845	0.067907	1.5064	-0.87392	0.0042137	-0.24658	-0.23693	-0.11366	1.259	-0.64753	0
								Troodon	Troodontidae	MOR 553	Smith et al., 2005	944	-3.1415	1.7164	-0.39651	-0.44917	-0.10462	1.1812	-0.47041	1.2093	0.62942	0.68027	0.2722	0.072587	-0.37802	0
								Troodon	Troodontidae	MOR 553	Smith et al., 2005	945	-3.6118	1.9126	-0.58498	-0.79302	-0.8673	1.8779	-0.63748	-0.50355	0.6123	-0.07549	-0.23222	1.8216	-0.73312	0
								Zanabazar	Troodontidae	GIN 100/1	Smith et al., 2005	946	-3.4426	1.3397	0.14683	1.1991	1.4268	0.80979	-1.0037	1.4264	0.34904	0.78256	0.21512	-1.6779	0.21014	0
								Zanabazar	Troodontidae	GIN 100/1	Smith et al., 2005	947	-3.676	2.2819	-0.19086	0.98927	0.41535	1.4754	-0.84524	1.2823	1.6709	0.44594	-0.55428	-2.1769	0.70284	0
								Zanabazar	Troodontidae	GIN 100/1	Smith et al., 2005	948	-3.4835	2.3754	-0.46717	0.9645	0.063335	1.6024	-0.77082	1.1583	1.0914	1.3392	0.63378	-0.99811	-0.32661	0
								Zanabazar	Troodontidae	GIN 100/1	Smith et al., 2005	949	-3.4786	1.1911	0.16014	0.089308	0.94067	0.86072	-0.55731	1.1179	0.65256	0.092878	-0.43235	-1.184	0.44239	0
								Zanabazar	Troodontidae	GIN 100/1	Smith et al., 2005	950	-3.184	1.4067	-0.024507	0.87281	0.61097	1.3353	-0.65382	-0.16728	0.17519	0.4068	0.23334	-0.0044226	-0.36953	0
								Zanabazar	Troodontidae	GIN 100/1	Smith et al., 2005	951	-3.7211	1.7012	-0.036456	0.12359	0.50036	1.3056	-0.31415	0.93846	0.94965	0.48085	-0.074061	-0.99451	0.14167	0
								Zanabazar	Troodontidae	GIN 100/1	Smith et al., 2005	952	-3.9329	2.3764	-0.0087615	2.2428	0.90714	1.9622	-0.58502	0.029448	0.95264	1.0931	0.5357	-1.6315	-0.12158	0
								Zanabazar	Troodontidae	GIN 100/1	Smith et al., 2005	953	-3.1896	2.1994	-0.31635	1.5399	-0.11589	2.0924	-0.7797	-1.1478	0.79953	0.24735	-0.046102	0.14578	-0.38516	0
								Pectinodon	Troodontidae	BMNH R8403	Young et al., 2019 (C.H. pers. measurements)	954	-5.4561	2.8763	-0.78164	-1.1202	-0.67598	2.3011	-0.62769	-0.67002	0.9653	-0.023295	-0.34944	2.1586	-0.81206	0
								Aerosteon	Abelisauridae	MCNA-PV-3137; cast	Hendrickx et al., 2015	954	0.51256	0.17412	0.22514	-0.69983	-0.20244	-0.031031	-0.13192	-1.401	-0.48401	-0.087886	0.51471	-0.68217	-0.13552	0
					Coelurosauria
[truncated: 16 more columns]

## Sheet: reconstructed teeth results
								PC Scores																			Loadings																Confusion Matrix
								Taxa (Genus)	Clade	Specimen	Source	Axis 1	Axis 2	Axis 3	Axis 4	Axis 5	Axis 6	Axis 7	Axis 8	Axis 9	Axis 10	Axis 11	Axis 12	Axis 13	Axis 14			Axis 1	Axis 2	Axis 3	Axis 4	Axis 5	Axis 6	Axis 7	Axis 8	Axis 9	Axis 10	Axis 11	Axis 12	Axis 13	Axis 14			Basalmost Theropoda	Non-averostran Neotheropoda	Non-abelisauroid Ceratosauria	Noasauridae	Abelisauridae	Non-megalosauran Megalosauroidea
Tooth	Discriminant Function Analysis	Reclassification Rate (RR)	Clade level		Clade level (Eigenvalue)			?	?	DMNH2013-07-1083	This study	-2.0536	-0.14266	0.81765	-0.7601	-1.373	-0.68935	1.2353	-1.9612	-0.7143	-0.44248	0.70001	-1.0637	-0.050904	0		CBL	0.1541	0.021767	0.005756	-0.032196	-0.03476	-0.0033764	0.0018651	0.01406	0.0053902	0.0078813	0.015231	0.0013579	-0.0059692	0		Basalmost Theropoda	21	0	0	0	0	0
			PC1 (%)	PC2 (%)	Axis 1	Axis 2		?	?	DMNH2013-07-1081	This study	0.51201	-0.30873	0.71693	-1.7303	-0.32849	0.47683	0.7624	-1.811	-0.79676	-0.51271	0.80011	-1.9769	0.090355	0		CBW	0.16459	0.013217	0.041454	0.041959	0.01161	-0.0040774	0.040474	0.010387	0.027321	0.0095176	-0.017195	-0.01102	0.016882	0		Non-averostran Neotheropoda	0	20	0	0	0	3
DMNH2013-07-1083	Dromaeosauridae	56.91	52.52	19.82	4.75	1.793		?	?	DMNH2014-06-06	This study	0.38854	-0.11581	0.6728	-1.3844	0.016111	0.23977	0.37994	-1.0168	-1.1803	-0.67288	0.60174	-1.5288	0.042787	0		CH	0.16108	0.0090006	0.025659	-0.04913	-0.019283	0.0039674	0.069404	-0.0054384	0.02016	-0.017173	-0.0012311	0.00043339	0.0032619	0		Non-abelisauroid Ceratosauria	0	0	7	0	1	2
DMNH2013-07-1081	Metriacanthosauridae							?	?	DMNH2013-07-1701	This study	0.052821	0.31619	0.21506	0.52103	0.45648	-0.71449	-0.60025	0.32316	-0.2865	0.39842	0.20822	0.022305	-0.12732	0		AL	0.15757	0.0092868	0.018662	-0.053956	-0.018411	-0.002292	0.055117	0.02129	0.024753	-0.01132	0.00085234	-0.019643	0.012296	0		Noasauridae	0	0	0	7	0	0
DMNH2014-06-06	Metriacanthosauridae							?	?	SMU77218	This study	-1.7665	0.13341	0.13149	1.5668	-1.1142	-1.2758	-1.3256	-0.41347	-0.087882	0.66075	0.35693	-0.067092	-0.20106	0		CBR	0.010488	-0.0085496	0.035698	0.074154	0.04637	-0.00070095	0.038609	-0.0036734	0.02193	0.0016363	-0.032426	-0.012378	0.022851	0		Abelisauridae	0	0	0	0	49	4
DMNH-07-1701	Non-megalosauran Megalosauroidea							?	?	DMNH2013-07-1080	This study	-0.5121	0.8201	-0.096803	0.27548	-0.19045	-0.63294	-1.0476	0.92925	-0.32949	0.75948	0.68332	-0.68956	-0.23282	0		CHR	0.0069811	-0.012652	0.019883	-0.016842	0.015357	0.0076936	0.067433	-0.019461	0.014621	-0.025166	-0.014645	5.8343e-05	0.012514	0		Non-megalosauran Megalosauroidea	0	0	0	0	2	13
SMU77218	Therizinosauria							?	?	DMNH2014-06-02	This study	-1.3588	0.83103	0.2413	0.10262	-0.30065	-0.59488	-0.46109	0.15365	-1.2101	-0.23258	0.48106	-0.23943	-0.30337	0		MCL	0.055388	0.030465	0.041904	-0.071512	0.08141	0.056059	-0.059525	-0.029262	0.039534	0.033204	0.0084449	-0.003308	-0.0054198	0		Megalosauridae	0	0	2	0	6	6
DMNH2013-07-1080	Non-megalosauran Megalosauroidea							?	?	SMU73779	This study	-5.3981	-0.85559	0.67364	0.93459	-3.6215	-2.6352	-0.6051	-1.4456	-0.70135	0.077328	0.66302	-0.67332	-0.092763	0		MCW	0.050087	-0.007526	-0.010692	-0.040947	0.1008	0.070382	-0.029356	-0.0077076	0.061333	0.042062	-0.013739	0.02586	0.0011558	0		Spinosauridae	0	0	0	0	0	1
DMNH2014-06-02	Megaraptora							?	?	SMU76947	This study	-4.6098	-2.46	3.5941	2.0928	-4.0801	5.0628	0.17874	2.4232	-0.3444	-2.989	1.8473	-1.4197	-1.4272	0		MCR	0.0020882	-0.012457	0.00856	0.021539	0.013234	0.0034701	0.015038	0.017632	0.026058	0.017642	-0.021444	0.033168	0.0048668	0		Metriacanthosauridae	0	0	0	0	0	0
SMU73779	Therizinosauria							?	?	SMU73778	This study	-6.6464	-0.93283	1.1639	2.232	-3.3201	-3.3917	0.067757	-1.0293	-0.99472	-0.44838	0.0075249	0.53204	-0.044566	0		LAF	0.0019836	-0.043661	0.03303	0.01721	-0.013408	0.043337	-0.011624	0.033301	0.038022	-0.064552	0.046904	0.00064664	-0.030104	0		Allosauridae	0	0	0	0	2	4
SMU76947	Noasauridae							?	?	SMU76948	This study	-5.4186	1.2556	0.73411	1.0184	-1.6274	-1.9919	0.22747	1.1515	-2.8439	-1.475	0.14224	1.2354	-0.6003	0		LIF	0.0038397	-0.057226	0.044482	0.01852	-0.03894	0.085004	0.00010558	0.037558	-0.021797	0.0097767	-0.01904	0.00085494	0.0021464	0		Megaraptora	0	1	0	0	0	0
SMU73778	Therizinosauria							?	?	DMNH2013-07-1082	This study	-3.1184	-0.40707	0.98807	-0.0061506	-1.6397	-1.1735	0.736	-0.46039	-0.29633	-0.24048	0.27217	-1.1423	0.23308	0		DDL	0.05184	0.070856	-0.0061397	0.020132	-0.018028	0.055186	0.03838	0.0081763	0.046447	0.0010866	0.00097247	-0.0077278	-0.00078497	0		Neovenatoridae	0	0	0	0	0	0
SMU76948	Therizinosauria							Eoraptor	Basalmost Theropoda	PVSJ 512	Hendrickx et al., 2015	-4.4101	0.038502	1.0055	-1.2633	2.2547	0.40854	1.3022	-0.47641	-0.60628	-0.35908	0.019043	0.23114	-0.044684	0		MDL	0.038876	0.064708	-0.0029229	0.012535	0.043142	0.040251	0.040449	0.051071	-0.027921	-0.058156	-0.001103	0.023057	-0.0091862	0		Carcharodontosauridae	0	0	0	0	1	2
DMNH-07-1082	Noasauridae							Eoraptor	Basalmost Theropoda	PVSJ 512	Hendrickx et al., 2015	-4.6823	1.1861	1.1901	0.7874	2.3851	1.3687	1.8768	-1.319	0.82304	-0.1716	-0.25868	-2.182	0.73667	0		CA	0.0065584	-0.0018266	0.012629	0.0071408	0.00068435	0.011033	0.035717	-0.04209	-0.010635	0.0025183	0.014242	0.034618	-0.01848	0		Basal Coelurosauria	2	0	0	0	0	0
								Eoraptor	Basalmost Theropoda	PVSJ 512	Hendrickx et al., 2015	-4.8257	1.3126	0.88576	-0.082216	1.6006	1.7501	2.2623	-1.9265	0.42766	0.19687	0.49791	-0.30793	-0.28006	0																		Non-tyrannosaurid Tyrannosauroidea	7	0	0	1	0	7
								Eoraptor	Basalmost Theropoda	PVSJ 512	Hendrickx et al., 2015	-4.4877	-0.1393	1.0705	-0.53762	2.8693	0.16084	0.47881	-0.26738	-1.1022	-0.37727	-0.0032468	0.10421	-0.011801	0																		Tyrannosauridae	0	0	0	0	4	15
								Eoraptor	Basalmost Theropoda	PVSJ 512	Hendrickx et al., 2015	-4.5604	0.2432	0.90535	0.034334	2.8813	0.20489	-0.099825	0.21341	-0.81358	-0.22061	-0.13277	-0.50415	0.20166	0																		Therizinosauria	0	0	0	0	1	0
								Eoraptor	Basalmost Theropoda	PVSJ 512	Hendrickx et al., 2015	-3.8142	-0.18656	0.84633	-0.11013	2.5784	0.10837	-0.06276	-0.67252	-1.4243	-0.39889	0.080128	0.76773	-0.30167	0																		Oviraptorosauria	0	0	0	0	0	0
								Eoraptor	Basalmost Theropoda	PVSJ 512	Hendrickx et al., 2015	-4.098	0.2539	0.39477	-1.3127	1.8108	0.041597	-0.24914	0.73547	-0.8148	-0.13277	-0.030266	0.79683	-0.23908	0																		Dromaeosauridae	13	1	0	4	0	8
								Eoraptor	Basalmost Theropoda	PVSJ 512	Hendrickx et al., 2015	-3.8202	-0.27183	0.025787	-0.82958	0.57204	-0.26785	-1.0342	0.25616	0.72852	1.1396	0.28119	-0.21884	-0.023342	0																		Troodontidae	0	0	0	0	0	0
								Eoraptor	Basalmost Theropoda	PVSJ 512	Hendrickx et al., 2015	-4.3542	-0.29534	0.60357	-0.61206	1.3998	-0.095862	-0.55313	-0.20503	1.0292	-0.069599	-0.9282	-1.3279	0.98127	0																		Total	43	22	9	12	66	65
								Eoraptor	Basalmost Theropoda	PVSJ 512	Hendrickx et al., 2015	-4.6292	-0.45501	0.1994	-1.7275	0.82632	-0.38827	-1.0758	0.67044	0.84891	0.48926	-0.46234	-0.28604	0.44055	0
								Eoraptor	Basalmost Theropoda	PVSJ 512	Hendrickx et al., 2015	-4.5249	0.064422	0.20481	0.97771	2.5348	-0.5743	-2.1795	2.0058	-0.64558	2.084	1.3439	-1.1119	-0.38938	0
								Eoraptor	Basalmost Theropoda	PVSJ 512	Young et al., 2019 (C.H. pers. measurements)	-5.0494	1.2122	0.30825	2.1501	3.6683	-0.077351	-2.1175	2.9833	-1.2481	2.1931	1.7014	-1.8265	-0.49041	0
								Eoraptor	Basalmost Theropoda	PVSJ 512	Smith & Lamanna, 2006	-3.6937	-1.2256	1.3565	-1.1721	2.8056	-0.11819	0.59381	-0.16571	-1.8061	-0.66434	0.088831	0.72621	-0.20337	0
								Eoraptor	Basalmost Theropoda	PVSJ 512	Smith & Lamanna, 2006	-4.7795	-0.59417	1.5518	-1.035	2.8855	0.61068	1.4482	-0.56358	-1.1014	-0.52313	0.12382	-0.023509	-0.028728	0
								Eoraptor	Basalmost Theropoda	PVSJ 512	Smith & Lamanna, 2006	-5.3385	1.1228	1.1796	-0.57518	1.6214	2.0233	2.5026	-1.1816	0.78442	0.010971	0.19202	-1.0829	0.12451	0
								Eoraptor	Basalmost Theropoda	PVSJ 512	Smith & Lamanna, 2006	-4.0286	-0.84401	1.3721	-0.077574	3.1387	0.17292	0.1658	-0.39624	-1.7506	-0.51475	0.13421	0.22669	-0.14564	0
								Eoraptor	Basalmost Theropoda	PVSJ 512	Smith & Lamanna, 2006	-5.1163	1.3277	0.82734	-0.45001	1.2552	1.9832	1.6942	-0.91157	0.72213	0.038153	0.10773	-0.63661	-0.015298	0
								Eoraptor	Basalmost Theropoda	PVSJ 512	Smith & Lamanna, 2006	-3.696	-0.55513	1.0017	-0.88574	2.3489	0.032794	0.032372	0.5468	-1.0423	-0.55516	-0.2766	-0.023156	0.1694	0
								Eoraptor	Basalmost Theropoda	PVSJ 512	Smith & Lamanna, 2006	-3.883	-0.30089	0.80915	-0.64206	2.2751	0.13821	-0.40117	0.74353	-1.1584	-0.25546	-0.015657	0.22471	-0.091364	0
								Eoraptor	Basalmost Theropoda	PVSJ 512	Smith & Lamanna, 2006	-4.2673	-0.00016912	0.86373	-1.1322	1.8578	0.6484	0.50562	0.12253	-0.65204	-0.3574	-0.063836	0.32538	-0.10469	0
								Eoraptor	Basalmost Theropoda	PVSJ 512	Smith & Lamanna, 2006	-3.974	-0.28274	0.90507	-0.34052	2.546	0.078098	-0.53953	0.91938	-1.027	-0.35519	-0.24095	-0.35602	0.21098	0
								Eoraptor	Basalmost Theropoda	PVSJ 512	Smith & Lamanna, 2006	-4.132	-0.20623	0.87616	-0.38925	2.5164	0.15137	-0.54536	0.93098	-1.0325	-0.29451	-0.17386	-0.25086	0.13352	0
								Eoraptor	Basalmost Theropoda	PVSJ 512	Smith & Lamanna, 2006	-3.7346	-0.31976	0.82343	-0.257	2.3948	0.12138	-0.53051	0.62212	-1.281	-0.17426	0.092477	0.16227	-0.14218	0
								Eoraptor	Basalmost Theropoda	PVSJ 512	Smith & Lamanna, 2006	-4.309	-0.69252	1.1854	-1.8025	2.386	0.088962	0.50489	0.53146	-0.87351	-1.0095	-0.69769	0.087416	0.40424	0
								Eoraptor	Basalmost Theropoda	PVSJ 512	Smith & Lamanna, 2006	-3.3308	-1.1724	1.0028	-1.0266	2.4866	-0.2567	-0.34691	0.020137	-2.1044	-0.67043	0.055463	1.4419	-0.45033	0
								Eoraptor	Basalmost Theropoda	PVSJ 512	Smith & Lamanna, 2006	-4.0225	-0.24587	0.62449	-1.0939	2.2037	-0.21471	-1.2219	1.8809	-0.83128	-0.65056	-0.8029	-0.2118	0.48198	0
								Eoraptor	Basalmost Theropoda	PVSJ 512	Smith & Lamanna, 2006	-4.6593	1.8251	0.0012147	-0.39677	0.60217	1.523	-0.26118	1.0147	0.89324	0.40729	-0.10327	-0.60227	0.028271	0
								Ischisaurus	Basalmost Theropoda	MACN 18.060	Hendrickx et al., 2015	-1.7997	1.1353	0.21256	0.40122	-1.0288	-0.96621	0.5796	1.0546	0.2226	0.1158	-0.092732	0.35324	-0.068613	0
								Ischisaurus	Basalmost Theropoda	MACN 18.060	Hendrickx et al., 2015	-1.9102	0.070394	0.50637	-0.30104	-0.18693	-1.8448	0.62112	1.9962	0.25035	0.032439	-0.70099	1.5958	0.068097	0
								Eodromaeus	Basalmost Theropoda	PVSJ 561	Hendrickx et al., 2015	-4.1586	-0.67795	1.4408	-2.0536	-0.64259	-2.868	1.9251	1.7416	-2.2945	-2.1238	-0.75175	1.0397	0.29183	0
								Coelophysis	Non-averostran Neotheropoda	CM 82931	Hendrickx et al., 2015	-4.8005	-2.9192	-11.849	0.076739	-0.61243	3.5602	3.1462	0.23843	1.1033	-2.0553	-1.335	-0.19872	0.45146	0
								Coelophysis	Non-averostran Neotheropoda	CM 82931	Hendrickx et al., 2015	-4.27	-3.3201	-9.1239	0.6366	0.84843	3.2203	5.3799	-1.4882	0.47271	-1.3002	0.026346	-1.074	0.1524	0
								Coelophysis	Non-averostran Neotheropoda	CM 81765	Hendrickx et al., 2015	-2.4286	-5.3946	-6.5652	-0.39182	2.7573	0.049634	2.4091	-0.011027	-2.6243	-2.0227	-0.30814	0.79008	0.025165	0
								Coelophysis	Non-averostran Neotheropoda	CM 81765	Hendrickx et al., 2015	-2.144	-6.8382	-7.6156	-0.74752	-0.42098	-0.33527	1.205	-1.8819	0.29731	-0.11189	0.0044655	0.45853	0.11135	0
								Coelophysis	Non-averostran Neotheropoda	CM 81765	Hendrickx et al., 2015	-2.5408	-5.0498	-4.3116	-1.9598	-0.12524	-0.54618	1.5328	-1.5835	0.5186	-0.057496	-0.082416	0.41194	0.21817	0
								Coelophysis	Non-averostran Neotheropoda	CM 81765	Hendrickx et al., 2015	-1.6838	-5.4052	-6.4437	-0.71468	-0.61143	-0.47926	0.21771	-1.1461	0.095689	0.112	0.08939	0.92444	-0.15193	0
								Coelophysis	Non-averostran Neotheropoda	CM 81765	Hendrickx et al., 2015	-1.5645	-5.4878	-7.26	-1.1647	-0.84015	-0.9513	-0.69551	0.68377	0.92904	-0.54484	-1.2388	-0.36026	0.986	0
								Coelophysis	Non-averostran Neotheropoda	CM 81765	Hendrickx et al., 2015	-2.441	-2.8528	-7.7256	-0.09141	-2.5624	1.1433	0.48683	-0.33016	3.136	0.78137	-0.42953	-1.2805	0.59845	0
								Coelophysis	Non-averostran Neotheropoda	CM 81765	Hendrickx et al., 2015	-1.9721	-4.4065	-5.7193	-0.32062	-0.43605	-0.72977	-0.6146	0.32127	0.6333	0.94211	0.30158	-0.33663	0.1091	0
								Coelophysis	Non-averostran Neotheropoda	CM 81765	Hendrickx et al., 2015	-2.1762	-4.5233	-6.9627	0.46406	-0.15538	-0.45375	-0.73572	0.87578	0.27101	1.2758	0.76963	-0.48706	-0.16528	0
								Coelophysis	Non-averostran Neotheropoda	CM 81765	Hendrickx et al., 2015	-1.8144	-5.1353	-7.0754	0.30017	-0.14983	-0.7818	-0.78439	0.76146	0.090708	1.1781	0.72418	-0.32887	-0.13893	0
								Coelophysis	Non-averostran Neotheropoda	CM 81765	Hendrickx et al., 2015	-2.2063	-5.4895	-8.3741	1.0558	-0.13531	0.013372	-0.026242	-0.22316	0.38638	0.65468	0.39405	-0.70232	0.085589	0
								Coelophysis	Non-averostran Neotheropoda	CM 81765	Hendrickx et al., 2015	-2.4768	-4.4874	-8.6573	0.50316	1.6715	0.51278	0.62814	1.4266	-2.27	-1.1923	0.034536	1.0906	-0.44216	0
								Coelophysis	Non-averostran Neotheropoda	CM 81765	Hendrickx et al., 2015	-2.2573	-5.1313	-8.67	1.7036	0.56251	-0.24128	-0.95047	1.3984	0.44758	0.18989	-0.40303	-2.0372	0.88509	0
								Coelophysis	Non-averostran Neotheropoda	CM 81765	Hendrickx et al., 2015	-1.1284	-4.5214	-9.4846	4.4473	2.1258	0.76089	-1.9918	-0.4508	-3.1083	-1.9386	-0.63574	1.235	-0.36678	0
								Coelophysis	Non-averostran Neotheropoda	CM 81765	Hendrickx et al., 2015	-2.5082	-6.0941	-11.252	1.2601	-0.082966	0.21337	-0.2855	1.65	-0.37857	1.2286	1.2211	-0.29514	-0.56075	0
								Coelophysis	Non-averostran Neotheropoda	CM 81765	Hendrickx et al., 2015	-2.4589	-4.9195	-11.053	1.0178	1.1944	0.90398	0.2197	1.9625	-2.5112	-0.93742	0.39797	1.6162	-0.89543	0
								Coelophysis	Non-averostran Neotheropoda	CM 81765	Hendrickx et al., 2015	-3.6488	-3.3508	-10.211	2.4462	0.8397	3.3545	3.9426	-1.7678	0.008138	-1.2779	0.050428	-0.82815	-0.069592	0
								Coelophysis	Non-averostran Neotheropoda	CM 81765	Hendrickx et al., 2015	-3.4594	-5.9429	-7.0758	-1.2873	0.42513	0.18558	1.9131	-1.2199	0.10775	-0.77713	-0.4183	0.21616	0.36466	0
								Coelophysis	Non-averostran Neotheropoda	CM 81765	Hendrickx et al., 2015	-2.3241	-4.6297	-7.3144	0.74248	2.3533	0.32872	1.2683	0.57376	-2.1566	-1.6574	-0.37629	0.24787	0.1079	0
								Dilophosaurus	Non-averostran Neotheropoda	UCMP 37303	Smith et al., 2005	0.68137	-0.17168	-0.17385	0.62275	0.20362	-0.55362	-0.84666	0.88496	-0.39904	0.48948	0.35835	-0.29922	-0.1451	0
								Dilophosaurus	Non-averostran Neotheropoda	UCMP 37303	Smith et al., 2005	0.65863	-0.16661	-0.0798	0.39785	0.077687	-0.41385	-0.38824	0.54307	-0.16194	0.28806	0.18541	-0.37433	-0.016971	0
								Dilophosaurus	Non-averostran Neotheropoda	UCMP 37303	Smith et al., 2005	0.86577	-0.35348	-0.2643	-1.0351	-0.46365	-0.94555	-1.0072	1.6342	0.60905	-0.98397	-1.5788	-0.7426	1.1124	0
								Dilophosaurus	Non-averostran Neotheropoda	UCMP 37303	Smith et al., 2005	0.78247	-0.021749	-0.28517	0.65619	-0.028836	-0.45548	-0.87751	0.8218	-0.28266	0.54397	0.38157	-0.20901	-0.2038	0
								Dracovenator	Non-averostran Neotheropoda	BP/1/5243	Young et al., 2019 (C.H. pers. measurements)	0.45282	0.58607	-0.10504	-0.14803	-1.0178	0.50715	-0.59284	-3.0281	-0.35472	-1.2645	-0.77174	2.4709	-0.51554	0
								Liliensternus	Non-averostran Neotheropoda	MBR 21751/4	Smith et al., 2005	-2.6136	-0.71068	-0.43781	-1.2697	-1.1791	-0.41811	-1.536	0.90839	1.9549	1.8782	0.36	-0.78812	0.13835	0
								Liliensternus	Non-averostran Neotheropoda	MBR 21751/3	Smith et al., 2005	-1.867	-1.2704	-0.19013	-0.79298	-0.53193	-0.64232	-1.6044	0.069148	0.62054	1.3755	0.52442	0.30945	-0.29706	0
								Liliensternus	Non-averostran Neotheropoda	MBR 21751/8	Smith et al., 2005	-2.1758	-1.4016	0.43621	0.84994	0.62072	-0.37004	-1.2912	-1.1477	0.44831	1.1374	0.44349	-0.77445	0.054751	0
								Liliensternus	Non-averostran Neotheropoda	MBR 21751/8	Smith et al., 2005	-1.7731	-0.68268	-0.090396	0.079313	-0.36567	-0.029845	-1.2816	-0.83256	0.57857	0.89056	0.27829	0.25913	-0.24729	0
								Liliensternus	Non-averostran Neotheropoda	MBR 21751/8	Smith et al., 2005	-1.5123	-0.53541	-0.44118	-0.096883	-0.70186	-0.24962	-1.8514	0.022681	0.5581	1.2694	0.49343	0.44413	-0.42888	0
								Liliensternus	Non-averostran Neotheropoda	MBR 21751/8	Smith et al., 2005	-2.1649	-1.2873	0.11571	-0.04827	-0.042771	-0.36804	-1.4261	-0.82098	0.53454	1.1095	0.38758	0.028972	-0.16464	0
								Liliensternus	Non-averostran Neotheropoda	MBR 21751/9	Smith et al., 2005	-2.234	-1.9687	0.091805	-1.7566	-0.58916	-0.80128	-1.0623	-0.51284	0.73425	1.049	0.26458	0.62271	-0.16077	0
								Genyodectes	Non-abelisauroid Ceratosauria	MLP 26-39	Hendrickx et al., 2015	1.0891	0.1321	-0.14225	-1.6633	-0.47119	-0.57107	1.4952	0.38517	0.21396	-0.45122	-0.284	0.30237	0.13929	0
								Genyodectes	Non-abelisauroid Ceratosauria	MLP 26-39	Hendrickx et al., 2015	1.4511	0.57506	-0.29514	-2.7721	-0.17996	0.52985	-0.98758	-0.45013	-0.56118	-0.2786	0.55786	-1.8481	0.12518	0
								Genyodectes	Non-abelisauroid Ceratosauria	MLP 26-39	Hendrickx et al., 2015	0.76267	0.28595	0.48216	-0.67133	0.5126	0.42454	0.89089	-1.5647	0.22668	0.14797	0.42204	-0.87496	0.024364	0
								Genyodectes	Non-abelisauroid Ceratosauria	MLP 26-39	Hendrickx et al., 2015	0.44521	-0.28297	-0.54216	-3.1331	-1.58	-0.77995	0.93685	0.56561	0.81815	-0.078958	-0.32403	1.1954	-0.050132	0
								Genyodectes	Non-abelisauroid Ceratosauria	MLP 26-39	Hendrickx et al., 2015	0.10353	0.15327	-0.10192	-0.4907	0.10887	-0.68912	-0.05448	0.69487	0.68542	-0.48076	-0.9537	-0.97393	0.85893	0
								Genyodectes	Non-abelisauroid Ceratosauria	MLP 26-39	Hendrickx et al., 2015	0.64334	-0.15968	0.27055	-0.43282	0.50437	-0.53944	-0.0065877	0.060966	1.07	0.62674	-0.26567	-0.16563	0.31	0
								Genyodectes	Non-abelisauroid Ceratosauria	MLP 26-39	Hendrickx et al., 2015	1.4458	0.34098	0.16677	-0.5912	0.64307	0.41785	-0.051044	-1.3377	-0.17489	0.034453	0.29369	-0.042493	-0.20955	0
								Genyodectes	Non-abelisauroid Ceratosauria	MLP 26-39	Hendrickx et al., 2015	0.90439	0.48455	0.1727	-1.1631	0.86205	-0.11938	-0.31355	0.47892	-0.16338	-0.23898	-0.18149	-0.77339	0.31093	0
								Genyodectes	Non-abelisauroid Ceratosauria	MLP 26-39	Hendrickx et al., 2015	1.0463	0.34203	0.076336	-1.0209	0.36338	0.36748	-0.10068	-1.0815	0.023672	0.13653	0.26396	0.15598	-0.23769	0
								Ceratosaurus	Non-abelisauroid Ceratosauria	NMNH 4735	Hendrickx et al., 2015	0.30663	0.90541	-0.21405	-2.1839	-0.65453	0.21624	-0.40295	-0.050201	-0.60463	-0.25165	0.53457	-0.8619	-0.15533	0
								Ceratosaurus	Non-abelisauroid Ceratosauria	NMNH 4735	Hendrickx et al., 2015	0.39186	0.72295	-0.17022	-1.7964	-0.14651	-0.00059511	-0.64781	0.44786	-0.23083	0.015829	0.28518	-0.76562	0.0037112	0
								Ceratosaurus	Non-abelisauroid Ceratosauria	NMNH 4735	Hendrickx et al., 2015	0.53176	0.57009	0.045352	-1.46	-0.21623	0.20321	-0.37263	-0.86099	-0.93148	-0.2981	0.68312	-1.0922	-0.16496	0
								Ceratosaurus	Non-abelisauroid Ceratosauria	NMNH 4735	Hendrickx et al., 2015	0.44351	0.97063	0.0066761	-1.0486	0.25697	0.11972	0.12719	0.37478	-0.037937	-0.015795	0.052744	0.19098	-0.14728	0
								Ceratosaurus	Non-abelisauroid Ceratosauria	NMNH 4735	Hendrickx et al., 2015	0.33885	1.0323	0.16712	-0.087539	0.014029	0.39435	-0.26591	-1.2878	-1.1677	-0.52728	0.56924	-0.85336	-0.2499	0
								Ceratosaurus	Non-abelisauroid Ceratosauria	NMNH 4735	Hendrickx et al., 2015	-0.2529	0.67237	-0.26325	-0.30907	-1.3453	-1.1896	0.064884	1.1438	0.40444	0.1465	-0.50429	2.7866	-0.53182	0
								Ceratosaurus	Non-abelisauroid Ceratosauria	BYU 881 12893	Young et al., 2019 (C.H. pers. measurements)	1.6775	1.5285	-0.37364	-2.7279	0.0062613	1.0134	-0.50702	0.12967	-0.17643	-0.93129	-0.21339	-1.762	0.45104	0
								Ceratosaurus	Non-abelisauroid Ceratosauria	BYU 881 12893	Young et al., 2019 (C.H. pers. measurements)	1.4551	1.1437	-0.15918	-2.6503	-0.12417	1.0439	-0.013867	-0.95057	-0.93533	-0.65475	0.70672	-1.5246	-0.12196	0
								Ceratosaurus	Non-abelisauroid Ceratosauria	UMNH VP 5278	Young et al., 2019 (C.H. pers. measurements)	1.4053	-0.50252	0.57495	0.63239	-2.1646	3.7711	-0.82296	1.8875	-0.77158	3.36	-2.1689	1.0044	0.40306	0
								Ceratosaurus	Non-abelisauroid Ceratosauria	UMNH VP 5278	Young et al., 2019 (C.H. pers. measurements)	1.5126	-0.87833	0.88835	0.53304	-0.87371	3.2147	-0.090386	1.4286	-0.13346	3.0256	-2.1977	1.1146	0.55646	0
								Ceratosaurus	Non-abelisauroid Ceratosauria	UMNH VP 5278	Young et al., 2019 (C.H. pers. measurements)	1.4027	-1.4554	1.4011	-0.36537	-2.3607	5.3753	-0.014742	0.75028	-1.8398	3.4226	-2.497	-0.51515	0.92026	0
								Ceratosaurus	Non-abelisauroid Ceratosauria	UMNH VP 5278	Young et al., 2019 (C.H. pers. measurements)	1.108	-0.62651	1.06	0.55464	-1.445	4.0428	0.057686	1.1523	-1.1404	2.731	-2.3887	1.0701	0.51018	0
								Ceratosaurus	Non-abelisauroid Ceratosauria	UMNH VP 5278	Young et al., 2019 (C.H. pers. measurements)	1.3338	-0.83068	1.3786	0.0075697	-1.7771	5.2575	0.049007	0.89921	-2.2481	2.9122	-2.273	-0.74818	0.83171	0
								Ceratosaurus	Non-abelisauroid Ceratosauria	UMNH VP 5278	Young et al., 2019 (C.H. pers. measurements)	2.0431	0.31507	-0.10755	-2.3153	0.42037	0.47471	-0.3107	-0.54218	-0.091453	-0.060554	0.29963	-0.84082	0.043281	0
								Ceratosaurus	Non-abelisauroid Ceratosauria	UMNH VP 5278	Young et al., 2019 (C.H. pers. measurements)	2.1015	0.51372	-0.24057	-3.0604	0.35398	0.86784	-0.38332	-0.69749	-0.34734	-0.2127	0.46255	-0.81285	-0.10363	0
								Ceratosaurus	Non-abelisauroid Ceratosauria	UMNH VP 5278	Young et al., 2019 (C.H. pers. measurements)	1.446	0.99214	-0.34039	-2.598	-0.36614	1.1495	-0.55608	-1.4571	-0.92685	-0.42603	0.85491	-0.94277	-0.39912	0
								Ceratosaurus	Non-abelisauroid Ceratosauria	UMNH VP 5278	Young et al., 2019 (C.H. pers. measurements)	1.1086	0.62583	-0.019888	-1.0656	-0.062317	0.60547	-0.38518	-1.5365	-0.50551	-0.12333	0.61848	-0.85567	-0.21812	0
								Ceratosaurus	Non-abelisauroid Ceratosauria	UMNH VP 5278	Young et al., 2019 (C.H. pers. measurements)	1.6453	-0.91792	1.0625	1.7661	-1.8457	4.4252	-1.4413	-1.8397	-2.2559	1.0835	-3.1439	1.4394	0.61666	0
								Ceratosaurus	Non-abelisauroid Ceratosauria	UMNH VP 5278	Young et al., 2019 (C.H. pers. measurements)	1.2341	0.80623	-0.22483	-1.0439	-0.11582	0.67937	-0.92854	-1.4469	-0.79812	-0.30172	0.50752	-0.25653	-0.39195	0
								Ceratosaurus	Non-abelisauroid Ceratosauria	UMNH VP 5278	Young et al., 2019 (C.H. pers. measurements)	0.57304	1.1243	-0.31654	-0.57675	-0.69824	0.68937	-0.96927	-1.6231	-0.5596	-0.4599	0.21259	0.32056	-0.44234	0
								Ceratosaurus	Non-abelisauroid Ceratosauria	UMNH VP 5278	Smith et al., 2005	1.5293	1.1362	-0.95358	1.4456	-1.2057	0.020567	-1.0572	1.2397	0.8183	1.414	0.75803	-0.95539	-0.27949	0
								Ceratosaurus	Non-abelisauroid Ceratosauria	UMNH VP 5278	Smith et al., 2005	1.6402	0.65864	-0.39826	1.5663	-1.0038	0.40877	-0.014989	-1.0011	0.70727	0.33258	0.15068	-0.52658	-0.072083	0
								Ceratosaurus	Non-abelisauroid Ceratosauria	UMNH VP 5278	Smith et al., 2005	1.5343	1.1244	-0.4207	0.62009	-0.21056	0.13464	0.07303	1.1425	-0.32614	-0.10068	0.10521	-0.1647	-0.16999	0
								Ceratosaurus	Non-abelisauroid Ceratosauria	UMNH VP 5278	Smith et al., 2005	1.1585	0.75134	-0.33785	1.1674	-0.95687	0.49562	0.2881	-0.73838	0.87521	0.4119	0.18645	-0.68046	-0.02777	0
								Ceratosaurus	Non-abelisauroid Ceratosauria	UMNH VP 5278	Smith et al., 2005	1.1273	1.6457	-0.61734	0.57566	-0.86094	0.54246	0.23997	1.1017	0.70599	0.19683	-0.0061606	-0.77457	0.052146	0
								Ceratosaurus	Non-abelisauroid Ceratosauria	UMNH VP 5278	Smith et al., 2005	1.6144	0.77028	-0.32375	0.11632	-0.56629	0.14519	0.58906	0.47288	-0.06163	-0.19976	0.03714	0.060714	-0.15376	0
								Ceratosaurus	Non-abelisauroid Ceratosauria	UMNH VP 5278	Smith et al., 2005	1.5466	0.31365	-0.5388	-1.5124	-1.39	-0.31295	0.50288	1.1829	0.61468	-0.2647	-0.41774	0.20927	0.15097	0
								Ceratosaurus	Non-abelisauroid Ceratosauria	UMNH VP 5278	Smith et al., 2005	1.852	-0.31824	-0.40721	-1.8122	-1.5386	-0.57306	0.79357	0.66307	0.6205	-0.17306	-0.28045	0.38837	0.093564	0
								Ceratosaurus	Non-abelisauroid Ceratosauria	UMNH VP 5278	Smith et al., 2005	1.2856	-0.18103	-0.59609	-1.694	-1.5858	-0.53994	0.098938	0.97532	0.62796	0.16829	-0.12159	0.55139	-0.07168	0
								Ceratosaurus	Non-abelisauroid Ceratosauria	UMNH VP 5278	Smith et al., 2005	0.69558	0.56217	-0.5627	-0.78558	-1.207	0.12378	0.12323	0.55771	0.41984	0.17597	0.070081	0.57596	-0.29719	0
								Berberosaurus	Non-abelisauroid Ceratosauria	MNHN Pt369	Hendrickx et al., 2015	0.12756	0.15513	-0.1169	-1.8937	-1.2735	-0.50595	-0.41225	-0.26156	-0.070466	0.096343	0.46983	-0.97171	0.02457	0
								Berberosaurus	Non-abelisauroid Ceratosauria	MNHN Pt369	Hendrickx et al., 2015	0.64175	0.16609	0.25934	-1.6057	-0.056983	-0.19683	0.30801	-0.45742	-0.1729	-0.24671	0.17192	-0.86857	0.17272	0
								Noasaurus	Noasauridae	PVL 4061	Hendrickx et al., 2015	-3.7512	1.4792	-0.25085	1.476	1.7139	0.4876	-2.0529	1.0293	-0.68863	1.0256	0.69524	0.052717	-0.61075	0
								Noasaurus	Noasauridae	PVL 4061	Hendrickx et al., 2015	-4.5635	-0.097674	0.71721	1.3721	-2.553	-2.3964	0.55054	0.20536	0.42545	0.52902	0.20476	-0.44984	0.15439	0
								Masiakasaurus	Noasauridae	UA 9128 (most mesial tooth)	Hendrickx et al., 2015	-4.6675	1.1222	1.4672	2.179	-0.5624	-0.61737	3.9014	-1.1103	0.5168	0.12532	0.06674	2.0832	-0.59196	0
								Masiakasaurus	Noasauridae	FMNH PR 2696 (small)	Hendrickx et al., 2015	-4.3754	-2.6648	3.702	1.2822	-0.51308	1.7686	3.1311	1.5999	-4.9113	1.1187	-2.3049	0.47454	0.85153	0
								Masiakasaurus	Noasauridae	FMNH PR 2182	Hendrickx et al., 2015	-4.6286	-3.3737	2.8157	1.0601	-2.0875	-0.77486	2.1193	0.065443	-1.4734	1.4312	-1.652	-0.47526	1.1658	0
								Masiakasaurus	Noasauridae	FMNH PR 2471	Hendrickx et al., 2015	-3.7785	-3.3885	3.0789	1.7383	-1.4897	0.64851	2.2312	-0.29852	-1.5452	2.1314	-1.8717	-0.95383	1.312	0
								Masiakasaurus	Noasauridae	UA 8680	Hendrickx et al., 2015	-4.3667	-4.1085	2.6321	0.65917	-3.3305	0.50812	1.5766	1.7735	-1.6012	2.7868	-3.3978	4.0763	0.6272	0
								Masiakasaurus	Noasauridae	UA 8680	Hendrickx et al., 2015	-3.7419	-0.79254	1.3554	2.0575	-1.8206	-1.1705	-0.50501	0.73526	-3.5749	-1.4155	-2.4264	4.1284	-0.14359	0
								Masiakasaurus	Noasauridae	FMNH PR 2221	Hendrickx et al., 2015	-3.5244	0.66485	0.26015	-0.23796	-2.8927	-1.0214	0.34446	-0.71553	0.074026	0.12163	0.64228	-1.2427	-0.019088	0
								Masiakasaurus	Noasauridae	FMNH PR 2476	Hendrickx et al., 2015	-4.8442	0.10651	1.2554	0.47642	-0.42422	-2.3412	0.91433	0.93565	-2.7879	-1.4648	-0.062839	1.632	-0.43866	0
								Masiakasaurus	Noasauridae	FMNH PR 2201	Hendrickx et al., 2015	-2.7828	0.97166	0.26044	0.016661	-2.1254	-0.99609	0.57863	0.26219	0.49	0.084264	0.13254	-1.0655	0.2316	0
								Masiakasaurus	Noasauridae	UA 9091	Hendrickx et al., 2015	-4.8922	-1.0106	0.8571	0.61995	-2.8563	-2.7795	-0.0073238	-0.39405	0.070651	0.56008	0.59228	-1.722	0.37796	0
								Masiakasaurus	Noasauridae	FMNH PR 2696 (big)	Hendrickx et al., 2015	-3.6294	0.76524	0.67819	-0.17139	-2.3567	-0.72747	2.2778	-1.1069	0.58173	-0.10266	0.17608	0.56755	-0.23525	0
								Masiakasaurus	Noasauridae	98312-1	Smith et al., 2005	-2.5085	0.53206	0.36867	1.8277	1.0221	0.8092	-0.52752	-0.73289	0.48898	0.78219	0.37073	-1.3892	0.082445	0
								Masiakasaurus	Noasauridae	95345-1	Smith et al., 2005	-2.6428	-0.89983	-0.17024	-0.23467	-0.32563	-0.18319	-1.9142	-0.44212	0.58816	1.2797	0.44672	0.44927	-0.37489	0
								Masiakasaurus	Noasauridae	99016	Smith et al., 2005	-2.149	-1.321	0.45066	-1.1459	-0.22011	0.11375	0.29478	-2	0.39058	0.28811	0.1723	0.94032	-0.30743	0
								Masiakasaurus	Noasauridae	95358	Smith et al., 2005	-3.9727	1.2811	0.54776	0.9528	1.2213	1.7434	0.46028	-1.2037	0.2469	0.10816	0.17571	-0.4054	-0.1934	0
								Masiakasaurus	Noasauridae	95244-1	Smith et al., 2005	-3.9465	1.3806	0.23649	0.010208	0.60247	1.6656	0.3337	-0.64538	0.39026	0.13105	0.11523	0.19539	-0.33566	0
								Masiakasaurus	Noasauridae	98313-1	Smith et al., 2005	-1.7427	-0.00073873	-0.17536	0.13353	-0.012321	0.21804	-1.2566	-0.1953	-0.020058	0.5	0.21363	0.6436	-0.41288	0
								Masiakasaurus	Noasauridae	98203	Smith et al., 2005	-3.2965	-0.44993	0.37103	-1.1876	-0.83741	0.83456	1.0302	-1.8579	2.1395	0.98252	0.19599	-0.64615	0.15107	0
								Masiakasaurus	Noasauridae	93086-4	Smith et al., 2005	-2.7888	0.3563	0.15877	-0.57264	0.79104	0.53412	-0.45393	0.29986	-0.54223	0.0076869	0.12377	0.85332	-0.4411	0
								Masiakasaurus	Noasauridae	95435	Smith et al., 2005	-2.8395	-0.077017	-0.11651	0.089217	0.053978	0.2555	-1.3891	0.03894	0.53635	1.1844	0.50295	-0.023676	-0.32891	0
								Masiakasaurus	Noasauridae	96068-4	Smith et al., 2005	-2.9761	0.0078016	-0.2897	-0.92515	-1.0382	0.57115	-0.73268	-0.53009	1.4735	1.1641	0.289	0.25589	-0.27308	0
								Arcovenator	Abelisauridae	MHNA.PV.2011.12.15 (holotype)	Young et al., 2019 (C.H. pers. measurements)	0.22693	0.14034	0.24117	-0.6023	-0.20472	0.022647	0.64096	-1.2641	0.80626	0.39907	0.033467	0.83319	-0.22995	0
								Arcovenator	Abelisauridae	MHNA.PV.2011.12.187 (referred)	Young et al., 2019 (C.H. pers. measurements)	0.78113	-0.11022	0.17914	-1.7011	-0.29693	0.033651	0.42479	-1.1726	0.56101	0.29881	0.30159	-0.4274	0.011305	0
								Abelisaurus	Abelisauridae	MC 1	Hendrickx et al., 2015	-1.0981	1.7382	0.02889	1.3187	-0.42337	-0.0016307	-0.3978	-0.093664	-0.54488	-0.1361	0.203	0.019628	-0.32342	0
								Abelisaurus	Abelisauridae	MC 5	Hendrickx et al., 2015	-0.50357	1.7668	0.12961	0.41678	-0.30917	0.68625	0.3062	-1.0111	-0.44813	-0.34588	0.38759	-0.66832	-0.23328	0
								Abelisaurus	Abelisauridae	MC 267	Hendrickx et al., 2015	-1.3016	2.7672	-0.48053	1.7213	-1.0715	0.40997	-1.1746	0.32605	-0.62088	-0.065438	0.35363	-0.073639	-0.52738	0
								Abelisaurus	Abelisauridae	MC 689	Hendrickx et al., 2015	0.8673	1.6063	-0.8612	0.7251	-0.61763	0.10374	-1.8709	0.54724	0.55868	0.42953	-0.44464	2.134	-0.58526	0
								Abelisaurus	Abelisauridae	MC 709 (230)	Hendrickx et al., 2015	0.76342	0.48251	-0.19171	0.60945	0.15491	-0.22538	-1.4425	-0.21677	0.11577	0.85647	0.46601	-0.31232	-0.23079	0
								Rugops	Abelisauridae	MNN IGU1	Smith & Lamanna, 2006	-0.98202	1.3261	-0.92718	0.06561	-0.7894	0.38321	-1.4373	1.7776	0.31076	1.2558	0.73841	0.37842	-0.70577	0
								Indosuchus	Abelisauridae	AMNH 1753	Hendrickx et al., 2015	0.055321	2.4222	-0.22767	2.302	1.0019	0.36879	-0.032661	1.8971	1.7518	1.2811	-0.43638	0.84654	-0.11553	0
								Indosuchus	Abelisauridae	AMNH 1753	Hendrickx et al., 2015	0.81954	1.327	0.053533	1.2678	0.8743	0.38466	-0.036756	-0.19138	0.55318	0.35213	-0.24462	0.81546	-0.2125	0
								Indosuchus	Abelisauridae	AMNH 1753	Hendrickx et al., 2015	0.57006	1.5748	-0.14107	0.55273	0.62388	0.45534	-0.48232	0.16925	-0.13706	0.084203	-0.022394	0.74237	-0.37886	0
								Indosuchus	Abelisauridae	AMNH 1753	Hendrickx et al., 2015	0.71351	1.6211	-0.027097	0.78367	1.0105	0.28795	-0.24263	1.0847	0.8203	0.50046	-0.24808	-0.71232	0.26118	0
								Indosuchus	Abelisauridae	AMNH 1753	Smith et al., 2005	0.91859	0.73942	-0.64274	0.2608	-0.64016	0.15532	-0.93748	0.36684	-0.58993	-0.25446	-0.049756	1.3061	-0.56125	0
								Indosuchus	Abelisauridae	AMNH 1753	Smith et al., 2005	1.1834	0.52422	-0.27353	1.9973	-0.038805	0.20048	-0.9153	-0.61332	-0.34226	-0.0015897	0.065498	-0.05442	-0.20852	0
								Indosuchus	Abelisauridae	AMNH 1753	Smith et al., 2005	0.9244	0.22846	-0.12238	0.96939	0.40384	-0.12646	-0.63988	0.19091	-0.98879	-0.2422	0.10442	0.46374	-0.33185	0
								Indosuchus	Abelisauridae	AMNH 1753	Smith et al., 2005	1.1396	-0.25232	-0.020369	1.384	0.33996	-0.44804	-0.68369	0.059825	-0.42449	0.33141	0.30475	-0.53597	-0.060625	0
								Indosuchus	Abelisauridae	AMNH 1753	Smith et al., 2005	0.49589	0.39883	0.28803	0.92032	1.3064	-0.047366	0.14641	0.67784	-1.273	-0.49813	0.079641	-0.19357	-0.10087	0
								Indosuchus	Abelisauridae	AMNH 1753	Smith et al., 2005	0.83446	0.99897	-0.010934	1.2347	0.39616	0.60206	0.35897	-0.36991	-0.75994	-0.552	0.029453	0.26218	-0.30305	0
								Chenanisaurus	Abelisauridae	OCP 457	Longrich et al., 2017	1.1634	1.239	-0.17064	0.60115	-0.2016	0.58923	0.94265	0.22866	-0.049224	-0.29595	0.049524	-0.26807	-0.11391	0
								Chenanisaurus	Abelisauridae	OCP 458	Longrich et al., 2017	1.5843	-0.73617	0.2572	0.86424	0.20252	-0.42867	0.27811	-0.99515	-0.51436	-0.14871	0.15962	-0.068526	-0.07153	0
								Chenanisaurus	Abelisauridae	WDC-CCPM-005	Buffetaut et al., 2005	0.68702	0.74329	-0.29591	-0.35906	-0.64636	0.36008	0.60581	0.21495	0.048768	-0.16427	0.044105	0.46701	-0.28083	0
								Majungasaurus	Abelisauridae	FMNH PR 2100	Young et al., 2019 (C.H. pers. measurements)	0.0092964	2.2365	-0.021791	2.3443	0.66685	0.11885	-0.013983	0.99811	0.17625	0.1891	-0.33884	1.0372	-0.30389	0
								Majungasaurus	Abelisauridae	FMNH PR 2100	Young et al., 2019 (C.H. pers. measurements)	0.74456	1.8794	0.00095009	1.8097	0.60016	0.65591	-0.1307	-0.72981	-0.085854	-0.39729	-0.45645	1.1983	-0.33516	0
								Majungasaurus	Abelisauridae	FMNH PR 2100	Young et al., 2019 (C.H. pers. measurements)	0.25601	2.6755	-0.65081	1.2814	-0.77867	0.83876	-0.71336	-0.17396	0.36678	-0.50195	-0.80402	2.228	-0.54519	0
								Majungasaurus	Abelisauridae	FMNH PR 2100	Young et al., 2019 (C.H. pers. measurements)	0.72648	2.3873	-0.51965	1.144	-1.0389	1.8632	-0.89863	-3.8692	-0.30336	-2.6389	-2.0979	4.5226	-0.68733	0
								Majungasaurus	Abelisauridae	FMNH PR 2100	Young et al., 2019 (C.H. pers. measurements)	0.54602	1.6158	-0.15924	-0.6156	0.1696	0.71373	-0.092163	-0.023112	-0.14124	-0.01214	0.29915	-0.3279	-0.23766	0
								Majungasaurus	Abelisauridae	FMNH PR 2100	Young et al., 2019 (C.H. pers. measurements)	0.61082	1.7077	-0.1246	-0.47879	-0.01845	0.92663	0.029303	-0.64053	-0.27676	-0.16107	0.43034	-0.66911	-0.24487	0
								Majungasaurus	Abelisauridae	FMNH PR 2100	Young et al., 2019 (C.H. pers. measurements)	0.33658	2.3764	-0.48709	-0.77198	-0.33753	0.88881	-0.28455	0.83785	0.082708	0.10484	0.35665	-0.81049	-0.18782	0
								Majungasaurus	Abelisauridae	FMNH PR 2100	Young et al., 2019 (C.H. pers. measurements)	0.49507	2.0023	-0.23452	-0.70319	-0.22651	0.97119	0.059377	-0.22136	-0.23843	-0.17826	0.44078	-0.83102	-0.22163	0
								Majungasaurus	Abelisauridae	FMNH PR 2100	Young et al., 2019 (C.H. pers. measurements)	-1.1524	2.4537	0.032341	2.3505	-0.1364	0.16462	0.47253	0.59264	0.50437	0.031961	-0.48828	1.3297	-0.32032	0
								Majungasaurus	Abelisauridae	FMNH PR 2100	Young et al., 2019 (C.H. pers. measurements)	-0.11898	1.6291	0.21668	0.16298	0.43498	0.48025	0.55757	0.061991	0.067104	-0.1012	0.076641	-0.72338	0.044637	0
								Majungasaurus	Abelisauridae	FMNH PR 2100	Young et al., 2019 (C.H. pers. measurements)	-0.14723	1.8191	-0.074388	-0.01404	-0.041269	0.46912	-0.063208	0.23423	-0.31758	-0.049024	0.35289	-0.63345	-0.19241	0
								Majungasaurus	Abelisauridae	FMNH PR 2100	Young et al., 2019 (C.H. pers. measurements)	-0.49144	1.9825	-0.094208	0.038798	-0.1554	0.47327	-0.20233	0.44492	-0.28489	0.020885	0.44827	-1.2573	-0.073357	0
								Majungasaurus	Abelisauridae	FMNH PR 2100	Young et al., 2019 (C.H. pers. measurements)	-0.56844	1.8812	-0.14663	0.1736	-0.45631	0.53052	-0.35192	-0.017187	-0.11693	0.22361	0.6049	-1.3672	-0.12987	0
								Majungasaurus	Abelisauridae	FMNH PR 2100	Young et al., 2019 (C.H. pers. measurements)	-0.80694	1.8182	-0.29538	-0.52826	-0.69011	0.13774	-1.2335	1.0838	0.75327	-0.37134	-0.62584	-2.4618	0.91214	0
								Majungasaurus	Abelisauridae	FMNH PR 2100	Young et al., 2019 (C.H. pers. measurements)	-0.65155	1.7019	-0.08873	0.27108	-0.44475	0.45065	-0.46602	-0.40378	-0.52667	-0.032849	0.55873	-0.8031	-0.28715	0
								Majungasaurus	Abelisauridae	FMNH PR 2100	Young et al., 2019 (C.H. pers. measurements)	-0.59011	2.2036	0.12065	1.1965	0.0025752	0.72027	0.99132	-0.37512	0.43884	-0.17041	-0.29175	1.1281	-0.36321	0
								Majungasaurus	Abelisauridae	FMNH PR 2100	Young et al., 2019 (C.H. pers. measurements)	-0.097907	2.0436	-0.084005	0.98406	-0.096977	0.62651	-0.048804	-0.34278	-0.15457	-0.1452	0.098258	0.10372	-0.31589	0
								Majungasaurus	Abelisauridae	FMNH PR 2100	Young et al., 2019 (C.H. pers. measurements)	0.1389	2.2227	-0.36827	0.85022	-0.62167	0.82102	-0.72843	-0.76688	-0.45679	-0.41274	0.11327	0.15987	-0.42497	0
								Majungasaurus	Abelisauridae	FMNH PR 2100	Young et al., 2019 (C.H. pers. measurements)	-0.0048794	2.2717	-0.25909	0.76764	-0.13307	0.50405	-0.51842	0.38888	-0.72948	-0.12307	0.41976	-0.31774	-0.4077	0
								Majungasaurus	Abelisauridae	FMNH PR 2100	Young et al., 2019 (C.H. pers. measurements)	-0.088742	1.7781	0.0034572	0.26534	-0.11284	0.51227	0.067916	-0.29432	-0.49572	-0.23765	0.34592	-0.47582	-0.25329	0
								Majungasaurus	Abelisauridae	FMNH PR 2100	Young et al., 2019 (C.H. pers. measurements)	-0.16419	1.4468	0.12005	0.26086	0.22527	0.37837	0.13156	-0.043453	0.23293	0.17593	0.1931	-0.89932	0.043483	0
								Majungasaurus	Abelisauridae	FMNH PR 2100	Young et al., 2019 (C.H. pers. measurements)	-0.46003	1.6016	-0.051297	-0.42717	-0.10726	0.28199	-0.18225	0.61424	0.23429	0.034272	0.072724	-1.1957	0.18776	0
								Majungasaurus	Abelisauridae	FMNH PR 2100	Young et al., 2019 (C.H. pers. measurements)	-0.65597	1.5527	0.047284	0.38751	-0.29699	0.37408	-0.30423	-0.57279	-0.61796	-0.13853	0.51517	-0.83482	-0.23794	0
								Majungasaurus	Abelisauridae	FMNH PR2008	Smith et al., 2005	0.093848	0.19885	0.30679	0.24517	0.40094	0.23799	0.93433	-0.27737	-0.12117	-0.18536	0.079175	-0.41845	0.028973	0
								Majungasaurus	Abelisauridae	UA 8716	Smith et al., 2005	-0.023898	0.86124	0.12741	0.80361	0.2349	0.73144	0.8107	-0.53544	-0.04626	-0.16005	0.13598	-0.28173	-0.13871	0
								Majungasaurus	Abelisauridae	UA 8716	Smith et al., 2005	-0.21013	0.69984	0.1166	-0.042937	0.2193	0.42943	0.82581	0.30314	0.064712	-0.25084	-0.082559	-0.40414	0.07301	0
								Majungasaurus	Abelisauridae	FMNH PR2100	Smith et al., 2005	-0.014024	1.0011	0.4475	0.76308	0.74777	0.76048	1.6339	-0.18353	0.064129	-0.42407	-0.051237	-1.1808	0.26647	0
								Majungasaurus	Abelisauridae	FMNH PR2100	Smith et al., 2005	0.24475	1.8716	-0.23434	1.3108	-0.97267	2.7815	-1.1642	-0.19607	-1.1467	-1.0776	12.859	6.9381	23.489	0
								Majungasaurus	Abelisauridae	FMNH PR2100	Smith et al., 2005	0.3857	1.3434	-0.47027	-0.64688	-0.79883	0.70014	0.6871	0.57534	0.022972	-0.29424	-0.0034806	0.81952	-0.42258	0
								Majungasaurus	Abelisauridae	FMNH PR2100	Smith et al., 2005	0.47733	1.1204	-0.40065	-0.44993	-0.86489	0.66295	0.73825	0.15649	0.20118	-0.18879	0.030856	0.63121	-0.36297	0
								Majungasaurus	Abelisauridae	FMNH PR2100	Smith et al., 2005	-0.56979	1.8232	-0.34169	-0.39442	-0.71534	1.7199	0.46704	1.1883	-0.408	0.23333	6.5303	3.2708	9.8551	0
								Majungasaurus	Abelisauridae	FMNH PR2100	Smith et al., 2005	0.44347	0.94412	-0.48863	-0.80641	-0.82076	0.23427	0.29338	1.1544	0.32122	-0.043209	-0.090683	0.23521	-0.12939	0
								Majungasaurus	Abelisauridae	FMNH PR2100	Smith et al., 2005	0.32223	1.0918	-0.37736	-0.89492	-0.86109	0.46763	0.80964	0.85217	0.57736	-0.2121	-0.22806	0.02507	0.0072908	0
								Majungasaurus	Abelisauridae	FMNH PR2100	Smith et al., 2005	-0.097293	1.3741	-0.70008	-0.86898	-1.227	0.76411	0.16322	0.57588	0.31004	-0.037024	0.017349	1.1351	-0.54221	0
								Majungasaurus	Abelisauridae	FMNH PR2100	Smith et al., 2005	-1.7625	1.0378	-0.37729	-0.35654	-0.21735	0.76877	-0.62434	0.41532	-0.084143	0.13878	0.11369	1.0178	-0.56082	0
								Majungasaurus	Abelisauridae	FMNH PR2100	Smith et al., 2005	-0.90779	1.4954	0.2193	1.1646	0.52331	1.3537	1.0679	-0.81101	0.0064735	-0.23222	0.15539	-0.37833	-0.19673	0
								Majungasaurus	Abelisauridae	FMNH PR2100	Smith et al., 2005	-0.14856	1.0642	-0.19806	0.37818	-0.271	0.56771	0.33171	0.43053	0.56092	0.16793	0.011546	-0.67625	0.062852	0
								Majungasaurus	Abelisauridae	FMNH PR2100	Smith et al., 2005	0.00032613	0.84414	-0.32943	0.1355	-0.39123	0.43107	-0.057667	0.32303	0.05565	0.10469	0.12946	0.27943	-0.30113	0
								Majungasaurus	Abelisauridae	FMNH PR2100	Smith et al., 2005	-0.38851	1.1851	-0.46359	0.52387	-0.49247	0.56859	-0.35136	0.67249	0.53388	0.58689	0.28101	-0.3597	-0.2109	0
								Majungasaurus	Abelisauridae	FMNH PR2100	Smith et al., 2005	-0.4922	1.0363	-0.4536	0.15317	-0.35927	0.30792	-0.47485	1.2883	0.48325	0.60081	0.21921	-0.49173	-0.10161	0
								Majungasaurus	Abelisauridae	FMNH PR2100	Smith et al., 2005	-0.53456	1.1008	-0.47984	0.3118	-0.26852	0.26106	-0.64163	1.5498	0.50267	0.72452	0.26575	-0.71242	-0.063155	0
								Majungasaurus	Abelisauridae	FMNH PR2100	Smith et al., 2005	-0.69463	1.1102	-0.53654	0.42377	-0.3645	0.28495	-0.78874	1.5347	0.64582	0.98766	0.41524	-0.79375	-0.12053	0
								Majungasaurus	Abelisauridae	FMNH PR2100	Smith et al., 2005	-1.2357	0.98631	-0.35928	0.47226	-0.43725	0.58329	-0.48112	0.57053	0.97673	0.90451	0.30564	-0.80912	-0.052639	0
								Majungasaurus	Abelisauridae	FMNH PR2100	Smith et al., 2005	-0.17613	1.7155	-0.046106	1.6323	0.17448	1.5253	0.46612	-1.482	-0.39387	-0.79188	-0.18009	0.59994	-0.40644	0
								Majungasaurus	Abelisauridae	FMNH PR2100	Smith et al., 2005	-0.090075	1.5321	-0.3989	0.77924	-0.25602	0.80658	-0.02798	0.51579	0.1675	0.17191	0.17826	-0.16285	-0.26722	0
								Majungasaurus	Abelisauridae	FMNH PR2100	Smith et al., 2005	-0.032768	1.2959	-0.39855	0.41755	-0.32754	0.72512	-0.076317	0.28983	-0.10638	-0.06954	0.087802	0.46332	-0.39979	0
								Majungasaurus	Abelisauridae	FMNH PR2100	Smith et al., 2005	-0.047818	0.95402	-0.17822	0.16501	-0.049087	0.56106	0.25636	0.21545	-0.28073	-0.20784	0.069349	0.42637	-0.33164	0
								Majungasaurus	Abelisauridae	FMNH PR2100	Smith et al., 2005	-0.15072	0.98064	-0.14709	0.59751	-0.065034	0.50039	0.19243	0.42626	0.39039	0.19325	0.067913	-0.71291	0.042913	0
								Majungasaurus	Abelisauridae	FMNH PR2100	Smith et al., 2005	-0.35548	1.2985	-0.44631	0.15396	-0.63767	0.75248	0.049248	0.41317	0.48179	0.27121	0.14459	0.04094	-0.2708	0
								Majungasaurus	Abelisauridae	FMNH PR2100	Smith et al., 2005	-0.77315	0.86961	-0.32779	-0.17565	-0.27055	0.37571	-0.2521	0.92997	0.30409	0.36698	0.1482	-0.077987	-0.17921	0
								Majungasaurus	Abelisauridae	FMNH PR2100	Smith et al., 2005	-0.683	1.0416	-0.67266	-0.57733	-0.73982	0.31904	-0.65227	1.4423	0.274	0.61071	0.32103	0.48016	-0.46142	0
								Majungasaurus	Abelisauridae	FMNH PR2278	Smith et al., 2005	0.21254	0.9615	-0.26182	-0.73944	-0.76743	0.60114	1.0283	0.23944	0.38525	-0.15747	-0.0033517	0.32657	-0.21028	0
								Majungasaurus	Abelisauridae	FMNH PR2278	Smith et al., 2005	0.22702	0.65992	-0.3335	-0.78809	-0.90733	0.22325	0.4841	0.68442	0.83396	0.0063435	-0.25036	-0.28563	0.15976	0
								Aucasaurus	Abelisauridae	MCF-PVPH-236	Hendrickx et al., 2015	1.0694	-0.1593	0.39402	-0.084503	0.55703	-0.45522	-0.1465	-0.95518	-0.66277	-0.08459	0.28122	-0.14671	-0.11085	0
								Aucasaurus	Abelisauridae	MCF-PVPH-236	Hendrickx et al., 2015	-0.66456	1.7231	-0.6569	-1.1299	-1.3773	0.11874	-1.2254	0.88324	-0.59194	0.55667	1.1072	-0.78793	-0.58028	0
								Skorpiovenator	Abelisauridae	MMCH-PV 48	Hendrickx et al., 2015	0.22823	0.28636	0.38234	0.17144	0.12442	-0.022962	0.050149	-1.5946	-0.46297	-0.19653	0.25707	-0.054796	-0.19073	0
								Skorpiovenator	Abelisauridae	MMCH-PV 48	Hendrickx et al., 2015	0.28709	0.44906	-0.052839	-2.3527	-0.86164	0.18977	0.31891	-0.83915	-0.14499	-0.15815	0.41576	0.074637	-0.29665	0
								Carnotaurus	Abelisauridae	MACN-CH 894	Hendrickx et al., 2015	0.42911	-0.09899	0.11708	0.48025	0.40587	-0.35245	0.48701	-0.98042	-0.2225	-0.027628	0.13205	0.026155	-0.073521	0
								Carnotaurus	Abelisauridae	MACN-CH 894	Hendrickx et al., 2015	0.53688	-0.051766	-0.085952	0.11296	-0.17721	-0.10717	0.34371	-1.7463	-0.34063	-0.43187	-0.094819	1.2099	-0.35718	0
								Carnotaurus	Abelisauridae	MACN-CH 894	Hendrickx et al., 2015	0.17608	0.093263	-0.037805	0.2044	0.28165	-0.39107	0.23528	-0.33946	-0.059005	0.11283	0.10297	-0.067532	-0.032715	0
								Carnotaurus	Abelisauridae	MACN-CH 894	Hendrickx et al., 2015	-0.30544	0.34278	-0.11797	-0.087849	0.35324	-0.53834	-0.20273	0.77656	0.46432	-0.037551	-0.46965	-0.92791	0.55121	0
								Abelisauridae	Abelisauridae	MUCPv 641	Hendrickx et al., 2015	-1.2196	1.7743	-0.11116	-0.78059	-1.1152	0.23387	0.10678	0.20393	-0.34462	-0.19318	0.47482	-0.88284	-0.1765	0
								Abelisauridae	Abelisauridae	MUCPv 482	Hendrickx et al., 2015	-1.06	1.2639	-0.072579	-0.51178	-1.6023	0.51951	-0.2861	-2.0761	-0.72924	-0.78304	0.31468	0.028757	-0.42308	0
								Abelisauridae	Abelisauridae	MHNA.PV.2008.1.43	Young et al., 2019 (C.H. pers. measurements)	0.039634	-0.19604	0.81628	-0.8666	0.40771	-0.071409	1.3356	-1.6125	-0.081344	-0.034151	0.48406	-1.121	0.13164	0
								Abelisauridae	Abelisauridae	MHNA.PV.2011.12.7	Young et al., 2019 (C.H. pers. measurements)	-0.16148	0.76559	0.4226	-0.83102	-0.31924	0.68697	1.1422	-2.1313	-0.30451	-0.28217	0.62412	-0.51492	-0.29033	0
								Abelisauridae	Abelisauridae	NHM R4190	Young et al., 2019 (C.H. pers. measurements)	0.14744	2.1335	-0.24789	-0.023255	-0.078659	0.81106	-0.57216	-0.14688	-1.0693	-0.38857	0.56321	-0.57705	-0.43318	0
								Abelisauridae	Abelisauridae	MACN 18172	Young et al., 2019 (C.H. pers. measurements)	-0.69178	0.79395	0.36927	-1.0393	-0.84759	-0.16241	0.82815	-0.77699	-0.82891	-0.61046	0.49931	-0.95434	-0.074338	0
								Abelisauridae	Abelisauridae	UCPC 10	Hendrickx et al., 2015	-0.83864	0.9572	0.1649	-0.52491	-0.52584	-0.49377	0.33771	0.67871	0.1783	-0.065579	-0.089916	-0.34523	0.12722	0
								Abelisauridae	Abelisauridae	UCPC 10	Smith & Lamanna, 2006	-0.15602	0.31701	-0.25299	-0.34381	-0.31025	0.15397	-0.2447	0.21704	-0.2547	-0.020537	0.086114	0.81706	-0.39654	0
								Abelisauridae	Abelisauridae	MGUP MEGA002	Smith & Lamanna, 2006	-0.20903	1.0448	-0.51837	0.63521	0.21105	0.099841	-1.133	1.7269	-0.59241	0.59504	0.54489	0.17824	-0.52934	0
								Abelisauridae	Abelisauridae	MCPM 13693	Smith & Vechia, 2006	0.72593	-0.0862	-0.16176	0.67392	-0.13298	-0.14703	-0.57595	-0.2829	-0.34578	0.066664	0.12763	0.33385	-0.25682	0
								Monolophosaurus	Non-megalosauran Megalosauroidea	IVPP 84019	Hendrickx et al., 2020	0.75646	-0.78216	0.58874	0.044723	0.95102	-1.065	0.27004	-0.42588	-0.091359	0.17241	-0.26321	1.655	-0.20813	0
								Monolophosaurus	Non-megalosauran Megalosauroidea	IVPP 84019	Hendrickx et al., 2020	0.8591	-0.54905	0.28106	-1.5165	0.18084	-0.81273	0.031663	-0.032646	0.17234	0.14785	-0.052966	0.024872	0.14193	0
								Monolophosaurus	Non-megalosauran Megalosauroidea	IVPP 84019	Hendrickx et al., 2020	-0.3174	0.6712	-1.1089	-1.195	-0.71976	-1.1998	-1.8901	3.5313	0.84556	1.1168	-0.049655	-0.62832	0.24561	0
								Monolophosaurus	Non-megalosauran Megalosauroidea	IVPP 84019	Hendrickx et al., 2020	-0.21051	-0.5008	-0.28274	-1.0989	-0.40784	-0.83247	-0.24912	0.10704	0.27095	0.42226	0.086294	0.52471	-0.11784	0
								Monolophosaurus	Non-megalosauran Megalosauroidea	IVPP 84019	Hendrickx et al., 2020	-0.0040853	-0.1286	-0.20045	-0.098394	0.56828	-0.90988	-0.69441	0.8683	-0.5642	0.32009	0.21678	0.19643	-0.15339	0
								Monolophosaurus	Non-megalosauran Megalosauroidea	IVPP 84019	Hendrickx et al., 2020	0.036952	0.63017	-0.62011	0.43872	-0.35769	-0.11591	-1.0889	-0.36066	-0.19115	0.050941	-0.057162	1.0684	-0.41611	0
								Monolophosaurus	Non-megalosauran Megalosauroidea	IVPP 84019	Hendrickx et al., 2020	-1.2304	1.3074	-1.0009	-0.86873	-0.32465	-0.60362	-1.6012	3.39	0.7555	1.0913	0.073555	-0.66422	0.1142	0
								Monolophosaurus	Non-megalosauran Megalosauroidea	IVPP 84019	Hendrickx et al., 2020	-0.2473	0.50429	-0.22542	0.76244	0.52936	-0.43213	-0.56409	0.65036	0.034343	0.5802	0.25743	-0.69057	0.033612	0
								Monolophosaurus	Non-megalosauran Megalosauroidea	IVPP 84019	Hendrickx et al., 2020	-0.38338	-0.34187	0.30114	-0.050424	-0.64537	-1.0059	-0.32447	-0.69924	0.020491	0.3906	0.32185	-0.31099	-0.025698	0
								Monolophosaurus	Non-megalosauran Megalosauroidea	IVPP 84019	Hendrickx et al., 2020	-0.52979	0.64157	0.005379	-0.30714	-0.52399	-0.68524	-0.49667	0.37807	-0.64929	0.013088	0.2745	0.49449	-0.36016	0
								Monolophosaurus	Non-megalosauran Megalosauroidea	IVPP 84019	Hendrickx et al., 2020	-0.28822	-0.26759	-0.038732	-0.78954	-1.137	-0.6068	-1.2631	-1.5628	-0.73254	-0.2946	0.19834	0.67619	-0.37514	0
								Monolophosaurus	Non-megalosauran Megalosauroidea	IVPP 84019	Hendrickx et al., 2020	-0.80935	0.23957	0.38754	0.1283	0.17843	-0.8956	-0.38609	0.10756	-1.0852	-0.19422	0.23123	0.35033	-0.26151	0
								Piatnitzkysaurus	Non-megalosauran Megalosauroidea	PVL 4073	Hendrickx et al., 2020	-0.53245	-0.030673	0.66718	-0.16579	-0.45074	-0.020405	1.0542	-2.4767	-0.12815	-0.090071	0.50702	-0.32231	-0.18665	0
								Piatnitzkysaurus	Non-megalosauran Megalosauroidea	PVL 4073	Hendrickx et al., 2020	-1.1106	0.47796	0.60528	-0.051008	-0.047979	-0.42543	0.50587	-0.78818	-1.0276	-0.49477	0.35016	-0.30568	-0.15988	0
								Piatnitzkysaurus	Non-megalosauran Megalosauroidea	MACN-CH 895	Hendrickx et al., 2020	1.5654	-0.32374	0.22207	-1.0379	0.53614	-0.085578	0.079357	-0.86075	0.8066	0.5559	0.092068	-0.43545	0.16686	0
								Piatnitzkysaurus	Non-megalosauran Megalosauroidea	MACN-CH 895	Hendrickx et al., 2020	0.39056	0.28533	0.036115	-1.0471	-0.31146	-0.19383	0.12294	-0.20324	0.87684	0.48698	0.016297	-0.077306	0.055131	0
								Marshosaurus	Non-megalosauran Megalosauroidea	UMNH VP 6368	Hendrickx et al., 2020	-1.0814	0.035951	0.32758	-0.35696	-1.1587	-0.97655	0.46625	-0.23986	0.81609	0.38858	0.0095881	-0.47562	0.22692	0
								Marshosaurus	Non-megalosauran Megalosauroidea	UMNH VP 6368	Hendrickx et al., 2020	-1.4283	0.76726	0.38446	0.55629	-0.091542	-1.0695	-0.28455	1.0173	-0.89402	-0.029205	0.3431	-0.92911	0.045138	0
								Marshosaurus	Non-megalosauran Megalosauroidea	DMNH 3718	Hendrickx et al., 2020	-0.043746	-0.0083591	-0.12636	-1.5917	-1.6216	0.060575	-0.367	-2.2757	0.05292	-0.21904	0.19451	0.83371	-0.42032	0
								Marshosaurus	Non-megalosauran Megalosauroidea	DMNH 3718	Hendrickx et al., 2020	-0.074078	0.3406	0.23086	-3.114	-0.49244	0.36596	0.70146	-1.1518	-0.96352	-0.65779	0.66481	-0.50341	-0.27828	0
								Marshosaurus	Non-megalosauran Megalosauroidea	DMNH 3718	Hendrickx et al., 2020	-0.40796	0.80979	-0.32544	-2.2676	-0.8784	-0.29846	-0.87691	0.75608	-1.0792	-0.096559	0.7053	-0.154	-0.45081	0
								Marshosaurus	Non-megalosauran Megalosauroidea	DMNH 3718	Hendrickx et al., 2020	-0.82462	0.52255	-0.097086	-1.4005	-1.1706	-0.57159	-0.9324	0.31883	-0.24296	0.11801	0.52702	-1.9489	0.23905	0
								Marshosaurus	Non-megalosauran Megalosauroidea	DMNH 3718	Hendrickx et al., 2020	-1.073	0.3362	-0.26343	-1.558	-1.6188	-0.36799	-1.0133	-0.56497	-0.24968	0.33565	0.70335	-0.19829	-0.39619	0
								Marshosaurus	Non-megalosauran Megalosauroidea	DMNH 3718	Hendrickx et al., 2020	-2.1656	-0.10095	-0.3367	1.0693	-2.436	-1.5536	-1.9326	-0.12815	0.98159	1.7287	0.73178	-0.20187	-0.30492	0
								Afrovenator	Megalosauridae	UC UBA 1	Hendrickx et al., 2020	1.6211	1.0651	-0.15759	-2.1565	0.56004	0.74748	0.27068	-0.013154	-0.35048	-0.27798	0.17773	0.54819	-0.36631	0
								Duriavenator	Megalosauridae	BMNH R332	Hendrickx et al., 2020	1.5008	0.3908	0.036206	-1.2888	0.33705	0.23695	-0.0019739	-0.52378	0.21387	0.15659	0.2165	-0.582	0.034362	0
								Duriavenator	Megalosauridae	BMNH R332	Hendrickx et al., 2020	0.69432	0.65873	-0.22686	-2.3568	-0.24892	0.1689	-0.70302	0.28196	0.1537	-0.19574	-0.032138	-1.1423	0.29852	0
								Duriavenator	Megalosauridae	BMNH R332	Hendrickx et al., 2020	0.98217	1.2721	-0.22971	0.10933	0.17698	0.45361	-1.1252	-0.81352	-1.1053	-0.6556	0.014585	0.7832	-0.48406	0
								Duriavenator	Megalosauridae	BMNH R332	Hendrickx et al., 2020	0.65087	1.6178	-0.4042	0.10649	-0.55873	0.81774	-1.096	-1.4315	-0.62453	-0.78134	-0.19543	1.0104	-0.48877	0
								Duriavenator	Megalosauridae	BMNH R332	Hendrickx et al., 2020	1.3804	0.45084	-0.21703	-0.76702	-0.2967	-0.18988	0.63529	1.1299	-0.38626	-0.50563	-0.17436	0.32687	-0.065272	0
								Duriavenator	Megalosauridae	BMNH R332	Hendrickx et al., 2020	1.0536	0.4253	-0.28198	-0.13456	-0.38434	-0.14772	0.1282	0.90037	0.016354	-0.019753	-0.015292	-0.15314	-0.013617	0
								Duriavenator	Megalosauridae	BMNH R332	Hendrickx et al., 2020	0.52502	0.86162	-0.50845	-0.37342	-0.30706	0.058793	-0.34266	1.3797	-0.56027	-0.059104	0.14401	0.80723	-0.46651	0
								Megalosaurus	Megalosauridae	BMNH R39476	Hendrickx et al., 2020	0.95627	0.055938	0.24928	-0.6533	0.58316	-0.14979	-0.40765	-0.73169	-0.57977	0.024603	0.41409	-0.61766	-0.07073	0
								Megalosaurus	Megalosauridae	BMNH R47152	Hendrickx et al., 2020	-0.50732	-0.86352	0.51027	-0.43876	-0.29505	-1.2625	0.0091498	-0.63569	0.15454	0.39038	0.11566	0.2514	0.006692	0
								Megalosaurus	Megalosauridae	BMNH R234	Hendrickx et al., 2020	1.6503	0.38012	0.12598	-1.0713	0.81093	0.10754	0.12289	-0.33934	-0.43661	-0.12946	0.13216	0.56484	-0.27395	0
								Megalosaurus	Megalosauridae	BMNH R31834	Hendrickx et al., 2020	0.30204	0.78723	-0.24409	-1.2928	-0.34596	-0.18204	-0.72516	0.45639	-0.57304	0.1019	0.43972	0.15595	-0.37783	0
								Megalosaurus	Megalosauridae	BMNH R47963	Hendrickx et al., 2020	1.7237	0.14	0.11752	-0.99878	0.48669	0.31402	-0.20579	-1.6218	-0.77128	-0.4301	0.19434	0.75947	-0.4158	0
								Megalosaurus	Megalosauridae	BMNH R28608	Hendrickx et al., 2020	1.3618	1.1335	-0.035096	-0.15672	0.6072	0.70467	0.43506	-0.7153	0.46304	0.046712	-0.24597	1.59	-0.43423	0
								Megalosaurus	Megalosauridae	BMNH R2635 big	Hendrickx et al., 2020	1.8132	0.38136	-0.014029	-1.176	0.56618	0.28608	-0.19121	-0.52159	0.058769	0.19042	0.24916	-0.27158	-0.088765	0
								Megalosaurus	Megalosauridae	BMNH R2635 small	Hendrickx et al., 2020	-0.62886	0.37894	0.49395	-0.33123	-0.13864	-0.75253	1.0756	0.39569	0.76041	0.035917	-0.42929	0.069317	0.30625	0
								Megalosaurus	Megalosauridae	OUMNH J13505	Hendrickx et al., 2020	1.4006	0.63743	-0.15638	-1.1087	0.076455	0.25922	-0.43535	-0.12571	0.80233	0.37607	0.037885	-1.1727	0.2992	0
								Megalosaurus	Megalosauridae	OUMNH J13506	Hendrickx et al., 2020	1.6394	-0.73794	0.060174	-1.031	-0.17632	-1.1273	1.0957	-0.061567	0.072912	-0.23739	-0.17179	-0.11357	0.27822	0
								Dubreuillosaurus	Megalosauridae	MNHN 1998-13	Hendrickx et al., 2020	-1.4216	1.0004	0.3181	1.1297	-0.94254	-0.46296	1.154	-0.54217	0.92638	0.10248	-0.50174	1.9057	-0.30449	0
								Dubreuillosaurus	Megalosauridae	MNHN 1998-13	Hendrickx et al., 2020	-0.7071	0.66983	0.42087	0.65473	-0.16031	-0.68316	0.86089	0.20202	0.51237	0.23101	-0.19234	0.50747	-0.012133	0
								Dubreuillosaurus	Megalosauridae	MNHN 1998-13	Hendrickx et al., 2020	0.19506	0.96371	-0.26199	-1.1255	-0.98411	-0.14197	-0.73985	-0.086439	-0.99698	-0.14281	0.74656	-0.64733	-0.36765	0
								Dubreuillosaurus	Megalosauridae	MNHN 1998-13	Hendrickx et al., 2020	0.51106	0.53777	0.20856	-1.5206	-0.56391	0.51821	0.15839	-2.2407	-1.464	-0.85763	0.80874	-0.81929	-0.36915	0
								Dubreuillosaurus	Megalosauridae	MNHN 1998-13	Hendrickx et al., 2020	-0.30967	1.1075	-0.25164	-0.86489	-0.64616	-0.47613	-0.89998	1.2636	-0.43837	0.28298	0.55987	-1.2252	-0.036205	0
								Dubreuillosaurus	Megalosauridae	MNHN 1998-13	Hendrickx et al., 2020	-0.091677	0.85598	-0.10694	-1.682	-0.59409	-0.30693	-0.69095	0.726	-0.18653	-0.49602	-0.15248	-1.4922	0.45242	0
								Dubreuillosaurus	Megalosauridae	MNHN 1998-13	Hendrickx et al., 2020	-0.91218	1.2137	0.14899	-0.15634	-0.1257	-0.2329	-0.69641	0.59367	-0.46981	-0.23915	0.21903	-2.2951	0.43929	0
								Dubreuillosaurus	Megalosauridae	MNHN 1998-13	Hendrickx et al., 2020	-0.67408	0.75516	0.042343	0.59448	-1.0852	-0.62968	-0.5602	-0.85242	-0.88194	-0.77625	-0.26854	1.4038	-0.41296	0
								Dubreuillosaurus	Megalosauridae	MNHN 1998-13	Hendrickx et al., 2020	-0.69784	0.974	-0.070302	0.95185	-1.2829	-0.61612	-0.99977	-0.8866	-1.1169	-0.91719	-0.2641	1.178	-0.40417	0
								Dubreuillosaurus	Megalosauridae	MNHN 1998-13	Hendrickx et al., 2020	-0.80868	1.0657	-0.39271	1.0968	-2.2475	-0.26473	-2.0001	-2.2626	-0.82426	-1.6166	-1.0057	1.7997	-0.28867	0
								Torvosaurus	Megalosauridae	BYUVP 725 12817	Hendrickx et al., 2020	2.9433	1.4929	-0.22684	-1.8619	0.94691	1.304	0.7889	-0.2984	-0.15881	-0.2681	0.19789	0.6242	-0.44	0
								Torvosaurus	Megalosauridae	BMNH R36728	Hendrickx et al., 2020	2.9861	1.1123	-0.046886	-1.686	1.0375	1.387	0.60216	-1.1889	-0.27972	-0.20791	0.5064	-0.57335	-0.24796	0
								Torvosaurus	Megalosauridae	ML 1100	Hendrickx et al., 2020	2.7483	1.1001	-0.48234	-3.3677	0.37892	1.1605	0.1172	0.089925	0.37241	-0.19018	0.0034393	0.019739	-0.10123	0
								Torvosaurus	Megalosauridae	ML 1853	Hendrickx et al., 2020	1.8044	1.1959	-0.23671	-0.20288	0.6899	0.86744	-0.83251	-0.80559	-0.31536	0.071475	0.34836	-0.24237	-0.30568	0
								Torvosaurus	Megalosauridae	ML 962 (Mesial)	Hendrickx et al., 2020	2.0806	0.81993	-0.18066	-0.70153	-0.41022	-0.27161	1.94	0.35406	0.23785	-0.57981	-0.26169	-0.30793	0.24006	0
								Torvosaurus	Megalosauridae	ML 857	Hendrickx et al., 2020	1.9344	1.1245	-0.84688	-0.35171	-1.3053	-0.19211	0.47587	0.48342	0.52316	0.11265	0.019737	0.35723	-0.19248	0
								Torvosaurus	Megalosauridae	SHN.067	Hendrickx et al., 2020	2.6312	1.9838	-0.54873	-1.5896	-1.4867	0.79132	2.809	1.1428	0.19379	-0.89018	-0.12467	0.63612	-0.28161	0
								Torvosaurus	Megalosauridae	SHN.215	Hendrickx et al., 2020	1.2099	1.329	-0.36571	-0.94623	-0.98741	0.69959	1.6628	0.40161	0.10848	-0.48163	0.012215	0.68812	-0.3581	0
								Torvosaurus	Megalosauridae	SHN.221	Hendrickx et al., 2020	1.7363	1.6064	-0.38119	-0.67361	-1.1156	0.74124	1.9815	0.60147	0.54484	-0.51691	-0.15816	-0.10055	-0.027489	0
								Torvosaurus	Megalosauridae	SHN.257	Hendrickx et al., 2020	1.2951	0.97288	-0.029062	-0.12125	-0.31436	0.47768	1.6326	0.20204	0.072621	-0.44025	-0.014485	-0.25998	-0.019323	0
								Torvosaurus	Megalosauridae	SHN.266	Hendrickx et al., 2020	1.3119	0.75648	-0.40199	-1.4767	-0.74165	-0.088036	0.77223	1.5657	-0.050024	-0.71006	-0.47483	0.46107	0.050108	0
								Torvosaurus	Megalosauridae	SHN.268	Hendrickx et al., 2020	1.973	2.0455	-0.58294	-1.3886	-1.0793	0.73143	1.9716	1.5673	-0.093009	-0.99295	-0.31099	0.73052	-0.24203	0
								Torvosaurus	Megalosauridae	SHN.294	Hendrickx et al., 2020	1.2298	1.1741	-0.26942	-0.23307	-0.5696	0.479	1.1615	0.57058	0.1176	-0.37771	-0.067279	-0.018276	-0.092331	0
								Torvosaurus	Megalosauridae	SHN.304	Hendrickx et al., 2020	1.3058	0.30859	-0.19013	-0.65835	-1.474	0.37225	1.693	-0.79694	1.0864	0.19314	0.17997	-0.14196	-0.074841	0
								Torvosaurus	Megalosauridae	SHN.319	Hendrickx et al., 2020	2.2708	0.3675	-0.0039914	-0.84438	-0.56865	-0.035422	2.0077	0.32509	-0.10886	-0.58313	-0.021057	0.04897	-0.023457	0
								Torvosaurus	Megalosauridae	SHN.320	Hendrickx et al., 2020	2.4614	0.94123	-0.28428	-1.2022	-1.051	0.16434	2.0617	0.82878	0.19958	-0.74597	-0.26366	0.11377	0.045741	0
								Torvosaurus	Megalosauridae	SHN.359a	Hendrickx et al., 2020	0.052312	0.78213	-0.1704	-1.1682	-0.72699	0.57372	1.2924	0.14554	0.25333	-0.2573	0.015624	0.6211	-0.28548	0
								Torvosaurus	Megalosauridae	SHN.362	Hendrickx et al., 2020	1.4962	1.8151	-0.55716	0.011341	-0.69386	0.69166	0.85405	1.0285	-0.12629	-0.44143	-0.0311	0.32408	-0.30131	0
								Torvosaurus	Megalosauridae	SHN.364	Hendrickx et al., 2020	1.2476	0.32882	0.0045545	0.37746	-0.91645	0.4443	1.5062	-1.1436	0.94842	0.23999	0.23581	-0.71207	0.041806	0
								Torvosaurus	Megalosauridae	SHN.374	Hendrickx et al., 2020	2.4382	1.5195	-0.89893	-2.1287	-1.7352	0.17985	1.2911	1.9953	0.0019649	-0.83561	-0.3859	1.2689	-0.30657	0
								Torvosaurus	Megalosauridae	SHN.401	Hendrickx et al., 2020	2.5363	1.1753	-0.53268	-2.271	-1.9147	0.33942	2.5971	0.96497	0.69364	-0.72425	-0.29842	0.55941	-0.058786	0
								Torvosaurus	Megalosauridae	SHN.440	Hendrickx et al., 2020	1.1343	0.63174	-0.33946	-1.2969	-1.9013	0.37239	1.6587	-0.058523	1.9423	-0.15716	-0.58383	-0.83669	0.564	0
								Torvosaurus	Megalosauridae	SHN.441	Hendrickx et al., 2020	2.5981	0.88028	-0.27229	-1.2334	-1.2857	0.21092	2.35	0.54501	0.48329	-0.60704	-0.18341	-0.039626	0.067006	0
								Torvosaurus	Megalosauridae	SHN.442	Hendrickx et al., 2020	1.5503	0.36205	-0.19551	-1.042	-1.7816	0.37513	2.2069	-0.66846	1.5221	0.19986	0.091132	-0.49641	0.11318	0
								Torvosaurus	Megalosauridae	SHN.470	Hendrickx et al., 2020	2.631	0.65952	-0.38988	-2.5379	-1.5501	-0.049581	2.4538	1.1261	0.17132	-0.87341	-0.29108	0.87293	-0.11102	0
								cf. Baryonychinae	Spinosauridae	XMDFEC V0010	Hendrickx et al., 2020	0.064555	-0.64198	0.70455	-1.3132	-0.008106	-0.81375	1.5466	-0.64092	0.59392	0.21932	0.0048833	0.27782	0.10488	0
								Suchosaurus	Spinosauridae	BMNH R36536 (Owen, 1841)	Hendrickx et al., 2020	1.4054	-7.4578	4.3825	1.5218	-0.014706	3.5271	-1.5426	2.6849	-0.76618	-2.4511	1.4108	1.1779	-1.5166	0
								Baryonyx	Spinosauridae	BMNH R9951	Hendrickx et al., 2020	0.096449	-3.3158	1.9217	0.099416	-2.3435	2.6736	1.1293	-0.79938	0.18664	3.5922	-2.1237	-0.15628	1.1018	0
								Baryonyx	Spinosauridae	BMNH R9951	Hendrickx et al., 2020	-0.18358	-5.2044	2.5178	-0.60308	-1.1073	0.6113	0.51816	0.84856	-1.5779	2.8863	-2.5619	0.89909	1.2393	0
								Baryonyx	Spinosauridae	BMNH R9951	Hendrickx et al., 2020	-0.82314	-4.6311	2.7016	0.16453	-1.2876	1.0943	1.0329	0.050693	-1.7037	2.7637	-2.2436	-0.098027	1.2787	0
								Baryonyx	Spinosauridae	BMNH R9951	Hendrickx et al., 2020	0.98906	-1.2687	0.12738	0.31155	-0.23212	-1.1219	-0.77152	-0.70472	2.539	1.9174	-0.099446	-0.56999	0.48581	0
								Baryonyx	Spinosauridae	BMNH R9951	Hendrickx et al., 2020	1.0398	-0.36823	0.30268	0.79553	0.77686	-0.93404	-0.058517	-0.057052	0.80571	0.66961	-0.47995	1.7845	-0.14147	0
								Baryonyx	Spinosauridae	BMNH R9951	Hendrickx et al., 2020	0.51823	-5.7392	3.0415	0.0654	-1.3861	2.6085	-0.032978	-0.36445	-3.7607	3.2272	-2.6247	-0.16193	1.2796	0
								Baryonyx	Spinosauridae	BMNH R9951	Hendrickx et al., 2020	0.75885	-3.6161	1.1053	0.030068	0.78974	-2.6581	-0.44255	-1.774	0.38083	0.94712	-0.12079	1.1528	0.16935	0
								Baryonyx	Spinosauridae	BMNH R9951	Hendrickx et al., 2020	1.214	-6.9362	3.0942	-0.085051	-0.76847	1.5448	-0.79797	0.2434	-1.6385	1.7072	-1.253	1.2215	0.30159	0
								Baryonyx	Spinosauridae	BMNH R9951	Hendrickx et al., 2020	-0.27386	-5.4589	3.1256	0.46233	-1.2467	2.2286	0.40195	-0.22041	-3.3462	3.1497	-2.5648	-0.17837	1.3051	0
								Baryonyx	Spinosauridae	BMNH R9951	Hendrickx et al., 2020	-0.062287	-2.3558	2.4745	0.89026	-1.1097	3.9778	1.2333	1.4332	-2.8065	2.8488	-2.9339	0.32291	1.0767	0
								Baryonyx	Spinosauridae	BMNH R9951	Hendrickx et al., 2020	0.50662	-5.2962	2.8246	0.26445	-0.55859	1.7984	-0.29373	0.64943	-3.236	3.0594	-2.5339	-0.29152	1.3605	0
								Baryonyx	Spinosauridae	BMNH R9951	Hendrickx et al., 2020	-0.882	0.22749	0.65202	1.4514	0.2753	-0.43501	0.30162	0.26749	0.49763	0.42086	-0.25663	0.78807	-0.089945	0
								Baryonyx	Spinosauridae	BMNH R9951	Hendrickx et al., 2020	-0.086536	-1.8987	1.1356	0.92882	2.0915	-2.5031	-0.40272	0.42898	-1.5038	-0.2631	-0.575	2.6306	-0.22652	0
								Baryonyx	Spinosauridae	BMNH R9951	Hendrickx et al., 2020	-0.43108	-3.7389	1.2008	0.41953	-0.26283	-2.5829	-0.092882	-1.7841	1.0638	1.4096	-0.56312	1.8112	0.22297	0
								Baryonyx	Spinosauridae	BMNH R9951	Hendrickx et al., 2020	1.2918	-6.2458	2.9179	-0.45383	-0.98044	2.2043	-0.15255	-0.39732	-2.9106	3.5492	-2.5502	-0.1792	1.3792	0
								Baryonyx	Spinosauridae	BMNH R9951	Hendrickx et al., 2020	1.086	-3.6267	1.9288	0.88884	-2.4511	3.9969	-0.58344	-0.5651	-1.1641	4.2316	-2.4858	-0.9684	1.2913	0
								Baryonyx	Spinosauridae	BMNH R9951	Hendrickx et al., 2020	1.7621	-3.5067	0.90089	-0.31623	1.0588	-2.3394	-0.56609	-1.7047	0.5331	1.004	-0.19184	1.5143	0.085201	0
								Baryonyx	Spinosauridae	BMNH R9951	Hendrickx et al., 2020	0.41162	-2.6363	0.69248	0.24988	0.98669	-2.417	-1.3079	-0.11328	0.63131	1.4335	-0.0041112	0.34491	0.26659	0
								Baryonyx	Spinosauridae	BMNH R9951	Hendrickx et al., 2020	0.88881	-4.0344	1.1964	0.2142	0.96951	-2.1133	-0.072888	-2.1294	-0.35133	0.54505	0.3563	-0.89738	0.44618	0
								Baryonyx	Spinosauridae	BMNH R9951	Hendrickx et al., 2020	0.098575	-3.6407	1.0425	-0.096507	0.80363	-1.8128	-0.27996	-1.911	-0.19735	0.58815	0.30938	-0.60438	0.33991	0
								Baryonyx	Spinosauridae	BMNH R9951a	Hendrickx et al., 2020	0.72332	-4.0248	1.3302	0.55874	1.2346	-2.0203	0.018092	-2.3615	-0.39305	0.55756	0.40528	-1.1222	0.48089	0
								Baryonyx	Spinosauridae	BMNH R9951d	Hendrickx et al., 2020	1.2595	-4.0375	0.96994	-0.050763	0.65074	-2.3354	-0.43632	-1.6277	-0.29881	0.56958	0.26166	-0.76062	0.46181	0
								Baryonyx	Spinosauridae	BMNH R9951e	Hendrickx et al., 2020	0.90258	-3.9358	1.0803	0.31907	0.86355	-2.0781	-0.36053	-2.1158	-0.39504	0.56054	0.34989	-0.70383	0.36619	0
								Baryonyx	Spinosauridae	BMNH R9951f	Hendrickx et al., 2020	0.61706	-3.8508	1.1082	0.12444	0.99314	-2.1851	-0.42431	-1.4691	-0.092875	0.52411	0.092394	-1.3261	0.71701	0
								Baryonyx	Spinosauridae	BMNH R9951h	Hendrickx et al., 2020	1.561	-4.2572	1.1634	0.17285	0.97308	-2.6137	-0.39482	-1.3987	-0.11353	0.33256	-0.11283	-1.634	0.97353	0
								Baryonyx	Spinosauridae	BMNH R9951n	Hendrickx et al., 2020	1.4953	-4.0596	0.95986	0.35273	0.80349	-2.4842	-0.73008	-1.418	-0.32076	0.63051	0.23434	-1.1176	0.58372	0
								Suchomimus	Spinosauridae	UC G69-5	Hendrickx et al., 2020	0.9751	-2.1308	1.2875	-0.45656	0.90466	-1.1922	0.78767	0.75367	3.6496	-2.0272	1.3373	1.0667	-0.74169	0
								Suchomimus	Spinosauridae	UC G67-1	Hendrickx et al., 2020	1.5604	-7.642	3.8842	0.12636	-1.6874	3.265	-0.86236	0.30368	0.64639	-0.49533	0.61804	-1.5484	-0.071765	0
								Suchomimus	Spinosauridae	UC G67-8	Hendrickx et al., 2020	-0.23092	-4.1456	3.2521	0.55153	-2.0496	3.7887	0.49563	1.5886	0.74723	-2.0935	1.4464	0.07448	-1.2429	0
								Suchomimus	Spinosauridae	UC G35-9	Hendrickx et al., 2020	0.45715	-5.358	3.1677	0.75512	-2.5773	3.222	-0.040522	-0.28716	2.6614	-1.2451	1.8163	-1.6746	-0.72699	0
								Suchomimus	Spinosauridae	UC G35-9	Hendrickx et al., 2020	1.0803	-7.339	3.6668	0.99309	-1.4116	2.441	-1.5112	0.63969	0.40212	-1.1371	1.3717	-0.085769	-0.92313	0
								Suchomimus	Spinosauridae	UC G43-4	Hendrickx et al., 2020	1.2277	-4.4444	2.9187	0.88534	-1.0389	3.5044	-1.6485	2.7676	1.5481	-2.2062	0.25168	-0.98951	-0.24699	0
								Suchomimus	Spinosauridae	UC G26-5	Hendrickx et al., 2020	0.81525	-6.3474	2.9226	-0.18492	-0.95476	0.2467	-1.2504	0.67293	3.8201	-3.2489	2.149	-0.56173	-0.87428	0
								Suchomimus	Spinosauridae	UC G73-3	Hendrickx et al., 2020	0.63024	-4.9717	2.145	0.088852	0.3116	-2.1814	-0.66331	-0.31208	4.8901	-4.2951	4.2646	0.38992	-2.0427	0
								Suchomimus	Spinosauridae	UC G73-3	Hendrickx et al., 2020	-0.86692	-4.3215	3.5712	0.79149	-1.7133	3.921	0.73733	2.3231	1.306	-1.9156	0.63715	-0.066441	-0.72239	0
								Suchomimus	Spinosauridae	UC G34-12	Hendrickx et al., 2020	0.17236	-2.7377	1.1824	-1.2496	0.2456	-2.2964	1.3114	-0.84939	1.0387	0.65301	-0.28399	0.36823	0.5086	0
								Suchomimus	Spinosauridae	UC G100-4	Hendrickx et al., 2020	0.61935	-4.8689	2.5443	-1.4273	-1.0052	1.4666	0.56157	-0.37397	-2.9871	2.1594	-1.792	-0.64224	1.1252	0
								Suchomimus	Spinosauridae	UC G22-7	Hendrickx et al., 2020	0.53707	-6.444	3.9929	-0.31548	0.35584	1.5438	0.42279	2.1689	-1.0965	-2.479	1.0968	0.93936	-0.979	0
								Suchomimus	Spinosauridae	UC G34-12	Hendrickx et al., 2020	1.4594	-6.1934	3.4091	0.41444	0.014399	1.7961	-1.0163	1.754	-1.2103	-2.2861	1.1018	2.0255	-1.4195	0
								Suchomimus	Spinosauridae	UC G34-7	Hendrickx et al., 2020	-0.30584	-7.5369	4.1233	2.5145	-1.7709	2.2997	-1.4657	1.5755	1.5523	-1.8129	1.8095	0.35922	-1.3098	0
								Suchomimus	Spinosauridae	UC G34-7	Hendrickx et al., 2020	-1.1873	-4.9067	4.1086	1.9363	-2.2543	4.5563	1.3062	1.3753	1.0162	-2.2261	1.7896	1.0626	-1.7892	0
								Suchomimus	Spinosauridae	UC G54-4	Hendrickx et al., 2020	1.8388	-6.7328	3.3125	0.46619	-0.64484	2.295	-1.0974	0.18672	0.77965	-1.0946	1.4123	0.25314	-0.9748	0
								Suchomimus	Spinosauridae	UC G89-5	Hendrickx et al., 2020	1.5981	-2.8074	1.2232	-1.6507	1.4906	-2.0422	1.0192	0.2376	-1.0134	-1.7931	-1.3557	-0.7078	1.2576	0
								Suchomimus	Spinosauridae	UC G54-4	Hendrickx et al., 2020	2.0434	-2.7327	1.1139	-0.55558	1.7132	-2.1057	0.54137	0.23799	-1.4306	-1.1529	-0.66258	-0.76252	0.85824	0
								Suchomimus	Spinosauridae	UC G48-9	Hendrickx et al., 2020	1.6061	-3.1172	1.153	-1.654	1.7947	-2.4025	0.36228	0.68703	-1.7223	-1.5943	-1.0366	-0.12111	0.91333	0
								Suchomimus	Spinosauridae	UC G67-1	Hendrickx et al., 2020	1.6876	-2.8213	1.1747	-0.87452	1.7308	-1.8885	1.0836	-0.22612	-1.9221	-0.72773	0.12758	0.16418	0.1482	0
								Irritator	Spinosauridae	SMNS 58022	Hendrickx et al., 2020	-1.0956	-2.4661	2.0165	2.3879	-0.10061	-0.76048	0.31802	0.45022	5.0121	-4.2601	3.7777	2.0755	-2.5672	0
								Sinopliosaurus	Spinosauridae	IVPP V4793.1	Hendrickx et al., 2020	0.58071	-6.2352	4.2098	-0.76018	-2.021	5.0608	0.25644	2.7805	2.216	-3.3494	0.43413	-0.26914	-0.59554	0
								Spinosaurinae indet.	Spinosauridae	SMA 0173	Hendrickx et al., 2020	2.6504	-6.3044	3.8992	-0.035155	-0.44473	5.1732	-0.26184	1.674	0.65902	-1.3007	0.77032	-0.52193	-0.68616	0
								Spinosaurinae indet.	Spinosauridae	MSNM V6422	Hendrickx et al., 2020	2.7003	-5.9686	3.286	2.8418	-1.4783	3.6695	-1.4401	1.2457	1.0229	-3.6817	3.1289	-1.4997	-1.7709	0
								Spinosaurinae indet.	Spinosauridae	MSNM V3976	Hendrickx et al., 2020	1.4701	-6.5663	4.2294	1.5232	-1.022	4.995	-0.96417	2.7133	2.1865	-2.7075	1.6819	-0.19498	-1.3363	0
								Spinosaurinae indet.	Spinosauridae	GZG.V.19990	Hendrickx et al., 2020	0.47965	-0.4924	0.54963	1.0215	0.7713	-0.10513	0.68352	-0.9538	-0.30552	-0.039326	0.21152	-0.7669	0.10964	0
								Spinosaurinae indet.	Spinosauridae	GZG.V.20001	Hendrickx et al., 2020	0.55365	-0.48321	0.42375	0.63088	0.46809	-0.10435	0.67578	-0.91863	-0.29981	-0.075913	0.19758	-0.35279	-0.009344	0
								Spinosaurinae indet.	Spinosauridae	GZG.V.20011	Hendrickx et al., 2020	0.22258	-0.67115	0.6675	-0.27604	0.48544	-0.07779	1.6913	-0.90562	-0.10176	-0.11635	0.25327	-0.46243	0.064412	0
								Spinosaurinae indet.	Spinosauridae	GZG.V.20030	Hendrickx et al., 2020	0.14986	0.034823	0.12339	1.4298	0.54965	0.028706	-0.46494	-0.40413	-0.328	0.20648	0.23402	-0.47067	-0.082199	0
								Spinosaurinae indet.	Spinosauridae	GZG.V.20034	Hendrickx et al., 2020	0.87351	-0.84471	0.51601	-0.49805	0.17607	-0.34437	1.5275	-0.71287	-0.14961	-0.15557	0.20064	-0.2346	0.042956	0
								Chienkosaurus	Metriacanthosauridae	IVPP V237.1	Hendrickx et al., 2020	0.61507	0.14233	0.44394	-0.082416	0.86498	-0.33728	0.71385	-0.073656	0.70431	0.41315	-0.21897	0.53338	0.047929	0
[truncated: 587 more rows]
[truncated: 15 more columns]
